# Supplementary material for: Differential Adaptive Potential and Vulnerability to Climate-Driven Habitat Loss in Brazilian Mangroves
Source: Frontiers journal article supplement (doi:10.3389/fcosc.2022.763325), 2022-03-22
Supplement: Table_1.XLSX [file Table_1.XLSX]

## Sheet: Sheet1
ID	pop	latitude	longitude	species	bio1	bio12	bio15	bio3	bio7	gsl	ngd10	salt	surft	dist
AgMRJ36	MRJ	-0.705645	-48.4863	Avicennia germinans	27	3091.23	72.2582	65.1758	5.22527	365	365	22.9124	211.972	221
AgMRJ07	MRJ	-0.705645	-48.4863	Avicennia germinans	27	3091.23	72.2582	65.1758	5.22527	365	365	22.9124	211.972	221
AgMRJ37	MRJ	-0.705645	-48.4863	Avicennia germinans	27	3091.23	72.2582	65.1758	5.22527	365	365	22.9124	211.972	221
AgMRJ20	MRJ	-0.705645	-48.4863	Avicennia germinans	27	3091.23	72.2582	65.1758	5.22527	365	365	22.9124	211.972	221
AgMRJ25	MRJ	-0.705645	-48.4863	Avicennia germinans	27	3091.23	72.2582	65.1758	5.22527	365	365	22.9124	211.972	221
AgMRJ26	MRJ	-0.705645	-48.4863	Avicennia germinans	27	3091.23	72.2582	65.1758	5.22527	365	365	22.9124	211.972	221
AgMRJ29	MRJ	-0.705645	-48.4863	Avicennia germinans	27	3091.23	72.2582	65.1758	5.22527	365	365	22.9124	211.972	221
AgMRJ30	MRJ	-0.705645	-48.4863	Avicennia germinans	27	3091.23	72.2582	65.1758	5.22527	365	365	22.9124	211.972	221
AgPAa11	PAa	-0.904722	-46.6875	Avicennia germinans	26	2649.06	82.297	67.7875	4.41144	365	365	32.1968	200.584	5
AgPAa17	PAa	-0.904722	-46.6875	Avicennia germinans	26	2649.06	82.297	67.7875	4.41144	365	365	32.1968	200.584	5
AgPAa06	PAa	-0.904722	-46.6875	Avicennia germinans	26	2649.06	82.297	67.7875	4.41144	365	365	32.1968	200.584	5
AgPAa13	PAa	-0.904722	-46.6875	Avicennia germinans	26	2649.06	82.297	67.7875	4.41144	365	365	32.1968	200.584	5
AgPAa01	PAa	-0.904722	-46.6875	Avicennia germinans	26	2649.06	82.297	67.7875	4.41144	365	365	32.1968	200.584	5
AgPAa07	PAa	-0.904722	-46.6875	Avicennia germinans	26	2649.06	82.297	67.7875	4.41144	365	365	32.1968	200.584	5
AgPAa08	PAa	-0.904722	-46.6875	Avicennia germinans	26	2649.06	82.297	67.7875	4.41144	365	365	32.1968	200.584	5
AgPAa10	PAa	-0.904722	-46.6875	Avicennia germinans	26	2649.06	82.297	67.7875	4.41144	365	365	32.1968	200.584	5
AgPAa15	PAa	-0.904722	-46.6875	Avicennia germinans	26	2649.06	82.297	67.7875	4.41144	365	365	32.1968	200.584	5
AgPAb50	PAb	-0.939167	-46.7214	Avicennia germinans	26	2609.05	81.6393	69.7896	5.12295	364.768	365	32.1629	200.871	5
AgPAb53	PAb	-0.939167	-46.7214	Avicennia germinans	26	2609.05	81.6393	69.7896	5.12295	364.768	365	32.1629	200.871	5
AgPAb55	PAb	-0.939167	-46.7214	Avicennia germinans	26	2609.05	81.6393	69.7896	5.12295	364.768	365	32.1629	200.871	5
AgPAb35	PAb	-0.939167	-46.7214	Avicennia germinans	26	2609.05	81.6393	69.7896	5.12295	364.768	365	32.1629	200.871	5
AgPAb57	PAb	-0.939167	-46.7214	Avicennia germinans	26	2609.05	81.6393	69.7896	5.12295	364.768	365	32.1629	200.871	5
AgPAb43	PAb	-0.939167	-46.7214	Avicennia germinans	26	2609.05	81.6393	69.7896	5.12295	364.768	365	32.1629	200.871	5
AgPAb46	PAb	-0.939167	-46.7214	Avicennia germinans	26	2609.05	81.6393	69.7896	5.12295	364.768	365	32.1629	200.871	5
AgPAb47	PAb	-0.939167	-46.7214	Avicennia germinans	26	2609.05	81.6393	69.7896	5.12295	364.768	365	32.1629	200.871	5
AgPAb49	PAb	-0.939167	-46.7214	Avicennia germinans	26	2609.05	81.6393	69.7896	5.12295	364.768	365	32.1629	200.871	5
AgALC06	ALC	-2.40971	-44.4057	Avicennia germinans	26.9864	2202.38	81.9538	69.1114	4.72283	364.492	365	31.6851	204.394	268
AgALC15	ALC	-2.40971	-44.4057	Avicennia germinans	26.9864	2202.38	81.9538	69.1114	4.72283	364.492	365	31.6851	204.394	268
AgALC21	ALC	-2.40971	-44.4057	Avicennia germinans	26.9864	2202.38	81.9538	69.1114	4.72283	364.492	365	31.6851	204.394	268
AgALC22	ALC	-2.40971	-44.4057	Avicennia germinans	26.9864	2202.38	81.9538	69.1114	4.72283	364.492	365	31.6851	204.394	268
AgALC26	ALC	-2.40971	-44.4057	Avicennia germinans	26.9864	2202.38	81.9538	69.1114	4.72283	364.492	365	31.6851	204.394	268
AgPNB20	PNB	-2.78051	-41.8236	Avicennia germinans	27	1249.32	97.4305	71.7112	4.96458	320.67	365	35.8129	201.434	268
AgPNB22	PNB	-2.78051	-41.8236	Avicennia germinans	27	1249.32	97.4305	71.7112	4.96458	320.67	365	35.8129	201.434	268
AgPNB01	PNB	-2.78051	-41.8236	Avicennia germinans	27	1249.32	97.4305	71.7112	4.96458	320.67	365	35.8129	201.434	268
AgPNB27	PNB	-2.78051	-41.8236	Avicennia germinans	27	1249.32	97.4305	71.7112	4.96458	320.67	365	35.8129	201.434	268
AgPNB02	PNB	-2.78051	-41.8236	Avicennia germinans	27	1249.32	97.4305	71.7112	4.96458	320.67	365	35.8129	201.434	268
AgPNB07	PNB	-2.78051	-41.8236	Avicennia germinans	27	1249.32	97.4305	71.7112	4.96458	320.67	365	35.8129	201.434	268
AgPNB11	PNB	-2.78051	-41.8236	Avicennia germinans	27	1249.32	97.4305	71.7112	4.96458	320.67	365	35.8129	201.434	268
AgPNB15	PNB	-2.78051	-41.8236	Avicennia germinans	27	1249.32	97.4305	71.7112	4.96458	320.67	365	35.8129	201.434	268
AgPNB19	PNB	-2.78051	-41.8236	Avicennia germinans	27	1249.32	97.4305	71.7112	4.96458	320.67	365	35.8129	201.434	268
AgPRC06	PRC	-3.41269	-39.0571	Avicennia germinans	26.9945	1199.6	99.4863	80.2363	4.91758	323.038	365	36.1284	200.921	330
AgPRC08	PRC	-3.41269	-39.0571	Avicennia germinans	26.9945	1199.6	99.4863	80.2363	4.91758	323.038	365	36.1284	200.921	330
AgPRC01	PRC	-3.41269	-39.0571	Avicennia germinans	26.9945	1199.6	99.4863	80.2363	4.91758	323.038	365	36.1284	200.921	330
AgPRC02	PRC	-3.41269	-39.0571	Avicennia germinans	26.9945	1199.6	99.4863	80.2363	4.91758	323.038	365	36.1284	200.921	330
AgPRC03	PRC	-3.41269	-39.0571	Avicennia germinans	26.9945	1199.6	99.4863	80.2363	4.91758	323.038	365	36.1284	200.921	330
AgPRC04	PRC	-3.41269	-39.0571	Avicennia germinans	26.9945	1199.6	99.4863	80.2363	4.91758	323.038	365	36.1284	200.921	330
AgPRC05	PRC	-3.41269	-39.0571	Avicennia germinans	26.9945	1199.6	99.4863	80.2363	4.91758	323.038	365	36.1284	200.921	330
AgTMD24	TMD	-8.58974	-35.0645	Avicennia germinans	25.7909	1938.35	58.3083	59.7051	6.79088	365	365	37.0863	201.987	928
AgTMD28	TMD	-8.58974	-35.0645	Avicennia germinans	25.7909	1938.35	58.3083	59.7051	6.79088	365	365	37.0863	201.987	928
AgTMD03	TMD	-8.58974	-35.0645	Avicennia germinans	25.7909	1938.35	58.3083	59.7051	6.79088	365	365	37.0863	201.987	928
AgTMD04	TMD	-8.58974	-35.0645	Avicennia germinans	25.7909	1938.35	58.3083	59.7051	6.79088	365	365	37.0863	201.987	928
AgTMD19	TMD	-8.58974	-35.0645	Avicennia germinans	25.7909	1938.35	58.3083	59.7051	6.79088	365	365	37.0863	201.987	928
AgTMD16	TMD	-8.58974	-35.0645	Avicennia germinans	25.7909	1938.35	58.3083	59.7051	6.79088	365	365	37.0863	201.987	928
AgTMD10	TMD	-8.58974	-35.0645	Avicennia germinans	25.7909	1938.35	58.3083	59.7051	6.79088	365	365	37.0863	201.987	928
AgTMD12	TMD	-8.58974	-35.0645	Avicennia germinans	25.7909	1938.35	58.3083	59.7051	6.79088	365	365	37.0863	201.987	928
AgTMD26	TMD	-8.58974	-35.0645	Avicennia germinans	25.7909	1938.35	58.3083	59.7051	6.79088	365	365	37.0863	201.987	928
AgTMD32	TMD	-8.58974	-35.0645	Avicennia germinans	25.7909	1938.35	58.3083	59.7051	6.79088	365	365	37.0863	201.987	928
AsPAR029	PAR	-0.82377	-46.6165	Avicennia schaueriana	26.0189	2701.25	83.573	62.7108	3.22432	365	365	32.2568	199.976	338.58
AsPAR096	PAR	-0.82377	-46.6165	Avicennia schaueriana	26.0189	2701.25	83.573	62.7108	3.22432	365	365	32.2568	199.976	338.58
AsPAR097	PAR	-0.82377	-46.6165	Avicennia schaueriana	26.0189	2701.25	83.573	62.7108	3.22432	365	365	32.2568	199.976	338.58
AsPAR098	PAR	-0.82377	-46.6165	Avicennia schaueriana	26.0189	2701.25	83.573	62.7108	3.22432	365	365	32.2568	199.976	338.58
AsPAR099	PAR	-0.82377	-46.6165	Avicennia schaueriana	26.0189	2701.25	83.573	62.7108	3.22432	365	365	32.2568	199.976	338.58
AsPAR102	PAR	-0.82377	-46.6165	Avicennia schaueriana	26.0189	2701.25	83.573	62.7108	3.22432	365	365	32.2568	199.976	338.58
AsPAR104	PAR	-0.82377	-46.6165	Avicennia schaueriana	26.0189	2701.25	83.573	62.7108	3.22432	365	365	32.2568	199.976	338.58
AsPAR112	PAR	-0.82377	-46.6165	Avicennia schaueriana	26.0189	2701.25	83.573	62.7108	3.22432	365	365	32.2568	199.976	338.58
AsPAR119	PAR	-0.82377	-46.6165	Avicennia schaueriana	26.0189	2701.25	83.573	62.7108	3.22432	365	365	32.2568	199.976	338.58
AsALC004	ALC	-2.40971	-44.4057	Avicennia schaueriana	26.9864	2202.38	81.9538	69.1114	4.72283	364.492	365	31.6851	204.394	338.58
AsALC005	ALC	-2.40971	-44.4057	Avicennia schaueriana	26.9864	2202.38	81.9538	69.1114	4.72283	364.492	365	31.6851	204.394	338.58
AsALC010	ALC	-2.40971	-44.4057	Avicennia schaueriana	26.9864	2202.38	81.9538	69.1114	4.72283	364.492	365	31.6851	204.394	338.58
AsALC011	ALC	-2.40971	-44.4057	Avicennia schaueriana	26.9864	2202.38	81.9538	69.1114	4.72283	364.492	365	31.6851	204.394	338.58
AsALC015	ALC	-2.40971	-44.4057	Avicennia schaueriana	26.9864	2202.38	81.9538	69.1114	4.72283	364.492	365	31.6851	204.394	338.58
AsALC033	ALC	-2.40971	-44.4057	Avicennia schaueriana	26.9864	2202.38	81.9538	69.1114	4.72283	364.492	365	31.6851	204.394	338.58
AsPRC002	PRC	-3.41269	-39.0571	Avicennia schaueriana	26.9945	1199.6	99.4863	80.2363	4.91758	323.038	365	36.1284	200.921	632.84
AsPRC004	PRC	-3.41269	-39.0571	Avicennia schaueriana	26.9945	1199.6	99.4863	80.2363	4.91758	323.038	365	36.1284	200.921	632.84
AsPRC007	PRC	-3.41269	-39.0571	Avicennia schaueriana	26.9945	1199.6	99.4863	80.2363	4.91758	323.038	365	36.1284	200.921	632.84
AsPRC008	PRC	-3.41269	-39.0571	Avicennia schaueriana	26.9945	1199.6	99.4863	80.2363	4.91758	323.038	365	36.1284	200.921	632.84
AsPRC011	PRC	-3.41269	-39.0571	Avicennia schaueriana	26.9945	1199.6	99.4863	80.2363	4.91758	323.038	365	36.1284	200.921	632.84
AsPRC015	PRC	-3.41269	-39.0571	Avicennia schaueriana	26.9945	1199.6	99.4863	80.2363	4.91758	323.038	365	36.1284	200.921	632.84
AsPRC018	PRC	-3.41269	-39.0571	Avicennia schaueriana	26.9945	1199.6	99.4863	80.2363	4.91758	323.038	365	36.1284	200.921	632.84
AsPRC029	PRC	-3.41269	-39.0571	Avicennia schaueriana	26.9945	1199.6	99.4863	80.2363	4.91758	323.038	365	36.1284	200.921	632.84
AsPRC030	PRC	-3.41269	-39.0571	Avicennia schaueriana	26.9945	1199.6	99.4863	80.2363	4.91758	323.038	365	36.1284	200.921	632.84
AsVER120	VER	-12.934	-38.6742	Avicennia schaueriana	25	1772.68	49.1395	45.7079	5.86053	365	365	37.2787	204.049	1375.4
AsVER123	VER	-12.934	-38.6742	Avicennia schaueriana	25	1772.68	49.1395	45.7079	5.86053	365	365	37.2787	204.049	1375.4
AsVER124	VER	-12.934	-38.6742	Avicennia schaueriana	25	1772.68	49.1395	45.7079	5.86053	365	365	37.2787	204.049	1375.4
AsVER133	VER	-12.934	-38.6742	Avicennia schaueriana	25	1772.68	49.1395	45.7079	5.86053	365	365	37.2787	204.049	1375.4
AsVER135	VER	-12.934	-38.6742	Avicennia schaueriana	25	1772.68	49.1395	45.7079	5.86053	365	365	37.2787	204.049	1375.4
AsVER139	VER	-12.934	-38.6742	Avicennia schaueriana	25	1772.68	49.1395	45.7079	5.86053	365	365	37.2787	204.049	1375.4
AsVER140	VER	-12.934	-38.6742	Avicennia schaueriana	25	1772.68	49.1395	45.7079	5.86053	365	365	37.2787	204.049	1375.4
AsVER141	VER	-12.934	-38.6742	Avicennia schaueriana	25	1772.68	49.1395	45.7079	5.86053	365	365	37.2787	204.049	1375.4
AsVER147	VER	-12.934	-38.6742	Avicennia schaueriana	25	1772.68	49.1395	45.7079	5.86053	365	365	37.2787	204.049	1375.4
AsGPM001	GPM	-22.6989	-43.0015	Avicennia schaueriana	23.9975	1678.77	51.8615	51.9748	14.4081	365	365	36.394	219.119	218.86
AsGPM004	GPM	-22.6989	-43.0015	Avicennia schaueriana	23.9975	1678.77	51.8615	51.9748	14.4081	365	365	36.394	219.119	218.86
AsGPM005	GPM	-22.6989	-43.0015	Avicennia schaueriana	23.9975	1678.77	51.8615	51.9748	14.4081	365	365	36.394	219.119	218.86
AsGPM006	GPM	-22.6989	-43.0015	Avicennia schaueriana	23.9975	1678.77	51.8615	51.9748	14.4081	365	365	36.394	219.119	218.86
AsGPM013	GPM	-22.6989	-43.0015	Avicennia schaueriana	23.9975	1678.77	51.8615	51.9748	14.4081	365	365	36.394	219.119	218.86
AsGPM016	GPM	-22.6989	-43.0015	Avicennia schaueriana	23.9975	1678.77	51.8615	51.9748	14.4081	365	365	36.394	219.119	218.86
AsGPM027	GPM	-22.6989	-43.0015	Avicennia schaueriana	23.9975	1678.77	51.8615	51.9748	14.4081	365	365	36.394	219.119	218.86
AsGPM030	GPM	-22.6989	-43.0015	Avicennia schaueriana	23.9975	1678.77	51.8615	51.9748	14.4081	365	365	36.394	219.119	218.86
AsGPM032	GPM	-22.6989	-43.0015	Avicennia schaueriana	23.9975	1678.77	51.8615	51.9748	14.4081	365	365	36.394	219.119	218.86
AsUBA004	UBA	-23.49	-45.163	Avicennia schaueriana	21.793	2034.56	41.0499	40.5661	9.73566	365	365	36.0675	223.613	218.86
AsUBA005	UBA	-23.49	-45.163	Avicennia schaueriana	21.793	2034.56	41.0499	40.5661	9.73566	365	365	36.0675	223.613	218.86
AsUBA006	UBA	-23.49	-45.163	Avicennia schaueriana	21.793	2034.56	41.0499	40.5661	9.73566	365	365	36.0675	223.613	218.86
AsUBA010	UBA	-23.49	-45.163	Avicennia schaueriana	21.793	2034.56	41.0499	40.5661	9.73566	365	365	36.0675	223.613	218.86
AsUBA013	UBA	-23.49	-45.163	Avicennia schaueriana	21.793	2034.56	41.0499	40.5661	9.73566	365	365	36.0675	223.613	218.86
AsUBA019	UBA	-23.49	-45.163	Avicennia schaueriana	21.793	2034.56	41.0499	40.5661	9.73566	365	365	36.0675	223.613	218.86
AsUBA020	UBA	-23.49	-45.163	Avicennia schaueriana	21.793	2034.56	41.0499	40.5661	9.73566	365	365	36.0675	223.613	218.86
AsUBA025	UBA	-23.49	-45.163	Avicennia schaueriana	21.793	2034.56	41.0499	40.5661	9.73566	365	365	36.0675	223.613	218.86
AsUBA031	UBA	-23.49	-45.163	Avicennia schaueriana	21.793	2034.56	41.0499	40.5661	9.73566	365	365	36.0675	223.613	218.86
AsCNN002	CNN	-24.8971	-47.8472	Avicennia schaueriana	21.8603	2251.25	42.793	36.2718	11.7855	365	365	34.922	220.006	77.32
AsCNN003	CNN	-24.8971	-47.8472	Avicennia schaueriana	21.8603	2251.25	42.793	36.2718	11.7855	365	365	34.922	220.006	77.32
AsCNN011	CNN	-24.8971	-47.8472	Avicennia schaueriana	21.8603	2251.25	42.793	36.2718	11.7855	365	365	34.922	220.006	77.32
AsCNN014	CNN	-24.8971	-47.8472	Avicennia schaueriana	21.8603	2251.25	42.793	36.2718	11.7855	365	365	34.922	220.006	77.32
AsCNN020	CNN	-24.8971	-47.8472	Avicennia schaueriana	21.8603	2251.25	42.793	36.2718	11.7855	365	365	34.922	220.006	77.32
AsCNN023	CNN	-24.8971	-47.8472	Avicennia schaueriana	21.8603	2251.25	42.793	36.2718	11.7855	365	365	34.922	220.006	77.32
AsCNN024	CNN	-24.8971	-47.8472	Avicennia schaueriana	21.8603	2251.25	42.793	36.2718	11.7855	365	365	34.922	220.006	77.32
AsCNN027	CNN	-24.8971	-47.8472	Avicennia schaueriana	21.8603	2251.25	42.793	36.2718	11.7855	365	365	34.922	220.006	77.32
AsPPR011	PPR	-25.575	-48.3525	Avicennia schaueriana	22	2255.94	38.9439	26.4	10.5951	365	365	35.1877	219.952	77.32
AsPPR012	PPR	-25.575	-48.3525	Avicennia schaueriana	22	2255.94	38.9439	26.4	10.5951	365	365	35.1877	219.952	77.32
AsPPR013	PPR	-25.575	-48.3525	Avicennia schaueriana	22	2255.94	38.9439	26.4	10.5951	365	365	35.1877	219.952	77.32
AsPPR015	PPR	-25.575	-48.3525	Avicennia schaueriana	22	2255.94	38.9439	26.4	10.5951	365	365	35.1877	219.952	77.32
AsPPR016	PPR	-25.575	-48.3525	Avicennia schaueriana	22	2255.94	38.9439	26.4	10.5951	365	365	35.1877	219.952	77.32
AsPPR018	PPR	-25.575	-48.3525	Avicennia schaueriana	22	2255.94	38.9439	26.4	10.5951	365	365	35.1877	219.952	77.32
AsPPR019	PPR	-25.575	-48.3525	Avicennia schaueriana	22	2255.94	38.9439	26.4	10.5951	365	365	35.1877	219.952	77.32
AsPPR022	PPR	-25.575	-48.3525	Avicennia schaueriana	22	2255.94	38.9439	26.4	10.5951	365	365	35.1877	219.952	77.32
AsFLN019	FLN	-27.5678	-48.5189	Avicennia schaueriana	20.7976	1710.2	30.2048	35.7084	13.2386	365	365	35.0087	224.024	164.47
AsFLN020	FLN	-27.5678	-48.5189	Avicennia schaueriana	20.7976	1710.2	30.2048	35.7084	13.2386	365	365	35.0087	224.024	164.47
AsFLN028	FLN	-27.5678	-48.5189	Avicennia schaueriana	20.7976	1710.2	30.2048	35.7084	13.2386	365	365	35.0087	224.024	164.47
AsFLN033	FLN	-27.5678	-48.5189	Avicennia schaueriana	20.7976	1710.2	30.2048	35.7084	13.2386	365	365	35.0087	224.024	164.47
AsFLN062	FLN	-27.5678	-48.5189	Avicennia schaueriana	20.7976	1710.2	30.2048	35.7084	13.2386	365	365	35.0087	224.024	164.47
AsFLN065	FLN	-27.5678	-48.5189	Avicennia schaueriana	20.7976	1710.2	30.2048	35.7084	13.2386	365	365	35.0087	224.024	164.47
AsFLN075	FLN	-27.5678	-48.5189	Avicennia schaueriana	20.7976	1710.2	30.2048	35.7084	13.2386	365	365	35.0087	224.024	164.47
AsLGN002	LGN	-28.4846	-48.8424	Avicennia schaueriana	20.0788	1495.8	16.5418	32.3508	12.6372	365	365	34.9401	226.834	164.47
AsLGN003	LGN	-28.4846	-48.8424	Avicennia schaueriana	20.0788	1495.8	16.5418	32.3508	12.6372	365	365	34.9401	226.834	164.47
AsLGN004	LGN	-28.4846	-48.8424	Avicennia schaueriana	20.0788	1495.8	16.5418	32.3508	12.6372	365	365	34.9401	226.834	164.47
