# Supplementary material for: Differential Adaptive Potential and Vulnerability to Climate-Driven Habitat Loss in Brazilian Mangroves
Source: Frontiers journal article supplement (doi:10.3389/fcosc.2022.763325), 2022-03-22
Supplement: Table_2.XLSX [file Table_2.XLSX]

## Sheet: Table_S2.csv
Species	Population	2000 forest cover (cell count)	2000 forest cover (km2)	Year	Area lost (cell count)	Area remaining (cell count)	Area remaining (%)	Loss since last year (%)	Loss variation	Mean annual loss (%)	Total loss (cell count)	Total loss (km2)	Total loss (%)
Avicennia germinans	ALC	95792	86.2128	2001	203	95589	99.7881	0.211917	-	0.353564	6556	5.9004	6.844
Avicennia germinans	ALC	95792	86.2128	2002	208	95381	99.5709	0.217598	0.00568077	0.353564	6556	5.9004	6.844
Avicennia germinans	ALC	95792	86.2128	2003	149	95232	99.4154	0.156216	-0.0613827	0.353564	6556	5.9004	6.844
Avicennia germinans	ALC	95792	86.2128	2004	38	95194	99.3757	0.0399026	-0.116313	0.353564	6556	5.9004	6.844
Avicennia germinans	ALC	95792	86.2128	2005	96	95098	99.2755	0.100847	0.0609441	0.353564	6556	5.9004	6.844
Avicennia germinans	ALC	95792	86.2128	2006	305	94793	98.9571	0.320722	0.219875	0.353564	6556	5.9004	6.844
Avicennia germinans	ALC	95792	86.2128	2007	208	94585	98.74	0.219425	-0.101296	0.353564	6556	5.9004	6.844
Avicennia germinans	ALC	95792	86.2128	2008	258	94327	98.4706	0.272771	0.053345	0.353564	6556	5.9004	6.844
Avicennia germinans	ALC	95792	86.2128	2009	265	94062	98.194	0.280938	0.00816707	0.353564	6556	5.9004	6.844
Avicennia germinans	ALC	95792	86.2128	2010	383	93679	97.7942	0.407178	0.126241	0.353564	6556	5.9004	6.844
Avicennia germinans	ALC	95792	86.2128	2011	190	93489	97.5958	0.20282	-0.204358	0.353564	6556	5.9004	6.844
Avicennia germinans	ALC	95792	86.2128	2012	264	93225	97.3202	0.282386	0.0795659	0.353564	6556	5.9004	6.844
Avicennia germinans	ALC	95792	86.2128	2013	88	93137	97.2284	0.0943953	-0.187991	0.353564	6556	5.9004	6.844
Avicennia germinans	ALC	95792	86.2128	2014	390	92747	96.8212	0.418738	0.324343	0.353564	6556	5.9004	6.844
Avicennia germinans	ALC	95792	86.2128	2015	183	92564	96.6302	0.197311	-0.221427	0.353564	6556	5.9004	6.844
Avicennia germinans	ALC	95792	86.2128	2016	594	91970	96.0101	0.641718	0.444407	0.353564	6556	5.9004	6.844
Avicennia germinans	ALC	95792	86.2128	2017	726	91244	95.2522	0.789388	0.14767	0.353564	6556	5.9004	6.844
Avicennia germinans	ALC	95792	86.2128	2018	735	90509	94.4849	0.805532	0.0161446	0.353564	6556	5.9004	6.844
Avicennia germinans	ALC	95792	86.2128	2019	649	89860	93.8074	0.717056	-0.0884767	0.353564	6556	5.9004	6.844
Avicennia germinans	ALC	95792	86.2128	2020	624	89236	93.156	0.694414	-0.0226422	0.353564	6556	5.9004	6.844
Avicennia germinans	MRJ	59208	53.2872	2001	227	58981	99.6166	0.383394	-	0.709702	7874	7.0866	13.2989
Avicennia germinans	MRJ	59208	53.2872	2002	180	58801	99.3126	0.305183	-0.0782111	0.709702	7874	7.0866	13.2989
Avicennia germinans	MRJ	59208	53.2872	2003	123	58678	99.1049	0.20918	-0.0960029	0.709702	7874	7.0866	13.2989
Avicennia germinans	MRJ	59208	53.2872	2004	445	58233	98.3533	0.758376	0.549196	0.709702	7874	7.0866	13.2989
Avicennia germinans	MRJ	59208	53.2872	2005	258	57975	97.9175	0.443048	-0.315328	0.709702	7874	7.0866	13.2989
Avicennia germinans	MRJ	59208	53.2872	2006	503	57472	97.068	0.867615	0.424568	0.709702	7874	7.0866	13.2989
Avicennia germinans	MRJ	59208	53.2872	2007	384	57088	96.4194	0.668151	-0.199464	0.709702	7874	7.0866	13.2989
Avicennia germinans	MRJ	59208	53.2872	2008	105	56983	96.2421	0.183927	-0.484225	0.709702	7874	7.0866	13.2989
Avicennia germinans	MRJ	59208	53.2872	2009	318	56665	95.705	0.558061	0.374135	0.709702	7874	7.0866	13.2989
Avicennia germinans	MRJ	59208	53.2872	2010	377	56288	95.0682	0.665314	0.107253	0.709702	7874	7.0866	13.2989
Avicennia germinans	MRJ	59208	53.2872	2011	133	56155	94.8436	0.236285	-0.429029	0.709702	7874	7.0866	13.2989
Avicennia germinans	MRJ	59208	53.2872	2012	231	55924	94.4535	0.411361	0.175077	0.709702	7874	7.0866	13.2989
Avicennia germinans	MRJ	59208	53.2872	2013	244	55680	94.0413	0.436306	0.024945	0.709702	7874	7.0866	13.2989
Avicennia germinans	MRJ	59208	53.2872	2014	157	55523	93.7762	0.281968	-0.154338	0.709702	7874	7.0866	13.2989
Avicennia germinans	MRJ	59208	53.2872	2015	436	55087	93.0398	0.78526	0.503292	0.709702	7874	7.0866	13.2989
Avicennia germinans	MRJ	59208	53.2872	2016	477	54610	92.2342	0.865903	0.0806429	0.709702	7874	7.0866	13.2989
Avicennia germinans	MRJ	59208	53.2872	2017	628	53982	91.1735	1.14997	0.28407	0.709702	7874	7.0866	13.2989
Avicennia germinans	MRJ	59208	53.2872	2018	905	53077	89.645	1.67648	0.526512	0.709702	7874	7.0866	13.2989
Avicennia germinans	MRJ	59208	53.2872	2019	1170	51907	87.6689	2.20434	0.52786	0.709702	7874	7.0866	13.2989
Avicennia germinans	MRJ	59208	53.2872	2020	573	51334	86.7011	1.1039	-1.10045	0.709702	7874	7.0866	13.2989
Avicennia germinans	PAb	194675	175.207	2001	47	194628	99.9759	0.0241428	-	0.12552	4838	4.3542	2.48517
Avicennia germinans	PAb	194675	175.207	2002	77	194551	99.9363	0.0395627	0.0154199	0.12552	4838	4.3542	2.48517
Avicennia germinans	PAb	194675	175.207	2003	8	194543	99.9322	0.00411203	-0.0354506	0.12552	4838	4.3542	2.48517
Avicennia germinans	PAb	194675	175.207	2004	37	194506	99.9132	0.0190189	0.0149069	0.12552	4838	4.3542	2.48517
Avicennia germinans	PAb	194675	175.207	2005	170	194336	99.8259	0.0874009	0.068382	0.12552	4838	4.3542	2.48517
Avicennia germinans	PAb	194675	175.207	2006	140	194196	99.7539	0.0720402	-0.0153607	0.12552	4838	4.3542	2.48517
Avicennia germinans	PAb	194675	175.207	2007	33	194163	99.737	0.0169931	-0.055047	0.12552	4838	4.3542	2.48517
Avicennia germinans	PAb	194675	175.207	2008	27	194136	99.7231	0.0139058	-0.0030873	0.12552	4838	4.3542	2.48517
Avicennia germinans	PAb	194675	175.207	2009	41	194095	99.7021	0.0211192	0.00721337	0.12552	4838	4.3542	2.48517
Avicennia germinans	PAb	194675	175.207	2010	300	193795	99.548	0.154563	0.133444	0.12552	4838	4.3542	2.48517
Avicennia germinans	PAb	194675	175.207	2011	27	193768	99.5341	0.0139322	-0.140631	0.12552	4838	4.3542	2.48517
Avicennia germinans	PAb	194675	175.207	2012	62	193706	99.5022	0.031997	0.0180648	0.12552	4838	4.3542	2.48517
Avicennia germinans	PAb	194675	175.207	2013	71	193635	99.4658	0.0366535	0.00465646	0.12552	4838	4.3542	2.48517
Avicennia germinans	PAb	194675	175.207	2014	166	193469	99.3805	0.0857283	0.0490748	0.12552	4838	4.3542	2.48517
Avicennia germinans	PAb	194675	175.207	2015	64	193405	99.3476	0.0330802	-0.0526481	0.12552	4838	4.3542	2.48517
Avicennia germinans	PAb	194675	175.207	2016	1109	192296	98.778	0.573408	0.540328	0.12552	4838	4.3542	2.48517
Avicennia germinans	PAb	194675	175.207	2017	1657	190639	97.9268	0.861692	0.288284	0.12552	4838	4.3542	2.48517
Avicennia germinans	PAb	194675	175.207	2018	187	190452	97.8307	0.0980912	-0.763601	0.12552	4838	4.3542	2.48517
Avicennia germinans	PAb	194675	175.207	2019	27	190425	97.8169	0.0141768	-0.0839144	0.12552	4838	4.3542	2.48517
Avicennia germinans	PAb	194675	175.207	2020	588	189837	97.5148	0.308783	0.294606	0.12552	4838	4.3542	2.48517
Avicennia germinans	PNB	19492	17.5428	2001	12	19480	99.9384	0.0615637	-	0.460835	1630	1.467	8.36241
Avicennia germinans	PNB	19492	17.5428	2002	14	19466	99.8666	0.0718686	0.0103049	0.460835	1630	1.467	8.36241
Avicennia germinans	PNB	19492	17.5428	2003	8	19458	99.8256	0.0410973	-0.0307713	0.460835	1630	1.467	8.36241
Avicennia germinans	PNB	19492	17.5428	2004	48	19410	99.5793	0.246685	0.205588	0.460835	1630	1.467	8.36241
Avicennia germinans	PNB	19492	17.5428	2005	34	19376	99.4049	0.175167	-0.0715177	0.460835	1630	1.467	8.36241
Avicennia germinans	PNB	19492	17.5428	2006	2	19374	99.3946	0.010322	-0.164845	0.460835	1630	1.467	8.36241
Avicennia germinans	PNB	19492	17.5428	2007	74	19300	99.015	0.381955	0.371633	0.460835	1630	1.467	8.36241
Avicennia germinans	PNB	19492	17.5428	2008	44	19256	98.7892	0.227979	-0.153976	0.460835	1630	1.467	8.36241
Avicennia germinans	PNB	19492	17.5428	2009	37	19219	98.5994	0.192148	-0.0358314	0.460835	1630	1.467	8.36241
Avicennia germinans	PNB	19492	17.5428	2010	70	19149	98.2403	0.364223	0.172075	0.460835	1630	1.467	8.36241
Avicennia germinans	PNB	19492	17.5428	2011	6	19143	98.2095	0.0313332	-0.33289	0.460835	1630	1.467	8.36241
Avicennia germinans	PNB	19492	17.5428	2012	137	19006	97.5067	0.715666	0.684333	0.460835	1630	1.467	8.36241
Avicennia germinans	PNB	19492	17.5428	2013	110	18896	96.9423	0.578765	-0.136902	0.460835	1630	1.467	8.36241
Avicennia germinans	PNB	19492	17.5428	2014	77	18819	96.5473	0.407494	-0.171271	0.460835	1630	1.467	8.36241
Avicennia germinans	PNB	19492	17.5428	2015	314	18505	94.9364	1.66853	1.26103	0.460835	1630	1.467	8.36241
Avicennia germinans	PNB	19492	17.5428	2016	193	18312	93.9462	1.04296	-0.625565	0.460835	1630	1.467	8.36241
Avicennia germinans	PNB	19492	17.5428	2017	98	18214	93.4435	0.535168	-0.507793	0.460835	1630	1.467	8.36241
Avicennia germinans	PNB	19492	17.5428	2019	165	18049	92.597	0.905897	0.370728	0.460835	1630	1.467	8.36241
Avicennia germinans	PNB	19492	17.5428	2020	18	18031	92.5046	0.0997285	-0.806168	0.460835	1630	1.467	8.36241
Avicennia germinans	PRC	11590	10.431	2001	169	11421	98.5418	1.45815	-	13.4728	11220	10.098	96.8076
Avicennia germinans	PRC	11590	10.431	2002	284	11137	96.0915	2.48665	1.02849	13.4728	11220	10.098	96.8076
Avicennia germinans	PRC	11590	10.431	2003	156	10981	94.7455	1.40074	-1.08591	13.4728	11220	10.098	96.8076
Avicennia germinans	PRC	11590	10.431	2004	752	10229	88.2571	6.84819	5.44746	13.4728	11220	10.098	96.8076
Avicennia germinans	PRC	11590	10.431	2005	186	10043	86.6523	1.81836	-5.02983	13.4728	11220	10.098	96.8076
Avicennia germinans	PRC	11590	10.431	2006	795	9248	79.7929	7.91596	6.0976	13.4728	11220	10.098	96.8076
Avicennia germinans	PRC	11590	10.431	2007	172	9076	78.3089	1.85986	-6.0561	13.4728	11220	10.098	96.8076
Avicennia germinans	PRC	11590	10.431	2008	444	8632	74.478	4.89202	3.03216	13.4728	11220	10.098	96.8076
Avicennia germinans	PRC	11590	10.431	2009	358	8274	71.3891	4.14736	-0.744664	13.4728	11220	10.098	96.8076
Avicennia germinans	PRC	11590	10.431	2010	269	8005	69.0682	3.25115	-0.89621	13.4728	11220	10.098	96.8076
Avicennia germinans	PRC	11590	10.431	2011	78	7927	68.3952	0.974391	-2.27676	13.4728	11220	10.098	96.8076
Avicennia germinans	PRC	11590	10.431	2012	920	7007	60.4573	11.6059	10.6315	13.4728	11220	10.098	96.8076
Avicennia germinans	PRC	11590	10.431	2013	402	6605	56.9888	5.73712	-5.86878	13.4728	11220	10.098	96.8076
Avicennia germinans	PRC	11590	10.431	2014	1016	5589	48.2226	15.3823	9.64517	13.4728	11220	10.098	96.8076
Avicennia germinans	PRC	11590	10.431	2015	1516	4073	35.1424	27.1247	11.7424	13.4728	11220	10.098	96.8076
Avicennia germinans	PRC	11590	10.431	2016	763	3310	28.5591	18.7331	-8.39159	13.4728	11220	10.098	96.8076
Avicennia germinans	PRC	11590	10.431	2017	631	2679	23.1148	19.0634	0.330324	13.4728	11220	10.098	96.8076
Avicennia germinans	PRC	11590	10.431	2018	993	1686	14.547	37.0661	18.0026	13.4728	11220	10.098	96.8076
Avicennia germinans	PRC	11590	10.431	2019	1170	516	4.45211	69.395	32.3289	13.4728	11220	10.098	96.8076
Avicennia germinans	PRC	11590	10.431	2020	146	370	3.19241	28.2946	-41.1004	13.4728	11220	10.098	96.8076
Avicennia germinans	TMD	56792	51.1128	2001	343	56449	99.396	0.603958	-	0.488977	5319	4.7871	9.36576
Avicennia germinans	TMD	56792	51.1128	2002	337	56112	98.8026	0.596999	-0.00695924	0.488977	5319	4.7871	9.36576
Avicennia germinans	TMD	56792	51.1128	2003	204	55908	98.4434	0.363559	-0.23344	0.488977	5319	4.7871	9.36576
Avicennia germinans	TMD	56792	51.1128	2004	1	55907	98.4417	0.00178865	-0.36177	0.488977	5319	4.7871	9.36576
Avicennia germinans	TMD	56792	51.1128	2005	144	55763	98.1881	0.257571	0.255782	0.488977	5319	4.7871	9.36576
Avicennia germinans	TMD	56792	51.1128	2006	191	55572	97.8518	0.342521	0.0849504	0.488977	5319	4.7871	9.36576
Avicennia germinans	TMD	56792	51.1128	2007	857	54715	96.3428	1.54214	1.19962	0.488977	5319	4.7871	9.36576
Avicennia germinans	TMD	56792	51.1128	2008	406	54309	95.6279	0.742027	-0.800117	0.488977	5319	4.7871	9.36576
Avicennia germinans	TMD	56792	51.1128	2009	282	54027	95.1314	0.519251	-0.222776	0.488977	5319	4.7871	9.36576
Avicennia germinans	TMD	56792	51.1128	2010	252	53775	94.6876	0.466433	-0.0528175	0.488977	5319	4.7871	9.36576
Avicennia germinans	TMD	56792	51.1128	2011	249	53526	94.2492	0.46304	-0.003393	0.488977	5319	4.7871	9.36576
Avicennia germinans	TMD	56792	51.1128	2012	1239	52287	92.0675	2.31476	1.85172	0.488977	5319	4.7871	9.36576
Avicennia germinans	TMD	56792	51.1128	2013	371	51916	91.4143	0.709545	-1.60522	0.488977	5319	4.7871	9.36576
Avicennia germinans	TMD	56792	51.1128	2014	199	51717	91.0639	0.383312	-0.326234	0.488977	5319	4.7871	9.36576
Avicennia germinans	TMD	56792	51.1128	2015	26	51691	91.0181	0.0502736	-0.333038	0.488977	5319	4.7871	9.36576
Avicennia germinans	TMD	56792	51.1128	2016	50	51641	90.9301	0.0967286	0.046455	0.488977	5319	4.7871	9.36576
Avicennia germinans	TMD	56792	51.1128	2017	101	51540	90.7522	0.195581	0.0988524	0.488977	5319	4.7871	9.36576
Avicennia germinans	TMD	56792	51.1128	2018	43	51497	90.6765	0.0834303	-0.112151	0.488977	5319	4.7871	9.36576
Avicennia germinans	TMD	56792	51.1128	2019	20	51477	90.6413	0.0388372	-0.0445931	0.488977	5319	4.7871	9.36576
Avicennia germinans	TMD	56792	51.1128	2020	4	51473	90.6342	0.00777046	-0.0310668	0.488977	5319	4.7871	9.36576
Avicennia schaueriana	ALC	95792	86.2128	2001	203	95589	99.7881	0.211917	-	0.353564	6556	5.9004	6.844
Avicennia schaueriana	ALC	95792	86.2128	2002	208	95381	99.5709	0.217598	0.00568077	0.353564	6556	5.9004	6.844
Avicennia schaueriana	ALC	95792	86.2128	2003	149	95232	99.4154	0.156216	-0.0613827	0.353564	6556	5.9004	6.844
Avicennia schaueriana	ALC	95792	86.2128	2004	38	95194	99.3757	0.0399026	-0.116313	0.353564	6556	5.9004	6.844
Avicennia schaueriana	ALC	95792	86.2128	2005	96	95098	99.2755	0.100847	0.0609441	0.353564	6556	5.9004	6.844
Avicennia schaueriana	ALC	95792	86.2128	2006	305	94793	98.9571	0.320722	0.219875	0.353564	6556	5.9004	6.844
Avicennia schaueriana	ALC	95792	86.2128	2007	208	94585	98.74	0.219425	-0.101296	0.353564	6556	5.9004	6.844
Avicennia schaueriana	ALC	95792	86.2128	2008	258	94327	98.4706	0.272771	0.053345	0.353564	6556	5.9004	6.844
Avicennia schaueriana	ALC	95792	86.2128	2009	265	94062	98.194	0.280938	0.00816707	0.353564	6556	5.9004	6.844
Avicennia schaueriana	ALC	95792	86.2128	2010	383	93679	97.7942	0.407178	0.126241	0.353564	6556	5.9004	6.844
Avicennia schaueriana	ALC	95792	86.2128	2011	190	93489	97.5958	0.20282	-0.204358	0.353564	6556	5.9004	6.844
Avicennia schaueriana	ALC	95792	86.2128	2012	264	93225	97.3202	0.282386	0.0795659	0.353564	6556	5.9004	6.844
Avicennia schaueriana	ALC	95792	86.2128	2013	88	93137	97.2284	0.0943953	-0.187991	0.353564	6556	5.9004	6.844
Avicennia schaueriana	ALC	95792	86.2128	2014	390	92747	96.8212	0.418738	0.324343	0.353564	6556	5.9004	6.844
Avicennia schaueriana	ALC	95792	86.2128	2015	183	92564	96.6302	0.197311	-0.221427	0.353564	6556	5.9004	6.844
Avicennia schaueriana	ALC	95792	86.2128	2016	594	91970	96.0101	0.641718	0.444407	0.353564	6556	5.9004	6.844
Avicennia schaueriana	ALC	95792	86.2128	2017	726	91244	95.2522	0.789388	0.14767	0.353564	6556	5.9004	6.844
Avicennia schaueriana	ALC	95792	86.2128	2018	735	90509	94.4849	0.805532	0.0161446	0.353564	6556	5.9004	6.844
Avicennia schaueriana	ALC	95792	86.2128	2019	649	89860	93.8074	0.717056	-0.0884767	0.353564	6556	5.9004	6.844
Avicennia schaueriana	ALC	95792	86.2128	2020	624	89236	93.156	0.694414	-0.0226422	0.353564	6556	5.9004	6.844
Avicennia schaueriana	CNN	272496	245.246	2001	5	272491	99.9982	0.00183489	-	0.0247326	1345	1.2105	0.493585
Avicennia schaueriana	CNN	272496	245.246	2002	2	272489	99.9974	0.000733969	-0.00110092	0.0247326	1345	1.2105	0.493585
Avicennia schaueriana	CNN	272496	245.246	2003	10	272479	99.9938	0.00366987	0.0029359	0.0247326	1345	1.2105	0.493585
Avicennia schaueriana	CNN	272496	245.246	2004	14	272465	99.9886	0.00513801	0.00146814	0.0247326	1345	1.2105	0.493585
Avicennia schaueriana	CNN	272496	245.246	2005	15	272450	99.9831	0.00550529	0.000367284	0.0247326	1345	1.2105	0.493585
Avicennia schaueriana	CNN	272496	245.246	2006	29	272421	99.9725	0.0106442	0.00513886	0.0247326	1345	1.2105	0.493585
Avicennia schaueriana	CNN	272496	245.246	2007	139	272282	99.9215	0.051024	0.0403798	0.0247326	1345	1.2105	0.493585
Avicennia schaueriana	CNN	272496	245.246	2008	7	272275	99.9189	0.00257086	-0.0484531	0.0247326	1345	1.2105	0.493585
Avicennia schaueriana	CNN	272496	245.246	2009	13	272262	99.9141	0.00477458	0.00220372	0.0247326	1345	1.2105	0.493585
Avicennia schaueriana	CNN	272496	245.246	2010	12	272250	99.9097	0.00440752	-0.000367065	0.0247326	1345	1.2105	0.493585
Avicennia schaueriana	CNN	272496	245.246	2011	11	272239	99.9057	0.0040404	-0.000367115	0.0247326	1345	1.2105	0.493585
Avicennia schaueriana	CNN	272496	245.246	2012	65	272174	99.8818	0.0238761	0.0198357	0.0247326	1345	1.2105	0.493585
Avicennia schaueriana	CNN	272496	245.246	2013	125	272049	99.836	0.0459265	0.0220504	0.0247326	1345	1.2105	0.493585
Avicennia schaueriana	CNN	272496	245.246	2014	130	271919	99.7883	0.0477855	0.00185901	0.0247326	1345	1.2105	0.493585
Avicennia schaueriana	CNN	272496	245.246	2015	121	271798	99.7438	0.0444985	-0.00328696	0.0247326	1345	1.2105	0.493585
Avicennia schaueriana	CNN	272496	245.246	2016	61	271737	99.7215	0.0224431	-0.0220554	0.0247326	1345	1.2105	0.493585
Avicennia schaueriana	CNN	272496	245.246	2017	342	271395	99.596	0.125857	0.103414	0.0247326	1345	1.2105	0.493585
Avicennia schaueriana	CNN	272496	245.246	2018	7	271388	99.5934	0.00257927	-0.123278	0.0247326	1345	1.2105	0.493585
Avicennia schaueriana	CNN	272496	245.246	2019	52	271336	99.5743	0.0191608	0.0165815	0.0247326	1345	1.2105	0.493585
Avicennia schaueriana	CNN	272496	245.246	2020	185	271151	99.5064	0.0681811	0.0490204	0.0247326	1345	1.2105	0.493585
Avicennia schaueriana	FLN	118474	106.627	2001	94	118380	99.9207	0.0793423	-	0.132988	3114	2.8026	2.62842
Avicennia schaueriana	FLN	118474	106.627	2002	97	118283	99.8388	0.0819395	0.00259721	0.132988	3114	2.8026	2.62842
Avicennia schaueriana	FLN	118474	106.627	2003	129	118154	99.7299	0.10906	0.027121	0.132988	3114	2.8026	2.62842
Avicennia schaueriana	FLN	118474	106.627	2004	203	117951	99.5586	0.17181	0.0627492	0.132988	3114	2.8026	2.62842
Avicennia schaueriana	FLN	118474	106.627	2005	654	117297	99.0065	0.554468	0.382658	0.132988	3114	2.8026	2.62842
Avicennia schaueriana	FLN	118474	106.627	2006	275	117022	98.7744	0.234448	-0.32002	0.132988	3114	2.8026	2.62842
Avicennia schaueriana	FLN	118474	106.627	2007	50	116972	98.7322	0.042727	-0.191721	0.132988	3114	2.8026	2.62842
Avicennia schaueriana	FLN	118474	106.627	2008	138	116834	98.6157	0.117977	0.0752499	0.132988	3114	2.8026	2.62842
Avicennia schaueriana	FLN	118474	106.627	2009	46	116788	98.5769	0.0393721	-0.0786049	0.132988	3114	2.8026	2.62842
Avicennia schaueriana	FLN	118474	106.627	2010	52	116736	98.533	0.0445251	0.00515302	0.132988	3114	2.8026	2.62842
Avicennia schaueriana	FLN	118474	106.627	2011	48	116688	98.4925	0.0411184	-0.0034067	0.132988	3114	2.8026	2.62842
Avicennia schaueriana	FLN	118474	106.627	2012	28	116660	98.4689	0.0239956	-0.0171228	0.132988	3114	2.8026	2.62842
Avicennia schaueriana	FLN	118474	106.627	2013	37	116623	98.4376	0.0317161	0.00772049	0.132988	3114	2.8026	2.62842
Avicennia schaueriana	FLN	118474	106.627	2014	85	116538	98.3659	0.0728844	0.0411683	0.132988	3114	2.8026	2.62842
Avicennia schaueriana	FLN	118474	106.627	2015	19	116519	98.3498	0.0163037	-0.0565807	0.132988	3114	2.8026	2.62842
Avicennia schaueriana	FLN	118474	106.627	2016	97	116422	98.268	0.0832482	0.0669445	0.132988	3114	2.8026	2.62842
Avicennia schaueriana	FLN	118474	106.627	2017	537	115885	97.8147	0.461253	0.378005	0.132988	3114	2.8026	2.62842
Avicennia schaueriana	FLN	118474	106.627	2018	46	115839	97.7759	0.0396945	-0.421559	0.132988	3114	2.8026	2.62842
Avicennia schaueriana	FLN	118474	106.627	2019	146	115693	97.6526	0.126037	0.0863425	0.132988	3114	2.8026	2.62842
Avicennia schaueriana	FLN	118474	106.627	2020	333	115360	97.3716	0.287831	0.161794	0.132988	3114	2.8026	2.62842
Avicennia schaueriana	GPM	116143	104.529	2001	234	115909	99.7985	0.201476	-	0.288363	6529	5.8761	5.62152
Avicennia schaueriana	GPM	116143	104.529	2002	104	115805	99.709	0.0897256	-0.11175	0.288363	6529	5.8761	5.62152
Avicennia schaueriana	GPM	116143	104.529	2003	45	115760	99.6702	0.0388584	-0.0508671	0.288363	6529	5.8761	5.62152
Avicennia schaueriana	GPM	116143	104.529	2004	55	115705	99.6229	0.0475121	0.00865367	0.288363	6529	5.8761	5.62152
Avicennia schaueriana	GPM	116143	104.529	2005	109	115596	99.529	0.0942051	0.046693	0.288363	6529	5.8761	5.62152
Avicennia schaueriana	GPM	116143	104.529	2006	82	115514	99.4584	0.0709367	-0.0232684	0.288363	6529	5.8761	5.62152
Avicennia schaueriana	GPM	116143	104.529	2007	120	115394	99.3551	0.103884	0.0329468	0.288363	6529	5.8761	5.62152
Avicennia schaueriana	GPM	116143	104.529	2008	59	115335	99.3043	0.0511292	-0.0527543	0.288363	6529	5.8761	5.62152
Avicennia schaueriana	GPM	116143	104.529	2009	371	114964	98.9849	0.321672	0.270542	0.288363	6529	5.8761	5.62152
Avicennia schaueriana	GPM	116143	104.529	2010	76	114888	98.9194	0.0661077	-0.255564	0.288363	6529	5.8761	5.62152
Avicennia schaueriana	GPM	116143	104.529	2011	121	114767	98.8153	0.10532	0.0392123	0.288363	6529	5.8761	5.62152
Avicennia schaueriana	GPM	116143	104.529	2012	143	114624	98.6921	0.1246	0.0192803	0.288363	6529	5.8761	5.62152
Avicennia schaueriana	GPM	116143	104.529	2013	802	113822	98.0016	0.699679	0.575079	0.288363	6529	5.8761	5.62152
Avicennia schaueriana	GPM	116143	104.529	2014	1151	112671	97.0106	1.01123	0.311549	0.288363	6529	5.8761	5.62152
Avicennia schaueriana	GPM	116143	104.529	2015	465	112206	96.6102	0.412706	-0.598522	0.288363	6529	5.8761	5.62152
Avicennia schaueriana	GPM	116143	104.529	2016	500	111706	96.1797	0.445609	0.0329029	0.288363	6529	5.8761	5.62152
Avicennia schaueriana	GPM	116143	104.529	2017	1318	110388	95.0449	1.17988	0.734274	0.288363	6529	5.8761	5.62152
Avicennia schaueriana	GPM	116143	104.529	2018	179	110209	94.8908	0.162155	-1.01773	0.288363	6529	5.8761	5.62152
Avicennia schaueriana	GPM	116143	104.529	2019	232	109977	94.691	0.210509	0.0483538	0.288363	6529	5.8761	5.62152
Avicennia schaueriana	GPM	116143	104.529	2020	363	109614	94.3785	0.330069	0.11956	0.288363	6529	5.8761	5.62152
Avicennia schaueriana	LGN	32784	29.5056	2001	368	32416	98.8775	1.1225	-	1.27237	7448	6.7032	22.7184
Avicennia schaueriana	LGN	32784	29.5056	2002	112	32304	98.5359	0.345508	-0.77699	1.27237	7448	6.7032	22.7184
Avicennia schaueriana	LGN	32784	29.5056	2003	128	32176	98.1454	0.396236	0.0507274	1.27237	7448	6.7032	22.7184
Avicennia schaueriana	LGN	32784	29.5056	2004	143	32033	97.7092	0.444431	0.0481949	1.27237	7448	6.7032	22.7184
Avicennia schaueriana	LGN	32784	29.5056	2005	153	31880	97.2426	0.477632	0.0332018	1.27237	7448	6.7032	22.7184
Avicennia schaueriana	LGN	32784	29.5056	2006	225	31655	96.5562	0.705772	0.228139	1.27237	7448	6.7032	22.7184
Avicennia schaueriana	LGN	32784	29.5056	2007	75	31580	96.3275	0.236929	-0.468842	1.27237	7448	6.7032	22.7184
Avicennia schaueriana	LGN	32784	29.5056	2008	135	31445	95.9157	0.427486	0.190556	1.27237	7448	6.7032	22.7184
Avicennia schaueriana	LGN	32784	29.5056	2009	59	31386	95.7357	0.187629	-0.239857	1.27237	7448	6.7032	22.7184
Avicennia schaueriana	LGN	32784	29.5056	2010	99	31287	95.4337	0.315427	0.127798	1.27237	7448	6.7032	22.7184
Avicennia schaueriana	LGN	32784	29.5056	2011	94	31193	95.147	0.300444	-0.014983	1.27237	7448	6.7032	22.7184
Avicennia schaueriana	LGN	32784	29.5056	2012	172	31021	94.6224	0.551406	0.250961	1.27237	7448	6.7032	22.7184
Avicennia schaueriana	LGN	32784	29.5056	2013	815	30206	92.1364	2.62725	2.07585	1.27237	7448	6.7032	22.7184
Avicennia schaueriana	LGN	32784	29.5056	2014	474	29732	90.6906	1.56922	-1.05803	1.27237	7448	6.7032	22.7184
Avicennia schaueriana	LGN	32784	29.5056	2015	240	29492	89.9585	0.807211	-0.762014	1.27237	7448	6.7032	22.7184
Avicennia schaueriana	LGN	32784	29.5056	2016	820	28672	87.4573	2.78042	1.9732	1.27237	7448	6.7032	22.7184
Avicennia schaueriana	LGN	32784	29.5056	2017	1390	27282	83.2174	4.84794	2.06752	1.27237	7448	6.7032	22.7184
Avicennia schaueriana	LGN	32784	29.5056	2018	469	26813	81.7868	1.71908	-3.12885	1.27237	7448	6.7032	22.7184
Avicennia schaueriana	LGN	32784	29.5056	2019	859	25954	79.1667	3.20367	1.48459	1.27237	7448	6.7032	22.7184
Avicennia schaueriana	LGN	32784	29.5056	2020	618	25336	77.2816	2.38114	-0.822534	1.27237	7448	6.7032	22.7184
Avicennia schaueriana	PAR	82189	73.9701	2001	3	82186	99.9963	0.00365012	-	0.0811291	1327	1.1943	1.61457
Avicennia schaueriana	PAR	82189	73.9701	2002	17	82169	99.9757	0.0206848	0.0170347	0.0811291	1327	1.1943	1.61457
Avicennia schaueriana	PAR	82189	73.9701	2004	18	82151	99.9538	0.0219061	0.00122128	0.0811291	1327	1.1943	1.61457
Avicennia schaueriana	PAR	82189	73.9701	2005	113	82038	99.8163	0.137552	0.115646	0.0811291	1327	1.1943	1.61457
Avicennia schaueriana	PAR	82189	73.9701	2006	17	82021	99.7956	0.0207221	-0.116829	0.0811291	1327	1.1943	1.61457
Avicennia schaueriana	PAR	82189	73.9701	2007	33	81988	99.7554	0.0402336	0.0195115	0.0811291	1327	1.1943	1.61457
Avicennia schaueriana	PAR	82189	73.9701	2008	7	81981	99.7469	0.00853783	-0.0316958	0.0811291	1327	1.1943	1.61457
Avicennia schaueriana	PAR	82189	73.9701	2009	31	81950	99.7092	0.0378136	0.0292758	0.0811291	1327	1.1943	1.61457
Avicennia schaueriana	PAR	82189	73.9701	2010	67	81883	99.6277	0.0817572	0.0439435	0.0811291	1327	1.1943	1.61457
Avicennia schaueriana	PAR	82189	73.9701	2011	8	81875	99.618	0.00977004	-0.0719871	0.0811291	1327	1.1943	1.61457
Avicennia schaueriana	PAR	82189	73.9701	2012	18	81857	99.5961	0.0219847	0.0122147	0.0811291	1327	1.1943	1.61457
Avicennia schaueriana	PAR	82189	73.9701	2013	19	81838	99.5729	0.0232112	0.00122648	0.0811291	1327	1.1943	1.61457
Avicennia schaueriana	PAR	82189	73.9701	2014	70	81768	99.4878	0.0855348	0.0623236	0.0811291	1327	1.1943	1.61457
Avicennia schaueriana	PAR	82189	73.9701	2015	33	81735	99.4476	0.0403581	-0.0451768	0.0811291	1327	1.1943	1.61457
Avicennia schaueriana	PAR	82189	73.9701	2016	431	81304	98.9232	0.527314	0.486956	0.0811291	1327	1.1943	1.61457
Avicennia schaueriana	PAR	82189	73.9701	2017	128	81176	98.7675	0.157434	-0.36988	0.0811291	1327	1.1943	1.61457
Avicennia schaueriana	PAR	82189	73.9701	2018	47	81129	98.7103	0.0578989	-0.0995349	0.0811291	1327	1.1943	1.61457
Avicennia schaueriana	PAR	82189	73.9701	2019	22	81107	98.6835	0.0271173	-0.0307816	0.0811291	1327	1.1943	1.61457
Avicennia schaueriana	PAR	82189	73.9701	2020	227	80880	98.4073	0.279877	0.25276	0.0811291	1327	1.1943	1.61457
Avicennia schaueriana	PPR	93629	84.2661	2001	18	93611	99.9808	0.0192248	-	0.109812	858	0.7722	0.916383
Avicennia schaueriana	PPR	93629	84.2661	2002	6	93605	99.9744	0.0064095	-0.0128153	0.109812	858	0.7722	0.916383
Avicennia schaueriana	PPR	93629	84.2661	2003	6	93599	99.968	0.00640991	4.10844e-07	0.109812	858	0.7722	0.916383
Avicennia schaueriana	PPR	93629	84.2661	2004	3	93596	99.9648	0.00320516	-0.00320475	0.109812	858	0.7722	0.916383
Avicennia schaueriana	PPR	93629	84.2661	2005	7	93589	99.9573	0.00747895	0.00427379	0.109812	858	0.7722	0.916383
Avicennia schaueriana	PPR	93629	84.2661	2006	23	93566	99.9327	0.0245755	0.0170966	0.109812	858	0.7722	0.916383
Avicennia schaueriana	PPR	93629	84.2661	2007	11	93555	99.921	0.0117564	-0.0128191	0.109812	858	0.7722	0.916383
Avicennia schaueriana	PPR	93629	84.2661	2008	10	93545	99.9103	0.0106889	-0.00106751	0.109812	858	0.7722	0.916383
Avicennia schaueriana	PPR	93629	84.2661	2009	2	93543	99.9081	0.00213801	-0.00855089	0.109812	858	0.7722	0.916383
Avicennia schaueriana	PPR	93629	84.2661	2010	24	93519	99.8825	0.0256566	0.0235186	0.109812	858	0.7722	0.916383
Avicennia schaueriana	PPR	93629	84.2661	2011	10	93509	99.8718	0.010693	-0.0149636	0.109812	858	0.7722	0.916383
Avicennia schaueriana	PPR	93629	84.2661	2012	10	93499	99.8612	0.0106942	1.14353e-06	0.109812	858	0.7722	0.916383
Avicennia schaueriana	PPR	93629	84.2661	2013	45	93454	99.8131	0.0481289	0.0374347	0.109812	858	0.7722	0.916383
Avicennia schaueriana	PPR	93629	84.2661	2014	69	93385	99.7394	0.0738331	0.0257043	0.109812	858	0.7722	0.916383
Avicennia schaueriana	PPR	93629	84.2661	2015	41	93344	99.6956	0.0439043	-0.0299288	0.109812	858	0.7722	0.916383
Avicennia schaueriana	PPR	93629	84.2661	2016	37	93307	99.6561	0.0396383	-0.00426594	0.109812	858	0.7722	0.916383
Avicennia schaueriana	PPR	93629	84.2661	2017	257	93050	99.3816	0.275435	0.235797	0.109812	858	0.7722	0.916383
Avicennia schaueriana	PPR	93629	84.2661	2019	7	93043	99.3741	0.00752284	-0.267912	0.109812	858	0.7722	0.916383
Avicennia schaueriana	PPR	93629	84.2661	2020	103	92940	99.2641	0.110702	0.103179	0.109812	858	0.7722	0.916383
Avicennia schaueriana	PRC	11590	10.431	2001	169	11421	98.5418	1.45815	-	13.4728	11220	10.098	96.8076
Avicennia schaueriana	PRC	11590	10.431	2002	284	11137	96.0915	2.48665	1.02849	13.4728	11220	10.098	96.8076
Avicennia schaueriana	PRC	11590	10.431	2003	156	10981	94.7455	1.40074	-1.08591	13.4728	11220	10.098	96.8076
Avicennia schaueriana	PRC	11590	10.431	2004	752	10229	88.2571	6.84819	5.44746	13.4728	11220	10.098	96.8076
Avicennia schaueriana	PRC	11590	10.431	2005	186	10043	86.6523	1.81836	-5.02983	13.4728	11220	10.098	96.8076
Avicennia schaueriana	PRC	11590	10.431	2006	795	9248	79.7929	7.91596	6.0976	13.4728	11220	10.098	96.8076
Avicennia schaueriana	PRC	11590	10.431	2007	172	9076	78.3089	1.85986	-6.0561	13.4728	11220	10.098	96.8076
Avicennia schaueriana	PRC	11590	10.431	2008	444	8632	74.478	4.89202	3.03216	13.4728	11220	10.098	96.8076
Avicennia schaueriana	PRC	11590	10.431	2009	358	8274	71.3891	4.14736	-0.744664	13.4728	11220	10.098	96.8076
Avicennia schaueriana	PRC	11590	10.431	2010	269	8005	69.0682	3.25115	-0.89621	13.4728	11220	10.098	96.8076
Avicennia schaueriana	PRC	11590	10.431	2011	78	7927	68.3952	0.974391	-2.27676	13.4728	11220	10.098	96.8076
Avicennia schaueriana	PRC	11590	10.431	2012	920	7007	60.4573	11.6059	10.6315	13.4728	11220	10.098	96.8076
Avicennia schaueriana	PRC	11590	10.431	2013	402	6605	56.9888	5.73712	-5.86878	13.4728	11220	10.098	96.8076
Avicennia schaueriana	PRC	11590	10.431	2014	1016	5589	48.2226	15.3823	9.64517	13.4728	11220	10.098	96.8076
Avicennia schaueriana	PRC	11590	10.431	2015	1516	4073	35.1424	27.1247	11.7424	13.4728	11220	10.098	96.8076
Avicennia schaueriana	PRC	11590	10.431	2016	763	3310	28.5591	18.7331	-8.39159	13.4728	11220	10.098	96.8076
Avicennia schaueriana	PRC	11590	10.431	2017	631	2679	23.1148	19.0634	0.330324	13.4728	11220	10.098	96.8076
Avicennia schaueriana	PRC	11590	10.431	2018	993	1686	14.547	37.0661	18.0026	13.4728	11220	10.098	96.8076
Avicennia schaueriana	PRC	11590	10.431	2019	1170	516	4.45211	69.395	32.3289	13.4728	11220	10.098	96.8076
Avicennia schaueriana	PRC	11590	10.431	2020	146	370	3.19241	28.2946	-41.1004	13.4728	11220	10.098	96.8076
Avicennia schaueriana	UBA	229912	206.921	2001	32	229880	99.9861	0.0139184	-	0.0289779	1329	1.1961	0.578047
Avicennia schaueriana	UBA	229912	206.921	2002	32	229848	99.9722	0.0139203	1.93748e-06	0.0289779	1329	1.1961	0.578047
Avicennia schaueriana	UBA	229912	206.921	2003	101	229747	99.9282	0.0439421	0.0300218	0.0289779	1329	1.1961	0.578047
Avicennia schaueriana	UBA	229912	206.921	2004	25	229722	99.9174	0.0108815	-0.0330605	0.0289779	1329	1.1961	0.578047
Avicennia schaueriana	UBA	229912	206.921	2005	20	229702	99.9087	0.00870618	-0.00217536	0.0289779	1329	1.1961	0.578047
Avicennia schaueriana	UBA	229912	206.921	2006	26	229676	99.8974	0.011319	0.00261284	0.0289779	1329	1.1961	0.578047
Avicennia schaueriana	UBA	229912	206.921	2007	55	229621	99.8734	0.0239468	0.0126278	0.0289779	1329	1.1961	0.578047
Avicennia schaueriana	UBA	229912	206.921	2008	30	229591	99.8604	0.013065	-0.0108818	0.0289779	1329	1.1961	0.578047
Avicennia schaueriana	UBA	229912	206.921	2009	6	229585	99.8578	0.00261334	-0.0104517	0.0289779	1329	1.1961	0.578047
Avicennia schaueriana	UBA	229912	206.921	2010	86	229499	99.8204	0.0374589	0.0348456	0.0289779	1329	1.1961	0.578047
Avicennia schaueriana	UBA	229912	206.921	2011	7	229492	99.8173	0.00305012	-0.0344088	0.0289779	1329	1.1961	0.578047
Avicennia schaueriana	UBA	229912	206.921	2012	43	229449	99.7986	0.018737	0.0156869	0.0289779	1329	1.1961	0.578047
Avicennia schaueriana	UBA	229912	206.921	2013	76	229373	99.7656	0.0331228	0.0143858	0.0289779	1329	1.1961	0.578047
Avicennia schaueriana	UBA	229912	206.921	2014	143	229230	99.7034	0.0623439	0.029221	0.0289779	1329	1.1961	0.578047
Avicennia schaueriana	UBA	229912	206.921	2015	56	229174	99.679	0.0244296	-0.0379143	0.0289779	1329	1.1961	0.578047
Avicennia schaueriana	UBA	229912	206.921	2016	27	229147	99.6673	0.0117814	-0.0126482	0.0289779	1329	1.1961	0.578047
Avicennia schaueriana	UBA	229912	206.921	2017	296	228851	99.5385	0.129175	0.117393	0.0289779	1329	1.1961	0.578047
Avicennia schaueriana	UBA	229912	206.921	2018	47	228804	99.5181	0.0205374	-0.108637	0.0289779	1329	1.1961	0.578047
Avicennia schaueriana	UBA	229912	206.921	2019	73	228731	99.4863	0.031905	0.0113677	0.0289779	1329	1.1961	0.578047
Avicennia schaueriana	UBA	229912	206.921	2020	148	228583	99.422	0.0647048	0.0327998	0.0289779	1329	1.1961	0.578047
Avicennia schaueriana	VER	70697	63.6273	2001	222	70475	99.686	0.314016	-	0.785448	10322	9.2898	14.6003
Avicennia schaueriana	VER	70697	63.6273	2002	340	70135	99.2051	0.482441	0.168424	0.785448	10322	9.2898	14.6003
Avicennia schaueriana	VER	70697	63.6273	2003	215	69920	98.9009	0.306552	-0.175889	0.785448	10322	9.2898	14.6003
Avicennia schaueriana	VER	70697	63.6273	2004	639	69281	97.9971	0.913902	0.60735	0.785448	10322	9.2898	14.6003
Avicennia schaueriana	VER	70697	63.6273	2005	260	69021	97.6293	0.375283	-0.538618	0.785448	10322	9.2898	14.6003
Avicennia schaueriana	VER	70697	63.6273	2006	453	68568	96.9886	0.656322	0.281039	0.785448	10322	9.2898	14.6003
Avicennia schaueriana	VER	70697	63.6273	2007	387	68181	96.4412	0.564403	-0.0919188	0.785448	10322	9.2898	14.6003
Avicennia schaueriana	VER	70697	63.6273	2008	726	67455	95.4142	1.06481	0.50041	0.785448	10322	9.2898	14.6003
Avicennia schaueriana	VER	70697	63.6273	2009	287	67168	95.0083	0.425469	-0.639344	0.785448	10322	9.2898	14.6003
Avicennia schaueriana	VER	70697	63.6273	2010	654	66514	94.0832	0.973678	0.548209	0.785448	10322	9.2898	14.6003
Avicennia schaueriana	VER	70697	63.6273	2011	488	66026	93.3929	0.73368	-0.239998	0.785448	10322	9.2898	14.6003
Avicennia schaueriana	VER	70697	63.6273	2012	549	65477	92.6164	0.831491	0.0978105	0.785448	10322	9.2898	14.6003
Avicennia schaueriana	VER	70697	63.6273	2013	668	64809	91.6715	1.02021	0.188715	0.785448	10322	9.2898	14.6003
Avicennia schaueriana	VER	70697	63.6273	2014	459	64350	91.0222	0.708235	-0.311971	0.785448	10322	9.2898	14.6003
Avicennia schaueriana	VER	70697	63.6273	2015	512	63838	90.298	0.795649	0.0874138	0.785448	10322	9.2898	14.6003
Avicennia schaueriana	VER	70697	63.6273	2016	765	63073	89.2159	1.19835	0.402697	0.785448	10322	9.2898	14.6003
Avicennia schaueriana	VER	70697	63.6273	2017	1107	61966	87.6501	1.75511	0.556763	0.785448	10322	9.2898	14.6003
Avicennia schaueriana	VER	70697	63.6273	2018	536	61430	86.8919	0.86499	-0.890119	0.785448	10322	9.2898	14.6003
Avicennia schaueriana	VER	70697	63.6273	2019	660	60770	85.9584	1.07439	0.209403	0.785448	10322	9.2898	14.6003
Avicennia schaueriana	VER	70697	63.6273	2020	395	60375	85.3997	0.649992	-0.424402	0.785448	10322	9.2898	14.6003

## Sheet: Sheet1
Population	Total loss (km2)
PRC	10.098		19.3878	61.9659
VER	9.2898		42.5781
MRJ	7.0866
LGN	6.7032			0.312879
ALC	5.9004
GPM	5.8761
TMD	4.7871
PAa	4.3542
FLN	2.8026
PNB	1.467
CNN	1.2105
UBA	1.1961
PAR	1.1943
PPR	0.7722

## Sheet: Sheet3
Species	Population	Total loss (%)
Avicennia germinans	ALC	6.844
Avicennia germinans	ALC	6.844
Avicennia germinans	ALC	6.844
Avicennia germinans	ALC	6.844
Avicennia germinans	ALC	6.844
Avicennia germinans	ALC	6.844
Avicennia germinans	ALC	6.844
Avicennia germinans	ALC	6.844
Avicennia germinans	ALC	6.844
Avicennia germinans	ALC	6.844
Avicennia germinans	ALC	6.844
Avicennia germinans	ALC	6.844
Avicennia germinans	ALC	6.844
Avicennia germinans	ALC	6.844
Avicennia germinans	ALC	6.844
Avicennia germinans	ALC	6.844
Avicennia germinans	ALC	6.844
Avicennia germinans	ALC	6.844
Avicennia germinans	ALC	6.844
Avicennia germinans	ALC	6.844
Avicennia germinans	MRJ	13.2989
Avicennia germinans	MRJ	13.2989
Avicennia germinans	MRJ	13.2989
Avicennia germinans	MRJ	13.2989
Avicennia germinans	MRJ	13.2989
Avicennia germinans	MRJ	13.2989
Avicennia germinans	MRJ	13.2989
Avicennia germinans	MRJ	13.2989
Avicennia germinans	MRJ	13.2989
Avicennia germinans	MRJ	13.2989
Avicennia germinans	MRJ	13.2989
Avicennia germinans	MRJ	13.2989
Avicennia germinans	MRJ	13.2989
Avicennia germinans	MRJ	13.2989
Avicennia germinans	MRJ	13.2989
Avicennia germinans	MRJ	13.2989
Avicennia germinans	MRJ	13.2989
Avicennia germinans	MRJ	13.2989
Avicennia germinans	MRJ	13.2989
Avicennia germinans	MRJ	13.2989
Avicennia germinans	PAb	2.48517
Avicennia germinans	PAb	2.48517
Avicennia germinans	PAb	2.48517
Avicennia germinans	PAb	2.48517
Avicennia germinans	PAb	2.48517
Avicennia germinans	PAb	2.48517
Avicennia germinans	PAb	2.48517
Avicennia germinans	PAb	2.48517
Avicennia germinans	PAb	2.48517
Avicennia germinans	PAb	2.48517
Avicennia germinans	PAb	2.48517
Avicennia germinans	PAb	2.48517
Avicennia germinans	PAb	2.48517
Avicennia germinans	PAb	2.48517
Avicennia germinans	PAb	2.48517
Avicennia germinans	PAb	2.48517
Avicennia germinans	PAb	2.48517
Avicennia germinans	PAb	2.48517
Avicennia germinans	PAb	2.48517
Avicennia germinans	PAb	2.48517
Avicennia germinans	PNB	8.36241
Avicennia germinans	PNB	8.36241
Avicennia germinans	PNB	8.36241
Avicennia germinans	PNB	8.36241
Avicennia germinans	PNB	8.36241
Avicennia germinans	PNB	8.36241
Avicennia germinans	PNB	8.36241
Avicennia germinans	PNB	8.36241
Avicennia germinans	PNB	8.36241
Avicennia germinans	PNB	8.36241
Avicennia germinans	PNB	8.36241
Avicennia germinans	PNB	8.36241
Avicennia germinans	PNB	8.36241
Avicennia germinans	PNB	8.36241
Avicennia germinans	PNB	8.36241
Avicennia germinans	PNB	8.36241
Avicennia germinans	PNB	8.36241
Avicennia germinans	PNB	8.36241
Avicennia germinans	PNB	8.36241
Avicennia germinans	PRC	96.8076
Avicennia germinans	PRC	96.8076
Avicennia germinans	PRC	96.8076
Avicennia germinans	PRC	96.8076
Avicennia germinans	PRC	96.8076
Avicennia germinans	PRC	96.8076
Avicennia germinans	PRC	96.8076
Avicennia germinans	PRC	96.8076
Avicennia germinans	PRC	96.8076
Avicennia germinans	PRC	96.8076
Avicennia germinans	PRC	96.8076
Avicennia germinans	PRC	96.8076
Avicennia germinans	PRC	96.8076
Avicennia germinans	PRC	96.8076
Avicennia germinans	PRC	96.8076
Avicennia germinans	PRC	96.8076
Avicennia germinans	PRC	96.8076
Avicennia germinans	PRC	96.8076
Avicennia germinans	PRC	96.8076
Avicennia germinans	PRC	96.8076
Avicennia germinans	TMD	9.36576
Avicennia germinans	TMD	9.36576
Avicennia germinans	TMD	9.36576
Avicennia germinans	TMD	9.36576
Avicennia germinans	TMD	9.36576
Avicennia germinans	TMD	9.36576
Avicennia germinans	TMD	9.36576
Avicennia germinans	TMD	9.36576
Avicennia germinans	TMD	9.36576
Avicennia germinans	TMD	9.36576
Avicennia germinans	TMD	9.36576
Avicennia germinans	TMD	9.36576
Avicennia germinans	TMD	9.36576
Avicennia germinans	TMD	9.36576
Avicennia germinans	TMD	9.36576
Avicennia germinans	TMD	9.36576
Avicennia germinans	TMD	9.36576
Avicennia germinans	TMD	9.36576
Avicennia germinans	TMD	9.36576
Avicennia germinans	TMD	9.36576
Avicennia schaueriana	ALC	6.844
Avicennia schaueriana	ALC	6.844
Avicennia schaueriana	ALC	6.844
Avicennia schaueriana	ALC	6.844
Avicennia schaueriana	ALC	6.844
Avicennia schaueriana	ALC	6.844
Avicennia schaueriana	ALC	6.844
Avicennia schaueriana	ALC	6.844
Avicennia schaueriana	ALC	6.844
Avicennia schaueriana	ALC	6.844
Avicennia schaueriana	ALC	6.844
Avicennia schaueriana	ALC	6.844
Avicennia schaueriana	ALC	6.844
Avicennia schaueriana	ALC	6.844
Avicennia schaueriana	ALC	6.844
Avicennia schaueriana	ALC	6.844
Avicennia schaueriana	ALC	6.844
Avicennia schaueriana	ALC	6.844
Avicennia schaueriana	ALC	6.844
Avicennia schaueriana	ALC	6.844
Avicennia schaueriana	CNN	0.493585
Avicennia schaueriana	CNN	0.493585
Avicennia schaueriana	CNN	0.493585
Avicennia schaueriana	CNN	0.493585
Avicennia schaueriana	CNN	0.493585
Avicennia schaueriana	CNN	0.493585
Avicennia schaueriana	CNN	0.493585
Avicennia schaueriana	CNN	0.493585
Avicennia schaueriana	CNN	0.493585
Avicennia schaueriana	CNN	0.493585
Avicennia schaueriana	CNN	0.493585
Avicennia schaueriana	CNN	0.493585
Avicennia schaueriana	CNN	0.493585
Avicennia schaueriana	CNN	0.493585
Avicennia schaueriana	CNN	0.493585
Avicennia schaueriana	CNN	0.493585
Avicennia schaueriana	CNN	0.493585
Avicennia schaueriana	CNN	0.493585
Avicennia schaueriana	CNN	0.493585
Avicennia schaueriana	CNN	0.493585
Avicennia schaueriana	FLN	2.62842
Avicennia schaueriana	FLN	2.62842
Avicennia schaueriana	FLN	2.62842
Avicennia schaueriana	FLN	2.62842
Avicennia schaueriana	FLN	2.62842
Avicennia schaueriana	FLN	2.62842
Avicennia schaueriana	FLN	2.62842
Avicennia schaueriana	FLN	2.62842
Avicennia schaueriana	FLN	2.62842
Avicennia schaueriana	FLN	2.62842
Avicennia schaueriana	FLN	2.62842
Avicennia schaueriana	FLN	2.62842
Avicennia schaueriana	FLN	2.62842
Avicennia schaueriana	FLN	2.62842
Avicennia schaueriana	FLN	2.62842
Avicennia schaueriana	FLN	2.62842
Avicennia schaueriana	FLN	2.62842
Avicennia schaueriana	FLN	2.62842
Avicennia schaueriana	FLN	2.62842
Avicennia schaueriana	FLN	2.62842
Avicennia schaueriana	GPM	5.62152
Avicennia schaueriana	GPM	5.62152
Avicennia schaueriana	GPM	5.62152
Avicennia schaueriana	GPM	5.62152
Avicennia schaueriana	GPM	5.62152
Avicennia schaueriana	GPM	5.62152
Avicennia schaueriana	GPM	5.62152
Avicennia schaueriana	GPM	5.62152
Avicennia schaueriana	GPM	5.62152
Avicennia schaueriana	GPM	5.62152
Avicennia schaueriana	GPM	5.62152
Avicennia schaueriana	GPM	5.62152
Avicennia schaueriana	GPM	5.62152
Avicennia schaueriana	GPM	5.62152
Avicennia schaueriana	GPM	5.62152
Avicennia schaueriana	GPM	5.62152
Avicennia schaueriana	GPM	5.62152
Avicennia schaueriana	GPM	5.62152
Avicennia schaueriana	GPM	5.62152
Avicennia schaueriana	GPM	5.62152
Avicennia schaueriana	LGN	22.7184
Avicennia schaueriana	LGN	22.7184
Avicennia schaueriana	LGN	22.7184
Avicennia schaueriana	LGN	22.7184
Avicennia schaueriana	LGN	22.7184
Avicennia schaueriana	LGN	22.7184
Avicennia schaueriana	LGN	22.7184
Avicennia schaueriana	LGN	22.7184
Avicennia schaueriana	LGN	22.7184
Avicennia schaueriana	LGN	22.7184
Avicennia schaueriana	LGN	22.7184
Avicennia schaueriana	LGN	22.7184
Avicennia schaueriana	LGN	22.7184
Avicennia schaueriana	LGN	22.7184
Avicennia schaueriana	LGN	22.7184
Avicennia schaueriana	LGN	22.7184
Avicennia schaueriana	LGN	22.7184
Avicennia schaueriana	LGN	22.7184
Avicennia schaueriana	LGN	22.7184
Avicennia schaueriana	LGN	22.7184
Avicennia schaueriana	PAR	1.61457
Avicennia schaueriana	PAR	1.61457
Avicennia schaueriana	PAR	1.61457
Avicennia schaueriana	PAR	1.61457
Avicennia schaueriana	PAR	1.61457
Avicennia schaueriana	PAR	1.61457
Avicennia schaueriana	PAR	1.61457
Avicennia schaueriana	PAR	1.61457
Avicennia schaueriana	PAR	1.61457
Avicennia schaueriana	PAR	1.61457
Avicennia schaueriana	PAR	1.61457
Avicennia schaueriana	PAR	1.61457
Avicennia schaueriana	PAR	1.61457
Avicennia schaueriana	PAR	1.61457
Avicennia schaueriana	PAR	1.61457
Avicennia schaueriana	PAR	1.61457
Avicennia schaueriana	PAR	1.61457
Avicennia schaueriana	PAR	1.61457
Avicennia schaueriana	PAR	1.61457
Avicennia schaueriana	PPR	0.916383
Avicennia schaueriana	PPR	0.916383
Avicennia schaueriana	PPR	0.916383
Avicennia schaueriana	PPR	0.916383
Avicennia schaueriana	PPR	0.916383
Avicennia schaueriana	PPR	0.916383
Avicennia schaueriana	PPR	0.916383
Avicennia schaueriana	PPR	0.916383
Avicennia schaueriana	PPR	0.916383
Avicennia schaueriana	PPR	0.916383
Avicennia schaueriana	PPR	0.916383
Avicennia schaueriana	PPR	0.916383
Avicennia schaueriana	PPR	0.916383
Avicennia schaueriana	PPR	0.916383
Avicennia schaueriana	PPR	0.916383
Avicennia schaueriana	PPR	0.916383
Avicennia schaueriana	PPR	0.916383
Avicennia schaueriana	PPR	0.916383
Avicennia schaueriana	PPR	0.916383
Avicennia schaueriana	PRC	96.8076
Avicennia schaueriana	PRC	96.8076
Avicennia schaueriana	PRC	96.8076
Avicennia schaueriana	PRC	96.8076
Avicennia schaueriana	PRC	96.8076
Avicennia schaueriana	PRC	96.8076
Avicennia schaueriana	PRC	96.8076
Avicennia schaueriana	PRC	96.8076
Avicennia schaueriana	PRC	96.8076
Avicennia schaueriana	PRC	96.8076
Avicennia schaueriana	PRC	96.8076
Avicennia schaueriana	PRC	96.8076
Avicennia schaueriana	PRC	96.8076
Avicennia schaueriana	PRC	96.8076
Avicennia schaueriana	PRC	96.8076
Avicennia schaueriana	PRC	96.8076
Avicennia schaueriana	PRC	96.8076
Avicennia schaueriana	PRC	96.8076
Avicennia schaueriana	PRC	96.8076
Avicennia schaueriana	PRC	96.8076
Avicennia schaueriana	UBA	0.578047
Avicennia schaueriana	UBA	0.578047
Avicennia schaueriana	UBA	0.578047
Avicennia schaueriana	UBA	0.578047
Avicennia schaueriana	UBA	0.578047
Avicennia schaueriana	UBA	0.578047
Avicennia schaueriana	UBA	0.578047
Avicennia schaueriana	UBA	0.578047
Avicennia schaueriana	UBA	0.578047
Avicennia schaueriana	UBA	0.578047
Avicennia schaueriana	UBA	0.578047
Avicennia schaueriana	UBA	0.578047
Avicennia schaueriana	UBA	0.578047
Avicennia schaueriana	UBA	0.578047
Avicennia schaueriana	UBA	0.578047
Avicennia schaueriana	UBA	0.578047
Avicennia schaueriana	UBA	0.578047
Avicennia schaueriana	UBA	0.578047
Avicennia schaueriana	UBA	0.578047
Avicennia schaueriana	UBA	0.578047
Avicennia schaueriana	VER	14.6003
Avicennia schaueriana	VER	14.6003
Avicennia schaueriana	VER	14.6003
Avicennia schaueriana	VER	14.6003
Avicennia schaueriana	VER	14.6003
Avicennia schaueriana	VER	14.6003
Avicennia schaueriana	VER	14.6003
Avicennia schaueriana	VER	14.6003
Avicennia schaueriana	VER	14.6003
Avicennia schaueriana	VER	14.6003
Avicennia schaueriana	VER	14.6003
Avicennia schaueriana	VER	14.6003
Avicennia schaueriana	VER	14.6003
Avicennia schaueriana	VER	14.6003
Avicennia schaueriana	VER	14.6003
Avicennia schaueriana	VER	14.6003
Avicennia schaueriana	VER	14.6003
Avicennia schaueriana	VER	14.6003
Avicennia schaueriana	VER	14.6003
Avicennia schaueriana	VER	14.6003

## Sheet: Sheet5
Species	Population	2000 forest cover (cell count)	Mean annual loss (%)	Total loss (km2)	Total loss (%)
Avicennia schaueriana	PRC	11590	13.4728	10.098	96.8076
Avicennia schaueriana	LGN	32784	1.27237	6.7032	22.7184
Avicennia schaueriana	VER	70697	0.785448	9.2898	14.6003
Avicennia germinans	MRJ	59208	0.709702	7.0866	13.2989
Avicennia germinans	TMD	56792	0.488977	4.7871	9.36576
Avicennia germinans	PNB	19492	0.460835	1.467	8.36241
Avicennia germinans	ALC	95792	0.353564	5.9004	6.844
Avicennia schaueriana	GPM	116143	0.288363	5.8761	5.62152
Avicennia schaueriana	FLN	118474	0.132988	2.8026	2.62842
Avicennia germinans	PAb	194675	0.12552	4.3542	2.48517
Avicennia schaueriana	PPR	93629	0.109812	0.7722	0.916383
Avicennia schaueriana	PAR	82189	0.0811291	1.1943	1.61457
Avicennia schaueriana	UBA	229912	0.0289779	1.1961	0.578047
Avicennia schaueriana	CNN	272496	0.0247326	1.2105	0.493585
