# Supplementary material for: Differential Adaptive Potential and Vulnerability to Climate-Driven Habitat Loss in Brazilian Mangroves
Source: Frontiers journal article supplement (doi:10.3389/fcosc.2022.763325), 2022-03-22
Supplement: Table_3.XLSX [file Table_3.XLSX]

## Sheet: Sheet1
	catalognumber	genus	species	scientificname	longitude	latitude	continent	country	county	locality	.val	.equ	.zer	.cap	.cen	.sea	.otl	.gbf	.inst	.summary
1	218947312	Avicennia	germinans	Avicennia germinans	-117.033	32.5347		MX	Tijuana	Cerca de Tijuana hacia Tecate.	TRUE	TRUE	TRUE	TRUE	TRUE	TRUE	TRUE	TRUE	TRUE	TRUE
5	218947237	Avicennia	germinans	Avicennia germinans	-112.333	29.0389		MX	Hermosillo	2.7 km N of Punta Chueca, on coast of Gulf of California	TRUE	TRUE	TRUE	TRUE	TRUE	TRUE	TRUE	TRUE	TRUE	TRUE
6	239259789	Avicennia	germinans	Avicennia germinans	-112.293	29.2244		MX		Isla TiburÃ³n. Cyazim It, a sand spit between dense patches of mangroves in the estero at Punta Perla. Coastal vegetation. With: Batis maritima, Distichlis littoralis, D. spicata, Laguncularia racemosa, Rhizophora mangle.	TRUE	TRUE	TRUE	TRUE	TRUE	TRUE	TRUE	TRUE	TRUE	TRUE
7	175922767	Avicennia	germinans	Avicennia germinans	-112.215	28.9839		MX		Isla TiburÃ³n. Isla TiburÃ³n. East side of island, on beach ca. 1 km north of Estero de San Miguel. Costal vegetation. With: Allenrofea occidentalis, Sueda nigra, Mayatenus phyllanthoides	TRUE	TRUE	TRUE	TRUE	TRUE	TRUE	TRUE	TRUE	TRUE	TRUE
12	370153621	Avicennia	germinans	Avicennia germinans	-112.167	29.039		MX	HERMOSILLO	Punta Chueca, 2.7 km, north.	TRUE	TRUE	TRUE	TRUE	TRUE	TRUE	TRUE	TRUE	TRUE	TRUE
17	235860504	Avicennia	germinans	Avicennia germinans	-112.15	24.633		MX	COMONDU	Isla Magdalena	TRUE	TRUE	TRUE	TRUE	TRUE	TRUE	TRUE	TRUE	TRUE	TRUE
18	239846658	Avicennia	germinans	Avicennia germinans	-112.15	24.633		MX	COMONDU	Punta Corsa, en el manglar	TRUE	TRUE	TRUE	TRUE	TRUE	TRUE	TRUE	TRUE	TRUE	TRUE
19	239846512	Avicennia	germinans	Avicennia germinans	-112.15	24.633		MX	COMONDU	Punta Corsa, en el manglar	TRUE	TRUE	TRUE	TRUE	TRUE	TRUE	TRUE	TRUE	TRUE	TRUE
20	239846473	Avicennia	germinans	Avicennia germinans	-112.15	24.633		MX	COMONDU	Punta Corsa, en el manglar	TRUE	TRUE	TRUE	TRUE	TRUE	TRUE	TRUE	TRUE	TRUE	TRUE
21	235860598	Avicennia	germinans	Avicennia germinans	-112.15	24.633		MX	COMONDU	Isla Magdalena	TRUE	TRUE	TRUE	TRUE	TRUE	TRUE	TRUE	TRUE	TRUE	TRUE
22	235860471	Avicennia	germinans	Avicennia germinans	-112.15	24.633		MX	COMONDU	Isla Magdalena	TRUE	TRUE	TRUE	TRUE	TRUE	TRUE	TRUE	TRUE	TRUE	TRUE
23	218946892	Avicennia	germinans	Avicennia germinans	-112.133	24.6361		MX	Comondu	Colina Coyote, Isla Magdalena.	TRUE	TRUE	TRUE	TRUE	TRUE	TRUE	TRUE	TRUE	TRUE	TRUE
31	203596431	Avicennia	germinans	Avicennia germinans	-111.974	26.877		MX		Bahia Conception, Playa Los Cocos; At outer margin of mangrove swamp in silty mud. .	TRUE	TRUE	TRUE	TRUE	TRUE	TRUE	TRUE	TRUE	TRUE	TRUE
33	370153631	Avicennia	germinans	Avicennia germinans	-111.898	28.828		MX	HERMOSILLO	2 mi S of town BahÃ­a Kino.	TRUE	TRUE	TRUE	TRUE	TRUE	TRUE	TRUE	TRUE	TRUE	TRUE
34	319179736	Avicennia	germinans	Avicennia germinans	-111.89	26.75	NORTH_AMERICA	MX		119 km al NW de Loreto (carretera Loreto-Santa RosalÃ­a).	TRUE	TRUE	TRUE	TRUE	TRUE	TRUE	TRUE	TRUE	TRUE	TRUE
35	218946930	Avicennia	germinans	Avicennia germinans	-111.833	26.6181		MX	Mulege	BahÃ­a ConcepciÃ³n.	TRUE	TRUE	TRUE	TRUE	TRUE	TRUE	TRUE	TRUE	TRUE	TRUE
38	218946969	Avicennia	germinans	Avicennia germinans	-111.783	28.8169		MX	Hermosillo	Estero de la Cruz, bahÃ­a de Kino.	TRUE	TRUE	TRUE	TRUE	TRUE	TRUE	TRUE	TRUE	TRUE	TRUE
39	218947222	Avicennia	germinans	Avicennia germinans	-111.75	26.2536		MX	Mulege	25 km S of Mulege on highway 1.	TRUE	TRUE	TRUE	TRUE	TRUE	TRUE	TRUE	TRUE	TRUE	TRUE
46	239846542	Avicennia	germinans	Avicennia germinans	-111.706	24.381		MX	COMONDU	Ca. Manglar Las Tijeras, en el lado SE de Isla Santa Margarita, mpio. ComondÃº, B.C.S.	TRUE	TRUE	TRUE	TRUE	TRUE	TRUE	TRUE	TRUE	TRUE	TRUE
47	235860524	Avicennia	germinans	Avicennia germinans	-111.706	24.381		MX	COMONDU	Isla Santa Margarita	TRUE	TRUE	TRUE	TRUE	TRUE	TRUE	TRUE	TRUE	TRUE	TRUE
50	218947154	Avicennia	germinans	Avicennia germinans	-111.183	25.9489		MX	Loreto	Puerto Balandra, Isla El Carmen.	TRUE	TRUE	TRUE	TRUE	TRUE	TRUE	TRUE	TRUE	TRUE	TRUE
51	218947430	Avicennia	germinans	Avicennia germinans	-111.183	25.9489		MX	Loreto	Puerto Balandra, Isla El Carmen.	TRUE	TRUE	TRUE	TRUE	TRUE	TRUE	TRUE	TRUE	TRUE	TRUE
57	236255759	Avicennia	germinans	Avicennia germinans	-110.95	27.967		MX	Guaymas	Guaymas, 8 KM NW	TRUE	TRUE	TRUE	TRUE	TRUE	TRUE	TRUE	TRUE	TRUE	TRUE
58	145055779	Avicennia	germinans	Avicennia germinans	-110.95	27.967		MX	GUAYMAS	Guaymas, 8 KM NW	TRUE	TRUE	TRUE	TRUE	TRUE	TRUE	TRUE	TRUE	TRUE	TRUE
65	218947429	Avicennia	germinans	Avicennia germinans	-110.633	24.9722		MX	La Paz	Isla San JosÃ©, SW de la Isla.	TRUE	TRUE	TRUE	TRUE	TRUE	TRUE	TRUE	TRUE	TRUE	TRUE
66	218947058	Avicennia	germinans	Avicennia germinans	-110.633	24.9722		MX	La Paz	Isla San JosÃ©.	TRUE	TRUE	TRUE	TRUE	TRUE	TRUE	TRUE	TRUE	TRUE	TRUE
67	239846465	Avicennia	germinans	Avicennia germinans	-110.6	24.917		MX	PAZ, LA	BahÃ­a La Amortajada, en la ensenada	TRUE	TRUE	TRUE	TRUE	TRUE	TRUE	TRUE	TRUE	TRUE	TRUE
68	235860502	Avicennia	germinans	Avicennia germinans	-110.6	24.917		MX	PAZ, LA	Isla San JosÃ©	TRUE	TRUE	TRUE	TRUE	TRUE	TRUE	TRUE	TRUE	TRUE	TRUE
69	239846510	Avicennia	germinans	Avicennia germinans	-110.6	24.917		MX	PAZ, LA	BahÃ­a La Amortajada, en la ensenada	TRUE	TRUE	TRUE	TRUE	TRUE	TRUE	TRUE	TRUE	TRUE	TRUE
70	239846710	Avicennia	germinans	Avicennia germinans	-110.6	24.917		MX	PAZ, LA	BahÃ­a La Amortajada, en la ensenada	TRUE	TRUE	TRUE	TRUE	TRUE	TRUE	TRUE	TRUE	TRUE	TRUE
71	235860650	Avicennia	germinans	Avicennia germinans	-110.6	24.917		MX	PAZ, LA	Isla San JosÃ©	TRUE	TRUE	TRUE	TRUE	TRUE	TRUE	TRUE	TRUE	TRUE	TRUE
72	235860465	Avicennia	germinans	Avicennia germinans	-110.6	24.917		MX	PAZ, LA	Isla San JosÃ©	TRUE	TRUE	TRUE	TRUE	TRUE	TRUE	TRUE	TRUE	TRUE	TRUE
75	218946793	Avicennia	germinans	Avicennia germinans	-110.583	24.9889		MX	La Paz	Gulf of California, NE part of Isla San Francisco.	TRUE	TRUE	TRUE	TRUE	TRUE	TRUE	TRUE	TRUE	TRUE	TRUE
82	319179605	Avicennia	germinans	Avicennia germinans	-110.47	24.18	NORTH_AMERICA	MX		Collected along the about 5 miles northwest of La Paz.	TRUE	TRUE	TRUE	TRUE	TRUE	TRUE	TRUE	TRUE	TRUE	TRUE
83	218946792	Avicennia	germinans	Avicennia germinans	-110.433	24.1336		MX	La Paz	Playa El ComitÃ¡n.	TRUE	TRUE	TRUE	TRUE	TRUE	TRUE	TRUE	TRUE	TRUE	TRUE
84	235860866	Avicennia	germinans	Avicennia germinans	-110.433	24.15		MX	PAZ, LA	La Paz	TRUE	TRUE	TRUE	TRUE	TRUE	TRUE	TRUE	TRUE	TRUE	TRUE
85	239846868	Avicennia	germinans	Avicennia germinans	-110.433	24.15		MX	PAZ, LA	Northwest of La Paz, just south of thel Mogote Peninsula	TRUE	TRUE	TRUE	TRUE	TRUE	TRUE	TRUE	TRUE	TRUE	TRUE
112	235860736	Avicennia	germinans	Avicennia germinans	-110.3	24.267		MX	PAZ, LA	El Tesoro	TRUE	TRUE	TRUE	TRUE	TRUE	TRUE	TRUE	TRUE	TRUE	TRUE
113	239846777	Avicennia	germinans	Avicennia germinans	-110.3	24.267		MX	PAZ, LA	Playa El Tesoro, 14 Km al N de La Paz	TRUE	TRUE	TRUE	TRUE	TRUE	TRUE	TRUE	TRUE	TRUE	TRUE
114	235860520	Avicennia	germinans	Avicennia germinans	-110.3	24.267		MX	PAZ, LA	Playa Tesoro	TRUE	TRUE	TRUE	TRUE	TRUE	TRUE	TRUE	TRUE	TRUE	TRUE
115	239846530	Avicennia	germinans	Avicennia germinans	-110.3	24.267		MX	PAZ, LA	Playa El Tesoro, 14 Km al N de La Paz	TRUE	TRUE	TRUE	TRUE	TRUE	TRUE	TRUE	TRUE	TRUE	TRUE
116	218946988	Avicennia	germinans	Avicennia germinans	-110.3	24.2278		MX	La Paz	Punta Prieta, cerca de Pichilingue, 13 km al NE de La Paz.	TRUE	TRUE	TRUE	TRUE	TRUE	TRUE	TRUE	TRUE	TRUE	TRUE
117	145056223	Avicennia	germinans	Avicennia germinans	-110.3	24.133		MX	PAZ, LA	Paz, La	TRUE	TRUE	TRUE	TRUE	TRUE	TRUE	TRUE	TRUE	TRUE	TRUE
118	236255635	Avicennia	germinans	Avicennia germinans	-110.3	24.133		MX	Paz, La	Paz, La	TRUE	TRUE	TRUE	TRUE	TRUE	TRUE	TRUE	TRUE	TRUE	TRUE
119	218946929	Avicennia	germinans	Avicennia germinans	-110.25	24.2208		MX	La Paz	1.8 miles E of La Paz, along road to Pichilinque Bay.	TRUE	TRUE	TRUE	TRUE	TRUE	TRUE	TRUE	TRUE	TRUE	TRUE
120	218947103	Avicennia	germinans	Avicennia germinans	-110.183	23.9878		MX	La Paz	N side of Santispaquis Cove, BahÃ­a de la Concepcion.	TRUE	TRUE	TRUE	TRUE	TRUE	TRUE	TRUE	TRUE	TRUE	TRUE
121	239846507	Avicennia	germinans	Avicennia germinans	-110.167	24.167		MX	PAZ, LA	Chametla, 8 km al SW de La Paz	TRUE	TRUE	TRUE	TRUE	TRUE	TRUE	TRUE	TRUE	TRUE	TRUE
122	239846490	Avicennia	germinans	Avicennia germinans	-110.167	24.167		MX	PAZ, LA	Chametla, al NW de La Paz	TRUE	TRUE	TRUE	TRUE	TRUE	TRUE	TRUE	TRUE	TRUE	TRUE
123	239846707	Avicennia	germinans	Avicennia germinans	-110.167	24.167		MX	PAZ, LA	Chametla, al NW de La Paz	TRUE	TRUE	TRUE	TRUE	TRUE	TRUE	TRUE	TRUE	TRUE	TRUE
124	235860481	Avicennia	germinans	Avicennia germinans	-110.167	24.167		MX	PAZ, LA	Chametla	TRUE	TRUE	TRUE	TRUE	TRUE	TRUE	TRUE	TRUE	TRUE	TRUE
125	235860647	Avicennia	germinans	Avicennia germinans	-110.167	24.167		MX	PAZ, LA	Chametla	TRUE	TRUE	TRUE	TRUE	TRUE	TRUE	TRUE	TRUE	TRUE	TRUE
126	235860499	Avicennia	germinans	Avicennia germinans	-110.167	24.167		MX	PAZ, LA	Chametla	TRUE	TRUE	TRUE	TRUE	TRUE	TRUE	TRUE	TRUE	TRUE	TRUE
127	239847246	Avicennia	germinans	Avicennia germinans	-109.967	23.533		MX		Estero Tembabichi	TRUE	TRUE	TRUE	TRUE	TRUE	TRUE	TRUE	TRUE	TRUE	TRUE
128	218946957	Avicennia	germinans	Avicennia germinans	-109.917	27.9072		MX	Guaymas	Bay of San Carlos, Guaymas.	TRUE	TRUE	TRUE	TRUE	TRUE	TRUE	TRUE	TRUE	TRUE	TRUE
129	218946956	Avicennia	germinans	Avicennia germinans	-109.917	27.9072		MX	Guaymas	Near Guaymas, Bay of San Carlos.	TRUE	TRUE	TRUE	TRUE	TRUE	TRUE	TRUE	TRUE	TRUE	TRUE
130	218947075	Avicennia	germinans	Avicennia germinans	-109.917	27.9072		MX	Guaymas	San Carlos Bay, road to catch 22 beach, at Marina.	TRUE	TRUE	TRUE	TRUE	TRUE	TRUE	TRUE	TRUE	TRUE	TRUE
131	218947403	Avicennia	germinans	Avicennia germinans	-109.917	27.9072		MX	Guaymas	BahÃ­a San Carlos, W of Guaymas.	TRUE	TRUE	TRUE	TRUE	TRUE	TRUE	TRUE	TRUE	TRUE	TRUE
132	218946881	Avicennia	germinans	Avicennia germinans	-109.633	26.8275		MX	Huatabampo	Huatabampo.	TRUE	TRUE	TRUE	TRUE	TRUE	TRUE	TRUE	TRUE	TRUE	TRUE
133	218946918	Avicennia	germinans	Avicennia germinans	-109.633	26.8275		MX	Huatabampo	Huatabampo.	TRUE	TRUE	TRUE	TRUE	TRUE	TRUE	TRUE	TRUE	TRUE	TRUE
139	175922111	Avicennia	germinans	Avicennia germinans	-109.433	26.6694		MX		Dune behind beach at base of Punta Yavaros. 26Â°40'10''N, 109Â°26'W. Elevation less than 5 meters. Bayside of sand spit near mangroves.	TRUE	TRUE	TRUE	TRUE	TRUE	TRUE	TRUE	TRUE	TRUE	TRUE
140	218947269	Avicennia	germinans	Avicennia germinans	-109.217	26.4392		MX	Huatabampo	2 miles N of Puerto Yavaros.	TRUE	TRUE	TRUE	TRUE	TRUE	TRUE	TRUE	TRUE	TRUE	TRUE
145	371122089	Avicennia	germinans	Avicennia germinans	-109.01	25.569		MX	AHOME	Isla Mazocahui 1	TRUE	TRUE	TRUE	TRUE	TRUE	TRUE	TRUE	TRUE	TRUE	TRUE
146	218947336	Avicennia	germinans	Avicennia germinans	-108.983	25.7933		MX	Ahome	Estero Ballena, old channel of rÃ­o Fuerte, W of Los Mochis.	TRUE	TRUE	TRUE	TRUE	TRUE	TRUE	TRUE	TRUE	TRUE	TRUE
147	218947364	Avicennia	germinans	Avicennia germinans	-108.983	25.7933		MX	Ahome	Estero Ballena, old channel of rÃ­o Fuerte, W of Los Mochis.	TRUE	TRUE	TRUE	TRUE	TRUE	TRUE	TRUE	TRUE	TRUE	TRUE
148	370150228	Avicennia	germinans	Avicennia germinans	-108.875	26.961		MX	ALAMOS	Along Arroyo Alamos between junction with Arroyo Potrero and Rio Cuchujaqui between Rancho El Barzon and Rancho Los Norotes, 9.0 km (by air) SE of Alamos.	TRUE	TRUE	TRUE	TRUE	TRUE	TRUE	TRUE	TRUE	TRUE	TRUE
152	371115634	Avicennia	germinans	Avicennia germinans	-106.342	23.196		MX	MAZATLÃN	Ejido El Castillo	TRUE	TRUE	TRUE	TRUE	TRUE	TRUE	TRUE	TRUE	TRUE	TRUE
153	218947070	Avicennia	germinans	Avicennia germinans	-105.767	22.8339		MX	Escuinapa	Marismas de Escuinapa.	TRUE	TRUE	TRUE	TRUE	TRUE	TRUE	TRUE	TRUE	TRUE	TRUE
154	145055777	Avicennia	germinans	Avicennia germinans	-105.75	23.55		MX	ESCUINAPA	Palmito, El, 9 KM E, rumbo al Estero El Mezcal	TRUE	TRUE	TRUE	TRUE	TRUE	TRUE	TRUE	TRUE	TRUE	TRUE
155	236256044	Avicennia	germinans	Avicennia germinans	-105.75	23.55		MX	Escuinapa	Palmito, El, 9 KM E, rumbo al Estero El Mezcal	TRUE	TRUE	TRUE	TRUE	TRUE	TRUE	TRUE	TRUE	TRUE	TRUE
156	371119156	Avicennia	germinans	Avicennia germinans	-105.742	22.667		MX	ESCUINAPA	El Palmito del verde	TRUE	TRUE	TRUE	TRUE	TRUE	TRUE	TRUE	TRUE	TRUE	TRUE
157	218947076	Avicennia	germinans	Avicennia germinans	-105.517	21.9708		MX	Santiago Ixcuintla	10 km al O de UniÃ³n de Corrientes, camino a MezcaltitÃ¡n.	TRUE	TRUE	TRUE	TRUE	TRUE	TRUE	TRUE	TRUE	TRUE	TRUE
159	137438029	Avicennia	germinans	Avicennia germinans	-105.5	20.05		MX		Jalisco, TomatlÃ¡n, Orilla de la Laguna Agua Dulce, 6Km en direcciÃ³n NW del poblado La Cruz de Loreto	TRUE	TRUE	TRUE	TRUE	TRUE	TRUE	TRUE	TRUE	TRUE	TRUE
160	218947074	Avicennia	germinans	Avicennia germinans	-105.467	21.9058		MX	Santiago Ixcuintla	MexcaltitÃ¡n.	TRUE	TRUE	TRUE	TRUE	TRUE	TRUE	TRUE	TRUE	TRUE	TRUE
161	218947050	Avicennia	germinans	Avicennia germinans	-105.417	21.8478		MX	Santiago Ixcuintla	90 km al NO de Tepic, carretera Tepic-Mexcaltitan.	TRUE	TRUE	TRUE	TRUE	TRUE	TRUE	TRUE	TRUE	TRUE	TRUE
162	218947190	Avicennia	germinans	Avicennia germinans	-105.3	20.7333		MX	Bahia de Banderas	Laguna del Quelele.	TRUE	TRUE	TRUE	TRUE	TRUE	TRUE	TRUE	TRUE	TRUE	TRUE
163	235932868	Avicennia	germinans	Avicennia germinans	-105.285	21.54		MX	SAN BLAS	SAN BLAS	TRUE	TRUE	TRUE	TRUE	TRUE	TRUE	TRUE	TRUE	TRUE	TRUE
164	235932867	Avicennia	germinans	Avicennia germinans	-105.285	21.54		MX	SAN BLAS	SAN BLAS	TRUE	TRUE	TRUE	TRUE	TRUE	TRUE	TRUE	TRUE	TRUE	TRUE
165	319179679	Avicennia	germinans	Avicennia germinans	-105.28	21.55	NORTH_AMERICA	MX		A 1-2 km al E de San Blas, camino al crucero Tepic-San Blas-MazatlÃ¡n. Manglar.	TRUE	TRUE	TRUE	TRUE	TRUE	TRUE	TRUE	TRUE	TRUE	TRUE
166	218947359	Avicennia	germinans	Avicennia germinans	-105.25	21.5333		MX	San Blas	La Tronconuda.	TRUE	TRUE	TRUE	TRUE	TRUE	TRUE	TRUE	TRUE	TRUE	TRUE
167	218947388	Avicennia	germinans	Avicennia germinans	-105.25	21.5175		MX	San Blas	Las Isletas, 5 km E of San BlÃ¡s on the road to Miramar.	TRUE	TRUE	TRUE	TRUE	TRUE	TRUE	TRUE	TRUE	TRUE	TRUE
168	218947208	Avicennia	germinans	Avicennia germinans	-105.25	20.7839		MX	Bahia de Banderas	BahÃ­a de Banderas.	TRUE	TRUE	TRUE	TRUE	TRUE	TRUE	TRUE	TRUE	TRUE	TRUE
169	319179334	Avicennia	germinans	Avicennia germinans	-105.24	21.51	NORTH_AMERICA	MX		Las Isletas, 5 km east of San Blas on the road to Miramar. Mangrove swamp dominated by Laguncularia and Avicenia and adjacent open areas.	TRUE	TRUE	TRUE	TRUE	TRUE	TRUE	TRUE	TRUE	TRUE	TRUE
170	218947062	Avicennia	germinans	Avicennia germinans	-105.233	21.5603		MX	San Blas	1-2 km al E de San BlÃ¡s, camino al crucero Tepic-San BlÃ¡s-MazatlÃ¡n.	TRUE	TRUE	TRUE	TRUE	TRUE	TRUE	TRUE	TRUE	TRUE	TRUE
171	235687876	Avicennia	germinans	Avicennia germinans	-105.231	20.613		MX	PUERTO VALLARTA	Puerto Vallarta, Estero El Salado	TRUE	TRUE	TRUE	TRUE	TRUE	TRUE	TRUE	TRUE	TRUE	TRUE
172	218947231	Avicennia	germinans	Avicennia germinans	-105.15	19.6136		MX		Playa Mezcales, 94 km por la carretera costera Melaque - Puerto Vallarta.	TRUE	TRUE	TRUE	TRUE	TRUE	TRUE	TRUE	TRUE	TRUE	TRUE
173	235933673	Avicennia	germinans	Avicennia germinans	-105.144	19.606		MX		MEZCALES	TRUE	TRUE	TRUE	TRUE	TRUE	TRUE	TRUE	TRUE	TRUE	TRUE
174	235687874	Avicennia	germinans	Avicennia germinans	-105.142	19.603		MX		Playa Mezcales, 94 km carretera costera Melaque-Puerto Vallarta	TRUE	TRUE	TRUE	TRUE	TRUE	TRUE	TRUE	TRUE	TRUE	TRUE
175	370143934	Avicennia	germinans	Avicennia germinans	-105.136	19.586		MX		PÃ‰RULA.	TRUE	TRUE	TRUE	TRUE	TRUE	TRUE	TRUE	TRUE	TRUE	TRUE
176	235688558	Avicennia	germinans	Avicennia germinans	-105.128	19.59		MX		Punta PÃ©rula, Alrededor de la poblaciÃ³n	TRUE	TRUE	TRUE	TRUE	TRUE	TRUE	TRUE	TRUE	TRUE	TRUE
177	218947294	Avicennia	germinans	Avicennia germinans	-105.117	19.5911		MX		Perula.	TRUE	TRUE	TRUE	TRUE	TRUE	TRUE	TRUE	TRUE	TRUE	TRUE
178	218946926	Avicennia	germinans	Avicennia germinans	-105.117	19.5872		MX		Punta Perula, ejido La Fortuna, en bahÃ­a Chamela, desembocadura del arroyo Perula.	TRUE	TRUE	TRUE	TRUE	TRUE	TRUE	TRUE	TRUE	TRUE	TRUE
179	236255540	Avicennia	germinans	Avicennia germinans	-105.1	19.567		MX		BahÃ­a de Chamela	TRUE	TRUE	TRUE	TRUE	TRUE	TRUE	TRUE	TRUE	TRUE	TRUE
180	145056230	Avicennia	germinans	Avicennia germinans	-105.1	19.567		MX		BahÃ­a de Chamela	TRUE	TRUE	TRUE	TRUE	TRUE	TRUE	TRUE	TRUE	TRUE	TRUE
181	218946791	Avicennia	germinans	Avicennia germinans	-105.083	19.5494		MX		Playa Club, Playa Chamela, entre Playa Salina y Las Rosadas, km 67 carretera Barra de Navidad - Puerto Vallarta.	TRUE	TRUE	TRUE	TRUE	TRUE	TRUE	TRUE	TRUE	TRUE	TRUE
182	371205262	Avicennia	germinans	Avicennia germinans	-105.067	19.533		MX		Salinas, Chamela	TRUE	TRUE	TRUE	TRUE	TRUE	TRUE	TRUE	TRUE	TRUE	TRUE
183	371214598	Avicennia	germinans	Avicennia germinans	-105.067	19.533		MX		Salinas, Chamela	TRUE	TRUE	TRUE	TRUE	TRUE	TRUE	TRUE	TRUE	TRUE	TRUE
184	218946935	Avicennia	germinans	Avicennia germinans	-105.05	19.5003		MX		Salinas al N de Chamela.	TRUE	TRUE	TRUE	TRUE	TRUE	TRUE	TRUE	TRUE	TRUE	TRUE
185	218947024	Avicennia	germinans	Avicennia germinans	-105.05	19.5		MX		Las Salinas, EstaciÃ³n de BiologÃ­a Chamela.	TRUE	TRUE	TRUE	TRUE	TRUE	TRUE	TRUE	TRUE	TRUE	TRUE
186	218947265	Avicennia	germinans	Avicennia germinans	-105.033	19.4506		MX		Playa Careyitos, 7 km al SE de la EstaciÃ³n de BiologÃ­a Chamela, km 53 de la carretera Barra de Navidad - Puerto Vallarta.	TRUE	TRUE	TRUE	TRUE	TRUE	TRUE	TRUE	TRUE	TRUE	TRUE
187	218946769	Avicennia	germinans	Avicennia germinans	-105.033	19.4503		MX		Chamela Bay Region, Costa Careyes, 1 km S of Playa Careyitos.	TRUE	TRUE	TRUE	TRUE	TRUE	TRUE	TRUE	TRUE	TRUE	TRUE
188	319179607	Avicennia	germinans	Avicennia germinans	-105.03	19.45	NORTH_AMERICA	MX		Chamela Bay Region. Costa Careyes. Approx. 1 km S of Playa Careyitos. Tropical Deciduous Forest and coast scrub.	TRUE	TRUE	TRUE	TRUE	TRUE	TRUE	TRUE	TRUE	TRUE	TRUE
189	370147692	Avicennia	germinans	Avicennia germinans	-105.017	19.433		MX		LAS SALINAS.	TRUE	TRUE	TRUE	TRUE	TRUE	TRUE	TRUE	TRUE	TRUE	TRUE
190	370177773	Avicennia	germinans	Avicennia germinans	-105.017	19.433		MX		Chamela-Cuixmala	TRUE	TRUE	TRUE	TRUE	TRUE	TRUE	TRUE	TRUE	TRUE	TRUE
191	218947206	Avicennia	germinans	Avicennia germinans	-105.017	19.4333		MX		Salinas Careyes.	TRUE	TRUE	TRUE	TRUE	TRUE	TRUE	TRUE	TRUE	TRUE	TRUE
194	370177783	Avicennia	germinans	Avicennia germinans	-104.939	19.317		MX		Chamela-Cuixmala	TRUE	TRUE	TRUE	TRUE	TRUE	TRUE	TRUE	TRUE	TRUE	TRUE
195	371205287	Avicennia	germinans	Avicennia germinans	-104.933	19.333		MX		La Huerta	TRUE	TRUE	TRUE	TRUE	TRUE	TRUE	TRUE	TRUE	TRUE	TRUE
196	218947211	Avicennia	germinans	Avicennia germinans	-104.867	19.2875		MX		Playa Tenacatita.	TRUE	TRUE	TRUE	TRUE	TRUE	TRUE	TRUE	TRUE	TRUE	TRUE
197	370143138	Avicennia	germinans	Avicennia germinans	-104.864	19.283		MX		PLAYA TENACATITA.	TRUE	TRUE	TRUE	TRUE	TRUE	TRUE	TRUE	TRUE	TRUE	TRUE
198	218947160	Avicennia	germinans	Avicennia germinans	-104.817	19.3081		MX		Los Ãngeles, Tenacatita.	TRUE	TRUE	TRUE	TRUE	TRUE	TRUE	TRUE	TRUE	TRUE	TRUE
199	218947135	Avicennia	germinans	Avicennia germinans	-104.8	19.3028		MX		La Manzanilla.	TRUE	TRUE	TRUE	TRUE	TRUE	TRUE	TRUE	TRUE	TRUE	TRUE
200	145056227	Avicennia	germinans	Avicennia germinans	-104.7	19.2		MX		Barra de Navidad	TRUE	TRUE	TRUE	TRUE	TRUE	TRUE	TRUE	TRUE	TRUE	TRUE
201	236255456	Avicennia	germinans	Avicennia germinans	-104.7	19.2		MX		Barra de Navidad	TRUE	TRUE	TRUE	TRUE	TRUE	TRUE	TRUE	TRUE	TRUE	TRUE
202	218947402	Avicennia	germinans	Avicennia germinans	-104.667	19.2042		MX		Barra de Navidad.	TRUE	TRUE	TRUE	TRUE	TRUE	TRUE	TRUE	TRUE	TRUE	TRUE
203	235687875	Avicennia	germinans	Avicennia germinans	-104.336	19.234		MX		Playa de SalagÃ¼a	TRUE	TRUE	TRUE	TRUE	TRUE	TRUE	TRUE	TRUE	TRUE	TRUE
204	218947151	Avicennia	germinans	Avicennia germinans	-103.717	18.6831		MX		Boca de Apiza, al S de Coalcoman.	TRUE	TRUE	TRUE	TRUE	TRUE	TRUE	TRUE	TRUE	TRUE	TRUE
205	235932876	Avicennia	germinans	Avicennia germinans	-101.803	17.982		MX		UNION LA	TRUE	TRUE	TRUE	TRUE	TRUE	TRUE	TRUE	TRUE	TRUE	TRUE
206	235932875	Avicennia	germinans	Avicennia germinans	-101.55	17.645		MX		ZIHUATANEJO	TRUE	TRUE	TRUE	TRUE	TRUE	TRUE	TRUE	TRUE	TRUE	TRUE
207	235932872	Avicennia	germinans	Avicennia germinans	-100.018	17.012		MX		TAMARINDO EL	TRUE	TRUE	TRUE	TRUE	TRUE	TRUE	TRUE	TRUE	TRUE	TRUE
208	235932871	Avicennia	germinans	Avicennia germinans	-99.09	16.642		MX		CHAUTENGO	TRUE	TRUE	TRUE	TRUE	TRUE	TRUE	TRUE	TRUE	TRUE	TRUE
209	235932873	Avicennia	germinans	Avicennia germinans	-99.053	16.633		MX		PEÃ‘AS LAS	TRUE	TRUE	TRUE	TRUE	TRUE	TRUE	TRUE	TRUE	TRUE	TRUE
210	235688301	Avicennia	germinans	Avicennia germinans	-98.95	22.217		MX	PANUCO	ND	TRUE	TRUE	TRUE	TRUE	TRUE	TRUE	TRUE	TRUE	TRUE	TRUE
211	218947045	Avicennia	germinans	Avicennia germinans	-98.1333	23.3672		MX	Soto la Marina	1 km al O de La Pesca, cerca de Laguna Salada.	TRUE	TRUE	TRUE	TRUE	TRUE	TRUE	TRUE	TRUE	TRUE	TRUE
212	218947279	Avicennia	germinans	Avicennia germinans	-98.0333	22.22		MX	Panuco	Laguna de Tamos, sobre la carretera Tampico-PÃ¡nuco.	TRUE	TRUE	TRUE	TRUE	TRUE	TRUE	TRUE	TRUE	TRUE	TRUE
213	235688303	Avicennia	germinans	Avicennia germinans	-98.033	22.217		MX	PANUCO	Laguna de Tamos, alrededores	TRUE	TRUE	TRUE	TRUE	TRUE	TRUE	TRUE	TRUE	TRUE	TRUE
214	235688167	Avicennia	germinans	Avicennia germinans	-97.967	22.217		MX	PANUCO	ND	TRUE	TRUE	TRUE	TRUE	TRUE	TRUE	TRUE	TRUE	TRUE	TRUE
215	235688165	Avicennia	germinans	Avicennia germinans	-97.967	22.217		MX	PANUCO	ND	TRUE	TRUE	TRUE	TRUE	TRUE	TRUE	TRUE	TRUE	TRUE	TRUE
216	218946860	Avicennia	germinans	Avicennia germinans	-97.95	23.1925		MX	Aldama	Ejido San Rafael, rancho Nuevo, 20 km al S Barra de Ostiones.	TRUE	TRUE	TRUE	TRUE	TRUE	TRUE	TRUE	TRUE	TRUE	TRUE
217	235688166	Avicennia	germinans	Avicennia germinans	-97.95	22.217		MX	PANUCO	ND	TRUE	TRUE	TRUE	TRUE	TRUE	TRUE	TRUE	TRUE	TRUE	TRUE
218	235688164	Avicennia	germinans	Avicennia germinans	-97.95	22.217		MX	PANUCO	ND	TRUE	TRUE	TRUE	TRUE	TRUE	TRUE	TRUE	TRUE	TRUE	TRUE
219	235687870	Avicennia	germinans	Avicennia germinans	-97.932	22.394		MX	ALTAMIRA	Altamira, playa cerca del Puerto Industrial	TRUE	TRUE	TRUE	TRUE	TRUE	TRUE	TRUE	TRUE	TRUE	TRUE
220	370341787	Avicennia	germinans	Avicennia germinans	-97.9	23.516		MX	ALDAMA	Entre Barranca y Lomas del Real	TRUE	TRUE	TRUE	TRUE	TRUE	TRUE	TRUE	TRUE	TRUE	TRUE
221	218947207	Avicennia	germinans	Avicennia germinans	-97.9	22.1856		MX	Pueblo Viejo	Laguna de Pueblo Viejo, en los limÃ­tes con Tamaulipas.	TRUE	TRUE	TRUE	TRUE	TRUE	TRUE	TRUE	TRUE	TRUE	TRUE
222	370528893	Avicennia	germinans	Avicennia germinans	-97.891	22.23		MX	TAMPICO	Canal del Zapote, Libramiento Tampico a Veracruz	TRUE	TRUE	TRUE	TRUE	TRUE	TRUE	TRUE	TRUE	TRUE	TRUE
223	370542883	Avicennia	germinans	Avicennia germinans	-97.872	22.226		MX	TAMPICO	Laguna del Chairel, Puente Chairel	TRUE	TRUE	TRUE	TRUE	TRUE	TRUE	TRUE	TRUE	TRUE	TRUE
224	370528931	Avicennia	germinans	Avicennia germinans	-97.871	22.227		MX	TAMPICO	RÃ­o Moralillo, Puente Chairel	TRUE	TRUE	TRUE	TRUE	TRUE	TRUE	TRUE	TRUE	TRUE	TRUE
225	370528909	Avicennia	germinans	Avicennia germinans	-97.871	22.227		MX	TAMPICO	RÃ­o Moralillo, Puente Chairel	TRUE	TRUE	TRUE	TRUE	TRUE	TRUE	TRUE	TRUE	TRUE	TRUE
226	218946879	Avicennia	germinans	Avicennia germinans	-97.8667	22.1667		MX	Panuco	Laguna Pueblo Viejo.	TRUE	TRUE	TRUE	TRUE	TRUE	TRUE	TRUE	TRUE	TRUE	TRUE
227	319179635	Avicennia	germinans	Avicennia germinans	-97.86	22.25	NORTH_AMERICA	MX		vicinity of Tampico	TRUE	TRUE	TRUE	TRUE	TRUE	TRUE	TRUE	TRUE	TRUE	TRUE
228	218947428	Avicennia	germinans	Avicennia germinans	-97.85	22.4356		MX	Altamira	Laguna Las Marismas.	TRUE	TRUE	TRUE	TRUE	TRUE	TRUE	TRUE	TRUE	TRUE	TRUE
229	370339928	Avicennia	germinans	Avicennia germinans	-97.816	23.8		MX	SOTO LA MARINA	1 km al W de La Pesca, cerca de la Laguna Salada	TRUE	TRUE	TRUE	TRUE	TRUE	TRUE	TRUE	TRUE	TRUE	TRUE
230	370340633	Avicennia	germinans	Avicennia germinans	-97.816	22.25		MX	CIUDAD MADERO	Laguna de la Costa	TRUE	TRUE	TRUE	TRUE	TRUE	TRUE	TRUE	TRUE	TRUE	TRUE
231	370340962	Avicennia	germinans	Avicennia germinans	-97.8	23.233		MX	ALDAMA	20 km al S de Barra de Ostiones, en el Ejido San Rafael, Rancho Nuevo	TRUE	TRUE	TRUE	TRUE	TRUE	TRUE	TRUE	TRUE	TRUE	TRUE
232	370341726	Avicennia	germinans	Avicennia germinans	-97.8	23.2		MX	ALDAMA	2 km al E de Rancho Nuevo, en planicie costera	TRUE	TRUE	TRUE	TRUE	TRUE	TRUE	TRUE	TRUE	TRUE	TRUE
233	370341732	Avicennia	germinans	Avicennia germinans	-97.8	23.2		MX	ALDAMA	2 km al E de Rancho Nuevo, en planicie costera	TRUE	TRUE	TRUE	TRUE	TRUE	TRUE	TRUE	TRUE	TRUE	TRUE
234	370341268	Avicennia	germinans	Avicennia germinans	-97.783	23.783		MX	SOTO LA MARINA	La Pesca, costa SE de Tamaulipas, margen S del rÃ­o Soto la Marina	TRUE	TRUE	TRUE	TRUE	TRUE	TRUE	TRUE	TRUE	TRUE	TRUE
235	370340850	Avicennia	germinans	Avicennia germinans	-97.783	23.783		MX	SOTO LA MARINA	La Pesca, costa SE de Tamaulipas, una desembocadura del RÃ­o Soto la Marina	TRUE	TRUE	TRUE	TRUE	TRUE	TRUE	TRUE	TRUE	TRUE	TRUE
236	236255571	Avicennia	germinans	Avicennia germinans	-97.767	22.1		MX	Tampico Alto	Rivera, La	TRUE	TRUE	TRUE	TRUE	TRUE	TRUE	TRUE	TRUE	TRUE	TRUE
237	145056225	Avicennia	germinans	Avicennia germinans	-97.767	22.1		MX	TAMPICO ALTO	Rivera, La	TRUE	TRUE	TRUE	TRUE	TRUE	TRUE	TRUE	TRUE	TRUE	TRUE
238	218946861	Avicennia	germinans	Avicennia germinans	-97.7667	23.7869		MX	Soto la Marina	La Pesca, desembocadura del rÃ­o Soto La Marina.	TRUE	TRUE	TRUE	TRUE	TRUE	TRUE	TRUE	TRUE	TRUE	TRUE
239	218946851	Avicennia	germinans	Avicennia germinans	-97.75	23.7869		MX	Soto la Marina	La Pesca, rÃ­o Soto La Marina.	TRUE	TRUE	TRUE	TRUE	TRUE	TRUE	TRUE	TRUE	TRUE	TRUE
240	218947212	Avicennia	germinans	Avicennia germinans	-97.6833	15.9667		MX		Chacahua Bay.	TRUE	TRUE	TRUE	TRUE	TRUE	TRUE	TRUE	TRUE	TRUE	TRUE
241	218946849	Avicennia	germinans	Avicennia germinans	-97.65	21.6261		MX	Tamiahua	Estero Cucharas cerca de su desembocadura en la Laguna de Tamihahua.	TRUE	TRUE	TRUE	TRUE	TRUE	TRUE	TRUE	TRUE	TRUE	TRUE
242	235932880	Avicennia	germinans	Avicennia germinans	-97.447	21.272		MX	TAMIAHUA	TAMIAHUA	TRUE	TRUE	TRUE	TRUE	TRUE	TRUE	TRUE	TRUE	TRUE	TRUE
243	218947433	Avicennia	germinans	Avicennia germinans	-97.4333	21.6347		MX	Tamiahua	Estero Milpas, Laguna de Tamiahua .	TRUE	TRUE	TRUE	TRUE	TRUE	TRUE	TRUE	TRUE	TRUE	TRUE
244	218947106	Avicennia	germinans	Avicennia germinans	-97.4167	21.6069		MX	Tamiahua	Laguna de Tamiahua, estero Aguas Claras, 1 km al N del Faro.	TRUE	TRUE	TRUE	TRUE	TRUE	TRUE	TRUE	TRUE	TRUE	TRUE
245	218946869	Avicennia	germinans	Avicennia germinans	-97.4167	19.4847		MX		Borde N de la Laguna Salada.	TRUE	TRUE	TRUE	TRUE	TRUE	TRUE	TRUE	TRUE	TRUE	TRUE
247	218946852	Avicennia	germinans	Avicennia germinans	-97.35	20.9833		MX	Tuxpan	Tampamachoco, Punta Pipiloya.	TRUE	TRUE	TRUE	TRUE	TRUE	TRUE	TRUE	TRUE	TRUE	TRUE
248	218946790	Avicennia	germinans	Avicennia germinans	-97.35	20.9833		MX	Tuxpan	Laguna de Tampamochoco, cerca de Tuxpan.	TRUE	TRUE	TRUE	TRUE	TRUE	TRUE	TRUE	TRUE	TRUE	TRUE
249	235688380	Avicennia	germinans	Avicennia germinans	-97.205	20.67		MX	CAZONES DE HERRERA	ND	TRUE	TRUE	TRUE	TRUE	TRUE	TRUE	TRUE	TRUE	TRUE	TRUE
250	235688379	Avicennia	germinans	Avicennia germinans	-97.205	20.67		MX	CAZONES DE HERRERA	ND	TRUE	TRUE	TRUE	TRUE	TRUE	TRUE	TRUE	TRUE	TRUE	TRUE
251	235688418	Avicennia	germinans	Avicennia germinans	-97.2	20.733		MX	CAZONES DE HERRERA	Barra Cazones	TRUE	TRUE	TRUE	TRUE	TRUE	TRUE	TRUE	TRUE	TRUE	TRUE
252	218947023	Avicennia	germinans	Avicennia germinans	-97.2	20.7033		MX	Cazones de Herrera	Rancho Nuevo, Estero Boquilla.	TRUE	TRUE	TRUE	TRUE	TRUE	TRUE	TRUE	TRUE	TRUE	TRUE
253	911491425	Avicennia	germinans	Avicennia germinans	-97.1217	27.7672		US			TRUE	TRUE	TRUE	TRUE	TRUE	TRUE	TRUE	TRUE	TRUE	TRUE
255	235688138	Avicennia	germinans	Avicennia germinans	-97	20.483		MX	GUTIERREZ ZAMORA	ND	TRUE	TRUE	TRUE	TRUE	TRUE	TRUE	TRUE	TRUE	TRUE	TRUE
256	218946813	Avicennia	germinans	Avicennia germinans	-96.9333	20.3708		MX	Nautla	DesviaciÃ³n Nautla-Tecolutla.	TRUE	TRUE	TRUE	TRUE	TRUE	TRUE	TRUE	TRUE	TRUE	TRUE
258	235688151	Avicennia	germinans	Avicennia germinans	-96.736	19.536		MX		ND	TRUE	TRUE	TRUE	TRUE	TRUE	TRUE	TRUE	TRUE	TRUE	TRUE
260	145056228	Avicennia	germinans	Avicennia germinans	-96.6	15.7		MX		Chacahua, Lagunas de, Parque Nacional	TRUE	TRUE	TRUE	TRUE	TRUE	TRUE	TRUE	TRUE	TRUE	TRUE
261	236255627	Avicennia	germinans	Avicennia germinans	-96.6	15.7		MX		Chacahua, Lagunas de, Parque Nacional	TRUE	TRUE	TRUE	TRUE	TRUE	TRUE	TRUE	TRUE	TRUE	TRUE
262	235688163	Avicennia	germinans	Avicennia germinans	-96.517	19.917		MX		ND	TRUE	TRUE	TRUE	TRUE	TRUE	TRUE	TRUE	TRUE	TRUE	TRUE
263	218947224	Avicennia	germinans	Avicennia germinans	-96.5167	19.9172		MX		Laguna de San AgustÃ­n, km 71 carretera Nacional Cardel-Nautla.	TRUE	TRUE	TRUE	TRUE	TRUE	TRUE	TRUE	TRUE	TRUE	TRUE
264	235688146	Avicennia	germinans	Avicennia germinans	-96.417	19.717		MX		ND	TRUE	TRUE	TRUE	TRUE	TRUE	TRUE	TRUE	TRUE	TRUE	TRUE
265	235688147	Avicennia	germinans	Avicennia germinans	-96.417	19.717		MX		ND	TRUE	TRUE	TRUE	TRUE	TRUE	TRUE	TRUE	TRUE	TRUE	TRUE
267	218947047	Avicennia	germinans	Avicennia germinans	-96.4	19.6686		MX		Cerro de los Metates.	TRUE	TRUE	TRUE	TRUE	TRUE	TRUE	TRUE	TRUE	TRUE	TRUE
268	218946866	Avicennia	germinans	Avicennia germinans	-96.4	19.625		MX		16 km al S de Palma Sola, Laguna del FarallÃ³n	TRUE	TRUE	TRUE	TRUE	TRUE	TRUE	TRUE	TRUE	TRUE	TRUE
269	235688254	Avicennia	germinans	Avicennia germinans	-96.4	19.622		MX		ND	TRUE	TRUE	TRUE	TRUE	TRUE	TRUE	TRUE	TRUE	TRUE	TRUE
270	235688453	Avicennia	germinans	Avicennia germinans	-96.4	19.622		MX		ND	TRUE	TRUE	TRUE	TRUE	TRUE	TRUE	TRUE	TRUE	TRUE	TRUE
271	218947069	Avicennia	germinans	Avicennia germinans	-96.3833	19.5903		MX		Los Macucos, carretera Cardel-Nautla.	TRUE	TRUE	TRUE	TRUE	TRUE	TRUE	TRUE	TRUE	TRUE	TRUE
272	218946922	Avicennia	germinans	Avicennia germinans	-96.3833	19.5825		MX		EstaciÃ³n BiolÃ³gica El Morro de la Mancha, Laguna de la Mancha.	TRUE	TRUE	TRUE	TRUE	TRUE	TRUE	TRUE	TRUE	TRUE	TRUE
273	235688454	Avicennia	germinans	Avicennia germinans	-96.383	19.6		MX		ND	TRUE	TRUE	TRUE	TRUE	TRUE	TRUE	TRUE	TRUE	TRUE	TRUE
274	235932881	Avicennia	germinans	Avicennia germinans	-96.382	19.595		MX		MANCHA EL PARAISO LA	TRUE	TRUE	TRUE	TRUE	TRUE	TRUE	TRUE	TRUE	TRUE	TRUE
288	218947093	Avicennia	germinans	Avicennia germinans	-96.3667	15.6903		MX		Tahueca, 15 km al E de San Pedro Pochutla.	TRUE	TRUE	TRUE	TRUE	TRUE	TRUE	TRUE	TRUE	TRUE	TRUE
290	235932886	Avicennia	germinans	Avicennia germinans	-96.322	15.834		MX		SANTA MARIA HUATULCO	TRUE	TRUE	TRUE	TRUE	TRUE	TRUE	TRUE	TRUE	TRUE	TRUE
291	370463552	Avicennia	germinans	Avicennia germinans	-96.151	15.755		MX		250 m. despuÃ©s del inicio del parque por la entrada del hotel Viniguenda hacia el basurero municipal.	TRUE	TRUE	TRUE	TRUE	TRUE	TRUE	TRUE	TRUE	TRUE	TRUE
293	218947194	Avicennia	germinans	Avicennia germinans	-96.15	15.8389		MX		Estero de Cacaluta.	TRUE	TRUE	TRUE	TRUE	TRUE	TRUE	TRUE	TRUE	TRUE	TRUE
295	235688289	Avicennia	germinans	Avicennia germinans	-96.077	19.052		MX		Laguna Mandinga	TRUE	TRUE	TRUE	TRUE	TRUE	TRUE	TRUE	TRUE	TRUE	TRUE
296	235688304	Avicennia	germinans	Avicennia germinans	-96.077	19.052		MX		Laguna Mandinga	TRUE	TRUE	TRUE	TRUE	TRUE	TRUE	TRUE	TRUE	TRUE	TRUE
297	218947391	Avicennia	germinans	Avicennia germinans	-96.05	19		MX		Laguna Mandinga.	TRUE	TRUE	TRUE	TRUE	TRUE	TRUE	TRUE	TRUE	TRUE	TRUE
299	235688143	Avicennia	germinans	Avicennia germinans	-96.017	18.983		MX		ND	TRUE	TRUE	TRUE	TRUE	TRUE	TRUE	TRUE	TRUE	TRUE	TRUE
300	236255457	Avicennia	germinans	Avicennia germinans	-96	18.9		MX		Mandinga, Laguna	TRUE	TRUE	TRUE	TRUE	TRUE	TRUE	TRUE	TRUE	TRUE	TRUE
301	145056234	Avicennia	germinans	Avicennia germinans	-96	18.9		MX		Mandinga, Laguna	TRUE	TRUE	TRUE	TRUE	TRUE	TRUE	TRUE	TRUE	TRUE	TRUE
302	218947084	Avicennia	germinans	Avicennia germinans	-95.9833	18.5042		MX		Sontecomapan, 1 km rumbo a la EstaciÃ³n.	TRUE	TRUE	TRUE	TRUE	TRUE	TRUE	TRUE	TRUE	TRUE	TRUE
303	218947431	Avicennia	germinans	Avicennia germinans	-95.9667	15.8283		MX		Barra de La Cruz, 3 km al SO sobre el camino que comunica a playa ZimatÃ¡n.	TRUE	TRUE	TRUE	TRUE	TRUE	TRUE	TRUE	TRUE	TRUE	TRUE
304	218946867	Avicennia	germinans	Avicennia germinans	-95.8833	18.695		MX		Laguna Salada.	TRUE	TRUE	TRUE	TRUE	TRUE	TRUE	TRUE	TRUE	TRUE	TRUE
305	218946874	Avicennia	germinans	Avicennia germinans	-95.8833	18.695		MX		Laguna Salada.	TRUE	TRUE	TRUE	TRUE	TRUE	TRUE	TRUE	TRUE	TRUE	TRUE
306	218946754	Avicennia	germinans	Avicennia germinans	-95.8333	15.8636		MX		Rancho ParaÃ­so, 640 m al S, Distrito Tehuantepec.	TRUE	TRUE	TRUE	TRUE	TRUE	TRUE	TRUE	TRUE	TRUE	TRUE
307	218946976	Avicennia	germinans	Avicennia germinans	-95.7833	18.5861		MX		La Trocha.	TRUE	TRUE	TRUE	TRUE	TRUE	TRUE	TRUE	TRUE	TRUE	TRUE
310	218947169	Avicennia	germinans	Avicennia germinans	-95.6333	15.9867		MX		12 km al E de San Pedro Huamelula, carretera a Salina Cruz, Distrito de Tehuantepe.	TRUE	TRUE	TRUE	TRUE	TRUE	TRUE	TRUE	TRUE	TRUE	TRUE
312	218947060	Avicennia	germinans	Avicennia germinans	-95.3333	16.1028		MX		Playa El Conejo, entrando hacia Playa Brasil, 20 km al SO de Salina Cruz. Distrito Tehuantepec.	TRUE	TRUE	TRUE	TRUE	TRUE	TRUE	TRUE	TRUE	TRUE	TRUE
313	218947080	Avicennia	germinans	Avicennia germinans	-95.3	16.3861		MX		ConcepciÃ³n la Bamba,al N de RincÃ³n Bamba, camino a Carnero, km 91 desde Salina Cruz, al O, Distrito de Tehuantepec.	TRUE	TRUE	TRUE	TRUE	TRUE	TRUE	TRUE	TRUE	TRUE	TRUE
314	235688142	Avicennia	germinans	Avicennia germinans	-95.283	18.583		MX		ND	TRUE	TRUE	TRUE	TRUE	TRUE	TRUE	TRUE	TRUE	TRUE	TRUE
315	236463409	Avicennia	germinans	Avicennia germinans	-95.228	16.181		MX		Salina del MarquÃ©z, 4 km al SO de Salina Cruz, carretera a Pochutla	TRUE	TRUE	TRUE	TRUE	TRUE	TRUE	TRUE	TRUE	TRUE	TRUE
316	145210631	Avicennia	germinans	Avicennia germinans	-95.228	16.181		MX		Salina del MarquÃ©z, 4 km al SO de Salina Cruz, carretera a Pochutla	TRUE	TRUE	TRUE	TRUE	TRUE	TRUE	TRUE	TRUE	TRUE	TRUE
317	218946962	Avicennia	germinans	Avicennia germinans	-95.2	16.2039		MX		Salinas del MarquÃ©s, 10 km al O de Salina Cruz.	TRUE	TRUE	TRUE	TRUE	TRUE	TRUE	TRUE	TRUE	TRUE	TRUE
318	235932885	Avicennia	germinans	Avicennia germinans	-95.2	16.19		MX		SALINA CRUZ	TRUE	TRUE	TRUE	TRUE	TRUE	TRUE	TRUE	TRUE	TRUE	TRUE
319	235688452	Avicennia	germinans	Avicennia germinans	-95.183	18.517		MX		ND	TRUE	TRUE	TRUE	TRUE	TRUE	TRUE	TRUE	TRUE	TRUE	TRUE
320	145210695	Avicennia	germinans	Avicennia germinans	-95.158	16.169		MX		La Ventosa, al S de Salina Cruz	TRUE	TRUE	TRUE	TRUE	TRUE	TRUE	TRUE	TRUE	TRUE	TRUE
321	236463499	Avicennia	germinans	Avicennia germinans	-95.158	16.169		MX		La Ventosa, al S de Salina Cruz	TRUE	TRUE	TRUE	TRUE	TRUE	TRUE	TRUE	TRUE	TRUE	TRUE
322	218947120	Avicennia	germinans	Avicennia germinans	-95.15	16.2083		MX		Playa La Ventosa.	TRUE	TRUE	TRUE	TRUE	TRUE	TRUE	TRUE	TRUE	TRUE	TRUE
323	218947017	Avicennia	germinans	Avicennia germinans	-95.15	16.1711		MX		Beach La Ventosa, on Pacific Ocean about 6 miles E of Salina Cruz.	TRUE	TRUE	TRUE	TRUE	TRUE	TRUE	TRUE	TRUE	TRUE	TRUE
326	218946958	Avicennia	germinans	Avicennia germinans	-95.1167	16.2186		MX		HuazantlÃ¡n, La Salina.	TRUE	TRUE	TRUE	TRUE	TRUE	TRUE	TRUE	TRUE	TRUE	TRUE
327	235688365	Avicennia	germinans	Avicennia germinans	-95.066	18.584		MX		ND	TRUE	TRUE	TRUE	TRUE	TRUE	TRUE	TRUE	TRUE	TRUE	TRUE
328	218947244	Avicennia	germinans	Avicennia germinans	-95.0333	18.5139		MX		Laguna de Sontecomapan, Punta Levista.	TRUE	TRUE	TRUE	TRUE	TRUE	TRUE	TRUE	TRUE	TRUE	TRUE
329	218947239	Avicennia	germinans	Avicennia germinans	-95.0333	18.5139		MX		Laguna de Sontecomapan, Punta Levista.	TRUE	TRUE	TRUE	TRUE	TRUE	TRUE	TRUE	TRUE	TRUE	TRUE
330	235688334	Avicennia	germinans	Avicennia germinans	-95.033	18.502		MX		ND	TRUE	TRUE	TRUE	TRUE	TRUE	TRUE	TRUE	TRUE	TRUE	TRUE
331	218946804	Avicennia	germinans	Avicennia germinans	-95.0167	18.5169		MX		RÃ­o Coxcoapan.	TRUE	TRUE	TRUE	TRUE	TRUE	TRUE	TRUE	TRUE	TRUE	TRUE
332	218946743	Avicennia	germinans	Avicennia germinans	-95.0167	18.5061		MX		RÃ­o Coxcoapan, de la Sierra de San MartÃ­n Pajuapan.	TRUE	TRUE	TRUE	TRUE	TRUE	TRUE	TRUE	TRUE	TRUE	TRUE
333	218946848	Avicennia	germinans	Avicennia germinans	-95.0167	18.5		MX		BahÃ­a de Sontecomapan, RÃ­o Coxcoapan.	TRUE	TRUE	TRUE	TRUE	TRUE	TRUE	TRUE	TRUE	TRUE	TRUE
334	218947254	Avicennia	germinans	Avicennia germinans	-95	18.5167		MX		Laguna de Sontecomapan, transecto entre el estero del Fraile y El Cacahuate.	TRUE	TRUE	TRUE	TRUE	TRUE	TRUE	TRUE	TRUE	TRUE	TRUE
335	218946939	Avicennia	germinans	Avicennia germinans	-94.9667	16.2097		MX		Al O de San Mateo del Mar, Distrito de Tehuantepec.	TRUE	TRUE	TRUE	TRUE	TRUE	TRUE	TRUE	TRUE	TRUE	TRUE
336	235688650	Avicennia	germinans	Avicennia germinans	-94.868	18.239		MX		Las Barrillas-Laguna OstiÃ³n, terracerÃ­a	TRUE	TRUE	TRUE	TRUE	TRUE	TRUE	TRUE	TRUE	TRUE	TRUE
337	218946757	Avicennia	germinans	Avicennia germinans	-94.6333	17.9967		MX		PolvorÃ­n, carretera al PolvorÃ­n - Cosoleacaque.	TRUE	TRUE	TRUE	TRUE	TRUE	TRUE	TRUE	TRUE	TRUE	TRUE
338	235688329	Avicennia	germinans	Avicennia germinans	-94.633	18.183		MX		ND	TRUE	TRUE	TRUE	TRUE	TRUE	TRUE	TRUE	TRUE	TRUE	TRUE
339	235688296	Avicennia	germinans	Avicennia germinans	-94.6	18.183		MX		ND	TRUE	TRUE	TRUE	TRUE	TRUE	TRUE	TRUE	TRUE	TRUE	TRUE
340	218947392	Avicennia	germinans	Avicennia germinans	-94.4667	16.1989		MX		16.6 km al S de San Francisco IxhuatÃ¡n, por el camino a Las Varas.	TRUE	TRUE	TRUE	TRUE	TRUE	TRUE	TRUE	TRUE	TRUE	TRUE
341	218947393	Avicennia	germinans	Avicennia germinans	-94.4667	16.1989		MX		16.6 km al S de San Francisco IxhuatÃ¡n, por el camino a Las Varas.	TRUE	TRUE	TRUE	TRUE	TRUE	TRUE	TRUE	TRUE	TRUE	TRUE
342	235687896	Avicennia	germinans	Avicennia germinans	-94.462	18.102		MX		Ejido El Pantano, El Pantano, despuÃ©s del RÃ­o Calzada	TRUE	TRUE	TRUE	TRUE	TRUE	TRUE	TRUE	TRUE	TRUE	TRUE
343	235932877	Avicennia	germinans	Avicennia germinans	-94.195	16.287		MX		CHAHUITES	TRUE	TRUE	TRUE	TRUE	TRUE	TRUE	TRUE	TRUE	TRUE	TRUE
344	218947200	Avicennia	germinans	Avicennia germinans	-94.1333	18.2064		MX		RÃ­o TonalÃ¡, cerca del arroyo Blasillo.	TRUE	TRUE	TRUE	TRUE	TRUE	TRUE	TRUE	TRUE	TRUE	TRUE
345	319179643	Avicennia	germinans	Avicennia germinans	-94.08	18.1	NORTH_AMERICA	MX		TonalÃ¡, canal dragado por pemex proveniente de La Venta aproximadamente 30 km al norte de Las Choapas	TRUE	TRUE	TRUE	TRUE	TRUE	TRUE	TRUE	TRUE	TRUE	TRUE
346	218947645	Avicennia	germinans	Avicennia germinans	-94.0667	18.0983		MX		RÃ­o TonalÃ¡, canal dragado por PEMEX proveniente de La Venta aproximadamente 30 km al norte de Las Choapas.	TRUE	TRUE	TRUE	TRUE	TRUE	TRUE	TRUE	TRUE	TRUE	TRUE
347	218947566	Avicennia	germinans	Avicennia germinans	-94.0667	18.0983		MX		RÃ­o TonalÃ¡, canal dragado por PEMEX proveniente de La Venta aproximadamente 30 km al norte de Las Choapas.	TRUE	TRUE	TRUE	TRUE	TRUE	TRUE	TRUE	TRUE	TRUE	TRUE
348	218947472	Avicennia	germinans	Avicennia germinans	-94.0667	18.0983		MX		RÃ­o TonalÃ¡, canal dragado por PEMEX proveniente de La Venta aproximadamente 30 km al norte de Las Choapas.	TRUE	TRUE	TRUE	TRUE	TRUE	TRUE	TRUE	TRUE	TRUE	TRUE
349	319179656	Avicennia	germinans	Avicennia germinans	-94.03	18.21	NORTH_AMERICA	MX		laguna Yucateco, borde de la laguna, cerca del muelle de PEMEX y rÃ­o Chicozapote. 10 km al N de la Venta. Creciendo en el borde de la laguna que presenta influencia de agua dulce. Tipo de VegetaciÃ³n: AcuÃ¡tica. Suelo: Arenoso - limoso.	TRUE	TRUE	TRUE	TRUE	TRUE	TRUE	TRUE	TRUE	TRUE	TRUE
350	218947644	Avicennia	germinans	Avicennia germinans	-94.0167	18.2083		MX		Laguna Yucateco, borde de la laguna, cerca del muelle de PEMEX y rÃ­o Chicozapote. 10 km al N de la Venta.	TRUE	TRUE	TRUE	TRUE	TRUE	TRUE	TRUE	TRUE	TRUE	TRUE
351	218946774	Avicennia	germinans	Avicennia germinans	-94.0167	18.2083		MX		Laguna Yucateco, borde de la laguna, cerca del muelle de PEMEX y rÃ­o Chicozapote. 10 km al N de la Venta.	TRUE	TRUE	TRUE	TRUE	TRUE	TRUE	TRUE	TRUE	TRUE	TRUE
352	319179651	Avicennia	germinans	Avicennia germinans	-93.87	16.06	NORTH_AMERICA	MX		Mangrove swamp and silted margins of small stream on the E shore of Mar Muerto, N of ParedÃ³n.	TRUE	TRUE	TRUE	TRUE	TRUE	TRUE	TRUE	TRUE	TRUE	TRUE
353	319179471	Avicennia	germinans	Avicennia germinans	-93.87	16.06	NORTH_AMERICA	MX		Mangrove swamp and silted margins of small stream on the E shore of Mar Muerto, N of ParedÃ³n.	TRUE	TRUE	TRUE	TRUE	TRUE	TRUE	TRUE	TRUE	TRUE	TRUE
354	235932884	Avicennia	germinans	Avicennia germinans	-93.867	16.05		MX		PAREDON	TRUE	TRUE	TRUE	TRUE	TRUE	TRUE	TRUE	TRUE	TRUE	TRUE
355	235932866	Avicennia	germinans	Avicennia germinans	-93.867	16.05		MX		PAREDON	TRUE	TRUE	TRUE	TRUE	TRUE	TRUE	TRUE	TRUE	TRUE	TRUE
356	218946890	Avicennia	germinans	Avicennia germinans	-93.8667	16.0708		MX		E of Mar Muerto, N of ParedÃ³n.	TRUE	TRUE	TRUE	TRUE	TRUE	TRUE	TRUE	TRUE	TRUE	TRUE
357	218946893	Avicennia	germinans	Avicennia germinans	-93.8667	16.0708		MX		E of Mar Muerto, N of ParedÃ³n.	TRUE	TRUE	TRUE	TRUE	TRUE	TRUE	TRUE	TRUE	TRUE	TRUE
360	218947183	Avicennia	germinans	Avicennia germinans	-93.65	18.3636		MX		Manatinero.	TRUE	TRUE	TRUE	TRUE	TRUE	TRUE	TRUE	TRUE	TRUE	TRUE
361	319179619	Avicennia	germinans	Avicennia germinans	-93.63	18.36	NORTH_AMERICA	MX		Laguna la Machona.	TRUE	TRUE	TRUE	TRUE	TRUE	TRUE	TRUE	TRUE	TRUE	TRUE
362	319179470	Avicennia	germinans	Avicennia germinans	-93.4	18.42	NORTH_AMERICA	MX		100 m. de la Barra de Tupilco hacia ParaÃ­so, KM. 24 at N.Oe. de ParaÃ­so.	TRUE	TRUE	TRUE	TRUE	TRUE	TRUE	TRUE	TRUE	TRUE	TRUE
363	218947205	Avicennia	germinans	Avicennia germinans	-93.3667	18.285		MX		Ejido Chicozapote, Comalcalco.	TRUE	TRUE	TRUE	TRUE	TRUE	TRUE	TRUE	TRUE	TRUE	TRUE
364	218947193	Avicennia	germinans	Avicennia germinans	-93.3	15.9978		MX		Las Margaritas.	TRUE	TRUE	TRUE	TRUE	TRUE	TRUE	TRUE	TRUE	TRUE	TRUE
365	319179631	Avicennia	germinans	Avicennia germinans	-93.28	18.42	NORTH_AMERICA	MX		Cerro de Tio Momiro.	TRUE	TRUE	TRUE	TRUE	TRUE	TRUE	TRUE	TRUE	TRUE	TRUE
366	145056231	Avicennia	germinans	Avicennia germinans	-93.25	18.283		MX		ParaÃ­so-CÃ¡rdenas, carretera, KM 25	TRUE	TRUE	TRUE	TRUE	TRUE	TRUE	TRUE	TRUE	TRUE	TRUE
367	236255873	Avicennia	germinans	Avicennia germinans	-93.25	18.283		MX		ParaÃ­so-CÃ¡rdenas, carretera, KM 25	TRUE	TRUE	TRUE	TRUE	TRUE	TRUE	TRUE	TRUE	TRUE	TRUE
368	235687983	Avicennia	germinans	Avicennia germinans	-93.25	15.55		MX		ND	TRUE	TRUE	TRUE	TRUE	TRUE	TRUE	TRUE	TRUE	TRUE	TRUE
371	218947006	Avicennia	germinans	Avicennia germinans	-93.2167	15.5517		MX		Salina atrÃ¡s del Chocohuital.	TRUE	TRUE	TRUE	TRUE	TRUE	TRUE	TRUE	TRUE	TRUE	TRUE
372	319179577	Avicennia	germinans	Avicennia germinans	-93.2	18.41	NORTH_AMERICA	MX		Along coast 3 km E of ParaÃ­so.	TRUE	TRUE	TRUE	TRUE	TRUE	TRUE	TRUE	TRUE	TRUE	TRUE
373	236255950	Avicennia	germinans	Avicennia germinans	-93.2	18.383		MX		ParaÃ­so	TRUE	TRUE	TRUE	TRUE	TRUE	TRUE	TRUE	TRUE	TRUE	TRUE
374	145056224	Avicennia	germinans	Avicennia germinans	-93.2	18.383		MX		ParaÃ­so	TRUE	TRUE	TRUE	TRUE	TRUE	TRUE	TRUE	TRUE	TRUE	TRUE
375	218947025	Avicennia	germinans	Avicennia germinans	-93.1833	18.4042		MX		Puerto Ceiba, Isla Dos Bocas.	TRUE	TRUE	TRUE	TRUE	TRUE	TRUE	TRUE	TRUE	TRUE	TRUE
376	319179668	Avicennia	germinans	Avicennia germinans	-93.17	18.41	NORTH_AMERICA	MX		Puerto Ceiba, Isla Dos Bocas.	TRUE	TRUE	TRUE	TRUE	TRUE	TRUE	TRUE	TRUE	TRUE	TRUE
377	236255884	Avicennia	germinans	Avicennia germinans	-93.167	18.4		MX		Puerto Ceiba, Isla Dos Bocas	TRUE	TRUE	TRUE	TRUE	TRUE	TRUE	TRUE	TRUE	TRUE	TRUE
378	145056233	Avicennia	germinans	Avicennia germinans	-93.167	18.4		MX		Puerto Ceiba, Isla Dos Bocas	TRUE	TRUE	TRUE	TRUE	TRUE	TRUE	TRUE	TRUE	TRUE	TRUE
379	218947293	Avicennia	germinans	Avicennia germinans	-93.1667	18.3625		MX		Km 25 de la carretera MecoacÃ¡n hacia Chiltepec.	TRUE	TRUE	TRUE	TRUE	TRUE	TRUE	TRUE	TRUE	TRUE	TRUE
380	218947252	Avicennia	germinans	Avicennia germinans	-93.1667	18.3614		MX		Laguna de MecoacÃ¡n, 4 km al N de MecoacÃ¡n.	TRUE	TRUE	TRUE	TRUE	TRUE	TRUE	TRUE	TRUE	TRUE	TRUE
381	218947016	Avicennia	germinans	Avicennia germinans	-93.1667	18.3611		MX		Laguna de MecoacÃ¡n, km 25 carretera Paraiso-Cardenas.	TRUE	TRUE	TRUE	TRUE	TRUE	TRUE	TRUE	TRUE	TRUE	TRUE
382	218946756	Avicennia	germinans	Avicennia germinans	-93.1667	18.3611		MX		Laguna de MecoacÃ¡n.	TRUE	TRUE	TRUE	TRUE	TRUE	TRUE	TRUE	TRUE	TRUE	TRUE
383	218946975	Avicennia	germinans	Avicennia germinans	-93.1667	18.3611		MX		Laguna de MecoacÃ¡n, 100 m de la Barra de Tupilco hacia ParaÃ­so, km 24 al NO de ParaÃ­so.	TRUE	TRUE	TRUE	TRUE	TRUE	TRUE	TRUE	TRUE	TRUE	TRUE
384	218947297	Avicennia	germinans	Avicennia germinans	-93.15	18.4247		MX		Bellote.	TRUE	TRUE	TRUE	TRUE	TRUE	TRUE	TRUE	TRUE	TRUE	TRUE
385	235688615	Avicennia	germinans	Avicennia germinans	-93.13	18.392		MX		Laguna de MecoacÃ¡n, km 25 a Chiltepec	TRUE	TRUE	TRUE	TRUE	TRUE	TRUE	TRUE	TRUE	TRUE	TRUE
386	235932869	Avicennia	germinans	Avicennia germinans	-93.082	18.235		MX		MECUACAN	TRUE	TRUE	TRUE	TRUE	TRUE	TRUE	TRUE	TRUE	TRUE	TRUE
387	319179574	Avicennia	germinans	Avicennia germinans	-92.97	18.38	NORTH_AMERICA	MX		A orillas de la Laguna BayazÃº, llegando por el RÃ­o Gonzalez. Manglar (moribundo por desecaciÃ³n)	TRUE	TRUE	TRUE	TRUE	TRUE	TRUE	TRUE	TRUE	TRUE	TRUE
388	218947383	Avicennia	germinans	Avicennia germinans	-92.9667	18.3947		MX		Laguna BayasÃº, llegando por el rÃ­o GonzÃ¡lez.	TRUE	TRUE	TRUE	TRUE	TRUE	TRUE	TRUE	TRUE	TRUE	TRUE
389	218947221	Avicennia	germinans	Avicennia germinans	-92.8	15.2044		MX		0.5 km antes de llegar a La Palma.	TRUE	TRUE	TRUE	TRUE	TRUE	TRUE	TRUE	TRUE	TRUE	TRUE
390	218947280	Avicennia	germinans	Avicennia germinans	-92.7833	15.2242		MX		Las Garzas, Acapetahua.	TRUE	TRUE	TRUE	TRUE	TRUE	TRUE	TRUE	TRUE	TRUE	TRUE
391	319179644	Avicennia	germinans	Avicennia germinans	-92.69	18.49	NORTH_AMERICA	MX		Reserva dela BÃ­osfera Pantanos de Centla. Canal que comunica a la Laguna del Coco. Mpio. Centla. 2 m. Creciendo al lado de un canal. Tipo de VegetaciÃ³n: acuÃ¡tica. Suelo: arcilloso - limoso.	TRUE	TRUE	TRUE	TRUE	TRUE	TRUE	TRUE	TRUE	TRUE	TRUE
392	218946768	Avicennia	germinans	Avicennia germinans	-92.6833	18.4922		MX		Canal que comunica a la Laguna del Coco.	TRUE	TRUE	TRUE	TRUE	TRUE	TRUE	TRUE	TRUE	TRUE	TRUE
393	319179616	Avicennia	germinans	Avicennia germinans	-92.66	18.52	NORTH_AMERICA	MX		Paso San RomÃ¡n, municipio Frontera.	TRUE	TRUE	TRUE	TRUE	TRUE	TRUE	TRUE	TRUE	TRUE	TRUE
394	235932870	Avicennia	germinans	Avicennia germinans	-92.657	18.515		MX		SAN ROMAN	TRUE	TRUE	TRUE	TRUE	TRUE	TRUE	TRUE	TRUE	TRUE	TRUE
395	218947240	Avicennia	germinans	Avicennia germinans	-92.65	18.5181		MX		Paso San RomÃ¡n.	TRUE	TRUE	TRUE	TRUE	TRUE	TRUE	TRUE	TRUE	TRUE	TRUE
396	235932865	Avicennia	germinans	Avicennia germinans	-92.646	18.534		MX		FRONTERA	TRUE	TRUE	TRUE	TRUE	TRUE	TRUE	TRUE	TRUE	TRUE	TRUE
397	218947119	Avicennia	germinans	Avicennia germinans	-92.5667	18.58		MX		Playa BoquerÃ³n, 20 km al E de Frontera, a 100 m de la playa.	TRUE	TRUE	TRUE	TRUE	TRUE	TRUE	TRUE	TRUE	TRUE	TRUE
398	370935220	Avicennia	germinans	Avicennia germinans	-92.517	18.656		MX		Playa BoquerÃ³n	TRUE	TRUE	TRUE	TRUE	TRUE	TRUE	TRUE	TRUE	TRUE	TRUE
399	370948038	Avicennia	germinans	Avicennia germinans	-92.513	18.553		MX		Ejido Nuevo Centla	TRUE	TRUE	TRUE	TRUE	TRUE	TRUE	TRUE	TRUE	TRUE	TRUE
400	218947379	Avicennia	germinans	Avicennia germinans	-92.5	18.5528		MX		Ejido Nuevo Centla, antes Playa BoquerÃ³n.	TRUE	TRUE	TRUE	TRUE	TRUE	TRUE	TRUE	TRUE	TRUE	TRUE
402	236256038	Avicennia	germinans	Avicennia germinans	-92.417	18.533		MX		Frontera, 20 KM E, Playa BoquerÃ³n	TRUE	TRUE	TRUE	TRUE	TRUE	TRUE	TRUE	TRUE	TRUE	TRUE
403	145055778	Avicennia	germinans	Avicennia germinans	-92.417	18.533		MX		Frontera, 20 KM E, Playa BoquerÃ³n	TRUE	TRUE	TRUE	TRUE	TRUE	TRUE	TRUE	TRUE	TRUE	TRUE
404	235687970	Avicennia	germinans	Avicennia germinans	-92.417	14.75		MX		ND	TRUE	TRUE	TRUE	TRUE	TRUE	TRUE	TRUE	TRUE	TRUE	TRUE
408	218947272	Avicennia	germinans	Avicennia germinans	-92.4	14.7192		MX		Puerto Madero.	TRUE	TRUE	TRUE	TRUE	TRUE	TRUE	TRUE	TRUE	TRUE	TRUE
409	371202805	Avicennia	germinans	Avicennia germinans	-92.256	18.675		MX		6.5 kilÃ³metros hacia el almacÃ©n de cloro y gas carretera Nuevo Progreso-Ciudad del Carmen en crucero de planta de nitrÃ³geno	TRUE	TRUE	TRUE	TRUE	TRUE	TRUE	TRUE	TRUE	TRUE	TRUE
412	371192917	Avicennia	germinans	Avicennia germinans	-92.166	18.684		MX		4 kilÃ³metros al este del pozo de PEMEX despuÃ©s del crucero de Atasta rumbo a la playa	TRUE	TRUE	TRUE	TRUE	TRUE	TRUE	TRUE	TRUE	TRUE	TRUE
413	371192950	Avicennia	germinans	Avicennia germinans	-92.161	18.64		MX		3 kilÃ³metros al este del crucero de la carretera Atasta-Ciudad del Carmen, crucero en pozo de PEMEX	TRUE	TRUE	TRUE	TRUE	TRUE	TRUE	TRUE	TRUE	TRUE	TRUE
414	371192723	Avicennia	germinans	Avicennia germinans	-92.068	18.62		MX		Laguna de Atasta al margen de la laguna en el poblado de Atasta	TRUE	TRUE	TRUE	TRUE	TRUE	TRUE	TRUE	TRUE	TRUE	TRUE
415	371192475	Avicennia	germinans	Avicennia germinans	-92.046	18.621		MX		Puente cerrillos	TRUE	TRUE	TRUE	TRUE	TRUE	TRUE	TRUE	TRUE	TRUE	TRUE
416	371200657	Avicennia	germinans	Avicennia germinans	-92.045	18.522		MX		Canal arroyo Palancar	TRUE	TRUE	TRUE	TRUE	TRUE	TRUE	TRUE	TRUE	TRUE	TRUE
417	218947195	Avicennia	germinans	Avicennia germinans	-92.0333	16.1306		MX		Estero La LÃ­nea.	TRUE	TRUE	TRUE	TRUE	TRUE	TRUE	TRUE	TRUE	TRUE	TRUE
418	319179965	Avicennia	germinans	Avicennia germinans	-92.03	14.39	NORTH_AMERICA	GT		El ManchÃ³n	TRUE	TRUE	TRUE	TRUE	TRUE	TRUE	TRUE	TRUE	TRUE	TRUE
419	371190890	Avicennia	germinans	Avicennia germinans	-92.016	18.62		MX		3 kilÃ³metros de Puerto Rico en Rancho la Piedra	TRUE	TRUE	TRUE	TRUE	TRUE	TRUE	TRUE	TRUE	TRUE	TRUE
423	371196507	Avicennia	germinans	Avicennia germinans	-91.964	18.602		MX		Pozo Xicalango	TRUE	TRUE	TRUE	TRUE	TRUE	TRUE	TRUE	TRUE	TRUE	TRUE
424	371196229	Avicennia	germinans	Avicennia germinans	-91.959	18.678		MX		4 kilÃ³metros al norte del Rancho las Araucarias	TRUE	TRUE	TRUE	TRUE	TRUE	TRUE	TRUE	TRUE	TRUE	TRUE
425	371192315	Avicennia	germinans	Avicennia germinans	-91.956	18.648		MX		2 kilÃ³metros al noreste del Rancho el Ãngel	TRUE	TRUE	TRUE	TRUE	TRUE	TRUE	TRUE	TRUE	TRUE	TRUE
426	371192223	Avicennia	germinans	Avicennia germinans	-91.954	18.688		MX		6 kilÃ³metros del Rancho las Araucarias camino al mar	TRUE	TRUE	TRUE	TRUE	TRUE	TRUE	TRUE	TRUE	TRUE	TRUE
427	371192136	Avicennia	germinans	Avicennia germinans	-91.952	18.693		MX		10 kilÃ³metros del Rancho las Araucarias en la playa	TRUE	TRUE	TRUE	TRUE	TRUE	TRUE	TRUE	TRUE	TRUE	TRUE
428	371196137	Avicennia	germinans	Avicennia germinans	-91.939	18.619		MX		Sistema lagunar TÃ©rminos laguna puerto rico	TRUE	TRUE	TRUE	TRUE	TRUE	TRUE	TRUE	TRUE	TRUE	TRUE
432	371199480	Avicennia	germinans	Avicennia germinans	-91.889	18.622		MX		Carretera Ciudad del Carmen-Frontera en Nuevo Campechito	TRUE	TRUE	TRUE	TRUE	TRUE	TRUE	TRUE	TRUE	TRUE	TRUE
443	236462962	Avicennia	germinans	Avicennia germinans	-91.779	18.462		MX		Punta Cochinitos, Boca de la Laguna San Francisco	TRUE	TRUE	TRUE	TRUE	TRUE	TRUE	TRUE	TRUE	TRUE	TRUE
444	145210226	Avicennia	germinans	Avicennia germinans	-91.779	18.462		MX		Punta Cochinitos, Boca de la Laguna San Francisco	TRUE	TRUE	TRUE	TRUE	TRUE	TRUE	TRUE	TRUE	TRUE	TRUE
445	236256090	Avicennia	germinans	Avicennia germinans	-91.767	18.433		MX		Cochinitos, Punta; Laguna San Francisco	TRUE	TRUE	TRUE	TRUE	TRUE	TRUE	TRUE	TRUE	TRUE	TRUE
446	145055770	Avicennia	germinans	Avicennia germinans	-91.767	18.433		MX		Cochinitos, Punta; Laguna San Francisco	TRUE	TRUE	TRUE	TRUE	TRUE	TRUE	TRUE	TRUE	TRUE	TRUE
447	218947109	Avicennia	germinans	Avicennia germinans	-91.7667	18.4569		MX		Punta Cochinitos, por el lado de la laguna San Francisco.	TRUE	TRUE	TRUE	TRUE	TRUE	TRUE	TRUE	TRUE	TRUE	TRUE
448	218946907	Avicennia	germinans	Avicennia germinans	-91.75	18.4569		MX		Puerto Real.	TRUE	TRUE	TRUE	TRUE	TRUE	TRUE	TRUE	TRUE	TRUE	TRUE
449	236462904	Avicennia	germinans	Avicennia germinans	-91.75	18.353		MX		Laguna San Francisco, Sobre la costa de laguna	TRUE	TRUE	TRUE	TRUE	TRUE	TRUE	TRUE	TRUE	TRUE	TRUE
450	145210168	Avicennia	germinans	Avicennia germinans	-91.75	18.353		MX		Laguna San Francisco, Sobre la costa de laguna	TRUE	TRUE	TRUE	TRUE	TRUE	TRUE	TRUE	TRUE	TRUE	TRUE
451	218947112	Avicennia	germinans	Avicennia germinans	-91.75	18.3503		MX		Laguna San Francisco.	TRUE	TRUE	TRUE	TRUE	TRUE	TRUE	TRUE	TRUE	TRUE	TRUE
452	235933570	Avicennia	germinans	Avicennia germinans	-91.75	18.35		MX		LAGUNA SAN FRANCISCO	TRUE	TRUE	TRUE	TRUE	TRUE	TRUE	TRUE	TRUE	TRUE	TRUE
456	371195909	Avicennia	germinans	Avicennia germinans	-91.667	18.713		MX		1 kilÃ³metro despuÃ©s de CASE a la orilla de la carretera	TRUE	TRUE	TRUE	TRUE	TRUE	TRUE	TRUE	TRUE	TRUE	TRUE
457	218946937	Avicennia	germinans	Avicennia germinans	-91.6667	18.4514		MX		Isla del Carmen.	TRUE	TRUE	TRUE	TRUE	TRUE	TRUE	TRUE	TRUE	TRUE	TRUE
463	371195817	Avicennia	germinans	Avicennia germinans	-91.6	18.748		MX		KilÃ³metro 30 carretera Ciudad del Carmen-Isla aguada	TRUE	TRUE	TRUE	TRUE	TRUE	TRUE	TRUE	TRUE	TRUE	TRUE
464	371188081	Avicennia	germinans	Avicennia germinans	-91.6	18.748		MX		KilÃ³metro 30 carretera Ciudad del Carmen-Isla aguada	TRUE	TRUE	TRUE	TRUE	TRUE	TRUE	TRUE	TRUE	TRUE	TRUE
465	371205045	Avicennia	germinans	Avicennia germinans	-91.583	18.437		MX		5 kilÃ³metros al este de la boca de Balchaca, boca de rÃ­o Chumpan	TRUE	TRUE	TRUE	TRUE	TRUE	TRUE	TRUE	TRUE	TRUE	TRUE
466	371205311	Avicennia	germinans	Avicennia germinans	-91.578	18.432		MX		25 kilÃ³metros al sur de Boca de Balchaca en Rancho Quemado	TRUE	TRUE	TRUE	TRUE	TRUE	TRUE	TRUE	TRUE	TRUE	TRUE
467	371203853	Avicennia	germinans	Avicennia germinans	-91.578	18.429		MX		5 kilÃ³metros al este de Ciudad del Carmen en boca estero Pargo en el margen del estero	TRUE	TRUE	TRUE	TRUE	TRUE	TRUE	TRUE	TRUE	TRUE	TRUE
468	371205518	Avicennia	germinans	Avicennia germinans	-91.573	18.428		MX		8 kilÃ³metros al suroeste de boca de Balchaca al margen de la laguna 5 de mayo	TRUE	TRUE	TRUE	TRUE	TRUE	TRUE	TRUE	TRUE	TRUE	TRUE
470	371188514	Avicennia	germinans	Avicennia germinans	-91.559	18.764		MX		KilÃ³metro 37 carretera Isla aguada-Ciudad del Carmen	TRUE	TRUE	TRUE	TRUE	TRUE	TRUE	TRUE	TRUE	TRUE	TRUE
472	371205162	Avicennia	germinans	Avicennia germinans	-91.522	18.448		MX		36 kilÃ³metros al sureste de Ciudad del Carmen boca de Balchaca	TRUE	TRUE	TRUE	TRUE	TRUE	TRUE	TRUE	TRUE	TRUE	TRUE
473	371205225	Avicennia	germinans	Avicennia germinans	-91.52	18.435		MX		10 kilÃ³metros al sur de Boca de Balchaca en Isla el DesengaÃ±o sobre rÃ­o Chumpan	TRUE	TRUE	TRUE	TRUE	TRUE	TRUE	TRUE	TRUE	TRUE	TRUE
475	371205488	Avicennia	germinans	Avicennia germinans	-91.468	18.473		MX		5 kilÃ³metros al norte de la Boca de Balchaca en la laguna Balchaca	TRUE	TRUE	TRUE	TRUE	TRUE	TRUE	TRUE	TRUE	TRUE	TRUE
476	371205414	Avicennia	germinans	Avicennia germinans	-91.467	18.479		MX		5 kilÃ³metros al norte de la Boca de Balchaca en la laguna Balchaca	TRUE	TRUE	TRUE	TRUE	TRUE	TRUE	TRUE	TRUE	TRUE	TRUE
478	371194178	Avicennia	germinans	Avicennia germinans	-91.397	18.888		MX		25 kilÃ³metros del crucero de Sabancuy carretera Sabancuy-Ciudad del Carmen	TRUE	TRUE	TRUE	TRUE	TRUE	TRUE	TRUE	TRUE	TRUE	TRUE
482	371207161	Avicennia	germinans	Avicennia germinans	-91.362	18.798		MX		4 kilÃ³metros al norte de punta Piedra en punta Moloncito	TRUE	TRUE	TRUE	TRUE	TRUE	TRUE	TRUE	TRUE	TRUE	TRUE
486	371205725	Avicennia	germinans	Avicennia germinans	-91.338	18.894		MX		20 kilÃ³metros al sur de Sabancuy en el estero de Sabancuy	TRUE	TRUE	TRUE	TRUE	TRUE	TRUE	TRUE	TRUE	TRUE	TRUE
489	218947432	Avicennia	germinans	Avicennia germinans	-91.25	18.6133		MX		Laguna de TÃ©rminos, cerca de Boca Panlau.	TRUE	TRUE	TRUE	TRUE	TRUE	TRUE	TRUE	TRUE	TRUE	TRUE
490	371186629	Avicennia	germinans	Avicennia germinans	-91.189	18.97		MX		Calle ConstituciÃ³n frente a la Sociedad Cooperativa BoquerÃ³n, en las orillas del estero de Sabancuy	TRUE	TRUE	TRUE	TRUE	TRUE	TRUE	TRUE	TRUE	TRUE	TRUE
491	371186565	Avicennia	germinans	Avicennia germinans	-91.189	18.97		MX		Calle ConstituciÃ³n frente a la Sociedad Cooperativa BoquerÃ³n, en las orillas del estero de Sabancuy	TRUE	TRUE	TRUE	TRUE	TRUE	TRUE	TRUE	TRUE	TRUE	TRUE
492	371183677	Avicennia	germinans	Avicennia germinans	-91.187	18.986		MX		500 metros despuÃ©s de la desviaciÃ³n a la carretera de Ciudad del Carmen en el margen de la laguna	TRUE	TRUE	TRUE	TRUE	TRUE	TRUE	TRUE	TRUE	TRUE	TRUE
493	218947054	Avicennia	germinans	Avicennia germinans	-91.1833	18.9883		MX		Between Sabancuy and Ciudad del Carmen.	TRUE	TRUE	TRUE	TRUE	TRUE	TRUE	TRUE	TRUE	TRUE	TRUE
494	371183535	Avicennia	germinans	Avicennia germinans	-91.183	18.979		MX		1 kilÃ³metro antes de Sabancuy sobre el Puente Sabancuy	TRUE	TRUE	TRUE	TRUE	TRUE	TRUE	TRUE	TRUE	TRUE	TRUE
495	371186267	Avicennia	germinans	Avicennia germinans	-91.182	18.973		MX		Camino sobre el malecÃ³n en el poblado de Sabancuy frente del mercado	TRUE	TRUE	TRUE	TRUE	TRUE	TRUE	TRUE	TRUE	TRUE	TRUE
496	371184320	Avicennia	germinans	Avicennia germinans	-91.168	18.98		MX		1.2 kilÃ³metros al este del poblado de Sabancuy sobre la carretera Sabancuy-EscÃ¡rcega	TRUE	TRUE	TRUE	TRUE	TRUE	TRUE	TRUE	TRUE	TRUE	TRUE
497	371184636	Avicennia	germinans	Avicennia germinans	-91.163	18.983		MX		1.5 kilÃ³metros de Sabancuy sobre la calle Marina	TRUE	TRUE	TRUE	TRUE	TRUE	TRUE	TRUE	TRUE	TRUE	TRUE
498	371187421	Avicennia	germinans	Avicennia germinans	-91.151	18.989		MX		3 kilÃ³metros del poblado de Sabancuy en el paraje el Cocal sobre la carretera marina	TRUE	TRUE	TRUE	TRUE	TRUE	TRUE	TRUE	TRUE	TRUE	TRUE
499	370970535	Avicennia	germinans	Avicennia germinans	-91.15	19.01		MX		5 km al NE de Sabankuy	TRUE	TRUE	TRUE	TRUE	TRUE	TRUE	TRUE	TRUE	TRUE	TRUE
500	371183791	Avicennia	germinans	Avicennia germinans	-91.147	18.99		MX		4 kilÃ³metros al norte del poblado de Sabancuy sobre la calle Marina carretera de terracerÃ­a	TRUE	TRUE	TRUE	TRUE	TRUE	TRUE	TRUE	TRUE	TRUE	TRUE
501	371182024	Avicennia	germinans	Avicennia germinans	-91.117	19.007		MX		5 kilÃ³metros al noreste de Sabancuy	TRUE	TRUE	TRUE	TRUE	TRUE	TRUE	TRUE	TRUE	TRUE	TRUE
502	371191715	Avicennia	germinans	Avicennia germinans	-91.095	19.022		MX		3.4 kilÃ³metros de la carretera a Champoton en rancho Nohan	TRUE	TRUE	TRUE	TRUE	TRUE	TRUE	TRUE	TRUE	TRUE	TRUE
503	235687944	Avicennia	germinans	Avicennia germinans	-90.783	19.2		MX		Camino a El Zapote, 4 km del entronque con la carretera Campeche-ChampotÃ³n	TRUE	TRUE	TRUE	TRUE	TRUE	TRUE	TRUE	TRUE	TRUE	TRUE
504	236462981	Avicennia	germinans	Avicennia germinans	-90.724	19.403		MX		6 km al NE de ChampotÃ³n sobre la carr. Ciudad del Carmen-Campeche	TRUE	TRUE	TRUE	TRUE	TRUE	TRUE	TRUE	TRUE	TRUE	TRUE
505	145210245	Avicennia	germinans	Avicennia germinans	-90.724	19.403		MX		6 km al NE de ChampotÃ³n sobre la carr. Ciudad del Carmen-Campeche	TRUE	TRUE	TRUE	TRUE	TRUE	TRUE	TRUE	TRUE	TRUE	TRUE
506	235932882	Avicennia	germinans	Avicennia germinans	-90.722	19.355		MX		CHAMPOTON	TRUE	TRUE	TRUE	TRUE	TRUE	TRUE	TRUE	TRUE	TRUE	TRUE
507	371098269	Avicennia	germinans	Avicennia germinans	-90.717	19.333		MX		Camino a El Zapote	TRUE	TRUE	TRUE	TRUE	TRUE	TRUE	TRUE	TRUE	TRUE	TRUE
508	218947061	Avicennia	germinans	Avicennia germinans	-90.7	19.4208		MX		6 km al NE de ChampotÃ³n, carretera Ciudad del Carmen.	TRUE	TRUE	TRUE	TRUE	TRUE	TRUE	TRUE	TRUE	TRUE	TRUE
509	145210238	Avicennia	germinans	Avicennia germinans	-90.689	19.364		MX		Camino a El Zapote ca. 4 km desde el entronque con la carr. Campeche-ChampotÃ³n	TRUE	TRUE	TRUE	TRUE	TRUE	TRUE	TRUE	TRUE	TRUE	TRUE
510	236462974	Avicennia	germinans	Avicennia germinans	-90.689	19.364		MX		Camino a El Zapote ca. 4 km desde el entronque con la carr. Campeche-ChampotÃ³n	TRUE	TRUE	TRUE	TRUE	TRUE	TRUE	TRUE	TRUE	TRUE	TRUE
511	235687945	Avicennia	germinans	Avicennia germinans	-90.667	19.417		MX		6 km al NE de ChampotÃ³n, carretera a Ciudad del Carmen	TRUE	TRUE	TRUE	TRUE	TRUE	TRUE	TRUE	TRUE	TRUE	TRUE
512	218947029	Avicennia	germinans	Avicennia germinans	-90.6333	19.3375		MX		Camino a El Zapote, km 4 desde el entronque con la carretera Campeche-ChampotÃ³n.	TRUE	TRUE	TRUE	TRUE	TRUE	TRUE	TRUE	TRUE	TRUE	TRUE
514	218947162	Avicennia	germinans	Avicennia germinans	-90.5167	19.8422		MX		Costa al S de Campeche.	TRUE	TRUE	TRUE	TRUE	TRUE	TRUE	TRUE	TRUE	TRUE	TRUE
515	218946889	Avicennia	germinans	Avicennia germinans	-90.5167	19.8403		MX		Carretera a ChampotÃ³n.	TRUE	TRUE	TRUE	TRUE	TRUE	TRUE	TRUE	TRUE	TRUE	TRUE
518	891775603	Avicennia	germinans	Avicennia germinans	-90.4825	20.022		MX			TRUE	TRUE	TRUE	TRUE	TRUE	TRUE	TRUE	TRUE	TRUE	TRUE
519	370970398	Avicennia	germinans	Avicennia germinans	-90.478	19.883		MX		Palmas, 2 km al NE de Ciudad de Campeche	TRUE	TRUE	TRUE	TRUE	TRUE	TRUE	TRUE	TRUE	TRUE	TRUE
520	370970447	Avicennia	germinans	Avicennia germinans	-90.478	19.883		MX		Palmas, 2 km al NE de Ciudad de Campeche	TRUE	TRUE	TRUE	TRUE	TRUE	TRUE	TRUE	TRUE	TRUE	TRUE
521	370970420	Avicennia	germinans	Avicennia germinans	-90.478	19.883		MX		Palmas, 2 km al NE de Ciudad de Campeche	TRUE	TRUE	TRUE	TRUE	TRUE	TRUE	TRUE	TRUE	TRUE	TRUE
522	370970376	Avicennia	germinans	Avicennia germinans	-90.477	20.095		MX		Granja Camaronera de Tenabo, entre el km 27 y el mar	TRUE	TRUE	TRUE	TRUE	TRUE	TRUE	TRUE	TRUE	TRUE	TRUE
523	370977546	Avicennia	germinans	Avicennia germinans	-90.442	19.919		MX		2.5 km al O de San Fancisco KobÃ©n	TRUE	TRUE	TRUE	TRUE	TRUE	TRUE	TRUE	TRUE	TRUE	TRUE
524	145210174	Avicennia	germinans	Avicennia germinans	-90.426	20.192		MX		30 km al O de Hecelchakan, camino a Isla Jaina	TRUE	TRUE	TRUE	TRUE	TRUE	TRUE	TRUE	TRUE	TRUE	TRUE
525	236462910	Avicennia	germinans	Avicennia germinans	-90.426	20.192		MX		30 km al O de Hecelchakan, camino a Isla Jaina	TRUE	TRUE	TRUE	TRUE	TRUE	TRUE	TRUE	TRUE	TRUE	TRUE
526	145055771	Avicennia	germinans	Avicennia germinans	-90.417	20.617		MX	CALKINI	TankuchÃ©, 27 KM de; Isla Arena	TRUE	TRUE	TRUE	TRUE	TRUE	TRUE	TRUE	TRUE	TRUE	TRUE
527	236255979	Avicennia	germinans	Avicennia germinans	-90.417	20.617		MX	Calkini	TankuchÃ©, 27 KM de; Isla Arena	TRUE	TRUE	TRUE	TRUE	TRUE	TRUE	TRUE	TRUE	TRUE	TRUE
528	235687946	Avicennia	germinans	Avicennia germinans	-90.417	20.5		MX	CALKINI	Isla Punta Arena	TRUE	TRUE	TRUE	TRUE	TRUE	TRUE	TRUE	TRUE	TRUE	TRUE
529	218947139	Avicennia	germinans	Avicennia germinans	-90.4167	20.6236		MX	Calkini	27 km de Tan KuÂ´che-Isla Arena.	TRUE	TRUE	TRUE	TRUE	TRUE	TRUE	TRUE	TRUE	TRUE	TRUE
530	218947078	Avicennia	germinans	Avicennia germinans	-90.4167	20.1806		MX		Isla de Jaina, 54 km al O de Hecelchacan.	TRUE	TRUE	TRUE	TRUE	TRUE	TRUE	TRUE	TRUE	TRUE	TRUE
531	235688030	Avicennia	germinans	Avicennia germinans	-90.4	20.233		MX	HECELCHAKAN	ND	TRUE	TRUE	TRUE	TRUE	TRUE	TRUE	TRUE	TRUE	TRUE	TRUE
532	371099049	Avicennia	germinans	Avicennia germinans	-90.4	20.233		MX	HecelchakÃ¡n	6 Km antes de la costa, en la carretera Isla de Jaina-Pomuch	TRUE	TRUE	TRUE	TRUE	TRUE	TRUE	TRUE	TRUE	TRUE	TRUE
533	370970479	Avicennia	germinans	Avicennia germinans	-90.378	20.533		MX	CALKINI	El Remate	TRUE	TRUE	TRUE	TRUE	TRUE	TRUE	TRUE	TRUE	TRUE	TRUE
534	370970518	Avicennia	germinans	Avicennia germinans	-90.378	20.533		MX	CALKINI	El Remate	TRUE	TRUE	TRUE	TRUE	TRUE	TRUE	TRUE	TRUE	TRUE	TRUE
535	319179549	Avicennia	germinans	Avicennia germinans	-90.37	20.16	NORTH_AMERICA	MX		A 30 km al O de Hecelchakan, camino a Isla Jaina. Zona de manglares y petenes	TRUE	TRUE	TRUE	TRUE	TRUE	TRUE	TRUE	TRUE	TRUE	TRUE
536	218947305	Avicennia	germinans	Avicennia germinans	-90.3667	20.8964		MX	Celestun	San JoaquÃ­n, 5 km de CelestÃºn.	TRUE	TRUE	TRUE	TRUE	TRUE	TRUE	TRUE	TRUE	TRUE	TRUE
538	236462966	Avicennia	germinans	Avicennia germinans	-90.317	20.85		MX	CELESTUN	8 km al E de CelestÃºn en un borde inundado y abierto de Manglar	TRUE	TRUE	TRUE	TRUE	TRUE	TRUE	TRUE	TRUE	TRUE	TRUE
539	145210230	Avicennia	germinans	Avicennia germinans	-90.317	20.85		MX	CELESTUN	8 km al E de CelestÃºn en un borde inundado y abierto de Manglar	TRUE	TRUE	TRUE	TRUE	TRUE	TRUE	TRUE	TRUE	TRUE	TRUE
540	218947304	Avicennia	germinans	Avicennia germinans	-90.3	20.8556		MX	Celestun	4 km de CelestÃºn, camino CelestÃºn, Puerta Palmar.	TRUE	TRUE	TRUE	TRUE	TRUE	TRUE	TRUE	TRUE	TRUE	TRUE
541	319179399	Avicennia	germinans	Avicennia germinans	-90.3	-0.74	SOUTH_AMERICA	EC		Charles Darwin Research Station	TRUE	TRUE	TRUE	TRUE	TRUE	TRUE	TRUE	TRUE	TRUE	TRUE
542	371090738	Avicennia	germinans	Avicennia germinans	-90.267	21.05		MX	CelestÃºn	El Palmar	TRUE	TRUE	TRUE	TRUE	TRUE	TRUE	TRUE	TRUE	TRUE	TRUE
543	371092027	Avicennia	germinans	Avicennia germinans	-90.267	20.867		MX	CelestÃºn	CelestÃºn-Bellaflor Km 16	TRUE	TRUE	TRUE	TRUE	TRUE	TRUE	TRUE	TRUE	TRUE	TRUE
545	218947131	Avicennia	germinans	Avicennia germinans	-90.2	20.3694		MX	Hecelchakan	30 km al O de Hecelchakan, camino a Isla Jaina.	TRUE	TRUE	TRUE	TRUE	TRUE	TRUE	TRUE	TRUE	TRUE	TRUE
550	415960220	Avicennia	germinans	Avicennia germinans	-90.1945	29.4058		US	Lafourche Parish	Gulf of Mexico, South of Leeville, Louisiana	TRUE	TRUE	TRUE	TRUE	TRUE	TRUE	TRUE	TRUE	TRUE	TRUE
551	370970353	Avicennia	germinans	Avicennia germinans	-90.166	19.912		MX		2 km al S de La Hacienda Chilip	TRUE	TRUE	TRUE	TRUE	TRUE	TRUE	TRUE	TRUE	TRUE	TRUE
552	218946802	Avicennia	germinans	Avicennia germinans	-90.1333	18.9708		MX		5 km al NE de Sabancuy.	TRUE	TRUE	TRUE	TRUE	TRUE	TRUE	TRUE	TRUE	TRUE	TRUE
554	319179704	Avicennia	germinans	Avicennia germinans	-90.03	21.17	NORTH_AMERICA	MX	HunucmÃ¡	Sisal.	TRUE	TRUE	TRUE	TRUE	TRUE	TRUE	TRUE	TRUE	TRUE	TRUE
555	371102697	Avicennia	germinans	Avicennia germinans	-90.017	21.133		MX	HunucmÃ¡	Sisal-HunucmÃ¡ Km 4	TRUE	TRUE	TRUE	TRUE	TRUE	TRUE	TRUE	TRUE	TRUE	TRUE
556	218946997	Avicennia	germinans	Avicennia germinans	-90	21.1278		MX	Hunucma	4 km de SisÃ¡l, viniendo de HunucmÃ¡.	TRUE	TRUE	TRUE	TRUE	TRUE	TRUE	TRUE	TRUE	TRUE	TRUE
557	371091919	Avicennia	germinans	Avicennia germinans	-90	20.583		MX	MaxcanÃº	MaxcanÃº	TRUE	TRUE	TRUE	TRUE	TRUE	TRUE	TRUE	TRUE	TRUE	TRUE
558	319179580	Avicennia	germinans	Avicennia germinans	-90	13.7	NORTH_AMERICA	SV		Santuario de las Aves	TRUE	TRUE	TRUE	TRUE	TRUE	TRUE	TRUE	TRUE	TRUE	TRUE
559	218946992	Avicennia	germinans	Avicennia germinans	-89.9833	21.1133		MX	Hunucma	8 km de SisÃ¡l, al E saliendo de HunucmÃ¡.	TRUE	TRUE	TRUE	TRUE	TRUE	TRUE	TRUE	TRUE	TRUE	TRUE
560	319179571	Avicennia	germinans	Avicennia germinans	-89.82	21.24	NORTH_AMERICA	MX		Carretera MÃ©rida-ChuburnÃ¡ Puerto, 2 km antes de llegar a ChuburnÃ¡	TRUE	TRUE	TRUE	TRUE	TRUE	TRUE	TRUE	TRUE	TRUE	TRUE
561	145210228	Avicennia	germinans	Avicennia germinans	-89.729	21.272		MX	PROGRESO	1.5 km al S de Chelem, camino a Progreso	TRUE	TRUE	TRUE	TRUE	TRUE	TRUE	TRUE	TRUE	TRUE	TRUE
562	236462964	Avicennia	germinans	Avicennia germinans	-89.729	21.272		MX	PROGRESO	1.5 km al S de Chelem, camino a Progreso	TRUE	TRUE	TRUE	TRUE	TRUE	TRUE	TRUE	TRUE	TRUE	TRUE
563	218946998	Avicennia	germinans	Avicennia germinans	-89.7167	21.2708		MX	Progreso	1.5 km al S de Chelem, camino a Progreso.	TRUE	TRUE	TRUE	TRUE	TRUE	TRUE	TRUE	TRUE	TRUE	TRUE
564	236462973	Avicennia	germinans	Avicennia germinans	-89.699	21.276		MX	PROGRESO	Orilla de la carr. Chelem-Progreso	TRUE	TRUE	TRUE	TRUE	TRUE	TRUE	TRUE	TRUE	TRUE	TRUE
565	145210237	Avicennia	germinans	Avicennia germinans	-89.699	21.276		MX	PROGRESO	Orilla de la carr. Chelem-Progreso	TRUE	TRUE	TRUE	TRUE	TRUE	TRUE	TRUE	TRUE	TRUE	TRUE
566	319179723	Avicennia	germinans	Avicennia germinans	-89.69	21.26	NORTH_AMERICA	MX	Progreso	Orilla de carretera Chelem-Progresso., Alt Nivel Del Mar.	TRUE	TRUE	TRUE	TRUE	TRUE	TRUE	TRUE	TRUE	TRUE	TRUE
570	319179707	Avicennia	germinans	Avicennia germinans	-89.67	21.28	NORTH_AMERICA	MX	Progreso	Progreso.	TRUE	TRUE	TRUE	TRUE	TRUE	TRUE	TRUE	TRUE	TRUE	TRUE
571	371104084	Avicennia	germinans	Avicennia germinans	-89.667	21.283		MX	Progreso	Progreso	TRUE	TRUE	TRUE	TRUE	TRUE	TRUE	TRUE	TRUE	TRUE	TRUE
573	235687956	Avicennia	germinans	Avicennia germinans	-89.633	21.25		MX	PROGRESO	1.5 km al S de Chelem, camino a Progreso	TRUE	TRUE	TRUE	TRUE	TRUE	TRUE	TRUE	TRUE	TRUE	TRUE
575	218947086	Avicennia	germinans	Avicennia germinans	-89.5667	21.2844		MX	Progreso	Progreso.	TRUE	TRUE	TRUE	TRUE	TRUE	TRUE	TRUE	TRUE	TRUE	TRUE
576	218947019	Avicennia	germinans	Avicennia germinans	-89.5667	21.2844		MX	Progreso	Progreso.	TRUE	TRUE	TRUE	TRUE	TRUE	TRUE	TRUE	TRUE	TRUE	TRUE
577	218946927	Avicennia	germinans	Avicennia germinans	-89.5667	21.2844		MX	Progreso	Progreso.	TRUE	TRUE	TRUE	TRUE	TRUE	TRUE	TRUE	TRUE	TRUE	TRUE
578	218947064	Avicennia	germinans	Avicennia germinans	-89.5667	21.2844		MX	Progreso	Progreso.	TRUE	TRUE	TRUE	TRUE	TRUE	TRUE	TRUE	TRUE	TRUE	TRUE
580	235688064	Avicennia	germinans	Avicennia germinans	-89.267	21.333		MX	TELCHAC PUERTO	ND	TRUE	TRUE	TRUE	TRUE	TRUE	TRUE	TRUE	TRUE	TRUE	TRUE
581	370970617	Avicennia	germinans	Avicennia germinans	-89.267	21.333		MX	TELCHAC PUERTO	Poblado del Puerto de Telchac	TRUE	TRUE	TRUE	TRUE	TRUE	TRUE	TRUE	TRUE	TRUE	TRUE
582	145210231	Avicennia	germinans	Avicennia germinans	-89.263	21.333		MX	TELCHAC PUERTO	500 m al S de Telchac Puerto, Telchac Puerto	TRUE	TRUE	TRUE	TRUE	TRUE	TRUE	TRUE	TRUE	TRUE	TRUE
583	236462967	Avicennia	germinans	Avicennia germinans	-89.263	21.333		MX	TELCHAC PUERTO	500 m al S de Telchac Puerto, Telchac Puerto	TRUE	TRUE	TRUE	TRUE	TRUE	TRUE	TRUE	TRUE	TRUE	TRUE
584	145055781	Avicennia	germinans	Avicennia germinans	-89.25	21.333		MX	TELCHAC PUERTO	Telchac, Puerto, 0.5 KM S	TRUE	TRUE	TRUE	TRUE	TRUE	TRUE	TRUE	TRUE	TRUE	TRUE
585	236255750	Avicennia	germinans	Avicennia germinans	-89.25	21.333		MX	Telchac, Puerto	Telchac, Puerto, 0.5 KM S	TRUE	TRUE	TRUE	TRUE	TRUE	TRUE	TRUE	TRUE	TRUE	TRUE
586	319179469	Avicennia	germinans	Avicennia germinans	-89.25	13.48	NORTH_AMERICA	SV		El Amatal	TRUE	TRUE	TRUE	TRUE	TRUE	TRUE	TRUE	TRUE	TRUE	TRUE
587	319179708	Avicennia	germinans	Avicennia germinans	-89.25	13.48	NORTH_AMERICA	SV		San Diego, El Amatal	TRUE	TRUE	TRUE	TRUE	TRUE	TRUE	TRUE	TRUE	TRUE	TRUE
588	319179671	Avicennia	germinans	Avicennia germinans	-89.25	13.48	NORTH_AMERICA	SV		San Diego, El Amatal	TRUE	TRUE	TRUE	TRUE	TRUE	TRUE	TRUE	TRUE	TRUE	TRUE
589	218946991	Avicennia	germinans	Avicennia germinans	-89.2333	21.3333		MX	Telchac Puerto	500 m al S de Telchac Puerto.	TRUE	TRUE	TRUE	TRUE	TRUE	TRUE	TRUE	TRUE	TRUE	TRUE
591	319179554	Avicennia	germinans	Avicennia germinans	-89.17	13.48	NORTH_AMERICA	SV		San Diego, El Amatal	TRUE	TRUE	TRUE	TRUE	TRUE	TRUE	TRUE	TRUE	TRUE	TRUE
592	319179551	Avicennia	germinans	Avicennia germinans	-89	13.35	NORTH_AMERICA	SV		El Zapote, Costa del Sol	TRUE	TRUE	TRUE	TRUE	TRUE	TRUE	TRUE	TRUE	TRUE	TRUE
593	371102551	Avicennia	germinans	Avicennia germinans	-88.983	21.383		MX	Dzilam de Bravo	Mina de Oro	TRUE	TRUE	TRUE	TRUE	TRUE	TRUE	TRUE	TRUE	TRUE	TRUE
594	145210242	Avicennia	germinans	Avicennia germinans	-88.954	21.383		MX	DZILAM DE BRAVO	Entre Santa Clara y Dzilam de Bravo	TRUE	TRUE	TRUE	TRUE	TRUE	TRUE	TRUE	TRUE	TRUE	TRUE
595	236462978	Avicennia	germinans	Avicennia germinans	-88.954	21.383		MX	DZILAM DE BRAVO	Entre Santa Clara y Dzilam de Bravo	TRUE	TRUE	TRUE	TRUE	TRUE	TRUE	TRUE	TRUE	TRUE	TRUE
596	319179638	Avicennia	germinans	Avicennia germinans	-88.95	21.38	NORTH_AMERICA	MX	Dzilam de Bravo	6 km. al W de Dzilam de Bravo, brecha a Pto. Telchac. de Dunas. Suelo arenoso.	TRUE	TRUE	TRUE	TRUE	TRUE	TRUE	TRUE	TRUE	TRUE	TRUE
597	218946977	Avicennia	germinans	Avicennia germinans	-88.95	21.3722		MX	Dzilam de Bravo	Entre Santa Clara y Dzilam de Bravo.	TRUE	TRUE	TRUE	TRUE	TRUE	TRUE	TRUE	TRUE	TRUE	TRUE
598	319179730	Avicennia	germinans	Avicennia germinans	-88.95	13.35	NORTH_AMERICA	SV		Herradura	TRUE	TRUE	TRUE	TRUE	TRUE	TRUE	TRUE	TRUE	TRUE	TRUE
599	218946959	Avicennia	germinans	Avicennia germinans	-88.9333	21.3803		MX	Dzilam de Bravo	6 km al O de Dzilam de Bravo, brecha a Puerto Telchac.	TRUE	TRUE	TRUE	TRUE	TRUE	TRUE	TRUE	TRUE	TRUE	TRUE
600	319179735	Avicennia	germinans	Avicennia germinans	-88.89	21.39	NORTH_AMERICA	MX	Dzilam de Bravo	Port of Silam.	TRUE	TRUE	TRUE	TRUE	TRUE	TRUE	TRUE	TRUE	TRUE	TRUE
601	319179664	Avicennia	germinans	Avicennia germinans	-88.89	21.39	NORTH_AMERICA	MX	Dzilam de Bravo	Port of Silam.	TRUE	TRUE	TRUE	TRUE	TRUE	TRUE	TRUE	TRUE	TRUE	TRUE
602	145210229	Avicennia	germinans	Avicennia germinans	-88.878	21.392		MX	DZILAM DE BRAVO	1.5 km al E de Dzilam de Bravo	TRUE	TRUE	TRUE	TRUE	TRUE	TRUE	TRUE	TRUE	TRUE	TRUE
603	236462965	Avicennia	germinans	Avicennia germinans	-88.878	21.392		MX	DZILAM DE BRAVO	1.5 km al E de Dzilam de Bravo	TRUE	TRUE	TRUE	TRUE	TRUE	TRUE	TRUE	TRUE	TRUE	TRUE
604	218946994	Avicennia	germinans	Avicennia germinans	-88.8667	21.3944		MX	Dzilam de Bravo	1.5 km al E de Dzilam de Bravo.	TRUE	TRUE	TRUE	TRUE	TRUE	TRUE	TRUE	TRUE	TRUE	TRUE
605	235687957	Avicennia	germinans	Avicennia germinans	-88.833	21.417		MX	DZILAM DE BRAVO	Santa Clara-Dzilam de Bravo	TRUE	TRUE	TRUE	TRUE	TRUE	TRUE	TRUE	TRUE	TRUE	TRUE
606	236255758	Avicennia	germinans	Avicennia germinans	-88.833	21.417		MX	Dzilam de Bravo	Santa Clara y Dzilam de Bravo, entre	TRUE	TRUE	TRUE	TRUE	TRUE	TRUE	TRUE	TRUE	TRUE	TRUE
607	145055769	Avicennia	germinans	Avicennia germinans	-88.833	21.417		MX	DZILAM DE BRAVO	Santa Clara y Dzilam de Bravo, entre	TRUE	TRUE	TRUE	TRUE	TRUE	TRUE	TRUE	TRUE	TRUE	TRUE
608	235688062	Avicennia	germinans	Avicennia germinans	-88.833	21.333		MX	DZILAM DE BRAVO	Santa Clara-Dzilam de Bravo	TRUE	TRUE	TRUE	TRUE	TRUE	TRUE	TRUE	TRUE	TRUE	TRUE
610	371090706	Avicennia	germinans	Avicennia germinans	-88.683	21.45		MX	Dzilam de Bravo	Bocas de Dzilam	TRUE	TRUE	TRUE	TRUE	TRUE	TRUE	TRUE	TRUE	TRUE	TRUE
613	370249944	Avicennia	germinans	Avicennia germinans	-88.319	19.237		MX		Cenote	TRUE	TRUE	TRUE	TRUE	TRUE	TRUE	TRUE	TRUE	TRUE	TRUE
614	370251290	Avicennia	germinans	Avicennia germinans	-88.311	19.24		MX		Del Km 10 al 15 al O de Peteacab rumbo a la Laguna de Paytaro	TRUE	TRUE	TRUE	TRUE	TRUE	TRUE	TRUE	TRUE	TRUE	TRUE
615	319179622	Avicennia	germinans	Avicennia germinans	-88.31	16.8	NORTH_AMERICA	BZ		All Pines	TRUE	TRUE	TRUE	TRUE	TRUE	TRUE	TRUE	TRUE	TRUE	TRUE
616	371090689	Avicennia	germinans	Avicennia germinans	-88.283	21.55		MX	San Felipe	Isla Cerritos	TRUE	TRUE	TRUE	TRUE	TRUE	TRUE	TRUE	TRUE	TRUE	TRUE
632	370251236	Avicennia	germinans	Avicennia germinans	-88.186	19.153		MX		Desviacion del poblado de Nohbec	TRUE	TRUE	TRUE	TRUE	TRUE	TRUE	TRUE	TRUE	TRUE	TRUE
633	235687947	Avicennia	germinans	Avicennia germinans	-88.167	21.583		MX	RIO LAGARTOS	Cerca del Ojo de agua, RÃ­o Lagartos	TRUE	TRUE	TRUE	TRUE	TRUE	TRUE	TRUE	TRUE	TRUE	TRUE
634	370251000	Avicennia	germinans	Avicennia germinans	-88.165	19.109		MX		Al 1 Km al S del Rancho la Lagunita	TRUE	TRUE	TRUE	TRUE	TRUE	TRUE	TRUE	TRUE	TRUE	TRUE
635	574877907	Avicennia	germinans	Avicennia germinans	-88.1611	18.3164		BZ		Sarteneja; 4 Km Southwest of Sarteneja; transition between lowland forest on limestone and mangrove lagoon.	TRUE	TRUE	TRUE	TRUE	TRUE	TRUE	TRUE	TRUE	TRUE	TRUE
636	145210232	Avicennia	germinans	Avicennia germinans	-88.158	21.598		MX	RIO LAGARTOS	Afueras de la Ciudad RÃ­o Lagartos	TRUE	TRUE	TRUE	TRUE	TRUE	TRUE	TRUE	TRUE	TRUE	TRUE
637	236462968	Avicennia	germinans	Avicennia germinans	-88.158	21.598		MX	RIO LAGARTOS	Afueras de la Ciudad RÃ­o Lagartos	TRUE	TRUE	TRUE	TRUE	TRUE	TRUE	TRUE	TRUE	TRUE	TRUE
638	371104431	Avicennia	germinans	Avicennia germinans	-88.15	21.6		MX	RÃ­o Lagartos	RÃ­o Lagartos	TRUE	TRUE	TRUE	TRUE	TRUE	TRUE	TRUE	TRUE	TRUE	TRUE
639	218946995	Avicennia	germinans	Avicennia germinans	-88.15	21.5917		MX	Rio Lagartos	Afueras de la ciudad, rÃ­o Lagartos.	TRUE	TRUE	TRUE	TRUE	TRUE	TRUE	TRUE	TRUE	TRUE	TRUE
643	371106712	Avicennia	germinans	Avicennia germinans	-88.1	21.583		MX	RÃ­o Lagartos	RÃ­o Lagartos-Las Coloradas Km 8	TRUE	TRUE	TRUE	TRUE	TRUE	TRUE	TRUE	TRUE	TRUE	TRUE
644	218947049	Avicennia	germinans	Avicennia germinans	-88.1	21.575		MX	Tizimin	55 km de TizimÃ­n, rumbo a Las Coloradas y a 50 m del puente rÃ­o Lagartos.	TRUE	TRUE	TRUE	TRUE	TRUE	TRUE	TRUE	TRUE	TRUE	TRUE
645	235687948	Avicennia	germinans	Avicennia germinans	-88.1	19.417		MX		6 km al E de El Ramonal	TRUE	TRUE	TRUE	TRUE	TRUE	TRUE	TRUE	TRUE	TRUE	TRUE
647	370253545	Avicennia	germinans	Avicennia germinans	-88.073	19.736		MX		A 2 Km antes de la Laguna de San Andres	TRUE	TRUE	TRUE	TRUE	TRUE	TRUE	TRUE	TRUE	TRUE	TRUE
648	370253530	Avicennia	germinans	Avicennia germinans	-88.073	19.736		MX		A 2 Km antes de la Laguna de San Andres	TRUE	TRUE	TRUE	TRUE	TRUE	TRUE	TRUE	TRUE	TRUE	TRUE
650	145210243	Avicennia	germinans	Avicennia germinans	-88.058	21.51		MX	RIO LAGARTOS	55 km del minicipio de TizimÃ­n en el camino rumbo a las Coloradas y a 50 m del puente del RÃ­o Lagartos	TRUE	TRUE	TRUE	TRUE	TRUE	TRUE	TRUE	TRUE	TRUE	TRUE
651	236462979	Avicennia	germinans	Avicennia germinans	-88.058	21.51		MX	RIO LAGARTOS	55 km del minicipio de TizimÃ­n en el camino rumbo a las Coloradas y a 50 m del puente del RÃ­o Lagartos	TRUE	TRUE	TRUE	TRUE	TRUE	TRUE	TRUE	TRUE	TRUE	TRUE
653	370252492	Avicennia	germinans	Avicennia germinans	-88.034	19.497		MX		Desviacion hacia la Laguna de Mocho Kush	TRUE	TRUE	TRUE	TRUE	TRUE	TRUE	TRUE	TRUE	TRUE	TRUE
654	370252053	Avicennia	germinans	Avicennia germinans	-88.034	19.497		MX		Desviacion hacia la Laguna de Mocho Kush	TRUE	TRUE	TRUE	TRUE	TRUE	TRUE	TRUE	TRUE	TRUE	TRUE
657	370252906	Avicennia	germinans	Avicennia germinans	-87.998	19.641		MX		A 6.8 Km al N del poblado de Felipe Carrillo Puerto sobre la carretera hacia Tulum	TRUE	TRUE	TRUE	TRUE	TRUE	TRUE	TRUE	TRUE	TRUE	TRUE
660	218947202	Avicennia	germinans	Avicennia germinans	-87.9167	18.4394		MX		Camino Blanco de X-Calak, rumbo a Majahual.	TRUE	TRUE	TRUE	TRUE	TRUE	TRUE	TRUE	TRUE	TRUE	TRUE
661	319179472	Avicennia	germinans	Avicennia germinans	-87.9	21	NORTH_AMERICA	MX		500 al sur de Chiquila, Lazaro Cardenas. Manglar, primaria, suelo negro-arenoso-inundado, asoc. con manglar puro	TRUE	TRUE	TRUE	TRUE	TRUE	TRUE	TRUE	TRUE	TRUE	TRUE
662	235688063	Avicennia	germinans	Avicennia germinans	-87.85	18.3		MX		2 km de Xcalak, carretera para Majahual, entrada por Limones	TRUE	TRUE	TRUE	TRUE	TRUE	TRUE	TRUE	TRUE	TRUE	TRUE
663	319179428	Avicennia	germinans	Avicennia germinans	-87.79	13.44	NORTH_AMERICA	SV		Ca. 1 Km south of Barrancones. Low scrub forest on old lava flow with loose rocks at edge of mangrove swamp	TRUE	TRUE	TRUE	TRUE	TRUE	TRUE	TRUE	TRUE	TRUE	TRUE
667	145210234	Avicennia	germinans	Avicennia germinans	-87.693	21.49		MX	TIZIMIN	3 km al S de El Cuyo, TizimÃ­n	TRUE	TRUE	TRUE	TRUE	TRUE	TRUE	TRUE	TRUE	TRUE	TRUE
668	236462970	Avicennia	germinans	Avicennia germinans	-87.693	21.49		MX	TIZIMIN	3 km al S de El Cuyo, TizimÃ­n	TRUE	TRUE	TRUE	TRUE	TRUE	TRUE	TRUE	TRUE	TRUE	TRUE
669	371104959	Avicennia	germinans	Avicennia germinans	-87.683	21.5		MX	TizimÃ­n	El Cuyo-Colonia YucatÃ¡n Km 3	TRUE	TRUE	TRUE	TRUE	TRUE	TRUE	TRUE	TRUE	TRUE	TRUE
670	319179641	Avicennia	germinans	Avicennia germinans	-87.67	19.83	NORTH_AMERICA	MX		Sian Ka'an Biosphere Reserve. 15-20km N of Carrillo Puerto	TRUE	TRUE	TRUE	TRUE	TRUE	TRUE	TRUE	TRUE	TRUE	TRUE
671	235688078	Avicennia	germinans	Avicennia germinans	-87.667	20		MX		ND	TRUE	TRUE	TRUE	TRUE	TRUE	TRUE	TRUE	TRUE	TRUE	TRUE
672	931002757	Avicennia	germinans	Avicennia germinans	-87.6667	19.8333		MX		km 15 - 20 N de Puerto Carrillo	TRUE	TRUE	TRUE	TRUE	TRUE	TRUE	TRUE	TRUE	TRUE	TRUE
673	319179659	Avicennia	germinans	Avicennia germinans	-87.65	20.05	NORTH_AMERICA	MX		27.5 km al sur de las Ruinas de Tulum	TRUE	TRUE	TRUE	TRUE	TRUE	TRUE	TRUE	TRUE	TRUE	TRUE
674	218947028	Avicennia	germinans	Avicennia germinans	-87.6333	21.4917		MX	Tizimin	3 km al S de El Cuyo.	TRUE	TRUE	TRUE	TRUE	TRUE	TRUE	TRUE	TRUE	TRUE	TRUE
675	235688123	Avicennia	germinans	Avicennia germinans	-87.633	21.5		MX	TIZIMIN	ND	TRUE	TRUE	TRUE	TRUE	TRUE	TRUE	TRUE	TRUE	TRUE	TRUE
677	218947079	Avicennia	germinans	Avicennia germinans	-87.6	19.7864		MX		6 km al E del Ramonal.	TRUE	TRUE	TRUE	TRUE	TRUE	TRUE	TRUE	TRUE	TRUE	TRUE
678	218947361	Avicennia	germinans	Avicennia germinans	-87.6	19.7861		MX		Reserva de la BiÃ³sfera Sian KaÂ´an, 6 km al E del Ramonal.	TRUE	TRUE	TRUE	TRUE	TRUE	TRUE	TRUE	TRUE	TRUE	TRUE
679	235688116	Avicennia	germinans	Avicennia germinans	-87.6	19.783		MX		VigÃ­a Chico	TRUE	TRUE	TRUE	TRUE	TRUE	TRUE	TRUE	TRUE	TRUE	TRUE
680	235688127	Avicennia	germinans	Avicennia germinans	-87.6	19.783		MX		VigÃ­a Chico	TRUE	TRUE	TRUE	TRUE	TRUE	TRUE	TRUE	TRUE	TRUE	TRUE
681	235687938	Avicennia	germinans	Avicennia germinans	-87.6	19.783		MX		VigÃ­a Chico	TRUE	TRUE	TRUE	TRUE	TRUE	TRUE	TRUE	TRUE	TRUE	TRUE
688	218947066	Avicennia	germinans	Avicennia germinans	-87.55	19.8225		MX		VigÃ­a Chico.	TRUE	TRUE	TRUE	TRUE	TRUE	TRUE	TRUE	TRUE	TRUE	TRUE
689	218947095	Avicennia	germinans	Avicennia germinans	-87.55	19.8222		MX		VigÃ­a Chico.	TRUE	TRUE	TRUE	TRUE	TRUE	TRUE	TRUE	TRUE	TRUE	TRUE
690	218946978	Avicennia	germinans	Avicennia germinans	-87.55	19.8222		MX		VigÃ­a Chico.	TRUE	TRUE	TRUE	TRUE	TRUE	TRUE	TRUE	TRUE	TRUE	TRUE
697	235687949	Avicennia	germinans	Avicennia germinans	-87.5	20		MX		LÃ¡zaro CÃ¡rdenas, playas de las cabaÃ±as del CapitÃ¡n Lafitte	TRUE	TRUE	TRUE	TRUE	TRUE	TRUE	TRUE	TRUE	TRUE	TRUE
703	218947290	Avicennia	germinans	Avicennia germinans	-87.4833	19.8992		MX		Km 39 camino TulÃºm - Punta Allen.	TRUE	TRUE	TRUE	TRUE	TRUE	TRUE	TRUE	TRUE	TRUE	TRUE
705	319179634	Avicennia	germinans	Avicennia germinans	-87.45	13.42	NORTH_AMERICA	HN		Alrededores de San Lorenzo. Bosque seco tropical.	TRUE	TRUE	TRUE	TRUE	TRUE	TRUE	TRUE	TRUE	TRUE	TRUE
706	319179693	Avicennia	germinans	Avicennia germinans	-87.45	13.42	NORTH_AMERICA	HN		San Lorenzo. Bosque seco tropical	TRUE	TRUE	TRUE	TRUE	TRUE	TRUE	TRUE	TRUE	TRUE	TRUE
707	319179654	Avicennia	germinans	Avicennia germinans	-87.45	13.42	NORTH_AMERICA	HN		San Lorenzo. Bosque seco tropical; a nivel del mar.	TRUE	TRUE	TRUE	TRUE	TRUE	TRUE	TRUE	TRUE	TRUE	TRUE
708	319179710	Avicennia	germinans	Avicennia germinans	-87.44	13.19	NORTH_AMERICA	HN		Along CedeÃ±os beach.	TRUE	TRUE	TRUE	TRUE	TRUE	TRUE	TRUE	TRUE	TRUE	TRUE
709	319179721	Avicennia	germinans	Avicennia germinans	-87.43	15.8	NORTH_AMERICA	HN			TRUE	TRUE	TRUE	TRUE	TRUE	TRUE	TRUE	TRUE	TRUE	TRUE
714	235687952	Avicennia	germinans	Avicennia germinans	-87.383	21.383		MX	LAZARO CARDENAS	ChiquilÃ¡	TRUE	TRUE	TRUE	TRUE	TRUE	TRUE	TRUE	TRUE	TRUE	TRUE
718	236462969	Avicennia	germinans	Avicennia germinans	-87.342	21.424		MX	LAZARO CARDENAS	500 m al S de Chiquila, LÃ¡zaro CÃ¡rdenas	TRUE	TRUE	TRUE	TRUE	TRUE	TRUE	TRUE	TRUE	TRUE	TRUE
719	145210233	Avicennia	germinans	Avicennia germinans	-87.342	21.424		MX	LAZARO CARDENAS	500 m al S de Chiquila, LÃ¡zaro CÃ¡rdenas	TRUE	TRUE	TRUE	TRUE	TRUE	TRUE	TRUE	TRUE	TRUE	TRUE
720	218946944	Avicennia	germinans	Avicennia germinans	-87.3333	21.4278		MX	Lazaro Cardenas	Laguna frente al poblado de Chiquila, al NO de CancÃºn.	TRUE	TRUE	TRUE	TRUE	TRUE	TRUE	TRUE	TRUE	TRUE	TRUE
721	218947027	Avicennia	germinans	Avicennia germinans	-87.3333	21.4169		MX	Lazaro Cardenas	500 m al S de Chiquila.	TRUE	TRUE	TRUE	TRUE	TRUE	TRUE	TRUE	TRUE	TRUE	TRUE
723	371102792	Avicennia	germinans	Avicennia germinans	-87.333	21.417		MX	LÃ¡zaro CÃ¡rdenas	ChiquilÃ¡	TRUE	TRUE	TRUE	TRUE	TRUE	TRUE	TRUE	TRUE	TRUE	TRUE
724	371101593	Avicennia	germinans	Avicennia germinans	-87.333	21.417		MX	LÃ¡zaro CÃ¡rdenas	ChiquilÃ¡	TRUE	TRUE	TRUE	TRUE	TRUE	TRUE	TRUE	TRUE	TRUE	TRUE
730	319179315	Avicennia	germinans	Avicennia germinans	-87.17	12.85	NORTH_AMERICA	NI		Alrededores de Puerto MorazÃ¡n; Manglares	TRUE	TRUE	TRUE	TRUE	TRUE	TRUE	TRUE	TRUE	TRUE	TRUE
731	319179313	Avicennia	germinans	Avicennia germinans	-87.17	12.52	NORTH_AMERICA	NI		Manglares entre Corinto y puente Paso Caballos	TRUE	TRUE	TRUE	TRUE	TRUE	TRUE	TRUE	TRUE	TRUE	TRUE
732	235687943	Avicennia	germinans	Avicennia germinans	-87.167	21.567		MX	ISLA MUJERES	Isla Holbox, zona NE	TRUE	TRUE	TRUE	TRUE	TRUE	TRUE	TRUE	TRUE	TRUE	TRUE
733	235687937	Avicennia	germinans	Avicennia germinans	-87.167	21.567		MX	LAZARO CARDENAS	LÃ¡zaro CÃ¡rdenas, Isla Holbox	TRUE	TRUE	TRUE	TRUE	TRUE	TRUE	TRUE	TRUE	TRUE	TRUE
734	235687939	Avicennia	germinans	Avicennia germinans	-87.167	21.567		MX	LAZARO CARDENAS	Isla Holbox	TRUE	TRUE	TRUE	TRUE	TRUE	TRUE	TRUE	TRUE	TRUE	TRUE
735	235687942	Avicennia	germinans	Avicennia germinans	-87.167	21.567		MX	ISLA MUJERES	Isla Holbox, zona NE	TRUE	TRUE	TRUE	TRUE	TRUE	TRUE	TRUE	TRUE	TRUE	TRUE
736	235687941	Avicennia	germinans	Avicennia germinans	-87.167	21.567		MX	ISLA MUJERES	Isla Holbox, km 4 al W de Cabo Catoche	TRUE	TRUE	TRUE	TRUE	TRUE	TRUE	TRUE	TRUE	TRUE	TRUE
737	319179560	Avicennia	germinans	Avicennia germinans	-87.15	12.82	NORTH_AMERICA	NI		Municipio de Puerto MorazÃ¡n. del poblado de MorazÃ¡n hasta 5 Km en direcciÃ³n de TonalÃ¡.	TRUE	TRUE	TRUE	TRUE	TRUE	TRUE	TRUE	TRUE	TRUE	TRUE
738	371101146	Avicennia	germinans	Avicennia germinans	-87.133	21.533		MX	LÃ¡zaro CÃ¡rdenas	Holbox, 4 Km al O de Cabo Catoche	TRUE	TRUE	TRUE	TRUE	TRUE	TRUE	TRUE	TRUE	TRUE	TRUE
739	371101183	Avicennia	germinans	Avicennia germinans	-87.117	21.6		MX	LÃ¡zaro CÃ¡rdenas	Isla Holbox, Cabo Catoche	TRUE	TRUE	TRUE	TRUE	TRUE	TRUE	TRUE	TRUE	TRUE	TRUE
742	319179329	Avicennia	germinans	Avicennia germinans	-87.03	12.37	NORTH_AMERICA	NI		Utla-Xilampa, Poneloya; sucesiÃ³n en terreno arenoso, medio salino, manglares	TRUE	TRUE	TRUE	TRUE	TRUE	TRUE	TRUE	TRUE	TRUE	TRUE
745	235688081	Avicennia	germinans	Avicennia germinans	-87	20.367		MX	COZUMEL	ND	TRUE	TRUE	TRUE	TRUE	TRUE	TRUE	TRUE	TRUE	TRUE	TRUE
752	235687936	Avicennia	germinans	Avicennia germinans	-86.967	20.5		MX	COZUMEL	Isla Cozumel, zona W	TRUE	TRUE	TRUE	TRUE	TRUE	TRUE	TRUE	TRUE	TRUE	TRUE
753	235687935	Avicennia	germinans	Avicennia germinans	-86.967	20.5		MX	COZUMEL	Isla Cozumel, zona N	TRUE	TRUE	TRUE	TRUE	TRUE	TRUE	TRUE	TRUE	TRUE	TRUE
756	218947182	Avicennia	germinans	Avicennia germinans	-86.9333	21.2517		MX	Isla Mujeres	Camino al Puerto de Abrigo, Isla Mujeres.	TRUE	TRUE	TRUE	TRUE	TRUE	TRUE	TRUE	TRUE	TRUE	TRUE
757	218947125	Avicennia	germinans	Avicennia germinans	-86.9333	21.2514		MX	Isla Mujeres	3 km al S de la zona urbana de Isla Mujeres.	TRUE	TRUE	TRUE	TRUE	TRUE	TRUE	TRUE	TRUE	TRUE	TRUE
758	371100250	Avicennia	germinans	Avicennia germinans	-86.933	20.517		MX	Cozumel	Cozumel, extremo N	TRUE	TRUE	TRUE	TRUE	TRUE	TRUE	TRUE	TRUE	TRUE	TRUE
759	371100218	Avicennia	germinans	Avicennia germinans	-86.933	20.517		MX	Cozumel	Cozumel, extremo N	TRUE	TRUE	TRUE	TRUE	TRUE	TRUE	TRUE	TRUE	TRUE	TRUE
760	145210241	Avicennia	germinans	Avicennia germinans	-86.927	20.548		MX	COZUMEL	4 km al N de la zona hotelera de San Miguel de Cozumel, sobre el camino a la Isla de la PasiÃ³n. Isla de Cozumel	TRUE	TRUE	TRUE	TRUE	TRUE	TRUE	TRUE	TRUE	TRUE	TRUE
761	236462977	Avicennia	germinans	Avicennia germinans	-86.927	20.548		MX	COZUMEL	4 km al N de la zona hotelera de San Miguel de Cozumel, sobre el camino a la Isla de la PasiÃ³n. Isla de Cozumel	TRUE	TRUE	TRUE	TRUE	TRUE	TRUE	TRUE	TRUE	TRUE	TRUE
762	145210252	Avicennia	germinans	Avicennia germinans	-86.922	20.817		MX	BENITO JUAREZ	En Cocotal, a 5 km al S de Puerto Morelos, sobre brecha a Punta Brava	TRUE	TRUE	TRUE	TRUE	TRUE	TRUE	TRUE	TRUE	TRUE	TRUE
763	236462988	Avicennia	germinans	Avicennia germinans	-86.922	20.817		MX	BENITO JUAREZ	En Cocotal, a 5 km al S de Puerto Morelos, sobre brecha a Punta Brava	TRUE	TRUE	TRUE	TRUE	TRUE	TRUE	TRUE	TRUE	TRUE	TRUE
766	218947116	Avicennia	germinans	Avicennia germinans	-86.9167	20.815		MX	Benito Juarez	Brecha a Playa Punta Brava, al S de Puerto Morelos.	TRUE	TRUE	TRUE	TRUE	TRUE	TRUE	TRUE	TRUE	TRUE	TRUE
767	218947124	Avicennia	germinans	Avicennia germinans	-86.9167	20.55		MX	Cozumel	4 km al N de la zona hotelera de la Isla Cozumel, camino a la Isla de la PasiÃ³n.	TRUE	TRUE	TRUE	TRUE	TRUE	TRUE	TRUE	TRUE	TRUE	TRUE
768	319179550	Avicennia	germinans	Avicennia germinans	-86.9	20.55	NORTH_AMERICA	MX	Cozumel	Isla Cozumel, parte Norte de la Isla. Selva mediana subperennifolia, primaria, suelo blanco pedregoso asociada con Conocarpus	TRUE	TRUE	TRUE	TRUE	TRUE	TRUE	TRUE	TRUE	TRUE	TRUE
769	319179578	Avicennia	germinans	Avicennia germinans	-86.87	20.94	NORTH_AMERICA	MX		A 10 km al norte de Puerto Morelos, sobre el camino a Punta Caracol, ecotono entre duna costrera y manglar	TRUE	TRUE	TRUE	TRUE	TRUE	TRUE	TRUE	TRUE	TRUE	TRUE
770	236462956	Avicennia	germinans	Avicennia germinans	-86.869	20.942		MX	BENITO JUAREZ	10 km al N de Puerto Morelos, sobre el camino a Punta Caracol	TRUE	TRUE	TRUE	TRUE	TRUE	TRUE	TRUE	TRUE	TRUE	TRUE
771	145210220	Avicennia	germinans	Avicennia germinans	-86.869	20.942		MX	BENITO JUAREZ	10 km al N de Puerto Morelos, sobre el camino a Punta Caracol	TRUE	TRUE	TRUE	TRUE	TRUE	TRUE	TRUE	TRUE	TRUE	TRUE
772	145055776	Avicennia	germinans	Avicennia germinans	-86.867	20.917		MX	BENITO JUAREZ	Puerto Morelos, 10 KM N, camino a Punta Caracol	TRUE	TRUE	TRUE	TRUE	TRUE	TRUE	TRUE	TRUE	TRUE	TRUE
773	236255843	Avicennia	germinans	Avicennia germinans	-86.867	20.917		MX	BenÃ­to JuÃ¡rez	Puerto Morelos, 10 KM N, camino a Punta Caracol	TRUE	TRUE	TRUE	TRUE	TRUE	TRUE	TRUE	TRUE	TRUE	TRUE
774	235688115	Avicennia	germinans	Avicennia germinans	-86.867	20.5		MX	COZUMEL	Isla Cozumel, zona N	TRUE	TRUE	TRUE	TRUE	TRUE	TRUE	TRUE	TRUE	TRUE	TRUE
775	235688017	Avicennia	germinans	Avicennia germinans	-86.867	20.5		MX	COZUMEL	Isla Cozumel, zona N	TRUE	TRUE	TRUE	TRUE	TRUE	TRUE	TRUE	TRUE	TRUE	TRUE
776	235688096	Avicennia	germinans	Avicennia germinans	-86.867	20.5		MX	COZUMEL	Isla Cozumel, zona N	TRUE	TRUE	TRUE	TRUE	TRUE	TRUE	TRUE	TRUE	TRUE	TRUE
777	218947057	Avicennia	germinans	Avicennia germinans	-86.8667	20.9417		MX	Benito Juarez	10 km al N de Puerto Morelos, sobre el camino a Punta Caracol.	TRUE	TRUE	TRUE	TRUE	TRUE	TRUE	TRUE	TRUE	TRUE	TRUE
779	236462961	Avicennia	germinans	Avicennia germinans	-86.85	21.089		MX	BENITO JUAREZ	Camino a Punta Nizuc, desde el entronque de la carr., CancÃºn-Chetumal, Benito JuÃ¡rez	TRUE	TRUE	TRUE	TRUE	TRUE	TRUE	TRUE	TRUE	TRUE	TRUE
780	145210225	Avicennia	germinans	Avicennia germinans	-86.85	21.089		MX	BENITO JUAREZ	Camino a Punta Nizuc, desde el entronque de la carr., CancÃºn-Chetumal, Benito JuÃ¡rez	TRUE	TRUE	TRUE	TRUE	TRUE	TRUE	TRUE	TRUE	TRUE	TRUE
781	236462958	Avicennia	germinans	Avicennia germinans	-86.849	21.035		MX	BENITO JUAREZ	Camino a Punta Nizuc, 15 km S de CancÃºn	TRUE	TRUE	TRUE	TRUE	TRUE	TRUE	TRUE	TRUE	TRUE	TRUE
782	145210222	Avicennia	germinans	Avicennia germinans	-86.849	21.035		MX	BENITO JUAREZ	Camino a Punta Nizuc, 15 km S de CancÃºn	TRUE	TRUE	TRUE	TRUE	TRUE	TRUE	TRUE	TRUE	TRUE	TRUE
783	218946979	Avicennia	germinans	Avicennia germinans	-86.8333	21.0361		MX	Benito Juarez	Camino a Punta Nizuc, desde el entronque de la carretera CancÃºn - Chetumal.	TRUE	TRUE	TRUE	TRUE	TRUE	TRUE	TRUE	TRUE	TRUE	TRUE
784	218946884	Avicennia	germinans	Avicennia germinans	-86.8333	21.0361		MX	Benito Juarez	Camino a Nizuc, entronque de la carretera CancÃºn-TulÃºm.	TRUE	TRUE	TRUE	TRUE	TRUE	TRUE	TRUE	TRUE	TRUE	TRUE
785	371099913	Avicennia	germinans	Avicennia germinans	-86.833	21.033		MX	Benito JuÃ¡rez	Camino a Punta Nizuc, desde el entronque de la carretera CancÃºn-Tulum	TRUE	TRUE	TRUE	TRUE	TRUE	TRUE	TRUE	TRUE	TRUE	TRUE
786	235688125	Avicennia	germinans	Avicennia germinans	-86.833	21		MX	BENITO JUAREZ	ND	TRUE	TRUE	TRUE	TRUE	TRUE	TRUE	TRUE	TRUE	TRUE	TRUE
787	319179355	Avicennia	germinans	Avicennia germinans	-86.83	12.26	NORTH_AMERICA	NI		Salinas Grande, en Ã¡rea inundada por agua salada con las mareas, ca 20 km al S de LeÃ³n	TRUE	TRUE	TRUE	TRUE	TRUE	TRUE	TRUE	TRUE	TRUE	TRUE
788	319179473	Avicennia	germinans	Avicennia germinans	-86.82	21.03	NORTH_AMERICA	MX		Camino a Punta Nizuc, desde el entronque de la carretera, Cancun-Chetumal, Benito Juarez. Manglar, primaria, suelo arenoso humedo, asoc. con Rhizophora mangle y Laguncularia racemosa	TRUE	TRUE	TRUE	TRUE	TRUE	TRUE	TRUE	TRUE	TRUE	TRUE
797	371090725	Avicennia	germinans	Avicennia germinans	-86.817	21.15		MX	Benito JuÃ¡rez	CancÃºn, al noreste	TRUE	TRUE	TRUE	TRUE	TRUE	TRUE	TRUE	TRUE	TRUE	TRUE
808	319179480	Avicennia	germinans	Avicennia germinans	-86.75	12.17	NORTH_AMERICA	NI		Estero Brasil, ca. 2.0 km S of Hwy. 32 on road to Velero; mangrove and adjacent low deciduous forest.	TRUE	TRUE	TRUE	TRUE	TRUE	TRUE	TRUE	TRUE	TRUE	TRUE
811	218947286	Avicennia	germinans	Avicennia germinans	-86.7333	21.2322		MX	Isla Mujeres	Isla Mujeres.	TRUE	TRUE	TRUE	TRUE	TRUE	TRUE	TRUE	TRUE	TRUE	TRUE
812	235688084	Avicennia	germinans	Avicennia germinans	-86.733	21.25		MX	ISLA MUJERES	Isla Mujeres	TRUE	TRUE	TRUE	TRUE	TRUE	TRUE	TRUE	TRUE	TRUE	TRUE
813	235688085	Avicennia	germinans	Avicennia germinans	-86.733	21.25		MX	ISLA MUJERES	Isla Mujeres	TRUE	TRUE	TRUE	TRUE	TRUE	TRUE	TRUE	TRUE	TRUE	TRUE
814	235688033	Avicennia	germinans	Avicennia germinans	-86.733	21.25		MX	ISLA MUJERES	ND	TRUE	TRUE	TRUE	TRUE	TRUE	TRUE	TRUE	TRUE	TRUE	TRUE
815	235687940	Avicennia	germinans	Avicennia germinans	-86.733	21.233		MX	ISLA MUJERES	Isla Mujeres, zona SE	TRUE	TRUE	TRUE	TRUE	TRUE	TRUE	TRUE	TRUE	TRUE	TRUE
816	145210235	Avicennia	germinans	Avicennia germinans	-86.733	21.231		MX	ISLA MUJERES	3 km al S de la zona urbana, sobre el camino a la Hacienda Mundaca, Isla Mujeres	TRUE	TRUE	TRUE	TRUE	TRUE	TRUE	TRUE	TRUE	TRUE	TRUE
817	236462971	Avicennia	germinans	Avicennia germinans	-86.733	21.231		MX	ISLA MUJERES	3 km al S de la zona urbana, sobre el camino a la Hacienda Mundaca, Isla Mujeres	TRUE	TRUE	TRUE	TRUE	TRUE	TRUE	TRUE	TRUE	TRUE	TRUE
818	319179726	Avicennia	germinans	Avicennia germinans	-86.73	21.23	NORTH_AMERICA	MX	Isla Mujeres	3 km al sur de la zona urbana de Isla Mujeres, vegetacion secundaria	TRUE	TRUE	TRUE	TRUE	TRUE	TRUE	TRUE	TRUE	TRUE	TRUE
820	319179568	Avicennia	germinans	Avicennia germinans	-86.73	12.15	NORTH_AMERICA	NI		7 km S of Puerto Somoza; mangrove swamp	TRUE	TRUE	TRUE	TRUE	TRUE	TRUE	TRUE	TRUE	TRUE	TRUE
821	218947261	Avicennia	germinans	Avicennia germinans	-86.7167	21.2233		MX	Isla Mujeres	Isla Mujeres, atrÃ¡s del Puerto de Abrigo, zona del Zak Bajo.	TRUE	TRUE	TRUE	TRUE	TRUE	TRUE	TRUE	TRUE	TRUE	TRUE
822	218947138	Avicennia	germinans	Avicennia germinans	-86.7167	21.2222		MX	Isla Mujeres	1 km al N de Playa Lancheros, sobre el camino al Restaurante Hacienda Gomar.	TRUE	TRUE	TRUE	TRUE	TRUE	TRUE	TRUE	TRUE	TRUE	TRUE
831	319179405	Avicennia	germinans	Avicennia germinans	-86.34	11.64	NORTH_AMERICA	NI		Ca. 3.3 km SE of Casares on road to Huehuete, SE of La Bocana Grande (estuary of RÃ­o Grande); beach, mangrove, valley, and low dry hillside (sedimentary rocks) communities	TRUE	TRUE	TRUE	TRUE	TRUE	TRUE	TRUE	TRUE	TRUE	TRUE
832	319179563	Avicennia	germinans	Avicennia germinans	-86.17	11.52	NORTH_AMERICA	NI		Near mouth of RÃ­o Escalante; near beach, along estuary and on slope above river, dry forest	TRUE	TRUE	TRUE	TRUE	TRUE	TRUE	TRUE	TRUE	TRUE	TRUE
833	319179922	Avicennia	germinans	Avicennia germinans	-86.08	11.43	NORTH_AMERICA	NI		Playa de Popoyo; Manglares y asociaciÃ³n halÃ³fita	TRUE	TRUE	TRUE	TRUE	TRUE	TRUE	TRUE	TRUE	TRUE	TRUE
834	319179627	Avicennia	germinans	Avicennia germinans	-85.91	15.96	NORTH_AMERICA	HN		Capuchin site east, mangrove forest. 1.8 mi strip on the north bank of rÃ­o Guaimoreto between old bridge and opening of Laguna Guaimoreto 4.5 mi NE of Trujillo on old road to Castilla	TRUE	TRUE	TRUE	TRUE	TRUE	TRUE	TRUE	TRUE	TRUE	TRUE
835	319179381	Avicennia	germinans	Avicennia germinans	-85.9	11.28	NORTH_AMERICA	NI		San Juan del Sur, camino entre Las Playas de Marsella y Rivas.	TRUE	TRUE	TRUE	TRUE	TRUE	TRUE	TRUE	TRUE	TRUE	TRUE
836	319179322	Avicennia	germinans	Avicennia germinans	-85.88	11.27	NORTH_AMERICA	NI		Estero de San Juan del Sur	TRUE	TRUE	TRUE	TRUE	TRUE	TRUE	TRUE	TRUE	TRUE	TRUE
837	319179539	Avicennia	germinans	Avicennia germinans	-85.87	11.25	NORTH_AMERICA	NI		San Juan del Sur, route 16; sandy seashore near mouth of estuary [Seymour series]	TRUE	TRUE	TRUE	TRUE	TRUE	TRUE	TRUE	TRUE	TRUE	TRUE
841	379588595	Avicennia	germinans	Avicennia germinans	-85.8444	10.3		CR		Playa Tamarindo, Tamarindo Tropical dry forest.	TRUE	TRUE	TRUE	TRUE	TRUE	TRUE	TRUE	TRUE	TRUE	TRUE
843	379589108	Avicennia	germinans	Avicennia germinans	-85.7444	11.023		CR		Playa Piedritas	TRUE	TRUE	TRUE	TRUE	TRUE	TRUE	TRUE	TRUE	TRUE	TRUE
844	379589106	Avicennia	germinans	Avicennia germinans	-85.7385	11.0339		CR		Punta Descartes, Playa El Jobo.	TRUE	TRUE	TRUE	TRUE	TRUE	TRUE	TRUE	TRUE	TRUE	TRUE
845	379589107	Avicennia	germinans	Avicennia germinans	-85.7385	11.0339		CR		Punta Descartes, Playa El Jobo.	TRUE	TRUE	TRUE	TRUE	TRUE	TRUE	TRUE	TRUE	TRUE	TRUE
846	379588280	Avicennia	germinans	Avicennia germinans	-85.7375	10.9222		CR		Murcielago; cerca de la estacion Murcielago.	TRUE	TRUE	TRUE	TRUE	TRUE	TRUE	TRUE	TRUE	TRUE	TRUE
847	379588606	Avicennia	germinans	Avicennia germinans	-85.7306	10.9028		CR		Estacion Murcielago, camino hacia Bahia Coquito	TRUE	TRUE	TRUE	TRUE	TRUE	TRUE	TRUE	TRUE	TRUE	TRUE
848	44303074	Avicennia	germinans	Avicennia germinans	-85.73	10.92		CR		P.N. Santa Rosa Cerca de la estaciÃ³n MurciÃ©lago.	TRUE	TRUE	TRUE	TRUE	TRUE	TRUE	TRUE	TRUE	TRUE	TRUE
849	44303141	Avicennia	germinans	Avicennia germinans	-85.73	10.9		CR		P.N. Santa Rosa PenÃ­nsula de Santa Elena, camino a BahÃ­a Coquito	TRUE	TRUE	TRUE	TRUE	TRUE	TRUE	TRUE	TRUE	TRUE	TRUE
850	379589118	Avicennia	germinans	Avicennia germinans	-85.7293	10.934		CR		Sector Murcielago. Bahia El Hachal,Orilla de playa. Cerca de manglar	TRUE	TRUE	TRUE	TRUE	TRUE	TRUE	TRUE	TRUE	TRUE	TRUE
851	379589116	Avicennia	germinans	Avicennia germinans	-85.7293	10.934		CR		Sector Murcielago. Bahia El Hachal,Orilla de playa. Cerca de manglar	TRUE	TRUE	TRUE	TRUE	TRUE	TRUE	TRUE	TRUE	TRUE	TRUE
852	379589117	Avicennia	germinans	Avicennia germinans	-85.7293	10.934		CR		Sector Murcielago. Bahia El Hachal,Orilla de playa. Cerca de manglar	TRUE	TRUE	TRUE	TRUE	TRUE	TRUE	TRUE	TRUE	TRUE	TRUE
853	379588272	Avicennia	germinans	Avicennia germinans	-85.7167	10.925		CR		Salinas German, at S side of Bahia Tomas, NE corner of peninsula.	TRUE	TRUE	TRUE	TRUE	TRUE	TRUE	TRUE	TRUE	TRUE	TRUE
854	44303166	Avicennia	germinans	Avicennia germinans	-85.71	10.92		CR		PenÃ­nsula de Santa Elena. Salinas German, at S side of BahÃ­a TomÃ¡s	TRUE	TRUE	TRUE	TRUE	TRUE	TRUE	TRUE	TRUE	TRUE	TRUE
855	379588869	Avicennia	germinans	Avicennia germinans	-85.7089	11.05		CR		R. N. F. S. Isla Bola?os, Bahia de Salinas.	TRUE	TRUE	TRUE	TRUE	TRUE	TRUE	TRUE	TRUE	TRUE	TRUE
856	319179739	Avicennia	germinans	Avicennia germinans	-85.7	11.05	NORTH_AMERICA	CR		Isla BolaÃ±os, BahÃ­a de Salinas.	TRUE	TRUE	TRUE	TRUE	TRUE	TRUE	TRUE	TRUE	TRUE	TRUE
857	44296944	Avicennia	germinans	Avicennia germinans	-85.7	10.3		CR		Playa Tamarindo, N of Pta. San Francisco	TRUE	TRUE	TRUE	TRUE	TRUE	TRUE	TRUE	TRUE	TRUE	TRUE
858	319179586	Avicennia	germinans	Avicennia germinans	-85.7	10.3	NORTH_AMERICA	CR		Playa Tamarindo N of Punta San Francisco.	TRUE	TRUE	TRUE	TRUE	TRUE	TRUE	TRUE	TRUE	TRUE	TRUE
859	379588198	Avicennia	germinans	Avicennia germinans	-85.6833	10.8111		CR		Areas de Estero Real, Costa Pacifica. Playa Naranjo.	TRUE	TRUE	TRUE	TRUE	TRUE	TRUE	TRUE	TRUE	TRUE	TRUE
860	44296938	Avicennia	germinans	Avicennia germinans	-85.68	10.8		CR		P.N. Santa Rosa Beach and near it.Playa Naranjo	TRUE	TRUE	TRUE	TRUE	TRUE	TRUE	TRUE	TRUE	TRUE	TRUE
861	319179468	Avicennia	germinans	Avicennia germinans	-85.68	10.8	NORTH_AMERICA	CR		Santa Rosa National Park. Beach and near it. Playa Naranjo.	TRUE	TRUE	TRUE	TRUE	TRUE	TRUE	TRUE	TRUE	TRUE	TRUE
862	319179624	Avicennia	germinans	Avicennia germinans	-85.68	10.57	NORTH_AMERICA	CR		Playa Hermosa. Just north of Playas del Cocos, along Pacific Ocean.	TRUE	TRUE	TRUE	TRUE	TRUE	TRUE	TRUE	TRUE	TRUE	TRUE
863	319179584	Avicennia	germinans	Avicennia germinans	-85.67	10.8	NORTH_AMERICA	CR		Santa Rosa National Park. Evergreen-Manilkara forest. 1 km left of fork in road to Playa Naranjo.	TRUE	TRUE	TRUE	TRUE	TRUE	TRUE	TRUE	TRUE	TRUE	TRUE
864	319179585	Avicennia	germinans	Avicennia germinans	-85.67	10.8	NORTH_AMERICA	CR		Santa Rosa National Park. Mangrove area and dry, forested hill above Mangrove area across salt flat near Manilkara forest.	TRUE	TRUE	TRUE	TRUE	TRUE	TRUE	TRUE	TRUE	TRUE	TRUE
865	377233210	Avicennia	germinans	Avicennia germinans	-85.6663	11.0478		CR		Puerto Soley, Salina en el manglar.	TRUE	TRUE	TRUE	TRUE	TRUE	TRUE	TRUE	TRUE	TRUE	TRUE
866	377233209	Avicennia	germinans	Avicennia germinans	-85.6663	11.0478		CR		Puerto Soley, Salina en el manglar.	TRUE	TRUE	TRUE	TRUE	TRUE	TRUE	TRUE	TRUE	TRUE	TRUE
867	44296930	Avicennia	germinans	Avicennia germinans	-85.66	10.8		CR		P.N. Santa Rosa Manilkara Forest. Mangrove area dry forested hill above mangrove area across salt flat near Manikara	TRUE	TRUE	TRUE	TRUE	TRUE	TRUE	TRUE	TRUE	TRUE	TRUE
868	44296912	Avicennia	germinans	Avicennia germinans	-85.66	10.8		CR		P.N. Santa Rosa Manilkara Forest. 1 km left of fork in road to Playa Naranjo	TRUE	TRUE	TRUE	TRUE	TRUE	TRUE	TRUE	TRUE	TRUE	TRUE
869	1005658507	Avicennia	germinans	Avicennia germinans	-85.66	10.79		CR			TRUE	TRUE	TRUE	TRUE	TRUE	TRUE	TRUE	TRUE	TRUE	TRUE
870	1005741405	Avicennia	germinans	Avicennia germinans	-85.66	10.79		CR			TRUE	TRUE	TRUE	TRUE	TRUE	TRUE	TRUE	TRUE	TRUE	TRUE
871	1005741294	Avicennia	germinans	Avicennia germinans	-85.66	10.79		CR			TRUE	TRUE	TRUE	TRUE	TRUE	TRUE	TRUE	TRUE	TRUE	TRUE
872	1005741360	Avicennia	germinans	Avicennia germinans	-85.66	10.79		CR			TRUE	TRUE	TRUE	TRUE	TRUE	TRUE	TRUE	TRUE	TRUE	TRUE
873	1005741383	Avicennia	germinans	Avicennia germinans	-85.66	10.79		CR			TRUE	TRUE	TRUE	TRUE	TRUE	TRUE	TRUE	TRUE	TRUE	TRUE
874	1005658495	Avicennia	germinans	Avicennia germinans	-85.66	10.79		CR			TRUE	TRUE	TRUE	TRUE	TRUE	TRUE	TRUE	TRUE	TRUE	TRUE
875	1005598870	Avicennia	germinans	Avicennia germinans	-85.66	10.79		CR			TRUE	TRUE	TRUE	TRUE	TRUE	TRUE	TRUE	TRUE	TRUE	TRUE
876	1005658501	Avicennia	germinans	Avicennia germinans	-85.66	10.79		CR			TRUE	TRUE	TRUE	TRUE	TRUE	TRUE	TRUE	TRUE	TRUE	TRUE
877	1005741331	Avicennia	germinans	Avicennia germinans	-85.66	10.79		CR			TRUE	TRUE	TRUE	TRUE	TRUE	TRUE	TRUE	TRUE	TRUE	TRUE
878	1005736743	Avicennia	germinans	Avicennia germinans	-85.66	10.79		CR			TRUE	TRUE	TRUE	TRUE	TRUE	TRUE	TRUE	TRUE	TRUE	TRUE
879	1005658569	Avicennia	germinans	Avicennia germinans	-85.66	10.79		CR			TRUE	TRUE	TRUE	TRUE	TRUE	TRUE	TRUE	TRUE	TRUE	TRUE
880	1005736716	Avicennia	germinans	Avicennia germinans	-85.66	10.79		CR			TRUE	TRUE	TRUE	TRUE	TRUE	TRUE	TRUE	TRUE	TRUE	TRUE
881	379588672	Avicennia	germinans	Avicennia germinans	-85.6556	10.7917		CR		Camino a Playa Naranjo.	TRUE	TRUE	TRUE	TRUE	TRUE	TRUE	TRUE	TRUE	TRUE	TRUE
882	379588673	Avicennia	germinans	Avicennia germinans	-85.6556	10.7917		CR		Camino a Playa Naranjo.	TRUE	TRUE	TRUE	TRUE	TRUE	TRUE	TRUE	TRUE	TRUE	TRUE
883	379588674	Avicennia	germinans	Avicennia germinans	-85.6556	10.7917		CR		Camino a Playa Naranjo.	TRUE	TRUE	TRUE	TRUE	TRUE	TRUE	TRUE	TRUE	TRUE	TRUE
884	379588670	Avicennia	germinans	Avicennia germinans	-85.6556	10.7917		CR		Camino a Playa Naranjo.	TRUE	TRUE	TRUE	TRUE	TRUE	TRUE	TRUE	TRUE	TRUE	TRUE
885	379588671	Avicennia	germinans	Avicennia germinans	-85.6556	10.7917		CR		Camino a Playa Naranjo.	TRUE	TRUE	TRUE	TRUE	TRUE	TRUE	TRUE	TRUE	TRUE	TRUE
886	379588250	Avicennia	germinans	Avicennia germinans	-85.65	10.7931		CR		Sitio Ojochal. Playa Naranjo.	TRUE	TRUE	TRUE	TRUE	TRUE	TRUE	TRUE	TRUE	TRUE	TRUE
887	441663096	Avicennia	germinans	Avicennia germinans	-85.65	10.7931		CR		Sitio Ojochal. Parque Nacional Santa Rosa. Creciendo en Ã¡rea de manglar.	TRUE	TRUE	TRUE	TRUE	TRUE	TRUE	TRUE	TRUE	TRUE	TRUE
888	44305284	Avicennia	germinans	Avicennia germinans	-85.65	10.79		CR		P. N. Santa Rosa Cuenca del Papagayo. 4 km despuÃ©s del cruce a playa Naranjo.	TRUE	TRUE	TRUE	TRUE	TRUE	TRUE	TRUE	TRUE	TRUE	TRUE
889	44301920	Avicennia	germinans	Avicennia germinans	-85.65	10.79		CR		P.N. Santa Rosa Sitio Ojochal	TRUE	TRUE	TRUE	TRUE	TRUE	TRUE	TRUE	TRUE	TRUE	TRUE
890	319179374	Avicennia	germinans	Avicennia germinans	-85.65	10.79	NORTH_AMERICA	CR		P.N. Santa Rosa; Faja CosteÃ±a del Golfo de Papagayo. Sitio Ojochal. Playa Naranjo.	TRUE	TRUE	TRUE	TRUE	TRUE	TRUE	TRUE	TRUE	TRUE	TRUE
891	319179675	Avicennia	germinans	Avicennia germinans	-85.64	10.83	NORTH_AMERICA	CR		Parque Nacional Santa Rosa. Road to Estero Real. Tropical deciduous forest	TRUE	TRUE	TRUE	TRUE	TRUE	TRUE	TRUE	TRUE	TRUE	TRUE
892	319179658	Avicennia	germinans	Avicennia germinans	-85.62	10.83	NORTH_AMERICA	CR		Santa Rosa National Park	TRUE	TRUE	TRUE	TRUE	TRUE	TRUE	TRUE	TRUE	TRUE	TRUE
893	379588284	Avicennia	germinans	Avicennia germinans	-85.6114	10.8153		CR		Estacion Santa Rosa, camino a Playa Naranjo.	TRUE	TRUE	TRUE	TRUE	TRUE	TRUE	TRUE	TRUE	TRUE	TRUE
894	379588816	Avicennia	germinans	Avicennia germinans	-85.6083	10.875		CR		Cercanias del Mirador Santa Elena, entrada principal al Parque Santa Rosa.	TRUE	TRUE	TRUE	TRUE	TRUE	TRUE	TRUE	TRUE	TRUE	TRUE
895	379588940	Avicennia	germinans	Avicennia germinans	-85.3549	10.3156		CR		Puerto Humo.	TRUE	TRUE	TRUE	TRUE	TRUE	TRUE	TRUE	TRUE	TRUE	TRUE
901	379588261	Avicennia	germinans	Avicennia germinans	-85.3428	9.83222		CR		Playa Bejuco. Estero Bejuco.	TRUE	TRUE	TRUE	TRUE	TRUE	TRUE	TRUE	TRUE	TRUE	TRUE
902	214454513	Avicennia	germinans	Avicennia germinans	-85.34	10.34		CR		Guanacaste: Bagaces. P.N. Palo Verde. Cuenca del Tempisque. Laguna Palo Verde. Frente a Isla PÃ¡jaro. A orilla de RÃ­o Tempisque	TRUE	TRUE	TRUE	TRUE	TRUE	TRUE	TRUE	TRUE	TRUE	TRUE
903	44302691	Avicennia	germinans	Avicennia germinans	-85.34	9.83		CR		Playas Bejuco.Estero Bejuco	TRUE	TRUE	TRUE	TRUE	TRUE	TRUE	TRUE	TRUE	TRUE	TRUE
904	379588964	Avicennia	germinans	Avicennia germinans	-85.3194	10.3236		CR		Isla Pajaros	TRUE	TRUE	TRUE	TRUE	TRUE	TRUE	TRUE	TRUE	TRUE	TRUE
905	379588963	Avicennia	germinans	Avicennia germinans	-85.3194	10.3236		CR		Isla Pajaros	TRUE	TRUE	TRUE	TRUE	TRUE	TRUE	TRUE	TRUE	TRUE	TRUE
906	379588962	Avicennia	germinans	Avicennia germinans	-85.3194	10.3236		CR		Isla Pajaros	TRUE	TRUE	TRUE	TRUE	TRUE	TRUE	TRUE	TRUE	TRUE	TRUE
907	379588965	Avicennia	germinans	Avicennia germinans	-85.3194	10.3236		CR		Isla Pajaros	TRUE	TRUE	TRUE	TRUE	TRUE	TRUE	TRUE	TRUE	TRUE	TRUE
908	44296850	Avicennia	germinans	Avicennia germinans	-85.3	10.34		CR		P.N. Palo Verde Comelco Ranch	TRUE	TRUE	TRUE	TRUE	TRUE	TRUE	TRUE	TRUE	TRUE	TRUE
909	379588878	Avicennia	germinans	Avicennia germinans	-85.2672	10.1418		CR		Estero Letras	TRUE	TRUE	TRUE	TRUE	TRUE	TRUE	TRUE	TRUE	TRUE	TRUE
910	379588875	Avicennia	germinans	Avicennia germinans	-85.2672	10.1418		CR		Estero Letras	TRUE	TRUE	TRUE	TRUE	TRUE	TRUE	TRUE	TRUE	TRUE	TRUE
911	379588876	Avicennia	germinans	Avicennia germinans	-85.2672	10.1418		CR		Estero Letras	TRUE	TRUE	TRUE	TRUE	TRUE	TRUE	TRUE	TRUE	TRUE	TRUE
912	379588877	Avicennia	germinans	Avicennia germinans	-85.2672	10.1418		CR		Estero Letras	TRUE	TRUE	TRUE	TRUE	TRUE	TRUE	TRUE	TRUE	TRUE	TRUE
913	379588271	Avicennia	germinans	Avicennia germinans	-85.2611	10.3097		CR		Estacion Catalina, Laguna Nicaragua. Estero.	TRUE	TRUE	TRUE	TRUE	TRUE	TRUE	TRUE	TRUE	TRUE	TRUE
914	319180155	Avicennia	germinans	Avicennia germinans	-85.25	10.27	NORTH_AMERICA	CR		Parque Nacional Palo Verde Ribera de RÃ­os Bebedero y Tempisque. Estero frente a Palmita, Catalina. Estero Guacimal.	TRUE	TRUE	TRUE	TRUE	TRUE	TRUE	TRUE	TRUE	TRUE	TRUE
915	379588249	Avicennia	germinans	Avicennia germinans	-85.25	10.2667		CR		Ribera de Rios Bebedero y Tempisque. Estero frente a Palmita, Catalina. Estero Guacimal.	TRUE	TRUE	TRUE	TRUE	TRUE	TRUE	TRUE	TRUE	TRUE	TRUE
916	44302486	Avicennia	germinans	Avicennia germinans	-85.25	10.26		CR		P.N. Palo Verde Ribera de RÃ­os Bebedero y Tempisque.Estero frente a Palmita, Catalina.Estero Guacimal	TRUE	TRUE	TRUE	TRUE	TRUE	TRUE	TRUE	TRUE	TRUE	TRUE
917	379588957	Avicennia	germinans	Avicennia germinans	-85.235	10.2546		CR		Guapinol.	TRUE	TRUE	TRUE	TRUE	TRUE	TRUE	TRUE	TRUE	TRUE	TRUE
918	379588956	Avicennia	germinans	Avicennia germinans	-85.235	10.2546		CR		Guapinol.	TRUE	TRUE	TRUE	TRUE	TRUE	TRUE	TRUE	TRUE	TRUE	TRUE
919	379588958	Avicennia	germinans	Avicennia germinans	-85.235	10.2546		CR		Guapinol.	TRUE	TRUE	TRUE	TRUE	TRUE	TRUE	TRUE	TRUE	TRUE	TRUE
921	379588938	Avicennia	germinans	Avicennia germinans	-85.2189	10.286		CR		Sitio Rodeo Medio.	TRUE	TRUE	TRUE	TRUE	TRUE	TRUE	TRUE	TRUE	TRUE	TRUE
922	379588939	Avicennia	germinans	Avicennia germinans	-85.2189	10.286		CR		Sitio Rodeo Medio.	TRUE	TRUE	TRUE	TRUE	TRUE	TRUE	TRUE	TRUE	TRUE	TRUE
923	379588935	Avicennia	germinans	Avicennia germinans	-85.2171	10.3093		CR		Ca?as, sitio Rodeo Medio.	TRUE	TRUE	TRUE	TRUE	TRUE	TRUE	TRUE	TRUE	TRUE	TRUE
924	379588936	Avicennia	germinans	Avicennia germinans	-85.2171	10.3093		CR		Ca?as, sitio Rodeo Medio.	TRUE	TRUE	TRUE	TRUE	TRUE	TRUE	TRUE	TRUE	TRUE	TRUE
925	379588937	Avicennia	germinans	Avicennia germinans	-85.2171	10.3093		CR		Ca?as, sitio Rodeo Medio.	TRUE	TRUE	TRUE	TRUE	TRUE	TRUE	TRUE	TRUE	TRUE	TRUE
926	44302886	Avicennia	germinans	Avicennia germinans	-85.21	10.35		CR		P.N. Palo Verde Sector Catalina.Laguna Nicaragua, Estero	TRUE	TRUE	TRUE	TRUE	TRUE	TRUE	TRUE	TRUE	TRUE	TRUE
970	666321481	Avicennia	germinans	Avicennia germinans	-84.8333	10	NORTH_AMERICA	CR			TRUE	TRUE	TRUE	TRUE	TRUE	TRUE	TRUE	TRUE	TRUE	TRUE
971	379589046	Avicennia	germinans	Avicennia germinans	-84.8281	10.0008		CR		Finca El Palmar. Orillas del manglar.	TRUE	TRUE	TRUE	TRUE	TRUE	TRUE	TRUE	TRUE	TRUE	TRUE
972	379589047	Avicennia	germinans	Avicennia germinans	-84.8281	10.0008		CR		Finca El Palmar. Orillas del manglar.	TRUE	TRUE	TRUE	TRUE	TRUE	TRUE	TRUE	TRUE	TRUE	TRUE
973	377233251	Avicennia	germinans	Avicennia germinans	-84.8281	10.0008		CR		Finca El Palmar. Orillas del manglar.	TRUE	TRUE	TRUE	TRUE	TRUE	TRUE	TRUE	TRUE	TRUE	TRUE
974	377233249	Avicennia	germinans	Avicennia germinans	-84.8281	10.0008		CR		Finca El Palmar. Orillas del manglar.	TRUE	TRUE	TRUE	TRUE	TRUE	TRUE	TRUE	TRUE	TRUE	TRUE
975	377233252	Avicennia	germinans	Avicennia germinans	-84.8281	10.0008		CR		Finca El Palmar. Orillas del manglar.	TRUE	TRUE	TRUE	TRUE	TRUE	TRUE	TRUE	TRUE	TRUE	TRUE
976	379589048	Avicennia	germinans	Avicennia germinans	-84.8281	10.0008		CR		Finca El Palmar. Orillas del manglar.	TRUE	TRUE	TRUE	TRUE	TRUE	TRUE	TRUE	TRUE	TRUE	TRUE
977	377233250	Avicennia	germinans	Avicennia germinans	-84.8281	10.0008		CR		Finca El Palmar. Orillas del manglar.	TRUE	TRUE	TRUE	TRUE	TRUE	TRUE	TRUE	TRUE	TRUE	TRUE
978	44296566	Avicennia	germinans	Avicennia germinans	-84.73	9.96		CR		Boca de Barranca.	TRUE	TRUE	TRUE	TRUE	TRUE	TRUE	TRUE	TRUE	TRUE	TRUE
979	44296508	Avicennia	germinans	Avicennia germinans	-84.73	9.96		CR		Boca de Barranca.	TRUE	TRUE	TRUE	TRUE	TRUE	TRUE	TRUE	TRUE	TRUE	TRUE
980	44296498	Avicennia	germinans	Avicennia germinans	-84.72	9.93		CR		En la costa de Caldera, Puntarenas	TRUE	TRUE	TRUE	TRUE	TRUE	TRUE	TRUE	TRUE	TRUE	TRUE
981	379589072	Avicennia	germinans	Avicennia germinans	-84.7167	9.92861		CR		Por Caldera.	TRUE	TRUE	TRUE	TRUE	TRUE	TRUE	TRUE	TRUE	TRUE	TRUE
982	379589073	Avicennia	germinans	Avicennia germinans	-84.7167	9.92861		CR		Por Caldera.	TRUE	TRUE	TRUE	TRUE	TRUE	TRUE	TRUE	TRUE	TRUE	TRUE
983	379589074	Avicennia	germinans	Avicennia germinans	-84.7167	9.92861		CR		Por Caldera.	TRUE	TRUE	TRUE	TRUE	TRUE	TRUE	TRUE	TRUE	TRUE	TRUE
984	44296884	Avicennia	germinans	Avicennia germinans	-84.71	9.93		CR		Mata de LimÃ³n.	TRUE	TRUE	TRUE	TRUE	TRUE	TRUE	TRUE	TRUE	TRUE	TRUE
985	379589079	Avicennia	germinans	Avicennia germinans	-84.7017	9.88272		CR		Z. P. Tivives. Bosque secundario y mangle frente a casa de guardaparque.	TRUE	TRUE	TRUE	TRUE	TRUE	TRUE	TRUE	TRUE	TRUE	TRUE
986	379589075	Avicennia	germinans	Avicennia germinans	-84.7017	9.88272		CR		Z. P. Tivives. Bosque secundario y mangle frente a casa de guardaparque.	TRUE	TRUE	TRUE	TRUE	TRUE	TRUE	TRUE	TRUE	TRUE	TRUE
987	379589076	Avicennia	germinans	Avicennia germinans	-84.7017	9.88272		CR		Z. P. Tivives. Bosque secundario y mangle frente a casa de guardaparque.	TRUE	TRUE	TRUE	TRUE	TRUE	TRUE	TRUE	TRUE	TRUE	TRUE
988	379589077	Avicennia	germinans	Avicennia germinans	-84.7017	9.88272		CR		Z. P. Tivives. Bosque secundario y mangle frente a casa de guardaparque.	TRUE	TRUE	TRUE	TRUE	TRUE	TRUE	TRUE	TRUE	TRUE	TRUE
989	379589078	Avicennia	germinans	Avicennia germinans	-84.7017	9.88272		CR		Z. P. Tivives. Bosque secundario y mangle frente a casa de guardaparque.	TRUE	TRUE	TRUE	TRUE	TRUE	TRUE	TRUE	TRUE	TRUE	TRUE
990	44296971	Avicennia	germinans	Avicennia germinans	-84.7	9.88		CR		Z.P. Tivives	TRUE	TRUE	TRUE	TRUE	TRUE	TRUE	TRUE	TRUE	TRUE	TRUE
995	379588809	Avicennia	germinans	Avicennia germinans	-84.6556	9.72222		CR		Punta Agujas. Playa Agujas. Bosque primario, residual.	TRUE	TRUE	TRUE	TRUE	TRUE	TRUE	TRUE	TRUE	TRUE	TRUE
996	379588806	Avicennia	germinans	Avicennia germinans	-84.6556	9.72222		CR		Punta Agujas. Playa Agujas. Bosque primario, residual.	TRUE	TRUE	TRUE	TRUE	TRUE	TRUE	TRUE	TRUE	TRUE	TRUE
997	379588807	Avicennia	germinans	Avicennia germinans	-84.6556	9.72222		CR		Punta Agujas. Playa Agujas. Bosque primario, residual.	TRUE	TRUE	TRUE	TRUE	TRUE	TRUE	TRUE	TRUE	TRUE	TRUE
998	379588810	Avicennia	germinans	Avicennia germinans	-84.6556	9.72222		CR		Punta Agujas. Playa Agujas. Bosque primario, residual.	TRUE	TRUE	TRUE	TRUE	TRUE	TRUE	TRUE	TRUE	TRUE	TRUE
999	379588808	Avicennia	germinans	Avicennia germinans	-84.6556	9.72222		CR		Punta Agujas. Playa Agujas. Bosque primario, residual.	TRUE	TRUE	TRUE	TRUE	TRUE	TRUE	TRUE	TRUE	TRUE	TRUE
1000	44296958	Avicennia	germinans	Avicennia germinans	-84.63	9.8		CR		Manglar de Guacalillo.	TRUE	TRUE	TRUE	TRUE	TRUE	TRUE	TRUE	TRUE	TRUE	TRUE
1001	44296960	Avicennia	germinans	Avicennia germinans	-84.63	9.8		CR		Manglar de Guacalillo.	TRUE	TRUE	TRUE	TRUE	TRUE	TRUE	TRUE	TRUE	TRUE	TRUE
1002	319179680	Avicennia	germinans	Avicennia germinans	-84.63	9.77	NORTH_AMERICA	CR		CantÃ³n de Garabito. Cuenca del TÃ¡rcoles. Tarcoles. Bordeando areas de manglar.	TRUE	TRUE	TRUE	TRUE	TRUE	TRUE	TRUE	TRUE	TRUE	TRUE
1003	379588518	Avicennia	germinans	Avicennia germinans	-84.6275	9.77028		CR		Tarcoles. Potreros aledanos al pueblo.	TRUE	TRUE	TRUE	TRUE	TRUE	TRUE	TRUE	TRUE	TRUE	TRUE
1004	379588521	Avicennia	germinans	Avicennia germinans	-84.6275	9.77028		CR		Tarcoles. Potreros aledanos al pueblo.	TRUE	TRUE	TRUE	TRUE	TRUE	TRUE	TRUE	TRUE	TRUE	TRUE
1005	379588519	Avicennia	germinans	Avicennia germinans	-84.6275	9.77028		CR		Tarcoles. Potreros aledanos al pueblo.	TRUE	TRUE	TRUE	TRUE	TRUE	TRUE	TRUE	TRUE	TRUE	TRUE
1006	379588520	Avicennia	germinans	Avicennia germinans	-84.6275	9.77028		CR		Tarcoles. Potreros aledanos al pueblo.	TRUE	TRUE	TRUE	TRUE	TRUE	TRUE	TRUE	TRUE	TRUE	TRUE
1011	379588265	Avicennia	germinans	Avicennia germinans	-84.4278	9.51944		CR		Esterillos este, manglar en el area de Estero Bejuco.	TRUE	TRUE	TRUE	TRUE	TRUE	TRUE	TRUE	TRUE	TRUE	TRUE
1014	379588997	Avicennia	germinans	Avicennia germinans	-84.3417	9.5		CR		Isla Palo Seco. Boca del Rio Parrita.	TRUE	TRUE	TRUE	TRUE	TRUE	TRUE	TRUE	TRUE	TRUE	TRUE
1015	379588994	Avicennia	germinans	Avicennia germinans	-84.3417	9.5		CR		Isla Palo Seco. Boca del Rio Parrita.	TRUE	TRUE	TRUE	TRUE	TRUE	TRUE	TRUE	TRUE	TRUE	TRUE
1016	379588996	Avicennia	germinans	Avicennia germinans	-84.3417	9.5		CR		Isla Palo Seco. Boca del Rio Parrita.	TRUE	TRUE	TRUE	TRUE	TRUE	TRUE	TRUE	TRUE	TRUE	TRUE
1017	379588995	Avicennia	germinans	Avicennia germinans	-84.3417	9.5		CR		Isla Palo Seco. Boca del Rio Parrita.	TRUE	TRUE	TRUE	TRUE	TRUE	TRUE	TRUE	TRUE	TRUE	TRUE
1018	44296903	Avicennia	germinans	Avicennia germinans	-84.32	9.49		CR		Cerca del puente a Palo Seco, estero Meros.	TRUE	TRUE	TRUE	TRUE	TRUE	TRUE	TRUE	TRUE	TRUE	TRUE
1019	44296882	Avicennia	germinans	Avicennia germinans	-84.32	9.49		CR		Cerca del puente a Palo Seco, estero Meros.	TRUE	TRUE	TRUE	TRUE	TRUE	TRUE	TRUE	TRUE	TRUE	TRUE
1020	44296902	Avicennia	germinans	Avicennia germinans	-84.32	9.49		CR		Cerca del puente a Palo Seco, estero Meros.	TRUE	TRUE	TRUE	TRUE	TRUE	TRUE	TRUE	TRUE	TRUE	TRUE
1021	44296919	Avicennia	germinans	Avicennia germinans	-84.25	9.48		CR		Palo Seco	TRUE	TRUE	TRUE	TRUE	TRUE	TRUE	TRUE	TRUE	TRUE	TRUE
1022	44297122	Avicennia	germinans	Avicennia germinans	-84.16	9.42		CR		Puerto Quepos, mangrove swamp.	TRUE	TRUE	TRUE	TRUE	TRUE	TRUE	TRUE	TRUE	TRUE	TRUE
1024	379589010	Avicennia	germinans	Avicennia germinans	-83.85	9.24167		CR		Playa Dominical, Rocas Amancio.	TRUE	TRUE	TRUE	TRUE	TRUE	TRUE	TRUE	TRUE	TRUE	TRUE
1025	379589008	Avicennia	germinans	Avicennia germinans	-83.85	9.24167		CR		Playa Dominical, Rocas Amancio.	TRUE	TRUE	TRUE	TRUE	TRUE	TRUE	TRUE	TRUE	TRUE	TRUE
1026	379589011	Avicennia	germinans	Avicennia germinans	-83.85	9.24167		CR		Playa Dominical, Rocas Amancio.	TRUE	TRUE	TRUE	TRUE	TRUE	TRUE	TRUE	TRUE	TRUE	TRUE
1027	379589009	Avicennia	germinans	Avicennia germinans	-83.85	9.24167		CR		Playa Dominical, Rocas Amancio.	TRUE	TRUE	TRUE	TRUE	TRUE	TRUE	TRUE	TRUE	TRUE	TRUE
1028	379589012	Avicennia	germinans	Avicennia germinans	-83.85	9.24167		CR		Playa Dominical, Rocas Amancio.	TRUE	TRUE	TRUE	TRUE	TRUE	TRUE	TRUE	TRUE	TRUE	TRUE
1031	319179326	Avicennia	germinans	Avicennia germinans	-83.77	11.52	NORTH_AMERICA	NI		La Barra de Punta Gorda	TRUE	TRUE	TRUE	TRUE	TRUE	TRUE	TRUE	TRUE	TRUE	TRUE
1032	379588258	Avicennia	germinans	Avicennia germinans	-83.7667	9.18333		CR		Manglar detras de Punta Uvita. Detras de la Estacion del Parque Marino Ballena.	TRUE	TRUE	TRUE	TRUE	TRUE	TRUE	TRUE	TRUE	TRUE	TRUE
1033	319179375	Avicennia	germinans	Avicennia germinans	-83.76	9.18	NORTH_AMERICA	CR		Faja CosteÃ±a de la BahÃ­a de Coronado. Manglar detrÃ¡s de Punta Uvita. DetrÃ¡s de la EstaciÃ³n del Parque Marino Ballena.	TRUE	TRUE	TRUE	TRUE	TRUE	TRUE	TRUE	TRUE	TRUE	TRUE
1034	319179333	Avicennia	germinans	Avicennia germinans	-83.75	12.08	NORTH_AMERICA	NI		Scooner Cay, RÃ­o Escondido, BahÃ­a de Bluefields; pantanos	TRUE	TRUE	TRUE	TRUE	TRUE	TRUE	TRUE	TRUE	TRUE	TRUE
1038	319179324	Avicennia	germinans	Avicennia germinans	-83.67	11.67	NORTH_AMERICA	NI		Monkey Point, 1.5 km al NW; pluvioselva	TRUE	TRUE	TRUE	TRUE	TRUE	TRUE	TRUE	TRUE	TRUE	TRUE
1039	319179325	Avicennia	germinans	Avicennia germinans	-83.67	11.67	NORTH_AMERICA	NI		Monkey Point, 1.5 km al NW; pluvioselva	TRUE	TRUE	TRUE	TRUE	TRUE	TRUE	TRUE	TRUE	TRUE	TRUE
1045	920683275	Avicennia	germinans	Avicennia germinans	-83.6025	8.79755		CR		Rio Sierpe	TRUE	TRUE	TRUE	TRUE	TRUE	TRUE	TRUE	TRUE	TRUE	TRUE
1046	379588282	Avicennia	germinans	Avicennia germinans	-83.5917	8.48056		CR		Sirena. Desembocadura Rio Corcovado, area de manglar	TRUE	TRUE	TRUE	TRUE	TRUE	TRUE	TRUE	TRUE	TRUE	TRUE
1047	319179555	Avicennia	germinans	Avicennia germinans	-83.59	8.48	NORTH_AMERICA	CR		P.N. Corcovado. Peninsula de Osa. Estacion Sirena. En desembocadura del Rio Corcovado.	TRUE	TRUE	TRUE	TRUE	TRUE	TRUE	TRUE	TRUE	TRUE	TRUE
1048	44303067	Avicennia	germinans	Avicennia germinans	-83.59	8.48		CR		P.N. Corcovado Desembocadura RÃ­o Corcovado	TRUE	TRUE	TRUE	TRUE	TRUE	TRUE	TRUE	TRUE	TRUE	TRUE
1049	379588862	Avicennia	germinans	Avicennia germinans	-83.4964	8.82694		CR		Camino hacia San Juana de Sierpe; areas alteradas y bosques remanentes.	TRUE	TRUE	TRUE	TRUE	TRUE	TRUE	TRUE	TRUE	TRUE	TRUE
1050	379588864	Avicennia	germinans	Avicennia germinans	-83.4964	8.82694		CR		Camino hacia San Juana de Sierpe; areas alteradas y bosques remanentes.	TRUE	TRUE	TRUE	TRUE	TRUE	TRUE	TRUE	TRUE	TRUE	TRUE
1051	379588863	Avicennia	germinans	Avicennia germinans	-83.4964	8.82694		CR		Camino hacia San Juana de Sierpe; areas alteradas y bosques remanentes.	TRUE	TRUE	TRUE	TRUE	TRUE	TRUE	TRUE	TRUE	TRUE	TRUE
1056	319179406	Avicennia	germinans	Avicennia germinans	-83.4	14.02	NORTH_AMERICA	NI		Beach SW of Puerto Cabezas, around mouth of small stream; sand beach and dense low forest immediately behind beach.	TRUE	TRUE	TRUE	TRUE	TRUE	TRUE	TRUE	TRUE	TRUE	TRUE
1059	319179421	Avicennia	germinans	Avicennia germinans	-83.33	14.1	NORTH_AMERICA	NI		Pozo Verde, 10 km NE de Puerto Cabezas	TRUE	TRUE	TRUE	TRUE	TRUE	TRUE	TRUE	TRUE	TRUE	TRUE
1065	911920548	Avicennia	germinans	Avicennia germinans	-83.2927	22.9531		CU		Playa del Altura	TRUE	TRUE	TRUE	TRUE	TRUE	TRUE	TRUE	TRUE	TRUE	TRUE
1066	911920553	Avicennia	germinans	Avicennia germinans	-83.2833	22.95		CU		Alrededores de Playa La Altura, monte seco y zona transicional de manglares	TRUE	TRUE	TRUE	TRUE	TRUE	TRUE	TRUE	TRUE	TRUE	TRUE
1067	319179485	Avicennia	germinans	Avicennia germinans	-83.2	14.32	NORTH_AMERICA	NI		Vicinity of Awastara; sandy savanna, freshwater swamp, mangroves and ocean beach.	TRUE	TRUE	TRUE	TRUE	TRUE	TRUE	TRUE	TRUE	TRUE	TRUE
1068	44300035	Avicennia	germinans	Avicennia germinans	-83.18	8.63		CR			TRUE	TRUE	TRUE	TRUE	TRUE	TRUE	TRUE	TRUE	TRUE	TRUE
1069	44300009	Avicennia	germinans	Avicennia germinans	-83.18	8.63		CR			TRUE	TRUE	TRUE	TRUE	TRUE	TRUE	TRUE	TRUE	TRUE	TRUE
1070	44302995	Avicennia	germinans	Avicennia germinans	-83.15	8.61		CR		Near mouth of RÃ­o Colorado, 8 km S of Golfito	TRUE	TRUE	TRUE	TRUE	TRUE	TRUE	TRUE	TRUE	TRUE	TRUE
1072	319179621	Avicennia	germinans	Avicennia germinans	-82.88	8.23	NORTH_AMERICA	PA		Proyecto del Oleoducto Transistmico (E.A.S.A), playa cerca del km 3.	TRUE	TRUE	TRUE	TRUE	TRUE	TRUE	TRUE	TRUE	TRUE	TRUE
1074	473279356	Avicennia	germinans	Avicennia germinans	-82.8167	21.9167	NORTH_AMERICA	CU		Playa Gerona. ÃŽle des Pins	TRUE	TRUE	TRUE	TRUE	TRUE	TRUE	TRUE	TRUE	TRUE	TRUE
1075	214454514	Avicennia	germinans	Avicennia germinans	-82.62	9.6		CR		LimÃ³n: Talamanca. R.V.S. Gandoca-Manzanillo. Puerto Viejo; Gandoca hacia Punta Mona, por la costa, creciendo tanto en manglar, como aislado, en la costa	TRUE	TRUE	TRUE	TRUE	TRUE	TRUE	TRUE	TRUE	TRUE	TRUE
1076	379588815	Avicennia	germinans	Avicennia germinans	-82.6167	9.60715		CR		Sector Gandoca, desembocadura del Rio Mile Creek	TRUE	TRUE	TRUE	TRUE	TRUE	TRUE	TRUE	TRUE	TRUE	TRUE
1077	379588814	Avicennia	germinans	Avicennia germinans	-82.6167	9.60715		CR		Sector Gandoca, desembocadura del Rio Mile Creek	TRUE	TRUE	TRUE	TRUE	TRUE	TRUE	TRUE	TRUE	TRUE	TRUE
1078	319179646	Avicennia	germinans	Avicennia germinans	-82.38	9.25	NORTH_AMERICA	PA		Water Valley, vicinity of ChiriquÃ­ Lagoon	TRUE	TRUE	TRUE	TRUE	TRUE	TRUE	TRUE	TRUE	TRUE	TRUE
1079	473279352	Avicennia	germinans	Avicennia germinans	-82.2906	22.72	NORTH_AMERICA	CU		BatabanÃ³	TRUE	TRUE	TRUE	TRUE	TRUE	TRUE	TRUE	TRUE	TRUE	TRUE
1080	473279351	Avicennia	germinans	Avicennia germinans	-82.235	23.104	NORTH_AMERICA	CU		Guanabacoa	TRUE	TRUE	TRUE	TRUE	TRUE	TRUE	TRUE	TRUE	TRUE	TRUE
1082	56520421	Avicennia	germinans	Avicennia germinans	-81.8333	26.2833	NORTH_AMERICA	US	Collier	3 mi SW of Bonita Springs. Barefoot Beach County Preserve, 1 mi. N of Wiggins Pass, W of Colohatchee River	TRUE	TRUE	TRUE	TRUE	TRUE	TRUE	TRUE	TRUE	TRUE	TRUE
1084	122907693	Avicennia	germinans	Avicennia germinans	-81.3542	24.6694	NORTH_AMERICA	US	Monroe	Big Pine Key, Watson Wildlife Trail	TRUE	TRUE	TRUE	TRUE	TRUE	TRUE	TRUE	TRUE	TRUE	TRUE
1085	1065599488	Avicennia	germinans	Avicennia germinans	-81.308	29.9051		US			TRUE	TRUE	TRUE	TRUE	TRUE	TRUE	TRUE	TRUE	TRUE	TRUE
1089	920683183	Avicennia	germinans	Avicennia germinans	-80.8506	25.2146		US		Everglades NP, West Lake Park Station	TRUE	TRUE	TRUE	TRUE	TRUE	TRUE	TRUE	TRUE	TRUE	TRUE
1090	920683182	Avicennia	germinans	Avicennia germinans	-80.8168	24.8138		US		Long Key State Park	TRUE	TRUE	TRUE	TRUE	TRUE	TRUE	TRUE	TRUE	TRUE	TRUE
1092	319179678	Avicennia	germinans	Avicennia germinans	-80.53	8.27	NORTH_AMERICA	PA		A orillas del camino que va desde el puerto de Aguaduice hasta el (pueblo). MÃ¡s o menos 2 Kms. del Puerto.	TRUE	TRUE	TRUE	TRUE	TRUE	TRUE	TRUE	TRUE	TRUE	TRUE
1093	319179743	Avicennia	germinans	Avicennia germinans	-80.53	8.16	NORTH_AMERICA	PA		On Isla del Pozo in alvinas (salt flats) of RÃ­o Estero Salado. [Coordinates on orginal label: 08.11N 080.30W] Island of dry forest surrounded by periodically (tidally) inundated flats.	TRUE	TRUE	TRUE	TRUE	TRUE	TRUE	TRUE	TRUE	TRUE	TRUE
1094	920683199	Avicennia	germinans	Avicennia germinans	-80.5059	25.0295		US		Florida Keys Wild Bird Rehabilitation Center & Sanctuary	TRUE	TRUE	TRUE	TRUE	TRUE	TRUE	TRUE	TRUE	TRUE	TRUE
1095	319179318	Avicennia	germinans	Avicennia germinans	-80.47	-3.5	SOUTH_AMERICA	PE		Estuaries ner Puerto Pizzaro. Sea level. Mangrove and grassy sand areas between beach and mangrove.	TRUE	TRUE	TRUE	TRUE	TRUE	TRUE	TRUE	TRUE	TRUE	TRUE
1096	415960218	Avicennia	germinans	Avicennia germinans	-80.4475	25.0861		US	Monroe County	Key Largo	TRUE	TRUE	TRUE	TRUE	TRUE	TRUE	TRUE	TRUE	TRUE	TRUE
1097	920683242	Avicennia	germinans	Avicennia germinans	-80.4089	25.1242		US		John Pennekamp Coral Reef State Park, Key Largo	TRUE	TRUE	TRUE	TRUE	TRUE	TRUE	TRUE	TRUE	TRUE	TRUE
1098	319179620	Avicennia	germinans	Avicennia germinans	-80.37	7.96	NORTH_AMERICA	PA		Salinas de Chitre	TRUE	TRUE	TRUE	TRUE	TRUE	TRUE	TRUE	TRUE	TRUE	TRUE
1099	319179628	Avicennia	germinans	Avicennia germinans	-80.35	7.97	NORTH_AMERICA	PA		Playa de Monagre.	TRUE	TRUE	TRUE	TRUE	TRUE	TRUE	TRUE	TRUE	TRUE	TRUE
1100	473279358	Avicennia	germinans	Avicennia germinans	-80.321	21.977	NORTH_AMERICA	CU		GavilÃ¡n	TRUE	TRUE	TRUE	TRUE	TRUE	TRUE	TRUE	TRUE	TRUE	TRUE
1102	319179348	Avicennia	germinans	Avicennia germinans	-80.22	-2.78	SOUTH_AMERICA	EC		Isla PunÃ . Vicinity of Bellavista. Xerophytic scrub with cacti, Croton, Cordia and Ipomoea.	TRUE	TRUE	TRUE	TRUE	TRUE	TRUE	TRUE	TRUE	TRUE	TRUE
1104	47728289	Avicennia	germinans	Avicennia germinans	-80.216	-2.783	SOUTH_AMERICA	EC		Isla PunÃ . Vicinity of Bellavista. Xerophytic scrub with cacti, Croton, Cordia and Ipomoea.	TRUE	TRUE	TRUE	TRUE	TRUE	TRUE	TRUE	TRUE	TRUE	TRUE
1106	319179435	Avicennia	germinans	Avicennia germinans	-80.05	0.03	SOUTH_AMERICA	EC		4 km south of Pedernales, along coast. Mangrove vegetation converted to shrimp pond.	TRUE	TRUE	TRUE	TRUE	TRUE	TRUE	TRUE	TRUE	TRUE	TRUE
1107	319180110	Avicennia	germinans	Avicennia germinans	-80.05	-3.33	SOUTH_AMERICA	EC		Arch. JambelÃ­. Las Huacas. Bosque seco tropical. FormaciÃ³n de manglar.	TRUE	TRUE	TRUE	TRUE	TRUE	TRUE	TRUE	TRUE	TRUE	TRUE
1109	319179367	Avicennia	germinans	Avicennia germinans	-79.97	-2.17	SOUTH_AMERICA	EC		Bosque Protector Cerro Blanco. Carretera a Salinas, km 15. Bosque seco Tropical. Manglares de Puerto Hondo; suelo inundado con agua salobre.	TRUE	TRUE	TRUE	TRUE	TRUE	TRUE	TRUE	TRUE	TRUE	TRUE
1110	47728599	Avicennia	germinans	Avicennia germinans	-79.95	-2.216	SOUTH_AMERICA	EC		El Guasmo, SW of Guayaquil. Mangrove.	TRUE	TRUE	TRUE	TRUE	TRUE	TRUE	TRUE	TRUE	TRUE	TRUE
1111	319179345	Avicennia	germinans	Avicennia germinans	-79.95	-2.22	SOUTH_AMERICA	EC		El Guasmo, SW of Guayaquil. Mangrove.	TRUE	TRUE	TRUE	TRUE	TRUE	TRUE	TRUE	TRUE	TRUE	TRUE
1112	319179350	Avicennia	germinans	Avicennia germinans	-79.92	-2.73	SOUTH_AMERICA	EC		Isla PunÃ¡. Vicinity of PunÃ¡ Nueva. Disturbed mangrove.	TRUE	TRUE	TRUE	TRUE	TRUE	TRUE	TRUE	TRUE	TRUE	TRUE
1113	319179349	Avicennia	germinans	Avicennia germinans	-79.92	-2.73	SOUTH_AMERICA	EC		Isla PunÃ . Vicinity of PunÃ Nueva. Disturbed salt marshes.	TRUE	TRUE	TRUE	TRUE	TRUE	TRUE	TRUE	TRUE	TRUE	TRUE
1121	319179538	Avicennia	germinans	Avicennia germinans	-79.88	9.37	NORTH_AMERICA	PA		Coco Solo	TRUE	TRUE	TRUE	TRUE	TRUE	TRUE	TRUE	TRUE	TRUE	TRUE
1123	319179937	Avicennia	germinans	Avicennia germinans	-79.87	-1.8	SOUTH_AMERICA	EC		Manglares de Atacames.	TRUE	TRUE	TRUE	TRUE	TRUE	TRUE	TRUE	TRUE	TRUE	TRUE
1124	47727772	Avicennia	germinans	Avicennia germinans	-79.833	0.85	SOUTH_AMERICA	EC		Atacames, SE of Esmeraldas. Disturbed mangrove.	TRUE	TRUE	TRUE	TRUE	TRUE	TRUE	TRUE	TRUE	TRUE	TRUE
1125	319180112	Avicennia	germinans	Avicennia germinans	-79.83	0.87	SOUTH_AMERICA	EC		Atacames. Alrededores del puente. Bosque seco Tropical.	TRUE	TRUE	TRUE	TRUE	TRUE	TRUE	TRUE	TRUE	TRUE	TRUE
1126	319179352	Avicennia	germinans	Avicennia germinans	-79.83	0.85	SOUTH_AMERICA	EC		Atacames, SE of Esmeraldas. Disturbed mangrove.	TRUE	TRUE	TRUE	TRUE	TRUE	TRUE	TRUE	TRUE	TRUE	TRUE
1127	319179357	Avicennia	germinans	Avicennia germinans	-79.83	0.85	SOUTH_AMERICA	EC		Atacames. Estero salado, con manglares, en el pueblo. Bosque seco Tropical.	TRUE	TRUE	TRUE	TRUE	TRUE	TRUE	TRUE	TRUE	TRUE	TRUE
1128	319179358	Avicennia	germinans	Avicennia germinans	-79.83	0.85	SOUTH_AMERICA	EC		Atacames. Estero salado, con manglares, en el pueblo. Bosque seco Tropical.	TRUE	TRUE	TRUE	TRUE	TRUE	TRUE	TRUE	TRUE	TRUE	TRUE
1129	319179936	Avicennia	germinans	Avicennia germinans	-79.75	0.92	SOUTH_AMERICA	EC		Tonsupa, zona urbana, ri!4o Tonsupa.Bosque seco tropical	TRUE	TRUE	TRUE	TRUE	TRUE	TRUE	TRUE	TRUE	TRUE	TRUE
1130	319179362	Avicennia	germinans	Avicennia germinans	-79.67	-2.45	SOUTH_AMERICA	EC		Parroquia Taura. Reserva EcolÃ³gica Manglares-Churute; sector San Alejandro y Cerro Pancho Diablo. Bosque muy seco Tropical y bosque seco Premontano. Transectos de 50 x 2 x 4 m y plantas Ãºtiles.	TRUE	TRUE	TRUE	TRUE	TRUE	TRUE	TRUE	TRUE	TRUE	TRUE
1131	319179363	Avicennia	germinans	Avicennia germinans	-79.67	-2.45	SOUTH_AMERICA	EC		Parroquia Taura. Reserva EcolÃ³gica Manglares-Churute; sector San Alejandro y Cerro Pancho Diablo. Bosque muy seco Tropical y bosque seco Premontano. Transectos de 50 x 2 x 4 m y plantas Ãºtiles.	TRUE	TRUE	TRUE	TRUE	TRUE	TRUE	TRUE	TRUE	TRUE	TRUE
1138	319179672	Avicennia	germinans	Avicennia germinans	-79.11	8.26	NORTH_AMERICA	PA		Isla San JosÃ©	TRUE	TRUE	TRUE	TRUE	TRUE	TRUE	TRUE	TRUE	TRUE	TRUE
1139	319179694	Avicennia	germinans	Avicennia germinans	-79.11	8.26	NORTH_AMERICA	PA		San JosÃ© Island, Perlas archipelago, Gulf of Panama, (about 55 miles SSE of Balboa)	TRUE	TRUE	TRUE	TRUE	TRUE	TRUE	TRUE	TRUE	TRUE	TRUE
1140	319179717	Avicennia	germinans	Avicennia germinans	-79.11	8.26	NORTH_AMERICA	PA		San JosÃ© Island, Perlas archipelago, Gulf of Panama, about 55 miles SSE of Balboa	TRUE	TRUE	TRUE	TRUE	TRUE	TRUE	TRUE	TRUE	TRUE	TRUE
1141	319179320	Avicennia	germinans	Avicennia germinans	-79.08	9.45	NORTH_AMERICA	PA		Trail from CangandÃ­ to dock by Mandinga Airport. Below 30 m. [Coordinates on original label: 9Âº24'N, 79Âº24'W.	TRUE	TRUE	TRUE	TRUE	TRUE	TRUE	TRUE	TRUE	TRUE	TRUE
1145	995457449	Avicennia	germinans	Avicennia germinans	-78.8351	-1.28626	SOUTH_AMERICA	EC		San Lorenzo, around the town.	TRUE	TRUE	TRUE	TRUE	TRUE	TRUE	TRUE	TRUE	TRUE	TRUE
1146	319179972	Avicennia	germinans	Avicennia germinans	-78.56	1.74	SOUTH_AMERICA	CO		Mun. Tumaco: Rio Rosario, bocana del RIo a aproximadmente.	TRUE	TRUE	TRUE	TRUE	TRUE	TRUE	TRUE	TRUE	TRUE	TRUE
1147	931013533	Avicennia	germinans	Avicennia germinans	-78.5553	1.74	SOUTH_AMERICA	CO		RÃ­o Rosario	TRUE	TRUE	TRUE	TRUE	TRUE	TRUE	TRUE	TRUE	TRUE	TRUE
1148	920683223	Avicennia	germinans	Avicennia germinans	-78.3066	18.3691		JM		Orange Bay Nord	TRUE	TRUE	TRUE	TRUE	TRUE	TRUE	TRUE	TRUE	TRUE	TRUE
1151	319179536	Avicennia	germinans	Avicennia germinans	-78.02	7.38	NORTH_AMERICA	PA		Along coast about halfway between JaquÃ© and Colombia	TRUE	TRUE	TRUE	TRUE	TRUE	TRUE	TRUE	TRUE	TRUE	TRUE
1152	319179608	Avicennia	germinans	Avicennia germinans	-77.93	9.13	NORTH_AMERICA	PA		Aeropuerto de Ustupu.	TRUE	TRUE	TRUE	TRUE	TRUE	TRUE	TRUE	TRUE	TRUE	TRUE
1153	319179698	Avicennia	germinans	Avicennia germinans	-77.93	9.13	NORTH_AMERICA	PA		Aeropuerto de Ustupu	TRUE	TRUE	TRUE	TRUE	TRUE	TRUE	TRUE	TRUE	TRUE	TRUE
1154	319179340	Avicennia	germinans	Avicennia germinans	-77.47	4.25	SOUTH_AMERICA	CO		RÃ­o San Juan delta, Northern mouth, between DocordÃ³ and Pacific. Mangroves, altitud near sea level.	TRUE	TRUE	TRUE	TRUE	TRUE	TRUE	TRUE	TRUE	TRUE	TRUE
1155	319179342	Avicennia	germinans	Avicennia germinans	-77.42	6.25	SOUTH_AMERICA	CO		Mangroves and adjacent beach. Mecana; Pacific coast N of BahÃ­a Solano.	TRUE	TRUE	TRUE	TRUE	TRUE	TRUE	TRUE	TRUE	TRUE	TRUE
1156	145690379	Avicennia	germinans	Avicennia germinans	-77.4167	6.25		CO		Mecana beach, pacific coast, N of Bahia Solano.	TRUE	TRUE	TRUE	TRUE	TRUE	TRUE	TRUE	TRUE	TRUE	TRUE
1157	731402577	Avicennia	germinans	Avicennia germinans	-77.4167	6.25		CO		Mecana beach, pacific coast, N of Bahia Solano.	TRUE	TRUE	TRUE	TRUE	TRUE	TRUE	TRUE	TRUE	TRUE	TRUE
1158	900164942	Avicennia	germinans	Avicennia germinans	-77.3647	6.04556	SOUTH_AMERICA	CO		Parque Nacional Natural Ensenada de UtrÃ­a	TRUE	TRUE	TRUE	TRUE	TRUE	TRUE	TRUE	TRUE	TRUE	TRUE
1159	900164975	Avicennia	germinans	Avicennia germinans	-77.3647	6.04556	SOUTH_AMERICA	CO		Parque Nacional Natural Ensenada de UtrÃ­a	TRUE	TRUE	TRUE	TRUE	TRUE	TRUE	TRUE	TRUE	TRUE	TRUE
1160	900164964	Avicennia	germinans	Avicennia germinans	-77.3647	6.04556	SOUTH_AMERICA	CO		Parque Nacional Natural Ensenada de UtrÃ­a	TRUE	TRUE	TRUE	TRUE	TRUE	TRUE	TRUE	TRUE	TRUE	TRUE
1161	900164976	Avicennia	germinans	Avicennia germinans	-77.3647	6.04556	SOUTH_AMERICA	CO		Parque Nacional Natural Ensenada de UtrÃ­a	TRUE	TRUE	TRUE	TRUE	TRUE	TRUE	TRUE	TRUE	TRUE	TRUE
1162	900164965	Avicennia	germinans	Avicennia germinans	-77.3647	6.04556	SOUTH_AMERICA	CO		Parque Nacional Natural Ensenada de UtrÃ­a	TRUE	TRUE	TRUE	TRUE	TRUE	TRUE	TRUE	TRUE	TRUE	TRUE
1163	900164998	Avicennia	germinans	Avicennia germinans	-77.3647	6.04556	SOUTH_AMERICA	CO		Parque Nacional Natural Ensenada de UtrÃ­a	TRUE	TRUE	TRUE	TRUE	TRUE	TRUE	TRUE	TRUE	TRUE	TRUE
1164	900164966	Avicennia	germinans	Avicennia germinans	-77.3647	6.04556	SOUTH_AMERICA	CO		Parque Nacional Natural Ensenada de UtrÃ­a	TRUE	TRUE	TRUE	TRUE	TRUE	TRUE	TRUE	TRUE	TRUE	TRUE
1165	900164999	Avicennia	germinans	Avicennia germinans	-77.3647	6.04556	SOUTH_AMERICA	CO		Parque Nacional Natural Ensenada de UtrÃ­a	TRUE	TRUE	TRUE	TRUE	TRUE	TRUE	TRUE	TRUE	TRUE	TRUE
1166	900165002	Avicennia	germinans	Avicennia germinans	-77.3647	6.04556	SOUTH_AMERICA	CO		Parque Nacional Natural Ensenada de UtrÃ­a	TRUE	TRUE	TRUE	TRUE	TRUE	TRUE	TRUE	TRUE	TRUE	TRUE
1167	900164962	Avicennia	germinans	Avicennia germinans	-77.3647	6.04556	SOUTH_AMERICA	CO		Parque Nacional Natural Ensenada de UtrÃ­a	TRUE	TRUE	TRUE	TRUE	TRUE	TRUE	TRUE	TRUE	TRUE	TRUE
1168	900164995	Avicennia	germinans	Avicennia germinans	-77.3647	6.04556	SOUTH_AMERICA	CO		Parque Nacional Natural Ensenada de UtrÃ­a	TRUE	TRUE	TRUE	TRUE	TRUE	TRUE	TRUE	TRUE	TRUE	TRUE
1169	900164967	Avicennia	germinans	Avicennia germinans	-77.3647	6.04556	SOUTH_AMERICA	CO		Parque Nacional Natural Ensenada de UtrÃ­a	TRUE	TRUE	TRUE	TRUE	TRUE	TRUE	TRUE	TRUE	TRUE	TRUE
1170	900164970	Avicennia	germinans	Avicennia germinans	-77.3647	6.04556	SOUTH_AMERICA	CO		Parque Nacional Natural Ensenada de UtrÃ­a	TRUE	TRUE	TRUE	TRUE	TRUE	TRUE	TRUE	TRUE	TRUE	TRUE
1171	900164953	Avicennia	germinans	Avicennia germinans	-77.3647	6.04556	SOUTH_AMERICA	CO		Parque Nacional Natural Ensenada de UtrÃ­a	TRUE	TRUE	TRUE	TRUE	TRUE	TRUE	TRUE	TRUE	TRUE	TRUE
1172	900164986	Avicennia	germinans	Avicennia germinans	-77.3647	6.04556	SOUTH_AMERICA	CO		Parque Nacional Natural Ensenada de UtrÃ­a	TRUE	TRUE	TRUE	TRUE	TRUE	TRUE	TRUE	TRUE	TRUE	TRUE
1173	900164948	Avicennia	germinans	Avicennia germinans	-77.3647	6.04556	SOUTH_AMERICA	CO		Parque Nacional Natural Ensenada de UtrÃ­a	TRUE	TRUE	TRUE	TRUE	TRUE	TRUE	TRUE	TRUE	TRUE	TRUE
1174	900164984	Avicennia	germinans	Avicennia germinans	-77.3647	6.04556	SOUTH_AMERICA	CO		Parque Nacional Natural Ensenada de UtrÃ­a	TRUE	TRUE	TRUE	TRUE	TRUE	TRUE	TRUE	TRUE	TRUE	TRUE
1175	900165020	Avicennia	germinans	Avicennia germinans	-77.3647	6.04556	SOUTH_AMERICA	CO		Parque Nacional Natural Ensenada de UtrÃ­a	TRUE	TRUE	TRUE	TRUE	TRUE	TRUE	TRUE	TRUE	TRUE	TRUE
1176	900164968	Avicennia	germinans	Avicennia germinans	-77.3647	6.04556	SOUTH_AMERICA	CO		Parque Nacional Natural Ensenada de UtrÃ­a	TRUE	TRUE	TRUE	TRUE	TRUE	TRUE	TRUE	TRUE	TRUE	TRUE
1177	900164971	Avicennia	germinans	Avicennia germinans	-77.3647	6.04556	SOUTH_AMERICA	CO		Parque Nacional Natural Ensenada de UtrÃ­a	TRUE	TRUE	TRUE	TRUE	TRUE	TRUE	TRUE	TRUE	TRUE	TRUE
1178	900164978	Avicennia	germinans	Avicennia germinans	-77.3647	6.04556	SOUTH_AMERICA	CO		Parque Nacional Natural Ensenada de UtrÃ­a	TRUE	TRUE	TRUE	TRUE	TRUE	TRUE	TRUE	TRUE	TRUE	TRUE
1179	900164981	Avicennia	germinans	Avicennia germinans	-77.3647	6.04556	SOUTH_AMERICA	CO		Parque Nacional Natural Ensenada de UtrÃ­a	TRUE	TRUE	TRUE	TRUE	TRUE	TRUE	TRUE	TRUE	TRUE	TRUE
1180	900164972	Avicennia	germinans	Avicennia germinans	-77.3647	6.04556	SOUTH_AMERICA	CO		Parque Nacional Natural Ensenada de UtrÃ­a	TRUE	TRUE	TRUE	TRUE	TRUE	TRUE	TRUE	TRUE	TRUE	TRUE
1181	900165005	Avicennia	germinans	Avicennia germinans	-77.3647	6.04556	SOUTH_AMERICA	CO		Parque Nacional Natural Ensenada de UtrÃ­a	TRUE	TRUE	TRUE	TRUE	TRUE	TRUE	TRUE	TRUE	TRUE	TRUE
1182	900164973	Avicennia	germinans	Avicennia germinans	-77.3647	6.04556	SOUTH_AMERICA	CO		Parque Nacional Natural Ensenada de UtrÃ­a	TRUE	TRUE	TRUE	TRUE	TRUE	TRUE	TRUE	TRUE	TRUE	TRUE
1183	900165006	Avicennia	germinans	Avicennia germinans	-77.3647	6.04556	SOUTH_AMERICA	CO		Parque Nacional Natural Ensenada de UtrÃ­a	TRUE	TRUE	TRUE	TRUE	TRUE	TRUE	TRUE	TRUE	TRUE	TRUE
1184	900164949	Avicennia	germinans	Avicennia germinans	-77.3647	6.04556	SOUTH_AMERICA	CO		Parque Nacional Natural Ensenada de UtrÃ­a	TRUE	TRUE	TRUE	TRUE	TRUE	TRUE	TRUE	TRUE	TRUE	TRUE
1185	900164952	Avicennia	germinans	Avicennia germinans	-77.3647	6.04556	SOUTH_AMERICA	CO		Parque Nacional Natural Ensenada de UtrÃ­a	TRUE	TRUE	TRUE	TRUE	TRUE	TRUE	TRUE	TRUE	TRUE	TRUE
1186	900164985	Avicennia	germinans	Avicennia germinans	-77.3647	6.04556	SOUTH_AMERICA	CO		Parque Nacional Natural Ensenada de UtrÃ­a	TRUE	TRUE	TRUE	TRUE	TRUE	TRUE	TRUE	TRUE	TRUE	TRUE
1187	900171813	Avicennia	germinans	Avicennia germinans	-77.3647	6.04556	SOUTH_AMERICA	CO		Parque Nacional Natural Ensenada de UtrÃ­a	TRUE	TRUE	TRUE	TRUE	TRUE	TRUE	TRUE	TRUE	TRUE	TRUE
1188	900164974	Avicennia	germinans	Avicennia germinans	-77.3647	6.04556	SOUTH_AMERICA	CO		Parque Nacional Natural Ensenada de UtrÃ­a	TRUE	TRUE	TRUE	TRUE	TRUE	TRUE	TRUE	TRUE	TRUE	TRUE
1189	900165007	Avicennia	germinans	Avicennia germinans	-77.3647	6.04556	SOUTH_AMERICA	CO		Parque Nacional Natural Ensenada de UtrÃ­a	TRUE	TRUE	TRUE	TRUE	TRUE	TRUE	TRUE	TRUE	TRUE	TRUE
1190	900165010	Avicennia	germinans	Avicennia germinans	-77.3647	6.04556	SOUTH_AMERICA	CO		Parque Nacional Natural Ensenada de UtrÃ­a	TRUE	TRUE	TRUE	TRUE	TRUE	TRUE	TRUE	TRUE	TRUE	TRUE
1191	900164979	Avicennia	germinans	Avicennia germinans	-77.3647	6.04556	SOUTH_AMERICA	CO		Parque Nacional Natural Ensenada de UtrÃ­a	TRUE	TRUE	TRUE	TRUE	TRUE	TRUE	TRUE	TRUE	TRUE	TRUE
1192	900164982	Avicennia	germinans	Avicennia germinans	-77.3647	6.04556	SOUTH_AMERICA	CO		Parque Nacional Natural Ensenada de UtrÃ­a	TRUE	TRUE	TRUE	TRUE	TRUE	TRUE	TRUE	TRUE	TRUE	TRUE
1193	900164977	Avicennia	germinans	Avicennia germinans	-77.3647	6.04556	SOUTH_AMERICA	CO		Parque Nacional Natural Ensenada de UtrÃ­a	TRUE	TRUE	TRUE	TRUE	TRUE	TRUE	TRUE	TRUE	TRUE	TRUE
1194	900164980	Avicennia	germinans	Avicennia germinans	-77.3647	6.04556	SOUTH_AMERICA	CO		Parque Nacional Natural Ensenada de UtrÃ­a	TRUE	TRUE	TRUE	TRUE	TRUE	TRUE	TRUE	TRUE	TRUE	TRUE
1195	900164988	Avicennia	germinans	Avicennia germinans	-77.3647	6.04556	SOUTH_AMERICA	CO		Parque Nacional Natural Ensenada de UtrÃ­a	TRUE	TRUE	TRUE	TRUE	TRUE	TRUE	TRUE	TRUE	TRUE	TRUE
1196	900164991	Avicennia	germinans	Avicennia germinans	-77.3647	6.04556	SOUTH_AMERICA	CO		Parque Nacional Natural Ensenada de UtrÃ­a	TRUE	TRUE	TRUE	TRUE	TRUE	TRUE	TRUE	TRUE	TRUE	TRUE
1197	900164987	Avicennia	germinans	Avicennia germinans	-77.3647	6.04556	SOUTH_AMERICA	CO		Parque Nacional Natural Ensenada de UtrÃ­a	TRUE	TRUE	TRUE	TRUE	TRUE	TRUE	TRUE	TRUE	TRUE	TRUE
1198	900164954	Avicennia	germinans	Avicennia germinans	-77.3647	6.04556	SOUTH_AMERICA	CO		Parque Nacional Natural Ensenada de UtrÃ­a	TRUE	TRUE	TRUE	TRUE	TRUE	TRUE	TRUE	TRUE	TRUE	TRUE
1199	900164983	Avicennia	germinans	Avicennia germinans	-77.3647	6.04556	SOUTH_AMERICA	CO		Parque Nacional Natural Ensenada de UtrÃ­a	TRUE	TRUE	TRUE	TRUE	TRUE	TRUE	TRUE	TRUE	TRUE	TRUE
1200	900164956	Avicennia	germinans	Avicennia germinans	-77.3647	6.04556	SOUTH_AMERICA	CO		Parque Nacional Natural Ensenada de UtrÃ­a	TRUE	TRUE	TRUE	TRUE	TRUE	TRUE	TRUE	TRUE	TRUE	TRUE
1201	900164989	Avicennia	germinans	Avicennia germinans	-77.3647	6.04556	SOUTH_AMERICA	CO		Parque Nacional Natural Ensenada de UtrÃ­a	TRUE	TRUE	TRUE	TRUE	TRUE	TRUE	TRUE	TRUE	TRUE	TRUE
1202	900164992	Avicennia	germinans	Avicennia germinans	-77.3647	6.04556	SOUTH_AMERICA	CO		Parque Nacional Natural Ensenada de UtrÃ­a	TRUE	TRUE	TRUE	TRUE	TRUE	TRUE	TRUE	TRUE	TRUE	TRUE
1203	900164961	Avicennia	germinans	Avicennia germinans	-77.3647	6.04556	SOUTH_AMERICA	CO		Parque Nacional Natural Ensenada de UtrÃ­a	TRUE	TRUE	TRUE	TRUE	TRUE	TRUE	TRUE	TRUE	TRUE	TRUE
1204	900164994	Avicennia	germinans	Avicennia germinans	-77.3647	6.04556	SOUTH_AMERICA	CO		Parque Nacional Natural Ensenada de UtrÃ­a	TRUE	TRUE	TRUE	TRUE	TRUE	TRUE	TRUE	TRUE	TRUE	TRUE
1205	900164957	Avicennia	germinans	Avicennia germinans	-77.3647	6.04556	SOUTH_AMERICA	CO		Parque Nacional Natural Ensenada de UtrÃ­a	TRUE	TRUE	TRUE	TRUE	TRUE	TRUE	TRUE	TRUE	TRUE	TRUE
1206	900164960	Avicennia	germinans	Avicennia germinans	-77.3647	6.04556	SOUTH_AMERICA	CO		Parque Nacional Natural Ensenada de UtrÃ­a	TRUE	TRUE	TRUE	TRUE	TRUE	TRUE	TRUE	TRUE	TRUE	TRUE
1207	900164993	Avicennia	germinans	Avicennia germinans	-77.3647	6.04556	SOUTH_AMERICA	CO		Parque Nacional Natural Ensenada de UtrÃ­a	TRUE	TRUE	TRUE	TRUE	TRUE	TRUE	TRUE	TRUE	TRUE	TRUE
1208	900164963	Avicennia	germinans	Avicennia germinans	-77.3647	6.04556	SOUTH_AMERICA	CO		Parque Nacional Natural Ensenada de UtrÃ­a	TRUE	TRUE	TRUE	TRUE	TRUE	TRUE	TRUE	TRUE	TRUE	TRUE
1209	900164996	Avicennia	germinans	Avicennia germinans	-77.3647	6.04556	SOUTH_AMERICA	CO		Parque Nacional Natural Ensenada de UtrÃ­a	TRUE	TRUE	TRUE	TRUE	TRUE	TRUE	TRUE	TRUE	TRUE	TRUE
1210	930994925	Avicennia	germinans	Avicennia germinans	-77.35	6.01667	SOUTH_AMERICA	CO		Corregimiento El Valle, manglar en las inmediaciones de las cabaÃ±as del parque	TRUE	TRUE	TRUE	TRUE	TRUE	TRUE	TRUE	TRUE	TRUE	TRUE
1211	416338299	Avicennia	germinans	Avicennia germinans	-77.335	6.40639		CO		SI.	TRUE	TRUE	TRUE	TRUE	TRUE	TRUE	TRUE	TRUE	TRUE	TRUE
1212	731402560	Avicennia	germinans	Avicennia germinans	-77.335	6.40639		CO		SI.	TRUE	TRUE	TRUE	TRUE	TRUE	TRUE	TRUE	TRUE	TRUE	TRUE
1216	319179385	Avicennia	germinans	Avicennia germinans	-77.28	5.32	SOUTH_AMERICA	CO		Nuqui-Pangui, RÃ­o Chicui, bmh-T.	TRUE	TRUE	TRUE	TRUE	TRUE	TRUE	TRUE	TRUE	TRUE	TRUE
1218	319179337	Avicennia	germinans	Avicennia germinans	-77.13	20.33	NORTH_AMERICA	CU	Granma	GRANMA: Mangrove area just S of Manzanillo.	TRUE	TRUE	TRUE	TRUE	TRUE	TRUE	TRUE	TRUE	TRUE	TRUE
1220	931012891	Avicennia	germinans	Avicennia germinans	-76.7667	8.3	SOUTH_AMERICA	CO		CaserÃ­o El Totumo	TRUE	TRUE	TRUE	TRUE	TRUE	TRUE	TRUE	TRUE	TRUE	TRUE
1221	319179457	Avicennia	germinans	Avicennia germinans	-76.73	8.1	SOUTH_AMERICA	CO		Between Turbo and Punta La Vaca.	TRUE	TRUE	TRUE	TRUE	TRUE	TRUE	TRUE	TRUE	TRUE	TRUE
1222	215137010	Avicennia	germinans	Avicennia germinans	-76.4316	6.3551		CO			TRUE	TRUE	TRUE	TRUE	TRUE	TRUE	TRUE	TRUE	TRUE	TRUE
1223	319179310	Avicennia	germinans	Avicennia germinans	-76.43	6.35	SOUTH_AMERICA	CO		Parque Nacional Natural de Utria, riberas del RÃ­o San PichÃ­.	TRUE	TRUE	TRUE	TRUE	TRUE	TRUE	TRUE	TRUE	TRUE	TRUE
1224	319179309	Avicennia	germinans	Avicennia germinans	-76.43	6.35	SOUTH_AMERICA	CO		Parque Nacional Natural Ensenada de Utria, orilla de la playa entre caida Cocalito y la trocha al Valle.	TRUE	TRUE	TRUE	TRUE	TRUE	TRUE	TRUE	TRUE	TRUE	TRUE
1225	319179371	Avicennia	germinans	Avicennia germinans	-76.43	6.35	SOUTH_AMERICA	CO		Corregimiento El Valle, camino del Valle al Almejal.	TRUE	TRUE	TRUE	TRUE	TRUE	TRUE	TRUE	TRUE	TRUE	TRUE
1226	931013733	Avicennia	germinans	Avicennia germinans	-76.3333	8.66667	SOUTH_AMERICA	CO		1 km N en la vÃ­a a Arboletes	TRUE	TRUE	TRUE	TRUE	TRUE	TRUE	TRUE	TRUE	TRUE	TRUE
1227	931013715	Avicennia	germinans	Avicennia germinans	-76.3333	8.66667	SOUTH_AMERICA	CO		1 km N en la vÃ­a a Arboletes	TRUE	TRUE	TRUE	TRUE	TRUE	TRUE	TRUE	TRUE	TRUE	TRUE
1228	1086984074	Avicennia	germinans	Avicennia germinans	-76.2176	8.94066	SOUTH_AMERICA	CO		Arroyo Aguas Vivas, colecciones en bosque aledaÃ±o al arroyo	TRUE	TRUE	TRUE	TRUE	TRUE	TRUE	TRUE	TRUE	TRUE	TRUE
1229	415960214	Avicennia	germinans	Avicennia germinans	-75.8525	23.5581		BS		Hummingbird Cay	TRUE	TRUE	TRUE	TRUE	TRUE	TRUE	TRUE	TRUE	TRUE	TRUE
1230	900164807	Avicennia	germinans	Avicennia germinans	-75.8425	9.36361	SOUTH_AMERICA	CO		BahÃ­a de Cispata	TRUE	TRUE	TRUE	TRUE	TRUE	TRUE	TRUE	TRUE	TRUE	TRUE
1231	900164810	Avicennia	germinans	Avicennia germinans	-75.8425	9.36361	SOUTH_AMERICA	CO		BahÃ­a de Cispata	TRUE	TRUE	TRUE	TRUE	TRUE	TRUE	TRUE	TRUE	TRUE	TRUE
1232	900164843	Avicennia	germinans	Avicennia germinans	-75.8425	9.36361	SOUTH_AMERICA	CO		BahÃ­a de Cispata	TRUE	TRUE	TRUE	TRUE	TRUE	TRUE	TRUE	TRUE	TRUE	TRUE
1233	900164829	Avicennia	germinans	Avicennia germinans	-75.8425	9.36361	SOUTH_AMERICA	CO		BahÃ­a de Cispata	TRUE	TRUE	TRUE	TRUE	TRUE	TRUE	TRUE	TRUE	TRUE	TRUE
1234	900164865	Avicennia	germinans	Avicennia germinans	-75.8425	9.36361	SOUTH_AMERICA	CO		BahÃ­a de Cispata	TRUE	TRUE	TRUE	TRUE	TRUE	TRUE	TRUE	TRUE	TRUE	TRUE
1235	900164844	Avicennia	germinans	Avicennia germinans	-75.8425	9.36361	SOUTH_AMERICA	CO		BahÃ­a de Cispata	TRUE	TRUE	TRUE	TRUE	TRUE	TRUE	TRUE	TRUE	TRUE	TRUE
1236	900164833	Avicennia	germinans	Avicennia germinans	-75.8425	9.36361	SOUTH_AMERICA	CO		BahÃ­a de Cispata	TRUE	TRUE	TRUE	TRUE	TRUE	TRUE	TRUE	TRUE	TRUE	TRUE
1237	900164834	Avicennia	germinans	Avicennia germinans	-75.8425	9.36361	SOUTH_AMERICA	CO		BahÃ­a de Cispata	TRUE	TRUE	TRUE	TRUE	TRUE	TRUE	TRUE	TRUE	TRUE	TRUE
1238	900164867	Avicennia	germinans	Avicennia germinans	-75.8425	9.36361	SOUTH_AMERICA	CO		BahÃ­a de Cispata	TRUE	TRUE	TRUE	TRUE	TRUE	TRUE	TRUE	TRUE	TRUE	TRUE
1239	900164870	Avicennia	germinans	Avicennia germinans	-75.8425	9.36361	SOUTH_AMERICA	CO		BahÃ­a de Cispata	TRUE	TRUE	TRUE	TRUE	TRUE	TRUE	TRUE	TRUE	TRUE	TRUE
1240	900164500	Avicennia	germinans	Avicennia germinans	-75.8425	9.36361	SOUTH_AMERICA	CO		BahÃ­a de Cispata	TRUE	TRUE	TRUE	TRUE	TRUE	TRUE	TRUE	TRUE	TRUE	TRUE
1241	900164827	Avicennia	germinans	Avicennia germinans	-75.8425	9.36361	SOUTH_AMERICA	CO		BahÃ­a de Cispata	TRUE	TRUE	TRUE	TRUE	TRUE	TRUE	TRUE	TRUE	TRUE	TRUE
1242	900164830	Avicennia	germinans	Avicennia germinans	-75.8425	9.36361	SOUTH_AMERICA	CO		BahÃ­a de Cispata	TRUE	TRUE	TRUE	TRUE	TRUE	TRUE	TRUE	TRUE	TRUE	TRUE
1243	900164835	Avicennia	germinans	Avicennia germinans	-75.8425	9.36361	SOUTH_AMERICA	CO		BahÃ­a de Cispata	TRUE	TRUE	TRUE	TRUE	TRUE	TRUE	TRUE	TRUE	TRUE	TRUE
1244	900164868	Avicennia	germinans	Avicennia germinans	-75.8425	9.36361	SOUTH_AMERICA	CO		BahÃ­a de Cispata	TRUE	TRUE	TRUE	TRUE	TRUE	TRUE	TRUE	TRUE	TRUE	TRUE
1245	900164791	Avicennia	germinans	Avicennia germinans	-75.8425	9.36361	SOUTH_AMERICA	CO		BahÃ­a de Cispata	TRUE	TRUE	TRUE	TRUE	TRUE	TRUE	TRUE	TRUE	TRUE	TRUE
1246	900164854	Avicennia	germinans	Avicennia germinans	-75.8425	9.36361	SOUTH_AMERICA	CO		BahÃ­a de Cispata	TRUE	TRUE	TRUE	TRUE	TRUE	TRUE	TRUE	TRUE	TRUE	TRUE
1247	900164849	Avicennia	germinans	Avicennia germinans	-75.8425	9.36361	SOUTH_AMERICA	CO		BahÃ­a de Cispata	TRUE	TRUE	TRUE	TRUE	TRUE	TRUE	TRUE	TRUE	TRUE	TRUE
1248	900171779	Avicennia	germinans	Avicennia germinans	-75.8425	9.36361	SOUTH_AMERICA	CO		BahÃ­a de Cispata	TRUE	TRUE	TRUE	TRUE	TRUE	TRUE	TRUE	TRUE	TRUE	TRUE
1249	900164836	Avicennia	germinans	Avicennia germinans	-75.8425	9.36361	SOUTH_AMERICA	CO		BahÃ­a de Cispata	TRUE	TRUE	TRUE	TRUE	TRUE	TRUE	TRUE	TRUE	TRUE	TRUE
1250	900164869	Avicennia	germinans	Avicennia germinans	-75.8425	9.36361	SOUTH_AMERICA	CO		BahÃ­a de Cispata	TRUE	TRUE	TRUE	TRUE	TRUE	TRUE	TRUE	TRUE	TRUE	TRUE
1251	900164813	Avicennia	germinans	Avicennia germinans	-75.8425	9.36361	SOUTH_AMERICA	CO		BahÃ­a de Cispata	TRUE	TRUE	TRUE	TRUE	TRUE	TRUE	TRUE	TRUE	TRUE	TRUE
1252	900164846	Avicennia	germinans	Avicennia germinans	-75.8425	9.36361	SOUTH_AMERICA	CO		BahÃ­a de Cispata	TRUE	TRUE	TRUE	TRUE	TRUE	TRUE	TRUE	TRUE	TRUE	TRUE
1253	900164804	Avicennia	germinans	Avicennia germinans	-75.8425	9.36361	SOUTH_AMERICA	CO		BahÃ­a de Cispata	TRUE	TRUE	TRUE	TRUE	TRUE	TRUE	TRUE	TRUE	TRUE	TRUE
1254	900164837	Avicennia	germinans	Avicennia germinans	-75.8425	9.36361	SOUTH_AMERICA	CO		BahÃ­a de Cispata	TRUE	TRUE	TRUE	TRUE	TRUE	TRUE	TRUE	TRUE	TRUE	TRUE
1255	900164840	Avicennia	germinans	Avicennia germinans	-75.8425	9.36361	SOUTH_AMERICA	CO		BahÃ­a de Cispata	TRUE	TRUE	TRUE	TRUE	TRUE	TRUE	TRUE	TRUE	TRUE	TRUE
1256	900164838	Avicennia	germinans	Avicennia germinans	-75.8425	9.36361	SOUTH_AMERICA	CO		BahÃ­a de Cispata	TRUE	TRUE	TRUE	TRUE	TRUE	TRUE	TRUE	TRUE	TRUE	TRUE
1257	900164841	Avicennia	germinans	Avicennia germinans	-75.8425	9.36361	SOUTH_AMERICA	CO		BahÃ­a de Cispata	TRUE	TRUE	TRUE	TRUE	TRUE	TRUE	TRUE	TRUE	TRUE	TRUE
1258	900164874	Avicennia	germinans	Avicennia germinans	-75.8425	9.36361	SOUTH_AMERICA	CO		BahÃ­a de Cispata	TRUE	TRUE	TRUE	TRUE	TRUE	TRUE	TRUE	TRUE	TRUE	TRUE
1259	900164817	Avicennia	germinans	Avicennia germinans	-75.8425	9.36361	SOUTH_AMERICA	CO		BahÃ­a de Cispata	TRUE	TRUE	TRUE	TRUE	TRUE	TRUE	TRUE	TRUE	TRUE	TRUE
1260	900164853	Avicennia	germinans	Avicennia germinans	-75.8425	9.36361	SOUTH_AMERICA	CO		BahÃ­a de Cispata	TRUE	TRUE	TRUE	TRUE	TRUE	TRUE	TRUE	TRUE	TRUE	TRUE
1261	900164806	Avicennia	germinans	Avicennia germinans	-75.8425	9.36361	SOUTH_AMERICA	CO		BahÃ­a de Cispata	TRUE	TRUE	TRUE	TRUE	TRUE	TRUE	TRUE	TRUE	TRUE	TRUE
1262	900164839	Avicennia	germinans	Avicennia germinans	-75.8425	9.36361	SOUTH_AMERICA	CO		BahÃ­a de Cispata	TRUE	TRUE	TRUE	TRUE	TRUE	TRUE	TRUE	TRUE	TRUE	TRUE
1263	900164842	Avicennia	germinans	Avicennia germinans	-75.8425	9.36361	SOUTH_AMERICA	CO		BahÃ­a de Cispata	TRUE	TRUE	TRUE	TRUE	TRUE	TRUE	TRUE	TRUE	TRUE	TRUE
1264	900164487	Avicennia	germinans	Avicennia germinans	-75.8425	9.36361	SOUTH_AMERICA	CO		BahÃ­a de Cispata	TRUE	TRUE	TRUE	TRUE	TRUE	TRUE	TRUE	TRUE	TRUE	TRUE
1265	900164814	Avicennia	germinans	Avicennia germinans	-75.8425	9.36361	SOUTH_AMERICA	CO		BahÃ­a de Cispata	TRUE	TRUE	TRUE	TRUE	TRUE	TRUE	TRUE	TRUE	TRUE	TRUE
1266	900164847	Avicennia	germinans	Avicennia germinans	-75.8425	9.36361	SOUTH_AMERICA	CO		BahÃ­a de Cispata	TRUE	TRUE	TRUE	TRUE	TRUE	TRUE	TRUE	TRUE	TRUE	TRUE
1267	900164850	Avicennia	germinans	Avicennia germinans	-75.8425	9.36361	SOUTH_AMERICA	CO		BahÃ­a de Cispata	TRUE	TRUE	TRUE	TRUE	TRUE	TRUE	TRUE	TRUE	TRUE	TRUE
1268	900164812	Avicennia	germinans	Avicennia germinans	-75.8425	9.36361	SOUTH_AMERICA	CO		BahÃ­a de Cispata	TRUE	TRUE	TRUE	TRUE	TRUE	TRUE	TRUE	TRUE	TRUE	TRUE
1269	900164845	Avicennia	germinans	Avicennia germinans	-75.8425	9.36361	SOUTH_AMERICA	CO		BahÃ­a de Cispata	TRUE	TRUE	TRUE	TRUE	TRUE	TRUE	TRUE	TRUE	TRUE	TRUE
1270	900164878	Avicennia	germinans	Avicennia germinans	-75.8425	9.36361	SOUTH_AMERICA	CO		BahÃ­a de Cispata	TRUE	TRUE	TRUE	TRUE	TRUE	TRUE	TRUE	TRUE	TRUE	TRUE
1271	900164823	Avicennia	germinans	Avicennia germinans	-75.8425	9.36361	SOUTH_AMERICA	CO		BahÃ­a de Cispata	TRUE	TRUE	TRUE	TRUE	TRUE	TRUE	TRUE	TRUE	TRUE	TRUE
1272	900164856	Avicennia	germinans	Avicennia germinans	-75.8425	9.36361	SOUTH_AMERICA	CO		BahÃ­a de Cispata	TRUE	TRUE	TRUE	TRUE	TRUE	TRUE	TRUE	TRUE	TRUE	TRUE
1273	900164822	Avicennia	germinans	Avicennia germinans	-75.8425	9.36361	SOUTH_AMERICA	CO		BahÃ­a de Cispata	TRUE	TRUE	TRUE	TRUE	TRUE	TRUE	TRUE	TRUE	TRUE	TRUE
1274	900164848	Avicennia	germinans	Avicennia germinans	-75.8425	9.36361	SOUTH_AMERICA	CO		BahÃ­a de Cispata	TRUE	TRUE	TRUE	TRUE	TRUE	TRUE	TRUE	TRUE	TRUE	TRUE
1275	900164851	Avicennia	germinans	Avicennia germinans	-75.8425	9.36361	SOUTH_AMERICA	CO		BahÃ­a de Cispata	TRUE	TRUE	TRUE	TRUE	TRUE	TRUE	TRUE	TRUE	TRUE	TRUE
1276	900171778	Avicennia	germinans	Avicennia germinans	-75.8425	9.36361	SOUTH_AMERICA	CO		BahÃ­a de Cispata	TRUE	TRUE	TRUE	TRUE	TRUE	TRUE	TRUE	TRUE	TRUE	TRUE
1277	900164857	Avicennia	germinans	Avicennia germinans	-75.8425	9.36361	SOUTH_AMERICA	CO		BahÃ­a de Cispata	TRUE	TRUE	TRUE	TRUE	TRUE	TRUE	TRUE	TRUE	TRUE	TRUE
1278	900164825	Avicennia	germinans	Avicennia germinans	-75.8425	9.36361	SOUTH_AMERICA	CO		BahÃ­a de Cispata	TRUE	TRUE	TRUE	TRUE	TRUE	TRUE	TRUE	TRUE	TRUE	TRUE
1279	900164828	Avicennia	germinans	Avicennia germinans	-75.8425	9.36361	SOUTH_AMERICA	CO		BahÃ­a de Cispata	TRUE	TRUE	TRUE	TRUE	TRUE	TRUE	TRUE	TRUE	TRUE	TRUE
1280	900164831	Avicennia	germinans	Avicennia germinans	-75.8425	9.36361	SOUTH_AMERICA	CO		BahÃ­a de Cispata	TRUE	TRUE	TRUE	TRUE	TRUE	TRUE	TRUE	TRUE	TRUE	TRUE
1283	930986065	Avicennia	germinans	Avicennia germinans	-75.5106	10.3569	SOUTH_AMERICA	CO		Termocartagena	TRUE	TRUE	TRUE	TRUE	TRUE	TRUE	TRUE	TRUE	TRUE	TRUE
1284	930996416	Avicennia	germinans	Avicennia germinans	-75.5069	10.3365	SOUTH_AMERICA	CO		Zona industrial de Mamonal, km 8 de la vÃ­a Mamonal-Pasacaballos, zona litoral	TRUE	TRUE	TRUE	TRUE	TRUE	TRUE	TRUE	TRUE	TRUE	TRUE
1285	319180017	Avicennia	germinans	Avicennia germinans	-75.27	10.13	SOUTH_AMERICA	CO		Pueblo Nuevo, alrededores de la CiÃ©naga el Totumo, camino al volcÃ¡n de lobo.	TRUE	TRUE	TRUE	TRUE	TRUE	TRUE	TRUE	TRUE	TRUE	TRUE
1286	931010149	Avicennia	germinans	Avicennia germinans	-75.2692	10.1455	SOUTH_AMERICA	CO		Camino al volcÃ¡n de lodo	TRUE	TRUE	TRUE	TRUE	TRUE	TRUE	TRUE	TRUE	TRUE	TRUE
1287	319179341	Avicennia	germinans	Avicennia germinans	-75.25	10.75	SOUTH_AMERICA	CO		VolcÃ¡n de Lodo, Santa Catalina-Galerazamba road, N tip of Bolivar. Altitud near sea level. Dry scrubby forest.	TRUE	TRUE	TRUE	TRUE	TRUE	TRUE	TRUE	TRUE	TRUE	TRUE
1288	319179991	Avicennia	germinans	Avicennia germinans	-75.1	9.07	SOUTH_AMERICA	CO		Arroyo Palo Blanca, 7.5 km TolÃº-CoveÃ±as, Litoral Caribe, Golfo de Morrosquillo,	TRUE	TRUE	TRUE	TRUE	TRUE	TRUE	TRUE	TRUE	TRUE	TRUE
1289	319179990	Avicennia	germinans	Avicennia germinans	-75.1	9.07	SOUTH_AMERICA	CO		Arroyo Villero, 20.5 km TolÃº: Arroyo Villero, 20.5 km TolÃº-CoveÃ±as, Litoral Caribe, Golfo de Morrosquillo,	TRUE	TRUE	TRUE	TRUE	TRUE	TRUE	TRUE	TRUE	TRUE	TRUE
1290	931014204	Avicennia	germinans	Avicennia germinans	-75	9.4	SOUTH_AMERICA	CO		Arroyo Palo Blanco	TRUE	TRUE	TRUE	TRUE	TRUE	TRUE	TRUE	TRUE	TRUE	TRUE
1291	931014184	Avicennia	germinans	Avicennia germinans	-75	9.4	SOUTH_AMERICA	CO		Arroyo Villadero golfo de Morrosquillo	TRUE	TRUE	TRUE	TRUE	TRUE	TRUE	TRUE	TRUE	TRUE	TRUE
1292	900164876	Avicennia	germinans	Avicennia germinans	-74.6842	11.0097	SOUTH_AMERICA	CO		ciÃ©naga Grande de Santa Marta Salamanca Reforestado Palermo	TRUE	TRUE	TRUE	TRUE	TRUE	TRUE	TRUE	TRUE	TRUE	TRUE
1293	900164832	Avicennia	germinans	Avicennia germinans	-74.6842	11.0097	SOUTH_AMERICA	CO		ciÃ©naga Grande de Santa Marta Salamanca Reforestado Retramar	TRUE	TRUE	TRUE	TRUE	TRUE	TRUE	TRUE	TRUE	TRUE	TRUE
1294	900164898	Avicennia	germinans	Avicennia germinans	-74.6842	11.0097	SOUTH_AMERICA	CO		ciÃ©naga Grande de Santa Marta Salamanca Reforestado Palermo	TRUE	TRUE	TRUE	TRUE	TRUE	TRUE	TRUE	TRUE	TRUE	TRUE
1295	900164877	Avicennia	germinans	Avicennia germinans	-74.6842	11.0097	SOUTH_AMERICA	CO		ciÃ©naga Grande de Santa Marta Salamanca Reforestado Palermo	TRUE	TRUE	TRUE	TRUE	TRUE	TRUE	TRUE	TRUE	TRUE	TRUE
1296	900164880	Avicennia	germinans	Avicennia germinans	-74.6842	11.0097	SOUTH_AMERICA	CO		ciÃ©naga Grande de Santa Marta Salamanca Reforestado Palermo	TRUE	TRUE	TRUE	TRUE	TRUE	TRUE	TRUE	TRUE	TRUE	TRUE
1297	900164907	Avicennia	germinans	Avicennia germinans	-74.6842	11.0097	SOUTH_AMERICA	CO		ciÃ©naga Grande de Santa Marta Natural-la raya	TRUE	TRUE	TRUE	TRUE	TRUE	TRUE	TRUE	TRUE	TRUE	TRUE
1298	900164910	Avicennia	germinans	Avicennia germinans	-74.6842	11.0097	SOUTH_AMERICA	CO		ciÃ©naga Grande de Santa Marta Natural-la raya	TRUE	TRUE	TRUE	TRUE	TRUE	TRUE	TRUE	TRUE	TRUE	TRUE
1299	900164866	Avicennia	germinans	Avicennia germinans	-74.6842	11.0097	SOUTH_AMERICA	CO		ciÃ©naga Grande de Santa Marta Salamanca Reforestado Retramar	TRUE	TRUE	TRUE	TRUE	TRUE	TRUE	TRUE	TRUE	TRUE	TRUE
1300	900164899	Avicennia	germinans	Avicennia germinans	-74.6842	11.0097	SOUTH_AMERICA	CO		ciÃ©naga Grande de Santa Marta Natural-la raya	TRUE	TRUE	TRUE	TRUE	TRUE	TRUE	TRUE	TRUE	TRUE	TRUE
1301	900164900	Avicennia	germinans	Avicennia germinans	-74.6842	11.0097	SOUTH_AMERICA	CO		ciÃ©naga Grande de Santa Marta Natural-la raya	TRUE	TRUE	TRUE	TRUE	TRUE	TRUE	TRUE	TRUE	TRUE	TRUE
1302	900164863	Avicennia	germinans	Avicennia germinans	-74.6842	11.0097	SOUTH_AMERICA	CO		ciÃ©naga Grande de Santa Marta Salamanca Reforestado Retramar	TRUE	TRUE	TRUE	TRUE	TRUE	TRUE	TRUE	TRUE	TRUE	TRUE
1303	900164896	Avicennia	germinans	Avicennia germinans	-74.6842	11.0097	SOUTH_AMERICA	CO		ciÃ©naga Grande de Santa Marta Salamanca Reforestado Palermo	TRUE	TRUE	TRUE	TRUE	TRUE	TRUE	TRUE	TRUE	TRUE	TRUE
1304	900164871	Avicennia	germinans	Avicennia germinans	-74.6842	11.0097	SOUTH_AMERICA	CO		ciÃ©naga Grande de Santa Marta Salamanca Reforestado Retramar	TRUE	TRUE	TRUE	TRUE	TRUE	TRUE	TRUE	TRUE	TRUE	TRUE
1305	900164901	Avicennia	germinans	Avicennia germinans	-74.6842	11.0097	SOUTH_AMERICA	CO		ciÃ©naga Grande de Santa Marta Natural-la raya	TRUE	TRUE	TRUE	TRUE	TRUE	TRUE	TRUE	TRUE	TRUE	TRUE
1306	900164887	Avicennia	germinans	Avicennia germinans	-74.6842	11.0097	SOUTH_AMERICA	CO		ciÃ©naga Grande de Santa Marta Natural-la raya	TRUE	TRUE	TRUE	TRUE	TRUE	TRUE	TRUE	TRUE	TRUE	TRUE
1307	900164890	Avicennia	germinans	Avicennia germinans	-74.6842	11.0097	SOUTH_AMERICA	CO		ciÃ©naga Grande de Santa Marta Natural-la raya	TRUE	TRUE	TRUE	TRUE	TRUE	TRUE	TRUE	TRUE	TRUE	TRUE
1308	900164920	Avicennia	germinans	Avicennia germinans	-74.6842	11.0097	SOUTH_AMERICA	CO		ciÃ©naga Grande de Santa Marta Natural-la raya	TRUE	TRUE	TRUE	TRUE	TRUE	TRUE	TRUE	TRUE	TRUE	TRUE
1309	900164852	Avicennia	germinans	Avicennia germinans	-74.6842	11.0097	SOUTH_AMERICA	CO		ciÃ©naga Grande de Santa Marta Salamanca Reforestado Retramar	TRUE	TRUE	TRUE	TRUE	TRUE	TRUE	TRUE	TRUE	TRUE	TRUE
1310	900164885	Avicennia	germinans	Avicennia germinans	-74.6842	11.0097	SOUTH_AMERICA	CO		ciÃ©naga Grande de Santa Marta Natural-la raya	TRUE	TRUE	TRUE	TRUE	TRUE	TRUE	TRUE	TRUE	TRUE	TRUE
1311	900164915	Avicennia	germinans	Avicennia germinans	-74.6842	11.0097	SOUTH_AMERICA	CO		ciÃ©naga Grande de Santa Marta Natural-la raya	TRUE	TRUE	TRUE	TRUE	TRUE	TRUE	TRUE	TRUE	TRUE	TRUE
1312	900164872	Avicennia	germinans	Avicennia germinans	-74.6842	11.0097	SOUTH_AMERICA	CO		ciÃ©naga Grande de Santa Marta Salamanca Reforestado Retramar	TRUE	TRUE	TRUE	TRUE	TRUE	TRUE	TRUE	TRUE	TRUE	TRUE
1313	900164879	Avicennia	germinans	Avicennia germinans	-74.6842	11.0097	SOUTH_AMERICA	CO		ciÃ©naga Grande de Santa Marta Salamanca Reforestado Palermo	TRUE	TRUE	TRUE	TRUE	TRUE	TRUE	TRUE	TRUE	TRUE	TRUE
1314	900164882	Avicennia	germinans	Avicennia germinans	-74.6842	11.0097	SOUTH_AMERICA	CO		ciÃ©naga Grande de Santa Marta Salamanca Reforestado Retramar	TRUE	TRUE	TRUE	TRUE	TRUE	TRUE	TRUE	TRUE	TRUE	TRUE
1315	900164873	Avicennia	germinans	Avicennia germinans	-74.6842	11.0097	SOUTH_AMERICA	CO		ciÃ©naga Grande de Santa Marta Salamanca Reforestado Retramar	TRUE	TRUE	TRUE	TRUE	TRUE	TRUE	TRUE	TRUE	TRUE	TRUE
1316	900164903	Avicennia	germinans	Avicennia germinans	-74.6842	11.0097	SOUTH_AMERICA	CO		ciÃ©naga Grande de Santa Marta Salamanca Reforestado Palermo	TRUE	TRUE	TRUE	TRUE	TRUE	TRUE	TRUE	TRUE	TRUE	TRUE
1317	900164904	Avicennia	germinans	Avicennia germinans	-74.6842	11.0097	SOUTH_AMERICA	CO		ciÃ©naga Grande de Santa Marta Natural-la raya	TRUE	TRUE	TRUE	TRUE	TRUE	TRUE	TRUE	TRUE	TRUE	TRUE
1318	900164875	Avicennia	germinans	Avicennia germinans	-74.6842	11.0097	SOUTH_AMERICA	CO		ciÃ©naga Grande de Santa Marta Salamanca Reforestado Palermo	TRUE	TRUE	TRUE	TRUE	TRUE	TRUE	TRUE	TRUE	TRUE	TRUE
1319	900164905	Avicennia	germinans	Avicennia germinans	-74.6842	11.0097	SOUTH_AMERICA	CO		ciÃ©naga Grande de Santa Marta Natural-la raya	TRUE	TRUE	TRUE	TRUE	TRUE	TRUE	TRUE	TRUE	TRUE	TRUE
1320	900164883	Avicennia	germinans	Avicennia germinans	-74.6842	11.0097	SOUTH_AMERICA	CO		ciÃ©naga Grande de Santa Marta Natural-la raya	TRUE	TRUE	TRUE	TRUE	TRUE	TRUE	TRUE	TRUE	TRUE	TRUE
1321	900164881	Avicennia	germinans	Avicennia germinans	-74.6842	11.0097	SOUTH_AMERICA	CO		ciÃ©naga Grande de Santa Marta Salamanca Reforestado Palermo	TRUE	TRUE	TRUE	TRUE	TRUE	TRUE	TRUE	TRUE	TRUE	TRUE
1322	900164889	Avicennia	germinans	Avicennia germinans	-74.6842	11.0097	SOUTH_AMERICA	CO		ciÃ©naga Grande de Santa Marta Salamanca Reforestado Retramar	TRUE	TRUE	TRUE	TRUE	TRUE	TRUE	TRUE	TRUE	TRUE	TRUE
1323	900164892	Avicennia	germinans	Avicennia germinans	-74.6842	11.0097	SOUTH_AMERICA	CO		ciÃ©naga Grande de Santa Marta Salamanca Reforestado Palermo	TRUE	TRUE	TRUE	TRUE	TRUE	TRUE	TRUE	TRUE	TRUE	TRUE
1324	900164919	Avicennia	germinans	Avicennia germinans	-74.6842	11.0097	SOUTH_AMERICA	CO		ciÃ©naga Grande de Santa Marta Natural-la raya	TRUE	TRUE	TRUE	TRUE	TRUE	TRUE	TRUE	TRUE	TRUE	TRUE
1325	900164855	Avicennia	germinans	Avicennia germinans	-74.6842	11.0097	SOUTH_AMERICA	CO		ciÃ©naga Grande de Santa Marta Salamanca Reforestado Retramar	TRUE	TRUE	TRUE	TRUE	TRUE	TRUE	TRUE	TRUE	TRUE	TRUE
1326	900164888	Avicennia	germinans	Avicennia germinans	-74.6842	11.0097	SOUTH_AMERICA	CO		ciÃ©naga Grande de Santa Marta Natural-la raya	TRUE	TRUE	TRUE	TRUE	TRUE	TRUE	TRUE	TRUE	TRUE	TRUE
1327	900164891	Avicennia	germinans	Avicennia germinans	-74.6842	11.0097	SOUTH_AMERICA	CO		ciÃ©naga Grande de Santa Marta Natural-la raya	TRUE	TRUE	TRUE	TRUE	TRUE	TRUE	TRUE	TRUE	TRUE	TRUE
1328	900164918	Avicennia	germinans	Avicennia germinans	-74.6842	11.0097	SOUTH_AMERICA	CO		ciÃ©naga Grande de Santa Marta Natural-la raya	TRUE	TRUE	TRUE	TRUE	TRUE	TRUE	TRUE	TRUE	TRUE	TRUE
1329	900164884	Avicennia	germinans	Avicennia germinans	-74.6842	11.0097	SOUTH_AMERICA	CO		ciÃ©naga Grande de Santa Marta Natural-la raya	TRUE	TRUE	TRUE	TRUE	TRUE	TRUE	TRUE	TRUE	TRUE	TRUE
1330	900164860	Avicennia	germinans	Avicennia germinans	-74.6842	11.0097	SOUTH_AMERICA	CO		ciÃ©naga Grande de Santa Marta Salamanca Reforestado Retramar	TRUE	TRUE	TRUE	TRUE	TRUE	TRUE	TRUE	TRUE	TRUE	TRUE
1331	900164893	Avicennia	germinans	Avicennia germinans	-74.6842	11.0097	SOUTH_AMERICA	CO		ciÃ©naga Grande de Santa Marta Salamanca Reforestado Retramar	TRUE	TRUE	TRUE	TRUE	TRUE	TRUE	TRUE	TRUE	TRUE	TRUE
1332	900164859	Avicennia	germinans	Avicennia germinans	-74.6842	11.0097	SOUTH_AMERICA	CO		ciÃ©naga Grande de Santa Marta Salamanca Reforestado Retramar	TRUE	TRUE	TRUE	TRUE	TRUE	TRUE	TRUE	TRUE	TRUE	TRUE
1333	900164862	Avicennia	germinans	Avicennia germinans	-74.6842	11.0097	SOUTH_AMERICA	CO		ciÃ©naga Grande de Santa Marta Salamanca Reforestado Retramar	TRUE	TRUE	TRUE	TRUE	TRUE	TRUE	TRUE	TRUE	TRUE	TRUE
1334	900164895	Avicennia	germinans	Avicennia germinans	-74.6842	11.0097	SOUTH_AMERICA	CO		ciÃ©naga Grande de Santa Marta Salamanca Reforestado Palermo	TRUE	TRUE	TRUE	TRUE	TRUE	TRUE	TRUE	TRUE	TRUE	TRUE
1335	900164858	Avicennia	germinans	Avicennia germinans	-74.6842	11.0097	SOUTH_AMERICA	CO		ciÃ©naga Grande de Santa Marta Salamanca Reforestado Retramar	TRUE	TRUE	TRUE	TRUE	TRUE	TRUE	TRUE	TRUE	TRUE	TRUE
1336	900164861	Avicennia	germinans	Avicennia germinans	-74.6842	11.0097	SOUTH_AMERICA	CO		ciÃ©naga Grande de Santa Marta Natural-la raya	TRUE	TRUE	TRUE	TRUE	TRUE	TRUE	TRUE	TRUE	TRUE	TRUE
1337	900164894	Avicennia	germinans	Avicennia germinans	-74.6842	11.0097	SOUTH_AMERICA	CO		ciÃ©naga Grande de Santa Marta Salamanca Reforestado Palermo	TRUE	TRUE	TRUE	TRUE	TRUE	TRUE	TRUE	TRUE	TRUE	TRUE
1338	900164924	Avicennia	germinans	Avicennia germinans	-74.6842	11.0097	SOUTH_AMERICA	CO		ciÃ©naga Grande de Santa Marta Natural-la raya	TRUE	TRUE	TRUE	TRUE	TRUE	TRUE	TRUE	TRUE	TRUE	TRUE
1339	900164864	Avicennia	germinans	Avicennia germinans	-74.6842	11.0097	SOUTH_AMERICA	CO		ciÃ©naga Grande de Santa Marta Salamanca Reforestado Retramar	TRUE	TRUE	TRUE	TRUE	TRUE	TRUE	TRUE	TRUE	TRUE	TRUE
1340	900164897	Avicennia	germinans	Avicennia germinans	-74.6842	11.0097	SOUTH_AMERICA	CO		ciÃ©naga Grande de Santa Marta Salamanca Reforestado Palermo	TRUE	TRUE	TRUE	TRUE	TRUE	TRUE	TRUE	TRUE	TRUE	TRUE
1341	900164930	Avicennia	germinans	Avicennia germinans	-74.6842	11.0097	SOUTH_AMERICA	CO		ciÃ©naga Grande de Santa Marta Natural-la raya	TRUE	TRUE	TRUE	TRUE	TRUE	TRUE	TRUE	TRUE	TRUE	TRUE
1342	911784078	Avicennia	germinans	Avicennia germinans	-74.4932	10.9819	SOUTH_AMERICA	CO		Carreterea CiÃ©naga- Barranquilla, km 25	TRUE	TRUE	TRUE	TRUE	TRUE	TRUE	TRUE	TRUE	TRUE	TRUE
1343	860848745	Avicennia	germinans	Avicennia germinans	-74.4681	10.978	SOUTH_AMERICA	CO		CangarÃº, km 25 carretera Barranquilla - CiÃ©naga	TRUE	TRUE	TRUE	TRUE	TRUE	TRUE	TRUE	TRUE	TRUE	TRUE
1344	900164906	Avicennia	germinans	Avicennia germinans	-74.125	11.3167	SOUTH_AMERICA	CO		Parque Nacional Natural Tayrona	TRUE	TRUE	TRUE	TRUE	TRUE	TRUE	TRUE	TRUE	TRUE	TRUE
1345	900164939	Avicennia	germinans	Avicennia germinans	-74.125	11.3167	SOUTH_AMERICA	CO		Parque Nacional Natural Tayrona	TRUE	TRUE	TRUE	TRUE	TRUE	TRUE	TRUE	TRUE	TRUE	TRUE
1346	900164928	Avicennia	germinans	Avicennia germinans	-74.125	11.3167	SOUTH_AMERICA	CO		Parque Nacional Natural Tayrona	TRUE	TRUE	TRUE	TRUE	TRUE	TRUE	TRUE	TRUE	TRUE	TRUE
1347	900164931	Avicennia	germinans	Avicennia germinans	-74.125	11.3167	SOUTH_AMERICA	CO		Parque Nacional Natural Tayrona	TRUE	TRUE	TRUE	TRUE	TRUE	TRUE	TRUE	TRUE	TRUE	TRUE
1348	900164943	Avicennia	germinans	Avicennia germinans	-74.125	11.3167	SOUTH_AMERICA	CO		Parque Nacional Natural Tayrona	TRUE	TRUE	TRUE	TRUE	TRUE	TRUE	TRUE	TRUE	TRUE	TRUE
1349	900164929	Avicennia	germinans	Avicennia germinans	-74.125	11.3167	SOUTH_AMERICA	CO		Parque Nacional Natural Tayrona	TRUE	TRUE	TRUE	TRUE	TRUE	TRUE	TRUE	TRUE	TRUE	TRUE
1350	900164932	Avicennia	germinans	Avicennia germinans	-74.125	11.3167	SOUTH_AMERICA	CO		Parque Nacional Natural Tayrona	TRUE	TRUE	TRUE	TRUE	TRUE	TRUE	TRUE	TRUE	TRUE	TRUE
1351	900164933	Avicennia	germinans	Avicennia germinans	-74.125	11.3167	SOUTH_AMERICA	CO		Parque Nacional Natural Tayrona	TRUE	TRUE	TRUE	TRUE	TRUE	TRUE	TRUE	TRUE	TRUE	TRUE
1352	900164926	Avicennia	germinans	Avicennia germinans	-74.125	11.3167	SOUTH_AMERICA	CO		Parque Nacional Natural Tayrona	TRUE	TRUE	TRUE	TRUE	TRUE	TRUE	TRUE	TRUE	TRUE	TRUE
1353	900164959	Avicennia	germinans	Avicennia germinans	-74.125	11.3167	SOUTH_AMERICA	CO		Parque Nacional Natural Tayrona	TRUE	TRUE	TRUE	TRUE	TRUE	TRUE	TRUE	TRUE	TRUE	TRUE
1354	900164934	Avicennia	germinans	Avicennia germinans	-74.125	11.3167	SOUTH_AMERICA	CO		Parque Nacional Natural Tayrona	TRUE	TRUE	TRUE	TRUE	TRUE	TRUE	TRUE	TRUE	TRUE	TRUE
1355	900164917	Avicennia	germinans	Avicennia germinans	-74.125	11.3167	SOUTH_AMERICA	CO		Parque Nacional Natural Tayrona	TRUE	TRUE	TRUE	TRUE	TRUE	TRUE	TRUE	TRUE	TRUE	TRUE
1356	900164489	Avicennia	germinans	Avicennia germinans	-74.125	11.3167	SOUTH_AMERICA	CO		Parque Nacional Natural Tayrona	TRUE	TRUE	TRUE	TRUE	TRUE	TRUE	TRUE	TRUE	TRUE	TRUE
1357	900164951	Avicennia	germinans	Avicennia germinans	-74.125	11.3167	SOUTH_AMERICA	CO		Parque Nacional Natural Tayrona	TRUE	TRUE	TRUE	TRUE	TRUE	TRUE	TRUE	TRUE	TRUE	TRUE
1358	900164476	Avicennia	germinans	Avicennia germinans	-74.125	11.3167	SOUTH_AMERICA	CO		Parque Nacional Natural Tayrona	TRUE	TRUE	TRUE	TRUE	TRUE	TRUE	TRUE	TRUE	TRUE	TRUE
1359	900164902	Avicennia	germinans	Avicennia germinans	-74.125	11.3167	SOUTH_AMERICA	CO		Parque Nacional Natural Tayrona	TRUE	TRUE	TRUE	TRUE	TRUE	TRUE	TRUE	TRUE	TRUE	TRUE
1360	900164935	Avicennia	germinans	Avicennia germinans	-74.125	11.3167	SOUTH_AMERICA	CO		Parque Nacional Natural Tayrona	TRUE	TRUE	TRUE	TRUE	TRUE	TRUE	TRUE	TRUE	TRUE	TRUE
1361	900164909	Avicennia	germinans	Avicennia germinans	-74.125	11.3167	SOUTH_AMERICA	CO		Parque Nacional Natural Tayrona	TRUE	TRUE	TRUE	TRUE	TRUE	TRUE	TRUE	TRUE	TRUE	TRUE
1362	900164912	Avicennia	germinans	Avicennia germinans	-74.125	11.3167	SOUTH_AMERICA	CO		Parque Nacional Natural Tayrona	TRUE	TRUE	TRUE	TRUE	TRUE	TRUE	TRUE	TRUE	TRUE	TRUE
1363	900164945	Avicennia	germinans	Avicennia germinans	-74.125	11.3167	SOUTH_AMERICA	CO		Parque Nacional Natural Tayrona	TRUE	TRUE	TRUE	TRUE	TRUE	TRUE	TRUE	TRUE	TRUE	TRUE
1364	900164477	Avicennia	germinans	Avicennia germinans	-74.125	11.3167	SOUTH_AMERICA	CO		Parque Nacional Natural Tayrona	TRUE	TRUE	TRUE	TRUE	TRUE	TRUE	TRUE	TRUE	TRUE	TRUE
1365	900164936	Avicennia	germinans	Avicennia germinans	-74.125	11.3167	SOUTH_AMERICA	CO		Parque Nacional Natural Tayrona	TRUE	TRUE	TRUE	TRUE	TRUE	TRUE	TRUE	TRUE	TRUE	TRUE
1366	900164969	Avicennia	germinans	Avicennia germinans	-74.125	11.3167	SOUTH_AMERICA	CO		Parque Nacional Natural Tayrona	TRUE	TRUE	TRUE	TRUE	TRUE	TRUE	TRUE	TRUE	TRUE	TRUE
1367	900164478	Avicennia	germinans	Avicennia germinans	-74.125	11.3167	SOUTH_AMERICA	CO		Parque Nacional Natural Tayrona	TRUE	TRUE	TRUE	TRUE	TRUE	TRUE	TRUE	TRUE	TRUE	TRUE
1368	900164481	Avicennia	germinans	Avicennia germinans	-74.125	11.3167	SOUTH_AMERICA	CO		Parque Nacional Natural Tayrona	TRUE	TRUE	TRUE	TRUE	TRUE	TRUE	TRUE	TRUE	TRUE	TRUE
1369	900164937	Avicennia	germinans	Avicennia germinans	-74.125	11.3167	SOUTH_AMERICA	CO		Parque Nacional Natural Tayrona	TRUE	TRUE	TRUE	TRUE	TRUE	TRUE	TRUE	TRUE	TRUE	TRUE
1370	900164940	Avicennia	germinans	Avicennia germinans	-74.125	11.3167	SOUTH_AMERICA	CO		Parque Nacional Natural Tayrona	TRUE	TRUE	TRUE	TRUE	TRUE	TRUE	TRUE	TRUE	TRUE	TRUE
1371	900164886	Avicennia	germinans	Avicennia germinans	-74.125	11.3167	SOUTH_AMERICA	CO		Parque Nacional Natural Tayrona	TRUE	TRUE	TRUE	TRUE	TRUE	TRUE	TRUE	TRUE	TRUE	TRUE
1372	900164916	Avicennia	germinans	Avicennia germinans	-74.125	11.3167	SOUTH_AMERICA	CO		Parque Nacional Natural Tayrona	TRUE	TRUE	TRUE	TRUE	TRUE	TRUE	TRUE	TRUE	TRUE	TRUE
1373	900164938	Avicennia	germinans	Avicennia germinans	-74.125	11.3167	SOUTH_AMERICA	CO		Parque Nacional Natural Tayrona	TRUE	TRUE	TRUE	TRUE	TRUE	TRUE	TRUE	TRUE	TRUE	TRUE
1374	900164941	Avicennia	germinans	Avicennia germinans	-74.125	11.3167	SOUTH_AMERICA	CO		Parque Nacional Natural Tayrona	TRUE	TRUE	TRUE	TRUE	TRUE	TRUE	TRUE	TRUE	TRUE	TRUE
1375	900164490	Avicennia	germinans	Avicennia germinans	-74.125	11.3167	SOUTH_AMERICA	CO		Parque Nacional Natural Tayrona	TRUE	TRUE	TRUE	TRUE	TRUE	TRUE	TRUE	TRUE	TRUE	TRUE
1376	900164913	Avicennia	germinans	Avicennia germinans	-74.125	11.3167	SOUTH_AMERICA	CO		Parque Nacional Natural Tayrona	TRUE	TRUE	TRUE	TRUE	TRUE	TRUE	TRUE	TRUE	TRUE	TRUE
1377	900164946	Avicennia	germinans	Avicennia germinans	-74.125	11.3167	SOUTH_AMERICA	CO		Parque Nacional Natural Tayrona	TRUE	TRUE	TRUE	TRUE	TRUE	TRUE	TRUE	TRUE	TRUE	TRUE
1378	900164908	Avicennia	germinans	Avicennia germinans	-74.125	11.3167	SOUTH_AMERICA	CO		Parque Nacional Natural Tayrona	TRUE	TRUE	TRUE	TRUE	TRUE	TRUE	TRUE	TRUE	TRUE	TRUE
1379	900164911	Avicennia	germinans	Avicennia germinans	-74.125	11.3167	SOUTH_AMERICA	CO		Parque Nacional Natural Tayrona	TRUE	TRUE	TRUE	TRUE	TRUE	TRUE	TRUE	TRUE	TRUE	TRUE
1380	900164944	Avicennia	germinans	Avicennia germinans	-74.125	11.3167	SOUTH_AMERICA	CO		Parque Nacional Natural Tayrona	TRUE	TRUE	TRUE	TRUE	TRUE	TRUE	TRUE	TRUE	TRUE	TRUE
1381	900164922	Avicennia	germinans	Avicennia germinans	-74.125	11.3167	SOUTH_AMERICA	CO		Parque Nacional Natural Tayrona	TRUE	TRUE	TRUE	TRUE	TRUE	TRUE	TRUE	TRUE	TRUE	TRUE
1382	900164955	Avicennia	germinans	Avicennia germinans	-74.125	11.3167	SOUTH_AMERICA	CO		Parque Nacional Natural Tayrona	TRUE	TRUE	TRUE	TRUE	TRUE	TRUE	TRUE	TRUE	TRUE	TRUE
1383	900164921	Avicennia	germinans	Avicennia germinans	-74.125	11.3167	SOUTH_AMERICA	CO		Parque Nacional Natural Tayrona	TRUE	TRUE	TRUE	TRUE	TRUE	TRUE	TRUE	TRUE	TRUE	TRUE
1384	900164488	Avicennia	germinans	Avicennia germinans	-74.125	11.3167	SOUTH_AMERICA	CO		Parque Nacional Natural Tayrona	TRUE	TRUE	TRUE	TRUE	TRUE	TRUE	TRUE	TRUE	TRUE	TRUE
1385	900164914	Avicennia	germinans	Avicennia germinans	-74.125	11.3167	SOUTH_AMERICA	CO		Parque Nacional Natural Tayrona	TRUE	TRUE	TRUE	TRUE	TRUE	TRUE	TRUE	TRUE	TRUE	TRUE
1386	900164947	Avicennia	germinans	Avicennia germinans	-74.125	11.3167	SOUTH_AMERICA	CO		Parque Nacional Natural Tayrona	TRUE	TRUE	TRUE	TRUE	TRUE	TRUE	TRUE	TRUE	TRUE	TRUE
1387	900164950	Avicennia	germinans	Avicennia germinans	-74.125	11.3167	SOUTH_AMERICA	CO		Parque Nacional Natural Tayrona	TRUE	TRUE	TRUE	TRUE	TRUE	TRUE	TRUE	TRUE	TRUE	TRUE
1388	900164923	Avicennia	germinans	Avicennia germinans	-74.125	11.3167	SOUTH_AMERICA	CO		Parque Nacional Natural Tayrona	TRUE	TRUE	TRUE	TRUE	TRUE	TRUE	TRUE	TRUE	TRUE	TRUE
1389	900164925	Avicennia	germinans	Avicennia germinans	-74.125	11.3167	SOUTH_AMERICA	CO		Parque Nacional Natural Tayrona	TRUE	TRUE	TRUE	TRUE	TRUE	TRUE	TRUE	TRUE	TRUE	TRUE
1390	900164958	Avicennia	germinans	Avicennia germinans	-74.125	11.3167	SOUTH_AMERICA	CO		Parque Nacional Natural Tayrona	TRUE	TRUE	TRUE	TRUE	TRUE	TRUE	TRUE	TRUE	TRUE	TRUE
1391	900164927	Avicennia	germinans	Avicennia germinans	-74.125	11.3167	SOUTH_AMERICA	CO		Parque Nacional Natural Tayrona	TRUE	TRUE	TRUE	TRUE	TRUE	TRUE	TRUE	TRUE	TRUE	TRUE
1392	731402565	Avicennia	germinans	Avicennia germinans	-74.0803	11.3156		CO		Parque Nacional Tayrona.	TRUE	TRUE	TRUE	TRUE	TRUE	TRUE	TRUE	TRUE	TRUE	TRUE
1393	416338300	Avicennia	germinans	Avicennia germinans	-74.0803	11.3156		CO		Parque Nacional Tayrona.	TRUE	TRUE	TRUE	TRUE	TRUE	TRUE	TRUE	TRUE	TRUE	TRUE
1394	731402569	Avicennia	germinans	Avicennia germinans	-74.0557	10.8887		CO		SI.	TRUE	TRUE	TRUE	TRUE	TRUE	TRUE	TRUE	TRUE	TRUE	TRUE
1395	416338298	Avicennia	germinans	Avicennia germinans	-74.0557	10.8887		CO		SI.	TRUE	TRUE	TRUE	TRUE	TRUE	TRUE	TRUE	TRUE	TRUE	TRUE
1397	319179384	Avicennia	germinans	Avicennia germinans	-72.42	11.42	SOUTH_AMERICA	CO		Municipios de Manaure-Riohacha: PequeÃ±o oasis en la vÃ­a Manaure-Musichi.	TRUE	TRUE	TRUE	TRUE	TRUE	TRUE	TRUE	TRUE	TRUE	TRUE
1398	931008661	Avicennia	germinans	Avicennia germinans	-72.4167	11.4167	SOUTH_AMERICA	CO		VÃ­a Manaure-Musichi	TRUE	TRUE	TRUE	TRUE	TRUE	TRUE	TRUE	TRUE	TRUE	TRUE
1399	319179493	Avicennia	germinans	Avicennia germinans	-71.97	12.08	SOUTH_AMERICA	CO		Corregimiento Puerto Portete, carretera Puerto BolÃ­var-Puerto Portete, orilla del mar.	TRUE	TRUE	TRUE	TRUE	TRUE	TRUE	TRUE	TRUE	TRUE	TRUE
1400	145690378	Avicennia	germinans	Avicennia germinans	-71.9667	12.0833		CO		Corregfimiento Puerto Portete, carretera Puerto Bolivar - Puerto Portete.	TRUE	TRUE	TRUE	TRUE	TRUE	TRUE	TRUE	TRUE	TRUE	TRUE
1401	731402573	Avicennia	germinans	Avicennia germinans	-71.9667	12.0833		CO		Corregfimiento Puerto Portete, carretera Puerto Bolivar - Puerto Portete.	TRUE	TRUE	TRUE	TRUE	TRUE	TRUE	TRUE	TRUE	TRUE	TRUE
1402	319180119	Avicennia	germinans	Avicennia germinans	-71.65	17.92	NORTH_AMERICA	DO		PenÃ­nsula de Barahona: 1 km sur del puerto de Cabo Rojo de Alcoa Exploration Company: un manglar (no en la costa) de Rhizophora y Avicennia, en la orilla este de la carretera.	TRUE	TRUE	TRUE	TRUE	TRUE	TRUE	TRUE	TRUE	TRUE	TRUE
1405	319180158	Avicennia	germinans	Avicennia germinans	-70.8	19.85	NORTH_AMERICA	DO		Municipio de Puerto Plata, secciÃ³n MaimÃ³n, paraje La Isla, El Albinal; pantanal rodeado de formaciones de roca caliza, a orillas del mar, frente a la isla Cabra o isla Grande.	TRUE	TRUE	TRUE	TRUE	TRUE	TRUE	TRUE	TRUE	TRUE	TRUE
1409	319180109	Avicennia	germinans	Avicennia germinans	-69.62	18.45	NORTH_AMERICA	DO		Llanura Costera; Distrito Nacional: Isla Matica, frente a la playa de Boca Chica, dos cayos muy pequenos, mayormente Rhizophora mangle y Laguncularia racemosa.	TRUE	TRUE	TRUE	TRUE	TRUE	TRUE	TRUE	TRUE	TRUE	TRUE
1410	319180115	Avicennia	germinans	Avicennia germinans	-69.6	18.45	NORTH_AMERICA	DO		Distrito Nacional: Isla La Matica, near east beach of Playa Boca Chica; natural island, very low, surrounded by 4 spp. mangroves, dry part with coconuts and shrubs.	TRUE	TRUE	TRUE	TRUE	TRUE	TRUE	TRUE	TRUE	TRUE	TRUE
1411	319180111	Avicennia	germinans	Avicennia germinans	-69.6	18.45	NORTH_AMERICA	DO		Distrito Nacional: Isla La Matica, near East Beach of Playa Boca Chica at Boca; natural island, very low, surrounded by 4 spp. of mangroves, dry part with coconunts and shrubs.	TRUE	TRUE	TRUE	TRUE	TRUE	TRUE	TRUE	TRUE	TRUE	TRUE
1412	997529582	Avicennia	germinans	Avicennia germinans	-69.59	18.45		DO		Distrito Nacional: Isla La Matica, near east beach of Playa Boca Chica	TRUE	TRUE	TRUE	TRUE	TRUE	TRUE	TRUE	TRUE	TRUE	TRUE
1413	319180127	Avicennia	germinans	Avicennia germinans	-69.28	18.47	NORTH_AMERICA	DO		Town S of Boca de Soco, at SW bank of Rio Soco at its mouth, small village along river and sea coast.	TRUE	TRUE	TRUE	TRUE	TRUE	TRUE	TRUE	TRUE	TRUE	TRUE
1414	1020341002	Avicennia	germinans	Avicennia germinans	-69.1	12.2667	SOUTH_AMERICA	CW			TRUE	TRUE	TRUE	TRUE	TRUE	TRUE	TRUE	TRUE	TRUE	TRUE
1415	1020341003	Avicennia	germinans	Avicennia germinans	-69.1	12.2667	SOUTH_AMERICA	CW			TRUE	TRUE	TRUE	TRUE	TRUE	TRUE	TRUE	TRUE	TRUE	TRUE
1423	216401655	Avicennia	germinans	Avicennia germinans	-67.1468	18.0563	NORTH_AMERICA	PR			TRUE	TRUE	TRUE	TRUE	TRUE	TRUE	TRUE	TRUE	TRUE	TRUE
1424	216401599	Avicennia	germinans	Avicennia germinans	-67.0453	17.9907	NORTH_AMERICA	PR		La Parguera.	TRUE	TRUE	TRUE	TRUE	TRUE	TRUE	TRUE	TRUE	TRUE	TRUE
1428	319179365	Avicennia	germinans	Avicennia germinans	-65.83	18.42	NORTH_AMERICA	PR		Municipio RÃ­o Grande: Punta PicÃºa, along the access road from the condominiums at the point for about 7 km along the point. Mangroves and thickets.	TRUE	TRUE	TRUE	TRUE	TRUE	TRUE	TRUE	TRUE	TRUE	TRUE
1429	216401637	Avicennia	germinans	Avicennia germinans	-65.8	18.4	NORTH_AMERICA	PR		Mangrove ca. 2 km N of highway 3, just E of town of RÃ­o Grande.	TRUE	TRUE	TRUE	TRUE	TRUE	TRUE	TRUE	TRUE	TRUE	TRUE
1430	319179328	Avicennia	germinans	Avicennia germinans	-65.77	18.38	NORTH_AMERICA	PR		Municipio of Lugillo. West side of Punta PicÃºa.	TRUE	TRUE	TRUE	TRUE	TRUE	TRUE	TRUE	TRUE	TRUE	TRUE
1431	415960225	Avicennia	germinans	Avicennia germinans	-65.6528	18.3278		PR		El Conquistador Resort & Country Club	TRUE	TRUE	TRUE	TRUE	TRUE	TRUE	TRUE	TRUE	TRUE	TRUE
1433	216401502	Avicennia	germinans	Avicennia germinans	-65.444	18.155	NORTH_AMERICA	PR		Light house peninsula.	TRUE	TRUE	TRUE	TRUE	TRUE	TRUE	TRUE	TRUE	TRUE	TRUE
1434	216401501	Avicennia	germinans	Avicennia germinans	-65.424	18.129	NORTH_AMERICA	PR			TRUE	TRUE	TRUE	TRUE	TRUE	TRUE	TRUE	TRUE	TRUE	TRUE
1435	216401500	Avicennia	germinans	Avicennia germinans	-65.3569	18.1281	NORTH_AMERICA	PR		Ensenada Honda. Ensenada Honda to Puerto Medio.	TRUE	TRUE	TRUE	TRUE	TRUE	TRUE	TRUE	TRUE	TRUE	TRUE
1440	319179980	Avicennia	germinans	Avicennia germinans	-65.13	10.07	SOUTH_AMERICA	VE		Arbol de 4-6 m de altura con flores blancas.	TRUE	TRUE	TRUE	TRUE	TRUE	TRUE	TRUE	TRUE	TRUE	TRUE
1441	319180019	Avicennia	germinans	Avicennia germinans	-65.13	10.07	SOUTH_AMERICA	VE		PeÃ±alver. Municpio FederaciÃ³n. Zona de Manglar con influencia del RÃ­o Unare, cerca de la lÃ­nea de costa	TRUE	TRUE	TRUE	TRUE	TRUE	TRUE	TRUE	TRUE	TRUE	TRUE
1442	319179440	Avicennia	germinans	Avicennia germinans	-63.77	10.65	SOUTH_AMERICA	VE		Peninsula de Araya, ca. 26 km northwest of Cariaco by air, immediately west of turnoff to new road. Mangrove and sea shore plants.	TRUE	TRUE	TRUE	TRUE	TRUE	TRUE	TRUE	TRUE	TRUE	TRUE
1444	1020340946	Avicennia	germinans	Avicennia germinans	-62.8333	10.55	SOUTH_AMERICA	VE			TRUE	TRUE	TRUE	TRUE	TRUE	TRUE	TRUE	TRUE	TRUE	TRUE
1445	1020340956	Avicennia	germinans	Avicennia germinans	-62.8333	10.55	SOUTH_AMERICA	VE			TRUE	TRUE	TRUE	TRUE	TRUE	TRUE	TRUE	TRUE	TRUE	TRUE
1447	997145521	Avicennia	germinans	Avicennia germinans	-62.7833	10.0333	SOUTH_AMERICA	VE			TRUE	TRUE	TRUE	TRUE	TRUE	TRUE	TRUE	TRUE	TRUE	TRUE
1448	1020340966	Avicennia	germinans	Avicennia germinans	-62.7833	10.0333	SOUTH_AMERICA	VE			TRUE	TRUE	TRUE	TRUE	TRUE	TRUE	TRUE	TRUE	TRUE	TRUE
1449	1020340970	Avicennia	germinans	Avicennia germinans	-62.7833	10.0333	SOUTH_AMERICA	VE			TRUE	TRUE	TRUE	TRUE	TRUE	TRUE	TRUE	TRUE	TRUE	TRUE
1450	1020340950	Avicennia	germinans	Avicennia germinans	-62.7833	10.0333	SOUTH_AMERICA	VE			TRUE	TRUE	TRUE	TRUE	TRUE	TRUE	TRUE	TRUE	TRUE	TRUE
1451	1023635114	Avicennia	germinans	Avicennia germinans	-62.7833	10.0333	SOUTH_AMERICA	VE			TRUE	TRUE	TRUE	TRUE	TRUE	TRUE	TRUE	TRUE	TRUE	TRUE
1452	1020340979	Avicennia	germinans	Avicennia germinans	-62.7833	10.0333	SOUTH_AMERICA	VE			TRUE	TRUE	TRUE	TRUE	TRUE	TRUE	TRUE	TRUE	TRUE	TRUE
1453	1020369180	Avicennia	germinans	Avicennia germinans	-62.7833	10.0333	SOUTH_AMERICA	VE			TRUE	TRUE	TRUE	TRUE	TRUE	TRUE	TRUE	TRUE	TRUE	TRUE
1454	1020340985	Avicennia	germinans	Avicennia germinans	-62.7833	10.0333	SOUTH_AMERICA	VE			TRUE	TRUE	TRUE	TRUE	TRUE	TRUE	TRUE	TRUE	TRUE	TRUE
1455	1020340959	Avicennia	germinans	Avicennia germinans	-62.7833	10.0333	SOUTH_AMERICA	VE			TRUE	TRUE	TRUE	TRUE	TRUE	TRUE	TRUE	TRUE	TRUE	TRUE
1456	1020340962	Avicennia	germinans	Avicennia germinans	-62.7833	10.0333	SOUTH_AMERICA	VE			TRUE	TRUE	TRUE	TRUE	TRUE	TRUE	TRUE	TRUE	TRUE	TRUE
1457	997145536	Avicennia	germinans	Avicennia germinans	-62.7833	10.0333	SOUTH_AMERICA	VE			TRUE	TRUE	TRUE	TRUE	TRUE	TRUE	TRUE	TRUE	TRUE	TRUE
1459	319180011	Avicennia	germinans	Avicennia germinans	-62.13	9.92	SOUTH_AMERICA	VE		Depto. Pedernales: mangrove formation (Rhizophora mangle and Avicennia germinans) along CaÃ±o Angosturita, SE of Pedernales	TRUE	TRUE	TRUE	TRUE	TRUE	TRUE	TRUE	TRUE	TRUE	TRUE
1460	319179335	Avicennia	germinans	Avicennia germinans	-62.07	10.65	SOUTH_AMERICA	VE		Peninsula de Paria: Cerro Patao. Swamp. 62Âº04'W, 10Âº39'N. Elev. 0 feet.	TRUE	TRUE	TRUE	TRUE	TRUE	TRUE	TRUE	TRUE	TRUE	TRUE
1461	998718193	Avicennia	germinans	Avicennia germinans	-61.507	16.472		FR			TRUE	TRUE	TRUE	TRUE	TRUE	TRUE	TRUE	TRUE	TRUE	TRUE
1462	319179886	Avicennia	germinans	Avicennia germinans	-61.43	10.62	NORTH_AMERICA	TT		Caroni. Eastern margin of Caroni swamp, 400m. W. of Princess margret Highway Om.	TRUE	TRUE	TRUE	TRUE	TRUE	TRUE	TRUE	TRUE	TRUE	TRUE
1465	319180156	Avicennia	germinans	Avicennia germinans	-60.97	9.5	SOUTH_AMERICA	VE		Depto. Pedernales (boundary with Depto. Tucupita): sand beach bordering open sandy mud flats and wet depressions, mouth of CaÃ±o Guiniquina, between Punta Araguabisi and Punta Baja, at Barra Guiniquina.	TRUE	TRUE	TRUE	TRUE	TRUE	TRUE	TRUE	TRUE	TRUE	TRUE
1466	319179982	Avicennia	germinans	Avicennia germinans	-60	8.17	SOUTH_AMERICA	GY		Amakura river, northwest district.	TRUE	TRUE	TRUE	TRUE	TRUE	TRUE	TRUE	TRUE	TRUE	TRUE
1474	724547503	Avicennia	germinans	Avicennia germinans	-58.1833	6.6667		GY		Area W of Demerara River, N and S of Wales, Essequibo Isl. - W. Demerara	TRUE	TRUE	TRUE	TRUE	TRUE	TRUE	TRUE	TRUE	TRUE	TRUE
1475	666268331	Avicennia	germinans	Avicennia germinans	-58	5.1667	SOUTH_AMERICA	GY			TRUE	TRUE	TRUE	TRUE	TRUE	TRUE	TRUE	TRUE	TRUE	TRUE
1476	319179986	Avicennia	germinans	Avicennia germinans	-57.92	6.63	SOUTH_AMERICA	GY		Demerara-Mahaica Region: Atlantic coastline W of Mahaica R, between seawall and hospital.	TRUE	TRUE	TRUE	TRUE	TRUE	TRUE	TRUE	TRUE	TRUE	TRUE
1477	319180125	Avicennia	germinans	Avicennia germinans	-57.92	6.63	SOUTH_AMERICA	GY		Demerara-Mahaica Region: Atlantic coastline facing leper colony & hospital at mouth of Mahaica R. Mangrove formations strand vegetation, disturbed areas. Along Mahaica Sluice & along edge of coconut plantation.	TRUE	TRUE	TRUE	TRUE	TRUE	TRUE	TRUE	TRUE	TRUE	TRUE
1478	724547502	Avicennia	germinans	Avicennia germinans	-57.9167	6.6333		GY		Atlantic coastline facing leper colony et hosp, Demerara - Mahaica	TRUE	TRUE	TRUE	TRUE	TRUE	TRUE	TRUE	TRUE	TRUE	TRUE
1479	724547482	Avicennia	germinans	Avicennia germinans	-57.8333	6.5833		GY		Along road from Cane Grove to Lama Conservanc, Demerara - Mahaica	TRUE	TRUE	TRUE	TRUE	TRUE	TRUE	TRUE	TRUE	TRUE	TRUE
1480	930980408	Avicennia	germinans	Avicennia germinans	-57.7833	6.58333	SOUTH_AMERICA	GY			TRUE	TRUE	TRUE	TRUE	TRUE	TRUE	TRUE	TRUE	TRUE	TRUE
1481	724547486	Avicennia	germinans	Avicennia germinans	-57.7833	6.5833		GY		Abary River mouth et along canals leading, Mahaica - Berbice	TRUE	TRUE	TRUE	TRUE	TRUE	TRUE	TRUE	TRUE	TRUE	TRUE
1482	1042588872	Avicennia	germinans	Avicennia germinans	-57.78	6.58333	SOUTH_AMERICA	GY		Region: Mahaica-Berbice. Abary River mouth & along canals leading into river, between coastal hwy & acean	TRUE	TRUE	TRUE	TRUE	TRUE	TRUE	TRUE	TRUE	TRUE	TRUE
1483	319180013	Avicennia	germinans	Avicennia germinans	-57.78	6.58	SOUTH_AMERICA	GY		Region Mahaica-Berbice. Abary River mouth & along canals leading into river, between coastal hwy & ocean. Mangrove formations. Dominants: Rhizophora, Avicennia, and Conocarpus.	TRUE	TRUE	TRUE	TRUE	TRUE	TRUE	TRUE	TRUE	TRUE	TRUE
1484	319179603	Avicennia	germinans	Avicennia germinans	-57.57	6.33	SOUTH_AMERICA	GY		98.2 km E of Georgetown, along the coastal hwy. Vicinity of Expectation. Border of mangrove swamp forest.	TRUE	TRUE	TRUE	TRUE	TRUE	TRUE	TRUE	TRUE	TRUE	TRUE
1485	319179604	Avicennia	germinans	Avicennia germinans	-57.57	6.33	SOUTH_AMERICA	GY		98.2 km E of Georgetown, along the coastal hwy. Vicinity of Expectation. Border of mangrove swamp forest.	TRUE	TRUE	TRUE	TRUE	TRUE	TRUE	TRUE	TRUE	TRUE	TRUE
1486	724547481	Avicennia	germinans	Avicennia germinans	-57.3667	6.0833		GY		Canje River near Black Bush canal, East Berbice - Corentyne	TRUE	TRUE	TRUE	TRUE	TRUE	TRUE	TRUE	TRUE	TRUE	TRUE
1487	319180104	Avicennia	germinans	Avicennia germinans	-57.33	6	SOUTH_AMERICA	GY		Region: E. Berbice-Corentyne. Canje River, 10-25 km upriver from mouth. Herbaceous marshland, secondary riverbank scrub. Mangrove forest remnants.	TRUE	TRUE	TRUE	TRUE	TRUE	TRUE	TRUE	TRUE	TRUE	TRUE
1488	1020341004	Avicennia	germinans	Avicennia germinans	-55.7667	5.83333	SOUTH_AMERICA	SR			TRUE	TRUE	TRUE	TRUE	TRUE	TRUE	TRUE	TRUE	TRUE	TRUE
1489	997113539	Avicennia	germinans	Avicennia germinans	-53.05	5.28333	SOUTH_AMERICA	GF			TRUE	TRUE	TRUE	TRUE	TRUE	TRUE	TRUE	TRUE	TRUE	TRUE
1490	724547468	Avicennia	germinans	Avicennia germinans	-53.0333	5.45		FR		Riviere Canceler, Region littorale	TRUE	TRUE	TRUE	TRUE	TRUE	TRUE	TRUE	TRUE	TRUE	TRUE
1491	724547402	Avicennia	germinans	Avicennia germinans	-53	4.9167		FR		Fleuve Sinnamary, Bassin du Sinnamary	TRUE	TRUE	TRUE	TRUE	TRUE	TRUE	TRUE	TRUE	TRUE	TRUE
1492	724547386	Avicennia	germinans	Avicennia germinans	-52.9	5.4		FR		Route de l'Anse - 1, Region littorale	TRUE	TRUE	TRUE	TRUE	TRUE	TRUE	TRUE	TRUE	TRUE	TRUE
1493	724547400	Avicennia	germinans	Avicennia germinans	-52.84	5.34		FR		Plage de l' Anse - 1, Region littorale	TRUE	TRUE	TRUE	TRUE	TRUE	TRUE	TRUE	TRUE	TRUE	TRUE
1494	724547390	Avicennia	germinans	Avicennia germinans	-52.805	5.3167				Estuaire du Malmanoury, Region littorale	TRUE	TRUE	TRUE	TRUE	TRUE	TRUE	TRUE	TRUE	TRUE	TRUE
1496	724547466	Avicennia	germinans	Avicennia germinans	-52.7	5.0167		FR		Degrad Saramaca, Bassin du Kourou	TRUE	TRUE	TRUE	TRUE	TRUE	TRUE	TRUE	TRUE	TRUE	TRUE
1497	724547405	Avicennia	germinans	Avicennia germinans	-52.7	5		FR		Riviere Kourou, Bassin du Kourou	TRUE	TRUE	TRUE	TRUE	TRUE	TRUE	TRUE	TRUE	TRUE	TRUE
1498	724547407	Avicennia	germinans	Avicennia germinans	-52.7	5		FR		Riviere Kourou, Bassin du Kourou	TRUE	TRUE	TRUE	TRUE	TRUE	TRUE	TRUE	TRUE	TRUE	TRUE
1499	724547408	Avicennia	germinans	Avicennia germinans	-52.6833	5.15		FR		Pont sur le Kourou, Region littorale	TRUE	TRUE	TRUE	TRUE	TRUE	TRUE	TRUE	TRUE	TRUE	TRUE
1500	724547409	Avicennia	germinans	Avicennia germinans	-52.6833	5.15		FR		Pont sur le Kourou, Region littorale	TRUE	TRUE	TRUE	TRUE	TRUE	TRUE	TRUE	TRUE	TRUE	TRUE
1501	724547413	Avicennia	germinans	Avicennia germinans	-52.6367	5.1517		FR		Village Saramaca - Kourou, Region littorale	TRUE	TRUE	TRUE	TRUE	TRUE	TRUE	TRUE	TRUE	TRUE	TRUE
1502	724547414	Avicennia	germinans	Avicennia germinans	-52.6367	5.1517		FR		Village Saramaca - Kourou, Region littorale	TRUE	TRUE	TRUE	TRUE	TRUE	TRUE	TRUE	TRUE	TRUE	TRUE
1503	724547411	Avicennia	germinans	Avicennia germinans	-52.6367	5.1517		FR		Village Saramaca - Kourou, Region littorale	TRUE	TRUE	TRUE	TRUE	TRUE	TRUE	TRUE	TRUE	TRUE	TRUE
1504	724547412	Avicennia	germinans	Avicennia germinans	-52.6367	5.1517		FR		Village Saramaca - Kourou, Region littorale	TRUE	TRUE	TRUE	TRUE	TRUE	TRUE	TRUE	TRUE	TRUE	TRUE
1505	724547406	Avicennia	germinans	Avicennia germinans	-52.5833	4.805		FR		Riviere de Tonnegrande, Region de Cayenne	TRUE	TRUE	TRUE	TRUE	TRUE	TRUE	TRUE	TRUE	TRUE	TRUE
1506	724547469	Avicennia	germinans	Avicennia germinans	-52.3333	4.9167		FR		Marais Leblond, Ile de Cayenne	TRUE	TRUE	TRUE	TRUE	TRUE	TRUE	TRUE	TRUE	TRUE	TRUE
1507	724547495	Avicennia	germinans	Avicennia germinans	-52.3175	4.9408		FR		Centre ORSTOM, Ile de Cayenne	TRUE	TRUE	TRUE	TRUE	TRUE	TRUE	TRUE	TRUE	TRUE	TRUE
1508	724547492	Avicennia	germinans	Avicennia germinans	-52.3175	4.9408		FR		Centre I.R.D., Ile de Cayenne	TRUE	TRUE	TRUE	TRUE	TRUE	TRUE	TRUE	TRUE	TRUE	TRUE
1509	997058631	Avicennia	germinans	Avicennia germinans	-52.3167	4.93333	SOUTH_AMERICA	GF			TRUE	TRUE	TRUE	TRUE	TRUE	TRUE	TRUE	TRUE	TRUE	TRUE
1510	250736564	Avicennia	germinans	Avicennia germinans	-52.3167	4.93333		GF		Cayenne	TRUE	TRUE	TRUE	TRUE	TRUE	TRUE	TRUE	TRUE	TRUE	TRUE
1511	724547392	Avicennia	germinans	Avicennia germinans	-52.3	4.94		FR		Anse de Montabo, Ile de Cayenne	TRUE	TRUE	TRUE	TRUE	TRUE	TRUE	TRUE	TRUE	TRUE	TRUE
1512	724547404	Avicennia	germinans	Avicennia germinans	-52.3	4.9333		FR		Ile de Cayenne - 2, Ile de Cayenne	TRUE	TRUE	TRUE	TRUE	TRUE	TRUE	TRUE	TRUE	TRUE	TRUE
1513	724547477	Avicennia	germinans	Avicennia germinans	-52.3	4.9333		FR		Ile de Cayenne - 2, Ile de Cayenne	TRUE	TRUE	TRUE	TRUE	TRUE	TRUE	TRUE	TRUE	TRUE	TRUE
1514	724547387	Avicennia	germinans	Avicennia germinans	-52.3	4.9333		FR		Ile de Cayenne - 2, Ile de Cayenne	TRUE	TRUE	TRUE	TRUE	TRUE	TRUE	TRUE	TRUE	TRUE	TRUE
1522	724547391	Avicennia	germinans	Avicennia germinans	-51.7	4.0333		FR		Region du Bas Oyapock, Region littorale	TRUE	TRUE	TRUE	TRUE	TRUE	TRUE	TRUE	TRUE	TRUE	TRUE
1526	1086965053	Avicennia	germinans	Avicennia germinans	-47.1187	-1.15333		BR	Tracuateua	Porto Alemanha, manguezal na margem da estrada par	TRUE	TRUE	TRUE	TRUE	TRUE	TRUE	TRUE	TRUE	TRUE	TRUE
1527	1086926459	Avicennia	germinans	Avicennia germinans	-45.07	-23.43		BR	Ubatuba		TRUE	TRUE	TRUE	TRUE	TRUE	TRUE	TRUE	TRUE	TRUE	TRUE
1528	1077275167	Avicennia	germinans	Avicennia germinans	-44.7131	-23.2178		BR	ParatÃ­	Praia do Jabaquara, Rio de Janeiro - ParatÃ­, praia do Jabaquara.	TRUE	TRUE	TRUE	TRUE	TRUE	TRUE	TRUE	TRUE	TRUE	TRUE
1532	1087657632	Avicennia	germinans	Avicennia germinans	-44.2728	-2.59639	SOUTH_AMERICA	BR	SÃ£o LuÃ­s	Parque Estadual do Bacanga	TRUE	TRUE	TRUE	TRUE	TRUE	TRUE	TRUE	TRUE	TRUE	TRUE
1533	1087722143	Avicennia	germinans	Avicennia germinans	-44.0448	-2.86582		BR	Morros	Margem direita Sub. Rio Munim.	TRUE	TRUE	TRUE	TRUE	TRUE	TRUE	TRUE	TRUE	TRUE	TRUE
1534	911586164	Avicennia	germinans	Avicennia germinans	-42.3	-22.6		BR	MacaÃ©	Rio MacaÃ© (Foz).	TRUE	TRUE	TRUE	TRUE	TRUE	TRUE	TRUE	TRUE	TRUE	TRUE
1535	1086971257	Avicennia	germinans	Avicennia germinans	-41.9031	-2.89		BR	Araioses	Ilha do Caju	TRUE	TRUE	TRUE	TRUE	TRUE	TRUE	TRUE	TRUE	TRUE	TRUE
1536	1086970419	Avicennia	germinans	Avicennia germinans	-41.7767	-2.90472		BR	Parnaiba	Pontal	TRUE	TRUE	TRUE	TRUE	TRUE	TRUE	TRUE	TRUE	TRUE	TRUE
1537	1086972028	Avicennia	germinans	Avicennia germinans	-41.7767	-2.90472		BR	Parnaiba	Boca do priquito	TRUE	TRUE	TRUE	TRUE	TRUE	TRUE	TRUE	TRUE	TRUE	TRUE
1538	1086972241	Avicennia	germinans	Avicennia germinans	-41.7767	-2.90472		BR	Parnaiba	Canto do Vieira	TRUE	TRUE	TRUE	TRUE	TRUE	TRUE	TRUE	TRUE	TRUE	TRUE
1539	1086972236	Avicennia	germinans	Avicennia germinans	-41.7767	-2.90472		BR	Parnaiba	Ilha Frande de Santa Isabel	TRUE	TRUE	TRUE	TRUE	TRUE	TRUE	TRUE	TRUE	TRUE	TRUE
1540	1087001363	Avicennia	germinans	Avicennia germinans	-40.8339	-21.0111		BR	Itapemirim		TRUE	TRUE	TRUE	TRUE	TRUE	TRUE	TRUE	TRUE	TRUE	TRUE
1541	1077268998	Avicennia	germinans	Avicennia germinans	-40.3378	-20.3194		BR	VitÃ³ria	Campus UFES, Campus UFES - VitÃ³ria - ES.	TRUE	TRUE	TRUE	TRUE	TRUE	TRUE	TRUE	TRUE	TRUE	TRUE
1542	1087580813	Avicennia	germinans	Avicennia germinans	-40.3378	-20.3194	SOUTH_AMERICA	BR	VitÃ³ria	Campus UFES	TRUE	TRUE	TRUE	TRUE	TRUE	TRUE	TRUE	TRUE	TRUE	TRUE
1543	29476	Avicennia	germinans	Avicennia germinans	-39.8	-17.5	Southern America	Brazil	AlcobaÃ§a	EstuÃ¡rio do Rio ItanhÃ©m.	TRUE	TRUE	TRUE	TRUE	TRUE	TRUE	TRUE	TRUE	TRUE	TRUE
1544	1077200008	Avicennia	germinans	Avicennia germinans	-39.8	-17.5	SOUTH_AMERICA	BR	AlcobaÃ§a	EstuÃ¡rio do Rio ItanhÃ©m.	TRUE	TRUE	TRUE	TRUE	TRUE	TRUE	TRUE	TRUE	TRUE	TRUE
1545	1077197622	Avicennia	germinans	Avicennia germinans	-39.5508	-18.0864	SOUTH_AMERICA	BR	MucurÃ­		TRUE	TRUE	TRUE	TRUE	TRUE	TRUE	TRUE	TRUE	TRUE	TRUE
1546	1077199074	Avicennia	germinans	Avicennia germinans	-39.5508	-18.0864	SOUTH_AMERICA	BR	MucurÃ­		TRUE	TRUE	TRUE	TRUE	TRUE	TRUE	TRUE	TRUE	TRUE	TRUE
1547	1050665523	Avicennia	germinans	Avicennia germinans	-39.3981	-17.7981		BR	Caravelas	Extremo Sul da Bahia. Rio do Cupido, complexo estuarino Caravelas - Nova ViÃ§osa.	TRUE	TRUE	TRUE	TRUE	TRUE	TRUE	TRUE	TRUE	TRUE	TRUE
1548	32832	Avicennia	germinans	Avicennia germinans	-39.25	-15.2833	Southern America	Brazil	Prado		TRUE	TRUE	TRUE	TRUE	TRUE	TRUE	TRUE	TRUE	TRUE	TRUE
1549	58470	Avicennia	germinans	Avicennia germinans	-39.0772	-14.7906	Southern America	Brazil	IlhÃ©us	Mata da EsperanÃ§a.	TRUE	TRUE	TRUE	TRUE	TRUE	TRUE	TRUE	TRUE	TRUE	TRUE
1550	1077215415	Avicennia	germinans	Avicennia germinans	-39.0772	-14.7906	SOUTH_AMERICA	BR	IlhÃ©us	Mata da EsperanÃ§a.	TRUE	TRUE	TRUE	TRUE	TRUE	TRUE	TRUE	TRUE	TRUE	TRUE
1551	1077577474	Avicennia	germinans	Avicennia germinans	-39.05	-14.7833	SOUTH_AMERICA	BR	IlhÃ©us	Mata da EsperanÃ§a, Ã¡rea de mangue prÃ³ximo a entrada para represa.	TRUE	TRUE	TRUE	TRUE	TRUE	TRUE	TRUE	TRUE	TRUE	TRUE
1556	1077194193	Avicennia	germinans	Avicennia germinans	-38.3272	-12.8944	SOUTH_AMERICA	BR	Lauro de Freitas	Rio JacuÃ­pe.	TRUE	TRUE	TRUE	TRUE	TRUE	TRUE	TRUE	TRUE	TRUE	TRUE
1557	1077216975	Avicennia	germinans	Avicennia germinans	-37.6	-11.8	SOUTH_AMERICA	BR	Conde	Litoral Norte, Ilhas das Ostras, Rio CrumaÃ­	TRUE	TRUE	TRUE	TRUE	TRUE	TRUE	TRUE	TRUE	TRUE	TRUE
1558	1077217206	Avicennia	germinans	Avicennia germinans	-37.6	-11.8	SOUTH_AMERICA	BR	Conde	Litoral Norte, antes do Rio CrumaÃ­	TRUE	TRUE	TRUE	TRUE	TRUE	TRUE	TRUE	TRUE	TRUE	TRUE
1559	1077581470	Avicennia	germinans	Avicennia germinans	-37.3442	-5.1875	SOUTH_AMERICA	BR	MossorÃ³		TRUE	TRUE	TRUE	TRUE	TRUE	TRUE	TRUE	TRUE	TRUE	TRUE
1560	1087667967	Avicennia	germinans	Avicennia germinans	-37.3106	-10.9981	SOUTH_AMERICA	BR	Itaporanga d'Ajuda	Km 10. BR - 101	TRUE	TRUE	TRUE	TRUE	TRUE	TRUE	TRUE	TRUE	TRUE	TRUE
1561	1087665300	Avicennia	germinans	Avicennia germinans	-37.2064	-11.0147	SOUTH_AMERICA	BR	SÃ£o CristÃ³vÃ£o	pov. Rita Cacete	TRUE	TRUE	TRUE	TRUE	TRUE	TRUE	TRUE	TRUE	TRUE	TRUE
1562	1087666451	Avicennia	germinans	Avicennia germinans	-37.2064	-11.0147	SOUTH_AMERICA	BR	SÃ£o CristÃ³vÃ£o	Rio Vaza-Barris	TRUE	TRUE	TRUE	TRUE	TRUE	TRUE	TRUE	TRUE	TRUE	TRUE
1563	1077521727	Avicennia	germinans	Avicennia germinans	-37.1369	-4.95611	SOUTH_AMERICA	BR	Areia Branca	margem do mangue, prÃ³ximo foz do Rio MossorÃ³.	TRUE	TRUE	TRUE	TRUE	TRUE	TRUE	TRUE	TRUE	TRUE	TRUE
1564	1087665006	Avicennia	germinans	Avicennia germinans	-37.0544	-10.7889	SOUTH_AMERICA	BR	Santo Amaro das Brotas	Papagaio	TRUE	TRUE	TRUE	TRUE	TRUE	TRUE	TRUE	TRUE	TRUE	TRUE
1565	1087667612	Avicennia	germinans	Avicennia germinans	-37.0386	-10.9089	SOUTH_AMERICA	BR	Barra dos Coqueiros		TRUE	TRUE	TRUE	TRUE	TRUE	TRUE	TRUE	TRUE	TRUE	TRUE
1566	1087667606	Avicennia	germinans	Avicennia germinans	-37.0386	-10.9089	SOUTH_AMERICA	BR	Barra dos Coqueiros		TRUE	TRUE	TRUE	TRUE	TRUE	TRUE	TRUE	TRUE	TRUE	TRUE
1567	1087667413	Avicennia	germinans	Avicennia germinans	-36.8558	-10.7378	SOUTH_AMERICA	BR	Pirambu		TRUE	TRUE	TRUE	TRUE	TRUE	TRUE	TRUE	TRUE	TRUE	TRUE
1568	1087668536	Avicennia	germinans	Avicennia germinans	-36.4661	-10.4294	SOUTH_AMERICA	BR	Brejo Grande	Pov. CabeÃ§a	TRUE	TRUE	TRUE	TRUE	TRUE	TRUE	TRUE	TRUE	TRUE	TRUE
1569	1087059069	Avicennia	germinans	Avicennia germinans	-35.5072	-9.40472		BR	Barra de Santo Antonio		TRUE	TRUE	TRUE	TRUE	TRUE	TRUE	TRUE	TRUE	TRUE	TRUE
1570	1087046379	Avicennia	germinans	Avicennia germinans	-35.1586	-8.66361		BR	Rio Formoso	Mangue do Mamucabinha	TRUE	TRUE	TRUE	TRUE	TRUE	TRUE	TRUE	TRUE	TRUE	TRUE
1571	1087045865	Avicennia	germinans	Avicennia germinans	-35.035	-8.28667		BR	Cabo de Santo Agostinho	Ponte dos Carvalhos-BR-101.	TRUE	TRUE	TRUE	TRUE	TRUE	TRUE	TRUE	TRUE	TRUE	TRUE
1572	1077525549	Avicennia	germinans	Avicennia germinans	-35.0025	-7.56056	SOUTH_AMERICA	BR	Goiana	margem do canal, na direÃ§Ã£o do mar.	TRUE	TRUE	TRUE	TRUE	TRUE	TRUE	TRUE	TRUE	TRUE	TRUE
1573	1077580284	Avicennia	germinans	Avicennia germinans	-34.9372	-8.2375	SOUTH_AMERICA	BR	JaboatÃ£o dos Guararapes	Barra de Jangada	TRUE	TRUE	TRUE	TRUE	TRUE	TRUE	TRUE	TRUE	TRUE	TRUE
1574	1077546980	Avicennia	germinans	Avicennia germinans	-34.8811	-8.05389	SOUTH_AMERICA	BR	Recife	Dois IrmÃ£os	TRUE	TRUE	TRUE	TRUE	TRUE	TRUE	TRUE	TRUE	TRUE	TRUE
1575	1077511032	Avicennia	germinans	Avicennia germinans	-34.8811	-8.05389	SOUTH_AMERICA	BR	Recife	Parnamirim, mangues.	TRUE	TRUE	TRUE	TRUE	TRUE	TRUE	TRUE	TRUE	TRUE	TRUE
1581	997605252	Avicennia	germinans	Avicennia germinans	-16.32	12.5		SN		Casamance, pr. Ziguinchor	TRUE	TRUE	TRUE	TRUE	TRUE	TRUE	TRUE	TRUE	TRUE	TRUE
1582	1019295741	Avicennia	germinans	Avicennia germinans	-16.2149	16.5385		MR	KeurMacene	PND (Mangrove de Dar Essalama)	TRUE	TRUE	TRUE	TRUE	TRUE	TRUE	TRUE	TRUE	TRUE	TRUE
1583	197016001	Avicennia	germinans	Avicennia germinans	-14.604	10.608		GN		Kamsar	TRUE	TRUE	TRUE	TRUE	TRUE	TRUE	TRUE	TRUE	TRUE	TRUE
1584	197016002	Avicennia	germinans	Avicennia germinans	-14.568	10.622		GN		Kamsar	TRUE	TRUE	TRUE	TRUE	TRUE	TRUE	TRUE	TRUE	TRUE	TRUE
1585	197016000	Avicennia	germinans	Avicennia germinans	-14.559	10.735		GN		Kamsar	TRUE	TRUE	TRUE	TRUE	TRUE	TRUE	TRUE	TRUE	TRUE	TRUE
1586	197015999	Avicennia	germinans	Avicennia germinans	-14.523	10.622		GN		Kamsar	TRUE	TRUE	TRUE	TRUE	TRUE	TRUE	TRUE	TRUE	TRUE	TRUE
1588	1020335080	Avicennia	germinans	Avicennia germinans	-11.3452	6.78367	AFRICA	LR			TRUE	TRUE	TRUE	TRUE	TRUE	TRUE	TRUE	TRUE	TRUE	TRUE
1601	1023635142	Avicennia	germinans	Avicennia germinans	-6.43333	4.81667	AFRICA	CI			TRUE	TRUE	TRUE	TRUE	TRUE	TRUE	TRUE	TRUE	TRUE	TRUE
1602	1020340967	Avicennia	germinans	Avicennia germinans	-6.43333	4.81667	AFRICA	CI			TRUE	TRUE	TRUE	TRUE	TRUE	TRUE	TRUE	TRUE	TRUE	TRUE
1603	1020340993	Avicennia	germinans	Avicennia germinans	-6.43333	4.81667	AFRICA	CI			TRUE	TRUE	TRUE	TRUE	TRUE	TRUE	TRUE	TRUE	TRUE	TRUE
1604	1020340932	Avicennia	germinans	Avicennia germinans	-6.1	4.96667	AFRICA	CI			TRUE	TRUE	TRUE	TRUE	TRUE	TRUE	TRUE	TRUE	TRUE	TRUE
1605	1020307130	Avicennia	germinans	Avicennia germinans	-3.78333	5.26667	AFRICA	CI			TRUE	TRUE	TRUE	TRUE	TRUE	TRUE	TRUE	TRUE	TRUE	TRUE
1606	1020176331	Avicennia	germinans	Avicennia germinans	-3.78333	5.26667	AFRICA	CI			TRUE	TRUE	TRUE	TRUE	TRUE	TRUE	TRUE	TRUE	TRUE	TRUE
1607	1020340969	Avicennia	germinans	Avicennia germinans	-3.75	5.23333	AFRICA	CI			TRUE	TRUE	TRUE	TRUE	TRUE	TRUE	TRUE	TRUE	TRUE	TRUE
1608	1020340940	Avicennia	germinans	Avicennia germinans	-3.75	5.23333	AFRICA	CI			TRUE	TRUE	TRUE	TRUE	TRUE	TRUE	TRUE	TRUE	TRUE	TRUE
1609	1020340961	Avicennia	germinans	Avicennia germinans	-3.75	5.23333	AFRICA	CI			TRUE	TRUE	TRUE	TRUE	TRUE	TRUE	TRUE	TRUE	TRUE	TRUE
1610	1020138578	Avicennia	germinans	Avicennia germinans	-1.95	4.8	AFRICA	GH			TRUE	TRUE	TRUE	TRUE	TRUE	TRUE	TRUE	TRUE	TRUE	TRUE
1611	1020340408	Avicennia	germinans	Avicennia germinans	-1.95	4.8	AFRICA	GH			TRUE	TRUE	TRUE	TRUE	TRUE	TRUE	TRUE	TRUE	TRUE	TRUE
1612	250736463	Avicennia	germinans	Avicennia germinans	-1.95	4.8		GH			TRUE	TRUE	TRUE	TRUE	TRUE	TRUE	TRUE	TRUE	TRUE	TRUE
1613	250736462	Avicennia	germinans	Avicennia germinans	-1.95	4.8		GH			TRUE	TRUE	TRUE	TRUE	TRUE	TRUE	TRUE	TRUE	TRUE	TRUE
1618	1020367021	Avicennia	germinans	Avicennia germinans	-1.0675	5.19283	AFRICA	GH			TRUE	TRUE	TRUE	TRUE	TRUE	TRUE	TRUE	TRUE	TRUE	TRUE
1622	1020340923	Avicennia	germinans	Avicennia germinans	-0.1	5.58333	AFRICA	GH			TRUE	TRUE	TRUE	TRUE	TRUE	TRUE	TRUE	TRUE	TRUE	TRUE
1627	1020067803	Avicennia	germinans	Avicennia germinans	0.62833	5.78167	AFRICA	GH			TRUE	TRUE	TRUE	TRUE	TRUE	TRUE	TRUE	TRUE	TRUE	TRUE
1628	250736423	Avicennia	germinans	Avicennia germinans	0.62833	5.78167		GH			TRUE	TRUE	TRUE	TRUE	TRUE	TRUE	TRUE	TRUE	TRUE	TRUE
1629	319179383	Avicennia	germinans	Avicennia germinans	0.63	5.78	AFRICA	GH		Beach near Ada.	TRUE	TRUE	TRUE	TRUE	TRUE	TRUE	TRUE	TRUE	TRUE	TRUE
1632	250736479	Avicennia	germinans	Avicennia germinans	1.59	6.35		BJ		Bopa	TRUE	TRUE	TRUE	TRUE	TRUE	TRUE	TRUE	TRUE	TRUE	TRUE
1633	1020253552	Avicennia	germinans	Avicennia germinans	1.8051	6.28135	AFRICA	BJ			TRUE	TRUE	TRUE	TRUE	TRUE	TRUE	TRUE	TRUE	TRUE	TRUE
1634	1020324920	Avicennia	germinans	Avicennia germinans	1.8051	6.28135	AFRICA	BJ			TRUE	TRUE	TRUE	TRUE	TRUE	TRUE	TRUE	TRUE	TRUE	TRUE
1635	883347907	Avicennia	germinans	Avicennia germinans	1.8333	6.4833	AFRICA	BJ	HouÃ©yogbÃ©	Zoungbonou	TRUE	TRUE	TRUE	TRUE	TRUE	TRUE	TRUE	TRUE	TRUE	TRUE
1636	883347859	Avicennia	germinans	Avicennia germinans	1.8333	6.2833	AFRICA	BJ	Grand-Popo	Grand Popo	TRUE	TRUE	TRUE	TRUE	TRUE	TRUE	TRUE	TRUE	TRUE	TRUE
1637	1020251746	Avicennia	germinans	Avicennia germinans	1.83333	6.55	AFRICA	BJ			TRUE	TRUE	TRUE	TRUE	TRUE	TRUE	TRUE	TRUE	TRUE	TRUE
1638	1020324291	Avicennia	germinans	Avicennia germinans	1.9	6.3	AFRICA	BJ			TRUE	TRUE	TRUE	TRUE	TRUE	TRUE	TRUE	TRUE	TRUE	TRUE
1639	894169326	Avicennia	germinans	Avicennia germinans	1.9	6.3		BJ		Grand-Popo	TRUE	TRUE	TRUE	TRUE	TRUE	TRUE	TRUE	TRUE	TRUE	TRUE
1640	1020251796	Avicennia	germinans	Avicennia germinans	1.9	6.3	AFRICA	BJ			TRUE	TRUE	TRUE	TRUE	TRUE	TRUE	TRUE	TRUE	TRUE	TRUE
1641	1020324313	Avicennia	germinans	Avicennia germinans	1.96667	6.58333	AFRICA	BJ			TRUE	TRUE	TRUE	TRUE	TRUE	TRUE	TRUE	TRUE	TRUE	TRUE
1642	1020251760	Avicennia	germinans	Avicennia germinans	1.96667	6.58333	AFRICA	BJ			TRUE	TRUE	TRUE	TRUE	TRUE	TRUE	TRUE	TRUE	TRUE	TRUE
1643	1020129668	Avicennia	germinans	Avicennia germinans	1.96717	6.55567	AFRICA	BJ			TRUE	TRUE	TRUE	TRUE	TRUE	TRUE	TRUE	TRUE	TRUE	TRUE
1644	250736453	Avicennia	germinans	Avicennia germinans	1.96717	6.55567		BJ			TRUE	TRUE	TRUE	TRUE	TRUE	TRUE	TRUE	TRUE	TRUE	TRUE
1645	250736454	Avicennia	germinans	Avicennia germinans	1.96717	6.55567		BJ			TRUE	TRUE	TRUE	TRUE	TRUE	TRUE	TRUE	TRUE	TRUE	TRUE
1646	894169832	Avicennia	germinans	Avicennia germinans	1.983	6.583		BJ		Bopa	TRUE	TRUE	TRUE	TRUE	TRUE	TRUE	TRUE	TRUE	TRUE	TRUE
1647	883347884	Avicennia	germinans	Avicennia germinans	1.9833	6.5833	AFRICA	BJ	Bopa	Bopa	TRUE	TRUE	TRUE	TRUE	TRUE	TRUE	TRUE	TRUE	TRUE	TRUE
1648	894168754	Avicennia	germinans	Avicennia germinans	2.083	6.316		BJ		Ouidah	TRUE	TRUE	TRUE	TRUE	TRUE	TRUE	TRUE	TRUE	TRUE	TRUE
1649	1020263110	Avicennia	germinans	Avicennia germinans	2.08333	6.33333	AFRICA	BJ			TRUE	TRUE	TRUE	TRUE	TRUE	TRUE	TRUE	TRUE	TRUE	TRUE
1650	1020107791	Avicennia	germinans	Avicennia germinans	2.08333	6.33333	AFRICA	BJ			TRUE	TRUE	TRUE	TRUE	TRUE	TRUE	TRUE	TRUE	TRUE	TRUE
1651	1020343650	Avicennia	germinans	Avicennia germinans	2.08333	6.31667	AFRICA	BJ			TRUE	TRUE	TRUE	TRUE	TRUE	TRUE	TRUE	TRUE	TRUE	TRUE
1652	883347932	Avicennia	germinans	Avicennia germinans	2.1	6.3166	AFRICA	BJ	Ouidah	Lagune Ouidah	TRUE	TRUE	TRUE	TRUE	TRUE	TRUE	TRUE	TRUE	TRUE	TRUE
1653	883347951	Avicennia	germinans	Avicennia germinans	2.2	6.35	AFRICA	BJ	Ouidah	AvlÃ©kÃ©tÃ©	TRUE	TRUE	TRUE	TRUE	TRUE	TRUE	TRUE	TRUE	TRUE	TRUE
1658	137502074	Avicennia	germinans	Avicennia germinans	8.53	3.46		GQ		Bioco, Luba - Veiga y AvendaÃ±o, km 2	TRUE	TRUE	TRUE	TRUE	TRUE	TRUE	TRUE	TRUE	TRUE	TRUE
1659	1020216122	Avicennia	germinans	Avicennia germinans	8.55	3.46667	AFRICA	GQ			TRUE	TRUE	TRUE	TRUE	TRUE	TRUE	TRUE	TRUE	TRUE	TRUE
1660	250736520	Avicennia	germinans	Avicennia germinans	8.55	3.46667		GQ			TRUE	TRUE	TRUE	TRUE	TRUE	TRUE	TRUE	TRUE	TRUE	TRUE
1661	250736519	Avicennia	germinans	Avicennia germinans	8.55	3.46667		GQ			TRUE	TRUE	TRUE	TRUE	TRUE	TRUE	TRUE	TRUE	TRUE	TRUE
1670	250736480	Avicennia	germinans	Avicennia germinans	8.76667	-0.71667		GA			TRUE	TRUE	TRUE	TRUE	TRUE	TRUE	TRUE	TRUE	TRUE	TRUE
1671	1020061365	Avicennia	germinans	Avicennia germinans	8.78333	-0.71667	AFRICA	GA			TRUE	TRUE	TRUE	TRUE	TRUE	TRUE	TRUE	TRUE	TRUE	TRUE
1672	250736443	Avicennia	germinans	Avicennia germinans	8.78333	-0.71667		GA			TRUE	TRUE	TRUE	TRUE	TRUE	TRUE	TRUE	TRUE	TRUE	TRUE
1673	319179323	Avicennia	germinans	Avicennia germinans	8.95	4.57	AFRICA	CM		Mangrove forests in the Rio del Rey, west of Ekondo Titi.	TRUE	TRUE	TRUE	TRUE	TRUE	TRUE	TRUE	TRUE	TRUE	TRUE
1674	1020340957	Avicennia	germinans	Avicennia germinans	8.95	4.56667	AFRICA	CM			TRUE	TRUE	TRUE	TRUE	TRUE	TRUE	TRUE	TRUE	TRUE	TRUE
1699	1020162832	Avicennia	germinans	Avicennia germinans	9.36056	-0.04	AFRICA	GA			TRUE	TRUE	TRUE	TRUE	TRUE	TRUE	TRUE	TRUE	TRUE	TRUE
1700	250736486	Avicennia	germinans	Avicennia germinans	9.36667	-0.03333		GA			TRUE	TRUE	TRUE	TRUE	TRUE	TRUE	TRUE	TRUE	TRUE	TRUE
1701	250736487	Avicennia	germinans	Avicennia germinans	9.36667	-0.03333		GA			TRUE	TRUE	TRUE	TRUE	TRUE	TRUE	TRUE	TRUE	TRUE	TRUE
1702	250736488	Avicennia	germinans	Avicennia germinans	9.36667	-0.03333		GA			TRUE	TRUE	TRUE	TRUE	TRUE	TRUE	TRUE	TRUE	TRUE	TRUE
1717	319180150	Avicennia	germinans	Avicennia germinans	9.5	-1.93	AFRICA	GA		Parc National Loango. Obiro 550m avant la maison de Solo.. Marecage inondable espece dominante: Hibiscus, fougeres geant, paletuvier rouge.	TRUE	TRUE	TRUE	TRUE	TRUE	TRUE	TRUE	TRUE	TRUE	TRUE
1718	250736494	Avicennia	germinans	Avicennia germinans	9.50333	-1.93467		GA			TRUE	TRUE	TRUE	TRUE	TRUE	TRUE	TRUE	TRUE	TRUE	TRUE
1719	1020290309	Avicennia	germinans	Avicennia germinans	9.50333	-1.93467	AFRICA	GA			TRUE	TRUE	TRUE	TRUE	TRUE	TRUE	TRUE	TRUE	TRUE	TRUE
1720	250736496	Avicennia	germinans	Avicennia germinans	9.50333	-1.93467		GA			TRUE	TRUE	TRUE	TRUE	TRUE	TRUE	TRUE	TRUE	TRUE	TRUE
1721	1020172720	Avicennia	germinans	Avicennia germinans	9.50333	-1.93467	AFRICA	GA			TRUE	TRUE	TRUE	TRUE	TRUE	TRUE	TRUE	TRUE	TRUE	TRUE
1722	250736497	Avicennia	germinans	Avicennia germinans	9.50333	-1.93467		GA			TRUE	TRUE	TRUE	TRUE	TRUE	TRUE	TRUE	TRUE	TRUE	TRUE
1723	250736495	Avicennia	germinans	Avicennia germinans	9.50333	-1.93467		GA			TRUE	TRUE	TRUE	TRUE	TRUE	TRUE	TRUE	TRUE	TRUE	TRUE
1724	250736498	Avicennia	germinans	Avicennia germinans	9.50333	-1.93467		GA			TRUE	TRUE	TRUE	TRUE	TRUE	TRUE	TRUE	TRUE	TRUE	TRUE
1725	1020057873	Avicennia	germinans	Avicennia germinans	9.51667	0.48333	AFRICA	GA			TRUE	TRUE	TRUE	TRUE	TRUE	TRUE	TRUE	TRUE	TRUE	TRUE
1726	1020285055	Avicennia	germinans	Avicennia germinans	9.51667	0.48333	AFRICA	GA			TRUE	TRUE	TRUE	TRUE	TRUE	TRUE	TRUE	TRUE	TRUE	TRUE
1727	250736426	Avicennia	germinans	Avicennia germinans	9.51667	0.48333		GA			TRUE	TRUE	TRUE	TRUE	TRUE	TRUE	TRUE	TRUE	TRUE	TRUE
1728	1020147686	Avicennia	germinans	Avicennia germinans	9.5185	0.481	AFRICA	GA			TRUE	TRUE	TRUE	TRUE	TRUE	TRUE	TRUE	TRUE	TRUE	TRUE
1729	250736499	Avicennia	germinans	Avicennia germinans	9.5185	0.481		GA			TRUE	TRUE	TRUE	TRUE	TRUE	TRUE	TRUE	TRUE	TRUE	TRUE
1730	1020284481	Avicennia	germinans	Avicennia germinans	9.5185	0.481	AFRICA	GA			TRUE	TRUE	TRUE	TRUE	TRUE	TRUE	TRUE	TRUE	TRUE	TRUE
1731	250736476	Avicennia	germinans	Avicennia germinans	9.5185	0.481		GA			TRUE	TRUE	TRUE	TRUE	TRUE	TRUE	TRUE	TRUE	TRUE	TRUE
1732	1020406614	Avicennia	germinans	Avicennia germinans	9.54278	0.60478	AFRICA	GA			TRUE	TRUE	TRUE	TRUE	TRUE	TRUE	TRUE	TRUE	TRUE	TRUE
1735	1020340443	Avicennia	germinans	Avicennia germinans	9.81667	3.95	AFRICA	CM			TRUE	TRUE	TRUE	TRUE	TRUE	TRUE	TRUE	TRUE	TRUE	TRUE
1736	250736408	Avicennia	germinans	Avicennia germinans	9.81667	3.95		CM			TRUE	TRUE	TRUE	TRUE	TRUE	TRUE	TRUE	TRUE	TRUE	TRUE
1737	250736411	Avicennia	germinans	Avicennia germinans	9.81667	3.95		CM			TRUE	TRUE	TRUE	TRUE	TRUE	TRUE	TRUE	TRUE	TRUE	TRUE
1738	250736402	Avicennia	germinans	Avicennia germinans	9.81667	3.95		CM			TRUE	TRUE	TRUE	TRUE	TRUE	TRUE	TRUE	TRUE	TRUE	TRUE
1739	250736400	Avicennia	germinans	Avicennia germinans	9.81667	3.95		CM			TRUE	TRUE	TRUE	TRUE	TRUE	TRUE	TRUE	TRUE	TRUE	TRUE
1740	1020340409	Avicennia	germinans	Avicennia germinans	9.81667	3.95	AFRICA	CM			TRUE	TRUE	TRUE	TRUE	TRUE	TRUE	TRUE	TRUE	TRUE	TRUE
1741	1020113900	Avicennia	germinans	Avicennia germinans	9.81667	3.95	AFRICA	CM			TRUE	TRUE	TRUE	TRUE	TRUE	TRUE	TRUE	TRUE	TRUE	TRUE
1742	250736397	Avicennia	germinans	Avicennia germinans	9.81667	3.95		CM			TRUE	TRUE	TRUE	TRUE	TRUE	TRUE	TRUE	TRUE	TRUE	TRUE
1743	250736401	Avicennia	germinans	Avicennia germinans	9.81667	3.95		CM			TRUE	TRUE	TRUE	TRUE	TRUE	TRUE	TRUE	TRUE	TRUE	TRUE
1744	250736398	Avicennia	germinans	Avicennia germinans	9.81667	3.95		CM			TRUE	TRUE	TRUE	TRUE	TRUE	TRUE	TRUE	TRUE	TRUE	TRUE
1745	250736404	Avicennia	germinans	Avicennia germinans	9.81667	3.95		CM			TRUE	TRUE	TRUE	TRUE	TRUE	TRUE	TRUE	TRUE	TRUE	TRUE
1746	250736403	Avicennia	germinans	Avicennia germinans	9.81667	3.95		CM			TRUE	TRUE	TRUE	TRUE	TRUE	TRUE	TRUE	TRUE	TRUE	TRUE
1747	250736399	Avicennia	germinans	Avicennia germinans	9.81667	3.95		CM			TRUE	TRUE	TRUE	TRUE	TRUE	TRUE	TRUE	TRUE	TRUE	TRUE
1748	250736405	Avicennia	germinans	Avicennia germinans	9.81667	3.95		CM			TRUE	TRUE	TRUE	TRUE	TRUE	TRUE	TRUE	TRUE	TRUE	TRUE
1749	250736407	Avicennia	germinans	Avicennia germinans	9.81667	3.95		CM			TRUE	TRUE	TRUE	TRUE	TRUE	TRUE	TRUE	TRUE	TRUE	TRUE
1750	250736410	Avicennia	germinans	Avicennia germinans	9.81667	3.95		CM			TRUE	TRUE	TRUE	TRUE	TRUE	TRUE	TRUE	TRUE	TRUE	TRUE
1751	250736406	Avicennia	germinans	Avicennia germinans	9.81667	3.95		CM			TRUE	TRUE	TRUE	TRUE	TRUE	TRUE	TRUE	TRUE	TRUE	TRUE
1752	250736409	Avicennia	germinans	Avicennia germinans	9.81667	3.95		CM			TRUE	TRUE	TRUE	TRUE	TRUE	TRUE	TRUE	TRUE	TRUE	TRUE
1753	250736412	Avicennia	germinans	Avicennia germinans	9.81667	3.95		CM			TRUE	TRUE	TRUE	TRUE	TRUE	TRUE	TRUE	TRUE	TRUE	TRUE
1754	250736523	Avicennia	germinans	Avicennia germinans	9.82167	2.37333		CM		Campo-Ma'an area, Campo	TRUE	TRUE	TRUE	TRUE	TRUE	TRUE	TRUE	TRUE	TRUE	TRUE
1755	250736524	Avicennia	germinans	Avicennia germinans	9.82167	2.37333		CM		Campo-Ma'an area, Campo	TRUE	TRUE	TRUE	TRUE	TRUE	TRUE	TRUE	TRUE	TRUE	TRUE
1756	1020234512	Avicennia	germinans	Avicennia germinans	9.82167	2.37333	AFRICA	CM			TRUE	TRUE	TRUE	TRUE	TRUE	TRUE	TRUE	TRUE	TRUE	TRUE
1757	250736521	Avicennia	germinans	Avicennia germinans	9.82167	2.37333		CM		Campo-Ma'an area, Campo	TRUE	TRUE	TRUE	TRUE	TRUE	TRUE	TRUE	TRUE	TRUE	TRUE
1758	250736522	Avicennia	germinans	Avicennia germinans	9.82167	2.37333		CM		Campo-Ma'an area, Campo	TRUE	TRUE	TRUE	TRUE	TRUE	TRUE	TRUE	TRUE	TRUE	TRUE
1759	250736428	Avicennia	germinans	Avicennia germinans	9.9	2.95		CM		Kribi	TRUE	TRUE	TRUE	TRUE	TRUE	TRUE	TRUE	TRUE	TRUE	TRUE
1760	250736429	Avicennia	germinans	Avicennia germinans	9.9	2.95		CM		Kribi	TRUE	TRUE	TRUE	TRUE	TRUE	TRUE	TRUE	TRUE	TRUE	TRUE
1761	1020088746	Avicennia	germinans	Avicennia germinans	9.9	2.95	AFRICA	CM			TRUE	TRUE	TRUE	TRUE	TRUE	TRUE	TRUE	TRUE	TRUE	TRUE
1762	1020405563	Avicennia	germinans	Avicennia germinans	11.8161	-4.71156	AFRICA	CG			TRUE	TRUE	TRUE	TRUE	TRUE	TRUE	TRUE	TRUE	TRUE	TRUE
1765	23224	Avicennia	germinans	Avicennia germinans	-34.8631	-7.115	Southern America	Brazil	JoÃ£o Pessoa	Laguna do GraÃº	TRUE	TRUE	TRUE	TRUE	TRUE	TRUE	TRUE	TRUE	TRUE	TRUE
1766	23224	Avicennia	germinans	Avicennia germinans	-34.8631	-7.115	Southern America	Brazil	JoÃ£o Pessoa	Laguna do GraÃº	TRUE	TRUE	TRUE	TRUE	TRUE	TRUE	TRUE	TRUE	TRUE	TRUE
1767	87014	Avicennia	germinans	Avicennia germinans	-34.9372	-8.2375	Southern America	Brazil	JaboatÃ£o dos Guararapes	Barra de Jangada	TRUE	TRUE	TRUE	TRUE	TRUE	TRUE	TRUE	TRUE	TRUE	TRUE
1768	100822	Avicennia	germinans	Avicennia germinans	-35.0115	-8.52544		Brazil	Ipojuca	trilha para MaracaÃ­pe	TRUE	TRUE	TRUE	TRUE	TRUE	TRUE	TRUE	TRUE	TRUE	TRUE
1769	100822	Avicennia	germinans	Avicennia germinans	-35.0115	-8.52544		Brazil	Ipojuca	Trilha para MaracaÃ­pe, 0-1 msm.	TRUE	TRUE	TRUE	TRUE	TRUE	TRUE	TRUE	TRUE	TRUE	TRUE
1770	95551	Avicennia	germinans	Avicennia germinans	-35.0192	-8.50403		Brazil	Ipojuca	Ao longo da estrada para P. de Galinhas, 0-1 msm.	TRUE	TRUE	TRUE	TRUE	TRUE	TRUE	TRUE	TRUE	TRUE	TRUE
1771	95551	Avicennia	germinans	Avicennia germinans	-35.0192	-8.50403		Brazil	Ipojuca	ao longo da estrada para P. de Galinhas	TRUE	TRUE	TRUE	TRUE	TRUE	TRUE	TRUE	TRUE	TRUE	TRUE
1772	100823	Avicennia	germinans	Avicennia germinans	-35.0577	-8.58486		Brazil	TamandarÃ©	ao longo do rio da Barra	TRUE	TRUE	TRUE	TRUE	TRUE	TRUE	TRUE	TRUE	TRUE	TRUE
1773	100823	Avicennia	germinans	Avicennia germinans	-35.0577	-8.58486		Brazil	TamandarÃ©	Ao longo do rio da Barra, 0-1 msm.	TRUE	TRUE	TRUE	TRUE	TRUE	TRUE	TRUE	TRUE	TRUE	TRUE
1774	7797	Avicennia	germinans	Avicennia germinans	-35.1258	-6.83889	Southern America	Brazil	Mamanguape	margen esquerda do Rio Mamanguape.	TRUE	TRUE	TRUE	TRUE	TRUE	TRUE	TRUE	TRUE	TRUE	TRUE
1775	3726	Avicennia	germinans	Avicennia germinans	-35.2583	-5.88333	AmÃ©rica do Sul	Brazil	Natal	SÃ­tio Vila Velha, IgapÃ³.	TRUE	TRUE	TRUE	TRUE	TRUE	TRUE	TRUE	TRUE	TRUE	TRUE
1777	71	Avicennia	germinans	Avicennia germinans	-36.5772	-10.5419	Atlantic Ocean	Brazil	Pacatuba	Rio Ponta dos Mangues	TRUE	TRUE	TRUE	TRUE	TRUE	TRUE	TRUE	TRUE	TRUE	TRUE
1778	74	Avicennia	germinans	Avicennia germinans	-36.6028	-10.5525	Atlantic Ocean	Brazil	Pacatuba	PoÃ§a dos Paus	TRUE	TRUE	TRUE	TRUE	TRUE	TRUE	TRUE	TRUE	TRUE	TRUE
1779	3044	Avicennia	germinans	Avicennia germinans	-36.8558	-10.7378	Southern America	Brazil	Pirambu		TRUE	TRUE	TRUE	TRUE	TRUE	TRUE	TRUE	TRUE	TRUE	TRUE
1781	62	Avicennia	germinans	Avicennia germinans	-36.8719	-10.7303	Atlantic Ocean	Brazil	Santo Amaro das Brotas	Rio Japaratuba	TRUE	TRUE	TRUE	TRUE	TRUE	TRUE	TRUE	TRUE	TRUE	TRUE
1782	50	Avicennia	germinans	Avicennia germinans	-37.0144	-10.8714	Atlantic Ocean	Brazil	Barra dos Coqueiros	Rio Pomonga	TRUE	TRUE	TRUE	TRUE	TRUE	TRUE	TRUE	TRUE	TRUE	TRUE
1783	3239	Avicennia	germinans	Avicennia germinans	-37.0386	-10.9089	Southern America	Brazil	Barra dos Coqueiros		TRUE	TRUE	TRUE	TRUE	TRUE	TRUE	TRUE	TRUE	TRUE	TRUE
1784	3238	Avicennia	germinans	Avicennia germinans	-37.0386	-10.9089	Southern America	Brazil	Barra dos Coqueiros		TRUE	TRUE	TRUE	TRUE	TRUE	TRUE	TRUE	TRUE	TRUE	TRUE
1785	43	Avicennia	germinans	Avicennia germinans	-37.0725	-10.8167	Atlantic Ocean	Brazil	Laranjeiras	Rio Sal	TRUE	TRUE	TRUE	TRUE	TRUE	TRUE	TRUE	TRUE	TRUE	TRUE
1786	5296	Avicennia	germinans	Avicennia germinans	-37.1369	-4.95611	AmÃ©rica do Sul	Brazil	Areia Branca	Foz do rio MossorÃ³.	TRUE	TRUE	TRUE	TRUE	TRUE	TRUE	TRUE	TRUE	TRUE	TRUE
1787	5302	Avicennia	germinans	Avicennia germinans	-37.1369	-4.95611	AmÃ©rica do Sul	Brazil	Areia Branca	Foz do rio MossorÃ³.	TRUE	TRUE	TRUE	TRUE	TRUE	TRUE	TRUE	TRUE	TRUE	TRUE
1788	4152	Avicennia	germinans	Avicennia germinans	-37.1487	-5		Brazil	Grossos	Salina Caenga	TRUE	TRUE	TRUE	TRUE	TRUE	TRUE	TRUE	TRUE	TRUE	TRUE
1789	33	Avicennia	germinans	Avicennia germinans	-37.2036	-11.0931	Atlantic Ocean	Brazil	Itaporanga d'Ajuda	Rio Vasa Barris	TRUE	TRUE	TRUE	TRUE	TRUE	TRUE	TRUE	TRUE	TRUE	TRUE
1790	25	Avicennia	germinans	Avicennia germinans	-37.2089	-11.0397	Atlantic Ocean	Brazil	Sao Cristovao	Rio Vasa Barris	TRUE	TRUE	TRUE	TRUE	TRUE	TRUE	TRUE	TRUE	TRUE	TRUE
1791	8	Avicennia	germinans	Avicennia germinans	-37.4456	-11.3897	Atlantic Ocean	Brazil	Santa Luzia do Itanhy	Rio Piaui	TRUE	TRUE	TRUE	TRUE	TRUE	TRUE	TRUE	TRUE	TRUE	TRUE
1792	61306	Avicennia	germinans	Avicennia germinans	-37.6	-11.8	Southern America	Brazil	Conde	Litoral Norte, Ilhas das Ostras, Rio CrumaÃ­	TRUE	TRUE	TRUE	TRUE	TRUE	TRUE	TRUE	TRUE	TRUE	TRUE
1793	61544	Avicennia	germinans	Avicennia germinans	-37.6	-11.8	Southern America	Brazil	Conde	Litoral Norte, antes do Rio CrumaÃ­	TRUE	TRUE	TRUE	TRUE	TRUE	TRUE	TRUE	TRUE	TRUE	TRUE
1794	573461	Avicennia	germinans	Avicennia germinans	-38.6531	-3.7361	South America	Brazil	Caucaia	Bordering tidal flats 2 km. east of Soure	TRUE	TRUE	TRUE	TRUE	TRUE	TRUE	TRUE	TRUE	TRUE	TRUE
1798	573459	Avicennia	germinans	Avicennia germinans	-38.9967	-14.2778	South America	Brazil	ItacarÃ©	ItacarÃ©	TRUE	TRUE	TRUE	TRUE	TRUE	TRUE	TRUE	TRUE	TRUE	TRUE
1801	84221	Avicennia	germinans	Avicennia germinans	-39.05	-14.7833	Southern America	Brazil	IlhÃ©us	Mata da EsperanÃ§a, Ã¡rea de mangue prÃ³ximo a entrada para represa.	TRUE	TRUE	TRUE	TRUE	TRUE	TRUE	TRUE	TRUE	TRUE	TRUE
1802	6891	Avicennia	germinans	Avicennia germinans	-39.05	-14.7906		Brazil	IlhÃ©us		TRUE	TRUE	TRUE	TRUE	TRUE	TRUE	TRUE	TRUE	TRUE	TRUE
1803	6968	Avicennia	germinans	Avicennia germinans	-39.05	-14.7833		Brazil	IlhÃ©us		TRUE	TRUE	TRUE	TRUE	TRUE	TRUE	TRUE	TRUE	TRUE	TRUE
1804	100059	Avicennia	germinans	Avicennia germinans	-39.0558	-3.41275		Brazil	Paracuru	Ao longo do manguezal de Paracuru, 0-1 msm.	TRUE	TRUE	TRUE	TRUE	TRUE	TRUE	TRUE	TRUE	TRUE	TRUE
1805	100059	Avicennia	germinans	Avicennia germinans	-39.0558	-3.41275		Brazil	Paracuru	ao longo do manguezal de Paracuru	TRUE	TRUE	TRUE	TRUE	TRUE	TRUE	TRUE	TRUE	TRUE	TRUE
1806	100059	Avicennia	germinans	Avicennia germinans	-39.0558	-3.41275		Brazil	Paracuru	Ao longo do manguezal de Paracuru, 0-1 msm.	TRUE	TRUE	TRUE	TRUE	TRUE	TRUE	TRUE	TRUE	TRUE	TRUE
1807	154243	Avicennia	germinans	Avicennia germinans	-39.0576	-3.41289		Brazil	Paracuru	ao longo do manguezal de Paracuru	TRUE	TRUE	TRUE	TRUE	TRUE	TRUE	TRUE	TRUE	TRUE	TRUE
1808	154243	Avicennia	germinans	Avicennia germinans	-39.0576	-3.41289		Brazil	Paracuru	Ao longo do manguezal de Paracuru, 0-1 msm.	TRUE	TRUE	TRUE	TRUE	TRUE	TRUE	TRUE	TRUE	TRUE	TRUE
1809	10554	Avicennia	germinans	Avicennia germinans	-39.0606	-14.7956		Brazil	IlhÃ©us		TRUE	TRUE	TRUE	TRUE	TRUE	TRUE	TRUE	TRUE	TRUE	TRUE
1811	542332	Avicennia	germinans	Avicennia germinans	-39.2842	-14.5933	South America	Brazil	UruÃ§uca	Distrito de Serra Grande. Estrada que leva Ã Prainha	TRUE	TRUE	TRUE	TRUE	TRUE	TRUE	TRUE	TRUE	TRUE	TRUE
1812	612785	Avicennia	germinans	Avicennia germinans	-39.3981	-17.7981		Brazil	Caravelas	Extremo Sul da Bahia. Rio do Cupido, complexo estuarino Caravelas - Nova ViÃ§osa.	TRUE	TRUE	TRUE	TRUE	TRUE	TRUE	TRUE	TRUE	TRUE	TRUE
1813	31651	Avicennia	germinans	Avicennia germinans	-39.3983	-17.7981		Brazil	Caravelas	Extremo sul da Bahia. Rio do Cupido, complexo estuarino Caravelas - Nova ViÃ§osa. Sobre solo arenoso em Ã¡rea de restinga pleistocÃªnica aberta. PrÃ³ximo ao rio, na beira do ecossistema manguezal.	TRUE	TRUE	TRUE	TRUE	TRUE	TRUE	TRUE	TRUE	TRUE	TRUE
1816	14992	Avicennia	germinans	Avicennia germinans	-39.5508	-18.0867		Brazil	Mucuri	Foz do Rio Mucuri, Ecossistema manguezal.	TRUE	TRUE	TRUE	TRUE	TRUE	TRUE	TRUE	TRUE	TRUE	TRUE
1817	29119	Avicennia	germinans	Avicennia germinans	-39.7332	-18.559		Brazil	ConceiÃ§Ã£o da Barra	Praia da Guaxindiba, Ilhota em estuÃ¡rio.	TRUE	TRUE	TRUE	TRUE	TRUE	TRUE	TRUE	TRUE	TRUE	TRUE
1818	2	Avicennia	germinans	Avicennia germinans	-39.7394	-18.6047	South Atlantic	Brazil	Conceicao da Barra	Sao Mateus River estuarine system	TRUE	TRUE	TRUE	TRUE	TRUE	TRUE	TRUE	TRUE	TRUE	TRUE
1819	3	Avicennia	germinans	Avicennia germinans	-39.7489	-18.5924	South Atlantic	Brazil	Conceicao da Barra	Sao Mateus River estuarine system	TRUE	TRUE	TRUE	TRUE	TRUE	TRUE	TRUE	TRUE	TRUE	TRUE
1820	1	Avicennia	germinans	Avicennia germinans	-39.7658	-18.6387	South Atlantic	Brazil	Conceicao da Barra	Sao Mateus River estuarine system	TRUE	TRUE	TRUE	TRUE	TRUE	TRUE	TRUE	TRUE	TRUE	TRUE
1821	12027	Avicennia	germinans	Avicennia germinans	-39.7819	-18.7572	AmÃ©rica do Sul	Brazil	SÃƒO MATEUS		TRUE	TRUE	TRUE	TRUE	TRUE	TRUE	TRUE	TRUE	TRUE	TRUE
1830	7	Avicennia	germinans	Avicennia germinans	-40.9718	-21.2856	South Atlantic	Brazil	Sao Francisco de Itabapoana	Itabapoana River estuarine system (ES-RJ)	TRUE	TRUE	TRUE	TRUE	TRUE	TRUE	TRUE	TRUE	TRUE	TRUE
1832	1	Avicennia	germinans	Avicennia germinans	-41.043	-21.5944	South Atlantic	Brazil	Sao Francisco de Itabapoana	Gargau River estuarine system - Lima Island	TRUE	TRUE	TRUE	TRUE	TRUE	TRUE	TRUE	TRUE	TRUE	TRUE
1833	26	Avicennia	germinans	Avicennia germinans	-41.0433	-21.5949	South Atlantic	Brazil	Sao Francisco de Itabapoana	Ilha do Lima	TRUE	TRUE	TRUE	TRUE	TRUE	TRUE	TRUE	TRUE	TRUE	TRUE
1834	27	Avicennia	germinans	Avicennia germinans	-41.0433	-21.5949	South Atlantic	Brazil	Sao Francisco de Itabapoana	Ilha do Lima	TRUE	TRUE	TRUE	TRUE	TRUE	TRUE	TRUE	TRUE	TRUE	TRUE
1835	25	Avicennia	germinans	Avicennia germinans	-41.0433	-21.5949	South Atlantic	Brazil	Sao Francisco de Itabapoana	Ilha do Lima	TRUE	TRUE	TRUE	TRUE	TRUE	TRUE	TRUE	TRUE	TRUE	TRUE
1836	30	Avicennia	germinans	Avicennia germinans	-41.0433	-21.5949	South Atlantic	Brazil	Sao Francisco de Itabapoana	Ilha do Lima	TRUE	TRUE	TRUE	TRUE	TRUE	TRUE	TRUE	TRUE	TRUE	TRUE
1837	28	Avicennia	germinans	Avicennia germinans	-41.0433	-21.5949	South Atlantic	Brazil	Sao Francisco de Itabapoana	Ilha do Lima	TRUE	TRUE	TRUE	TRUE	TRUE	TRUE	TRUE	TRUE	TRUE	TRUE
1838	29	Avicennia	germinans	Avicennia germinans	-41.0433	-21.5949	South Atlantic	Brazil	Sao Francisco de Itabapoana	Ilha do Lima	TRUE	TRUE	TRUE	TRUE	TRUE	TRUE	TRUE	TRUE	TRUE	TRUE
1839	34	Avicennia	germinans	Avicennia germinans	-41.0498	-21.606	South Atlantic	Brazil	Sao Francisco de Itabapoana	Riacho dos Macacos	TRUE	TRUE	TRUE	TRUE	TRUE	TRUE	TRUE	TRUE	TRUE	TRUE
1840	33	Avicennia	germinans	Avicennia germinans	-41.0498	-21.606	South Atlantic	Brazil	Sao Francisco de Itabapoana	Riacho dos Macacos	TRUE	TRUE	TRUE	TRUE	TRUE	TRUE	TRUE	TRUE	TRUE	TRUE
1841	32	Avicennia	germinans	Avicennia germinans	-41.0498	-21.606	South Atlantic	Brazil	Sao Francisco de Itabapoana	Riacho dos Macacos	TRUE	TRUE	TRUE	TRUE	TRUE	TRUE	TRUE	TRUE	TRUE	TRUE
1842	31	Avicennia	germinans	Avicennia germinans	-41.0498	-21.606	South Atlantic	Brazil	Sao Francisco de Itabapoana	Riacho dos Macacos	TRUE	TRUE	TRUE	TRUE	TRUE	TRUE	TRUE	TRUE	TRUE	TRUE
1843	36	Avicennia	germinans	Avicennia germinans	-41.0498	-21.606	South Atlantic	Brazil	Sao Francisco de Itabapoana	Riacho dos Macacos	TRUE	TRUE	TRUE	TRUE	TRUE	TRUE	TRUE	TRUE	TRUE	TRUE
1844	35	Avicennia	germinans	Avicennia germinans	-41.0498	-21.606	South Atlantic	Brazil	Sao Francisco de Itabapoana	Riacho dos Macacos	TRUE	TRUE	TRUE	TRUE	TRUE	TRUE	TRUE	TRUE	TRUE	TRUE
1845	2	Avicennia	germinans	Avicennia germinans	-41.0503	-21.6038	South Atlantic	Brazil	Sao Francisco de Itabapoana	Gargau River estuarine system - Macacos' stream	TRUE	TRUE	TRUE	TRUE	TRUE	TRUE	TRUE	TRUE	TRUE	TRUE
1846	35888	Avicennia	germinans	Avicennia germinans	-41.7869	-22.3708		Brazil	MacaÃ©	Foz do Rio MacaÃ©.	TRUE	TRUE	TRUE	TRUE	TRUE	TRUE	TRUE	TRUE	TRUE	TRUE
1847	154229	Avicennia	germinans	Avicennia germinans	-41.8187	-2.77294		Brazil	ParanaÃ­ba	ao longo do Delta do Rio ParnaÃ­ba	TRUE	TRUE	TRUE	TRUE	TRUE	TRUE	TRUE	TRUE	TRUE	TRUE
1848	154229	Avicennia	germinans	Avicennia germinans	-41.8187	-2.77294		Brazil	ParanaÃ­ba	Ao longo do Delta do Rio ParnaÃ­ba, 0-1 msm.	TRUE	TRUE	TRUE	TRUE	TRUE	TRUE	TRUE	TRUE	TRUE	TRUE
1849	154229	Avicennia	germinans	Avicennia germinans	-41.8187	-2.77294		Brazil	ParanaÃ­ba	Ao longo do Delta do rio ParnaÃ­ba, 0-1 msm.	TRUE	TRUE	TRUE	TRUE	TRUE	TRUE	TRUE	TRUE	TRUE	TRUE
1850	100039	Avicennia	germinans	Avicennia germinans	-41.829	-2.78647		Brazil	ParanaÃ­ba	Ao longo do Delta do Rio ParnaÃ­ba, 0-1 msm.	TRUE	TRUE	TRUE	TRUE	TRUE	TRUE	TRUE	TRUE	TRUE	TRUE
1851	100.039	Avicennia	germinans	Avicennia germinans	-41.829	-2.78647		Brazil	ParanaÃ­ba	Ao longo do Delta do rio ParnaÃ­ba, 0-1msm.	TRUE	TRUE	TRUE	TRUE	TRUE	TRUE	TRUE	TRUE	TRUE	TRUE
1852	154247	Avicennia	germinans	Avicennia germinans	-41.8464	-2.78481		Brazil	ParanaÃ­ba	Ao longo do Delta do rio ParnaÃ­ba, 0-1 msm.	TRUE	TRUE	TRUE	TRUE	TRUE	TRUE	TRUE	TRUE	TRUE	TRUE
1853	154247	Avicennia	germinans	Avicennia germinans	-41.8464	-2.78481		Brazil	ParanaÃ­ba	ao longo do Delta do Rio ParnaÃ­ba	TRUE	TRUE	TRUE	TRUE	TRUE	TRUE	TRUE	TRUE	TRUE	TRUE
1854	596284	Avicennia	germinans	Avicennia germinans	-42.3	-22.6		Brazil	MacaÃ©	Rio MacaÃ© (Foz).	TRUE	TRUE	TRUE	TRUE	TRUE	TRUE	TRUE	TRUE	TRUE	TRUE
1855	6	Avicennia	germinans	Avicennia germinans	-43.0667	-22.6833	Atlantic Ocean	Brazil	Mage	Guanabara Bay	TRUE	TRUE	TRUE	TRUE	TRUE	TRUE	TRUE	TRUE	TRUE	TRUE
1856	1183956	Avicennia	germinans	Avicennia germinans	-43.2075	-22.9028	South America	Brazil	Rio de Janeiro	Mun. de SÃ£o Francisco do Itabapoana, GargaÃº. BraÃ§o do Rio ParaÃ­ba do Sul. Aproximadamente nÃ­vel do mar, EPE 8M.	TRUE	TRUE	TRUE	TRUE	TRUE	TRUE	TRUE	TRUE	TRUE	TRUE
1857	1332	Avicennia	germinans	Avicennia germinans	-43.4558	-2.59889		Brazil	Humberto de Campos	Farol de Santana	TRUE	TRUE	TRUE	TRUE	TRUE	TRUE	TRUE	TRUE	TRUE	TRUE
1858	1065	Avicennia	germinans	Avicennia germinans	-44.2239	-2.48278		Brazil	SÃ£o Luis	Olho d'Ã¡gua	TRUE	TRUE	TRUE	TRUE	TRUE	TRUE	TRUE	TRUE	TRUE	TRUE
1859	161329	Avicennia	germinans	Avicennia germinans	-44.2728	-2.59639	Southern America	Brazil	SÃ£o LuÃ­s	Parque Estadual do Bacanga	TRUE	TRUE	TRUE	TRUE	TRUE	TRUE	TRUE	TRUE	TRUE	TRUE
1879	21	Avicennia	germinans	Avicennia germinans	-46.112	-1.2088	South Atlantic	Brazil	Viseu	Jabotitua-Jatium Protected Area	TRUE	TRUE	TRUE	TRUE	TRUE	TRUE	TRUE	TRUE	TRUE	TRUE
1881	4549	Avicennia	germinans	Avicennia germinans	-46.5122	-1.03333	AmÃ©rica do Sul	Brazil	Augusto CorrÃªa	Ilha do Rodrigues, terreno elevado com solo arenoso, circundado por manguezais, aprox. 14 km ao leste de Augusto CorrÃªa. TransiÃ§Ã£o entre campo e manguezal no leste da ilha	TRUE	TRUE	TRUE	TRUE	TRUE	TRUE	TRUE	TRUE	TRUE	TRUE
1882	4571	Avicennia	germinans	Avicennia germinans	-46.5122	-1.03333	AmÃ©rica do Sul	Brazil	Augusto CorrÃªa	Ilha do Rodrigues, terreno elevado com solo arenoso, circundado por manguezais, aprox. 14 km ao leste de Augusto CorrÃªa. TransiÃ§Ã£o entre campo e manguezal no leste da ilha	TRUE	TRUE	TRUE	TRUE	TRUE	TRUE	TRUE	TRUE	TRUE	TRUE
1895	5	Avicennia	germinans	Avicennia germinans	-46.65	-0.9167	South Atlantic	Brazil	Braganca	Peninsula de Braganca	TRUE	TRUE	TRUE	TRUE	TRUE	TRUE	TRUE	TRUE	TRUE	TRUE
1899	1	Avicennia	germinans	Avicennia germinans	-46.6749	-0.9185	South Atlantic	Brazil	Braganca	Ajuruteua Peninsula	TRUE	TRUE	TRUE	TRUE	TRUE	TRUE	TRUE	TRUE	TRUE	TRUE
1901	475	Avicennia	germinans	Avicennia germinans	-46.6931	-0.918056	AmÃ©rica do Sul	Brazil	BraganÃ§a	PenÃ­nsula de Ajuruteua, Ã¡rea lamosa hipersalina no lado da estrada BraganÃ§a-Ajuruteua (PA-458). VegetaÃ§Ã£o escassa de mangue anÃ£o e halÃ³fitas herbÃ¡ceas	TRUE	TRUE	TRUE	TRUE	TRUE	TRUE	TRUE	TRUE	TRUE	TRUE
1902	476	Avicennia	germinans	Avicennia germinans	-46.6931	-0.918056	AmÃ©rica do Sul	Brazil	BraganÃ§a	PenÃ­nsula de Ajuruteua, Ã¡rea lamosa hipersalina no lado da estrada BraganÃ§a-Ajuruteua (PA-458). VegetaÃ§Ã£o escassa de mangue anÃ£o e halÃ³fitas herbÃ¡ceas	TRUE	TRUE	TRUE	TRUE	TRUE	TRUE	TRUE	TRUE	TRUE	TRUE
1903	477	Avicennia	germinans	Avicennia germinans	-46.6931	-0.918056	AmÃ©rica do Sul	Brazil	BraganÃ§a	PenÃ­nsula de Ajuruteua, Ã¡rea lamosa hipersalina no lado da estrada BraganÃ§a-Ajuruteua (PA-458). VegetaÃ§Ã£o escassa de mangue anÃ£o e halÃ³fitas herbÃ¡ceas	TRUE	TRUE	TRUE	TRUE	TRUE	TRUE	TRUE	TRUE	TRUE	TRUE
1904	478	Avicennia	germinans	Avicennia germinans	-46.6931	-0.918056	AmÃ©rica do Sul	Brazil	BraganÃ§a	PenÃ­nsula de Ajuruteua, Ã¡rea lamosa hipersalina no lado da estrada BraganÃ§a-Ajuruteua (PA-458). VegetaÃ§Ã£o escassa de mangue anÃ£o e halÃ³fitas herbÃ¡ceas	TRUE	TRUE	TRUE	TRUE	TRUE	TRUE	TRUE	TRUE	TRUE	TRUE
1905	479	Avicennia	germinans	Avicennia germinans	-46.6931	-0.918056	AmÃ©rica do Sul	Brazil	BraganÃ§a	PenÃ­nsula de Ajuruteua, Ã¡rea lamosa hipersalina no lado da estrada BraganÃ§a-Ajuruteua (PA-458). VegetaÃ§Ã£o escassa de mangue anÃ£o e halÃ³fitas herbÃ¡ceas	TRUE	TRUE	TRUE	TRUE	TRUE	TRUE	TRUE	TRUE	TRUE	TRUE
1906	480	Avicennia	germinans	Avicennia germinans	-46.6931	-0.918056	AmÃ©rica do Sul	Brazil	BraganÃ§a	PenÃ­nsula de Ajuruteua, Ã¡rea lamosa hipersalina no lado da estrada BraganÃ§a-Ajuruteua (PA-458). VegetaÃ§Ã£o escassa de mangue anÃ£o e halÃ³fitas herbÃ¡ceas	TRUE	TRUE	TRUE	TRUE	TRUE	TRUE	TRUE	TRUE	TRUE	TRUE
1907	481	Avicennia	germinans	Avicennia germinans	-46.6931	-0.918056	AmÃ©rica do Sul	Brazil	BraganÃ§a	PenÃ­nsula de Ajuruteua, Ã¡rea lamosa hipersalina no lado da estrada BraganÃ§a-Ajuruteua (PA-458). VegetaÃ§Ã£o escassa de mangue anÃ£o e halÃ³fitas herbÃ¡ceas	TRUE	TRUE	TRUE	TRUE	TRUE	TRUE	TRUE	TRUE	TRUE	TRUE
1908	482	Avicennia	germinans	Avicennia germinans	-46.6931	-0.918056	AmÃ©rica do Sul	Brazil	BraganÃ§a	PenÃ­nsula de Ajuruteua, Ã¡rea lamosa hipersalina no lado da estrada BraganÃ§a-Ajuruteua (PA-458). VegetaÃ§Ã£o escassa de mangue anÃ£o e halÃ³fitas herbÃ¡ceas	TRUE	TRUE	TRUE	TRUE	TRUE	TRUE	TRUE	TRUE	TRUE	TRUE
1909	483	Avicennia	germinans	Avicennia germinans	-46.6931	-0.918056	AmÃ©rica do Sul	Brazil	BraganÃ§a	PenÃ­nsula de Ajuruteua, Ã¡rea lamosa hipersalina no lado da estrada BraganÃ§a-Ajuruteua (PA-458). VegetaÃ§Ã£o escassa de mangue anÃ£o e halÃ³fitas herbÃ¡ceas	TRUE	TRUE	TRUE	TRUE	TRUE	TRUE	TRUE	TRUE	TRUE	TRUE
1910	484	Avicennia	germinans	Avicennia germinans	-46.6931	-0.918056	AmÃ©rica do Sul	Brazil	BraganÃ§a	PenÃ­nsula de Ajuruteua, Ã¡rea lamosa hipersalina no lado da estrada BraganÃ§a-Ajuruteua (PA-458). VegetaÃ§Ã£o escassa de mangue anÃ£o e halÃ³fitas herbÃ¡ceas	TRUE	TRUE	TRUE	TRUE	TRUE	TRUE	TRUE	TRUE	TRUE	TRUE
1911	485	Avicennia	germinans	Avicennia germinans	-46.6931	-0.918056	AmÃ©rica do Sul	Brazil	BraganÃ§a	PenÃ­nsula de Ajuruteua, Ã¡rea lamosa hipersalina no lado da estrada BraganÃ§a-Ajuruteua (PA-458). VegetaÃ§Ã£o escassa de mangue anÃ£o e halÃ³fitas herbÃ¡ceas	TRUE	TRUE	TRUE	TRUE	TRUE	TRUE	TRUE	TRUE	TRUE	TRUE
1912	486	Avicennia	germinans	Avicennia germinans	-46.6931	-0.918056	AmÃ©rica do Sul	Brazil	BraganÃ§a	PenÃ­nsula de Ajuruteua, Ã¡rea lamosa hipersalina no lado da estrada BraganÃ§a-Ajuruteua (PA-458). VegetaÃ§Ã£o escassa de mangue anÃ£o e halÃ³fitas herbÃ¡ceas	TRUE	TRUE	TRUE	TRUE	TRUE	TRUE	TRUE	TRUE	TRUE	TRUE
1913	487	Avicennia	germinans	Avicennia germinans	-46.6931	-0.918056	AmÃ©rica do Sul	Brazil	BraganÃ§a	PenÃ­nsula de Ajuruteua, Ã¡rea lamosa hipersalina no lado da estrada BraganÃ§a-Ajuruteua (PA-458). VegetaÃ§Ã£o escassa de mangue anÃ£o e halÃ³fitas herbÃ¡ceas	TRUE	TRUE	TRUE	TRUE	TRUE	TRUE	TRUE	TRUE	TRUE	TRUE
1914	488	Avicennia	germinans	Avicennia germinans	-46.6931	-0.918056	AmÃ©rica do Sul	Brazil	BraganÃ§a	PenÃ­nsula de Ajuruteua, Ã¡rea lamosa hipersalina no lado da estrada BraganÃ§a-Ajuruteua (PA-458). VegetaÃ§Ã£o escassa de mangue anÃ£o e halÃ³fitas herbÃ¡ceas	TRUE	TRUE	TRUE	TRUE	TRUE	TRUE	TRUE	TRUE	TRUE	TRUE
1915	489	Avicennia	germinans	Avicennia germinans	-46.6931	-0.918056	AmÃ©rica do Sul	Brazil	BraganÃ§a	PenÃ­nsula de Ajuruteua, Ã¡rea lamosa hipersalina no lado da estrada BraganÃ§a-Ajuruteua (PA-458). VegetaÃ§Ã£o escassa de mangue anÃ£o e halÃ³fitas herbÃ¡ceas	TRUE	TRUE	TRUE	TRUE	TRUE	TRUE	TRUE	TRUE	TRUE	TRUE
1916	3	Avicennia	germinans	Avicennia germinans	-46.7011	-0.9311	South Atlantic	Brazil	Braganca	Caete estuarine system	TRUE	TRUE	TRUE	TRUE	TRUE	TRUE	TRUE	TRUE	TRUE	TRUE
1917	1	Avicennia	germinans	Avicennia germinans	-46.7094	-0.9103	South Atlantic	Brazil	Braganca	Planicie Bragantina	TRUE	TRUE	TRUE	TRUE	TRUE	TRUE	TRUE	TRUE	TRUE	TRUE
1918	4775	Avicennia	germinans	Avicennia germinans	-46.7124	-0.937222	AmÃ©rica do Sul	Brazil	BraganÃ§a	PenÃ­nsula de Ajuruteua, margem da estrada PA-458 BraganÃ§a-Ajuruteua, prÃ³ximo do braÃ§o cortado do canal de marÃ© Furo da Salina	TRUE	TRUE	TRUE	TRUE	TRUE	TRUE	TRUE	TRUE	TRUE	TRUE
1919	6	Avicennia	germinans	Avicennia germinans	-46.7264	-0.9782	South Atlantic	Brazil	Braganca	Ajuruteua Peninsula, Canelas Island and Ajuruteua Beach	TRUE	TRUE	TRUE	TRUE	TRUE	TRUE	TRUE	TRUE	TRUE	TRUE
1920	1	Avicennia	germinans	Avicennia germinans	-46.7539	-1.0085	South Atlantic	Brazil	Braganca	Acarajo	TRUE	TRUE	TRUE	TRUE	TRUE	TRUE	TRUE	TRUE	TRUE	TRUE
1921	1	Avicennia	germinans	Avicennia germinans	-46.7539	-1.0085	South Atlantic	Brazil	Braganca	Acarajo	TRUE	TRUE	TRUE	TRUE	TRUE	TRUE	TRUE	TRUE	TRUE	TRUE
1922	2256	Avicennia	germinans	Avicennia germinans	-46.883	-0.846694	AmÃ©rica do Sul	Brazil	Tracuateua	Porto Alemanha, manguezal na margem da estrada para Porto Alemanha	TRUE	TRUE	TRUE	TRUE	TRUE	TRUE	TRUE	TRUE	TRUE	TRUE
1923	15	Avicennia	germinans	Avicennia germinans	-46.9558	-0.8652	South Atlantic	Brazil	Braganca	Quatipuru mangrove	TRUE	TRUE	TRUE	TRUE	TRUE	TRUE	TRUE	TRUE	TRUE	TRUE
1924	14	Avicennia	germinans	Avicennia germinans	-47.0919	-0.9193	South Atlantic	Brazil	Primavera	Primavera mangrove	TRUE	TRUE	TRUE	TRUE	TRUE	TRUE	TRUE	TRUE	TRUE	TRUE
1925	4525	Avicennia	germinans	Avicennia germinans	-47.1167	-0.958772		Brazil	Primavera	Solo arenoso.	TRUE	TRUE	TRUE	TRUE	TRUE	TRUE	TRUE	TRUE	TRUE	TRUE
1926	4954	Avicennia	germinans	Avicennia germinans	-47.1167	-0.958772		Brazil	Primavera	Solo arenoso.	TRUE	TRUE	TRUE	TRUE	TRUE	TRUE	TRUE	TRUE	TRUE	TRUE
1927	49886	Avicennia	germinans	Avicennia germinans	-47.1187	-1.15333		Brazil	Tracuateua	Porto Alemanha, manguezal na margem da estrada par	TRUE	TRUE	TRUE	TRUE	TRUE	TRUE	TRUE	TRUE	TRUE	TRUE
1928	19	Avicennia	germinans	Avicennia germinans	-47.1804	-0.7654	South Atlantic	Brazil	Sao Joao de Piribas	Sao Joao de Piribas mangrove	TRUE	TRUE	TRUE	TRUE	TRUE	TRUE	TRUE	TRUE	TRUE	TRUE
1932	572	Avicennia	germinans	Avicennia germinans	-47.6558	-0.866831		Brazil	MarudÃ¡	Praia do Crispin. Restinga.	TRUE	TRUE	TRUE	TRUE	TRUE	TRUE	TRUE	TRUE	TRUE	TRUE
1941	18	Avicennia	germinans	Avicennia germinans	-48.0129	-0.7437	South Atlantic	Brazil	Sao Caetano de Odivelas	Araciteua River, Nova Island, Mojuim River	TRUE	TRUE	TRUE	TRUE	TRUE	TRUE	TRUE	TRUE	TRUE	TRUE
1942	13241	Avicennia	germinans	Avicennia germinans	-48.1417	-0.8583		Brazil	Vigia		TRUE	TRUE	TRUE	TRUE	TRUE	TRUE	TRUE	TRUE	TRUE	TRUE
1943	20	Avicennia	germinans	Avicennia germinans	-48.1484	-0.8543	South Atlantic	Brazil	Vigia	Vigia mangrove	TRUE	TRUE	TRUE	TRUE	TRUE	TRUE	TRUE	TRUE	TRUE	TRUE
1944	8	Avicennia	germinans	Avicennia germinans	-48.2867	-0.9331	South Atlantic	Brazil	Colares	Colares mangrove	TRUE	TRUE	TRUE	TRUE	TRUE	TRUE	TRUE	TRUE	TRUE	TRUE
1945	946	Avicennia	germinans	Avicennia germinans	-48.2969	-0.9345	AmÃ©rica do Sul	Brazil	Colares	cidade de Colares, praia com rochas no sul da cidade, em solo arenoso	TRUE	TRUE	TRUE	TRUE	TRUE	TRUE	TRUE	TRUE	TRUE	TRUE
1946	5	Avicennia	germinans	Avicennia germinans	-48.324	-1.1911	South Atlantic	Brazil	Benevides	Shipyard creek	TRUE	TRUE	TRUE	TRUE	TRUE	TRUE	TRUE	TRUE	TRUE	TRUE
1947	12	Avicennia	germinans	Avicennia germinans	-48.34	-1.3298	South Atlantic	Brazil	Marituba	Marituba mangrove	TRUE	TRUE	TRUE	TRUE	TRUE	TRUE	TRUE	TRUE	TRUE	TRUE
1957	2813	Avicennia	germinans	Avicennia germinans	-48.5075	-0.667394		Brazil	Soure	Comunidade do CÃ©u.	TRUE	TRUE	TRUE	TRUE	TRUE	TRUE	TRUE	TRUE	TRUE	TRUE
1958	2263	Avicennia	germinans	Avicennia germinans	-48.5075	-0.667394		Brazil	Soure	Praia de CajÃº - Una, Restinga.	TRUE	TRUE	TRUE	TRUE	TRUE	TRUE	TRUE	TRUE	TRUE	TRUE
1959	2386	Avicennia	germinans	Avicennia germinans	-48.5075	-0.6675		Brazil	Soure	Praia de Caju-Una, Restinga de TurÃ©.	TRUE	TRUE	TRUE	TRUE	TRUE	TRUE	TRUE	TRUE	TRUE	TRUE
1960	3353	Avicennia	germinans	Avicennia germinans	-48.5092	-0.666675		Brazil	Soure	Comunidade do Pesqueiro	TRUE	TRUE	TRUE	TRUE	TRUE	TRUE	TRUE	TRUE	TRUE	TRUE
1961	4046	Avicennia	germinans	Avicennia germinans	-48.5092	-0.666675		Brazil	Soure	Comunidade do Pesqueiro.	TRUE	TRUE	TRUE	TRUE	TRUE	TRUE	TRUE	TRUE	TRUE	TRUE
1967	8060	Avicennia	germinans	Avicennia germinans	-48.8742	-1.72944	AmÃ©rica do Sul	Brazil	Abaetetuba	Comunidade Nossa Senhora dos Anjos	TRUE	TRUE	TRUE	TRUE	TRUE	TRUE	TRUE	TRUE	TRUE	TRUE
1968	2528	Avicennia	germinans	Avicennia germinans	-48.8743	-1.7295		Brazil	Abaetetuba	Comunidade Nossa Senhora dos Anjos	TRUE	TRUE	TRUE	TRUE	TRUE	TRUE	TRUE	TRUE	TRUE	TRUE
1970	4523	Avicennia	germinans	Avicennia germinans	-49.6095	-0.056878		Brazil	Chaves	Ilha de MarajÃ³, Unidade de ConservaÃ§Ã£o de Chaves, Costa Norte da Ilha.	TRUE	TRUE	TRUE	TRUE	TRUE	TRUE	TRUE	TRUE	TRUE	TRUE
1972	1745	Avicennia	germinans	Avicennia germinans	-50.0084	1.69372	AmÃ©rica do Sul	Brazil	AmapÃ¡	SucurijÃº, beira do Rio Sucuriju	TRUE	TRUE	TRUE	TRUE	TRUE	TRUE	TRUE	TRUE	TRUE	TRUE
1973	1680	Avicennia	germinans	Avicennia germinans	-50.0094	1.64578	AmÃ©rica do Sul	Brazil	AmapÃ¡	SucurijÃº, margem do Rio Sucuriju, mangue	TRUE	TRUE	TRUE	TRUE	TRUE	TRUE	TRUE	TRUE	TRUE	TRUE
1974	12279	Avicennia	germinans	Avicennia germinans	-50.5	-2.08333		Brazil	AmapÃ¡		TRUE	TRUE	TRUE	TRUE	TRUE	TRUE	TRUE	TRUE	TRUE	TRUE
1975	12255	Avicennia	germinans	Avicennia germinans	-50.7833	-1.86667		Brazil	AmapÃ¡		TRUE	TRUE	TRUE	TRUE	TRUE	TRUE	TRUE	TRUE	TRUE	TRUE
1976	182693	Avicennia	germinans	Avicennia germinans	-57.7833	6.58333		Guyana		Region: Mahaica-Berbice. Abary River mouth & along canals leading into river, between coastal hwy & acean	TRUE	TRUE	TRUE	TRUE	TRUE	TRUE	TRUE	TRUE	TRUE	TRUE
1977	83734	Avicennia	germinans	Avicennia germinans	-91.75	18.35		Mexico	El Carmen	Laguna San Francisco	TRUE	TRUE	TRUE	TRUE	TRUE	TRUE	TRUE	TRUE	TRUE	TRUE
1978	C5084T41454	Avicennia	schaueriana	Avicennia schaueriana	-47.9201	-25.0693	South America	Brazil	CananÃ©ia	Ilha do Cardoso	TRUE	TRUE	TRUE	TRUE	TRUE	TRUE	TRUE	TRUE	TRUE	TRUE
1979	74	Avicennia	schaueriana	Avicennia schaueriana	-43.1081	-22.6918	South America	Brazil	Mage	Nova Orleans mangrove	TRUE	TRUE	TRUE	TRUE	TRUE	TRUE	TRUE	TRUE	TRUE	TRUE
1983	59	Avicennia	schaueriana	Avicennia schaueriana	-43.1081	-22.6918	South America	Brazil	Mage	Nova Orleans mangrove	TRUE	TRUE	TRUE	TRUE	TRUE	TRUE	TRUE	TRUE	TRUE	TRUE
1984	51	Avicennia	schaueriana	Avicennia schaueriana	-37.0144	-10.8714	South America	Brazil	Barra dos Coqueiros	Rio Pomonga	TRUE	TRUE	TRUE	TRUE	TRUE	TRUE	TRUE	TRUE	TRUE	TRUE
1987	70	Avicennia	schaueriana	Avicennia schaueriana	-43.1081	-22.6918	South America	Brazil	Mage	Nova Orleans mangrove	TRUE	TRUE	TRUE	TRUE	TRUE	TRUE	TRUE	TRUE	TRUE	TRUE
1988	8	Avicennia	schaueriana	Avicennia schaueriana	-39.5583	-18.1031	South America	Brazil	Mucuri	Mucuri River	TRUE	TRUE	TRUE	TRUE	TRUE	TRUE	TRUE	TRUE	TRUE	TRUE
1989	68	Avicennia	schaueriana	Avicennia schaueriana	-43.0169	-22.6881	South America	Brazil	Guapimirim	Guapi River	TRUE	TRUE	TRUE	TRUE	TRUE	TRUE	TRUE	TRUE	TRUE	TRUE
1991	46	Avicennia	schaueriana	Avicennia schaueriana	-43.1111	-22.6908	South America	Brazil	Mage	Surui River mangrove	TRUE	TRUE	TRUE	TRUE	TRUE	TRUE	TRUE	TRUE	TRUE	TRUE
1993	47	Avicennia	schaueriana	Avicennia schaueriana	-43.1111	-22.6908	South America	Brazil	Mage	Surui River mangrove	TRUE	TRUE	TRUE	TRUE	TRUE	TRUE	TRUE	TRUE	TRUE	TRUE
1994	13	Avicennia	schaueriana	Avicennia schaueriana	-39.5583	-18.1031	South America	Brazil	Mucuri	Mucuri River	TRUE	TRUE	TRUE	TRUE	TRUE	TRUE	TRUE	TRUE	TRUE	TRUE
1995	48	Avicennia	schaueriana	Avicennia schaueriana	-43.1111	-22.6908	South America	Brazil	Mage	Surui River mangrove	TRUE	TRUE	TRUE	TRUE	TRUE	TRUE	TRUE	TRUE	TRUE	TRUE
1996	18	Avicennia	schaueriana	Avicennia schaueriana	-39.5583	-18.1031	South America	Brazil	Mucuri	Mucuri River	TRUE	TRUE	TRUE	TRUE	TRUE	TRUE	TRUE	TRUE	TRUE	TRUE
1997	28	Avicennia	schaueriana	Avicennia schaueriana	-43.1111	-22.6908	South America	Brazil	Mage	Surui River mangrove	TRUE	TRUE	TRUE	TRUE	TRUE	TRUE	TRUE	TRUE	TRUE	TRUE
1999	76	Avicennia	schaueriana	Avicennia schaueriana	-43.1081	-22.6918	South America	Brazil	Mage	Nova Orleans mangrove	TRUE	TRUE	TRUE	TRUE	TRUE	TRUE	TRUE	TRUE	TRUE	TRUE
2001	77	Avicennia	schaueriana	Avicennia schaueriana	-43.1081	-22.6918	South America	Brazil	Mage	Nova Orleans mangrove	TRUE	TRUE	TRUE	TRUE	TRUE	TRUE	TRUE	TRUE	TRUE	TRUE
2003	78	Avicennia	schaueriana	Avicennia schaueriana	-43.1081	-22.6918	South America	Brazil	Mage	Nova Orleans mangrove	TRUE	TRUE	TRUE	TRUE	TRUE	TRUE	TRUE	TRUE	TRUE	TRUE
2005	17	Avicennia	schaueriana	Avicennia schaueriana	-43.1125	-22.6924	South America	Brazil	Mage	Surui River lawn	TRUE	TRUE	TRUE	TRUE	TRUE	TRUE	TRUE	TRUE	TRUE	TRUE
2007	19	Avicennia	schaueriana	Avicennia schaueriana	-43.1125	-22.6924	South America	Brazil	Mage	Surui River lawn	TRUE	TRUE	TRUE	TRUE	TRUE	TRUE	TRUE	TRUE	TRUE	TRUE
2009	20	Avicennia	schaueriana	Avicennia schaueriana	-43.1125	-22.6924	South America	Brazil	Mage	Surui River lawn	TRUE	TRUE	TRUE	TRUE	TRUE	TRUE	TRUE	TRUE	TRUE	TRUE
2011	21	Avicennia	schaueriana	Avicennia schaueriana	-43.1125	-22.6924	South America	Brazil	Mage	Surui River lawn	TRUE	TRUE	TRUE	TRUE	TRUE	TRUE	TRUE	TRUE	TRUE	TRUE
2013	1	Avicennia	schaueriana	Avicennia schaueriana	-43.1125	-22.6924	South America	Brazil	Mage	Surui River lawn	TRUE	TRUE	TRUE	TRUE	TRUE	TRUE	TRUE	TRUE	TRUE	TRUE
2015	12	Avicennia	schaueriana	Avicennia schaueriana	-43.3539	-22.9911	South America	Brazil	Rio de Janeiro	Tijuca Lagoon	TRUE	TRUE	TRUE	TRUE	TRUE	TRUE	TRUE	TRUE	TRUE	TRUE
2017	3	Avicennia	schaueriana	Avicennia schaueriana	-43.3581	-22.9906	South America	Brazil	Rio de Janeiro	Tijuca Lagoon	TRUE	TRUE	TRUE	TRUE	TRUE	TRUE	TRUE	TRUE	TRUE	TRUE
2019	9	Avicennia	schaueriana	Avicennia schaueriana	-43.3544	-22.9906	South America	Brazil	Rio de Janeiro	Tijuca Lagoon	TRUE	TRUE	TRUE	TRUE	TRUE	TRUE	TRUE	TRUE	TRUE	TRUE
2021	169	Avicennia	schaueriana	Avicennia schaueriana	-42.9936	-22.6992	South America	Brazil	Guapimirim	Guarai River	TRUE	TRUE	TRUE	TRUE	TRUE	TRUE	TRUE	TRUE	TRUE	TRUE
2023	6	Avicennia	schaueriana	Avicennia schaueriana	-43.3564	-22.9903	South America	Brazil	Rio de Janeiro	Tijuca Lagoon	TRUE	TRUE	TRUE	TRUE	TRUE	TRUE	TRUE	TRUE	TRUE	TRUE
2025	18	Avicennia	schaueriana	Avicennia schaueriana	-43.1125	-22.6924	South America	Brazil	Mage	Surui River lawn	TRUE	TRUE	TRUE	TRUE	TRUE	TRUE	TRUE	TRUE	TRUE	TRUE
2027	22	Avicennia	schaueriana	Avicennia schaueriana	-43.3508	-22.9944	South America	Brazil	Rio de Janeiro	Tijuca Lagoon	TRUE	TRUE	TRUE	TRUE	TRUE	TRUE	TRUE	TRUE	TRUE	TRUE
2029	160	Avicennia	schaueriana	Avicennia schaueriana	-43.0092	-22.7011	South America	Brazil	Guapimirim	Guarai River	TRUE	TRUE	TRUE	TRUE	TRUE	TRUE	TRUE	TRUE	TRUE	TRUE
2031	151	Avicennia	schaueriana	Avicennia schaueriana	-43.0175	-22.7053	South America	Brazil	Guapimirim	Guarai River	TRUE	TRUE	TRUE	TRUE	TRUE	TRUE	TRUE	TRUE	TRUE	TRUE
2033	4	Avicennia	schaueriana	Avicennia schaueriana	-43.0217	-22.7253	South America	Brazil	Itaborai	Cacerebu River-Trecho A	TRUE	TRUE	TRUE	TRUE	TRUE	TRUE	TRUE	TRUE	TRUE	TRUE
2035	19	Avicennia	schaueriana	Avicennia schaueriana	-43.3517	-22.9936	South America	Brazil	Rio de Janeiro	Tijuca Lagoon	TRUE	TRUE	TRUE	TRUE	TRUE	TRUE	TRUE	TRUE	TRUE	TRUE
2037	14	Avicennia	schaueriana	Avicennia schaueriana	-42.9906	-22.7286	South America	Brazil	Itaborai	Cacerebu River-Trecho A	TRUE	TRUE	TRUE	TRUE	TRUE	TRUE	TRUE	TRUE	TRUE	TRUE
2039	209	Avicennia	schaueriana	Avicennia schaueriana	-42.9922	-22.7453	South America	Brazil	SÃ£o Goncalo	Guaxindiba River	TRUE	TRUE	TRUE	TRUE	TRUE	TRUE	TRUE	TRUE	TRUE	TRUE
2040	26	Avicennia	schaueriana	Avicennia schaueriana	-37.2089	-11.0397	South America	Brazil	Sao Cristovao	Rio Vasa Barris	TRUE	TRUE	TRUE	TRUE	TRUE	TRUE	TRUE	TRUE	TRUE	TRUE
2041	66	Avicennia	schaueriana	Avicennia schaueriana	-43.1081	-22.6918	South America	Brazil	Mage	Nova Orleans mangrove	TRUE	TRUE	TRUE	TRUE	TRUE	TRUE	TRUE	TRUE	TRUE	TRUE
2042	3	Avicennia	schaueriana	Avicennia schaueriana	-39.5583	-18.1031	South America	Brazil	Mucuri	Mucuri River	TRUE	TRUE	TRUE	TRUE	TRUE	TRUE	TRUE	TRUE	TRUE	TRUE
2043	15	Avicennia	schaueriana	Avicennia schaueriana	-43.3531	-22.9914	South America	Brazil	Rio de Janeiro	Tijuca Lagoon	TRUE	TRUE	TRUE	TRUE	TRUE	TRUE	TRUE	TRUE	TRUE	TRUE
2045	22	Avicennia	schaueriana	Avicennia schaueriana	-43.1125	-22.6924	South America	Brazil	Mage	Surui River lawn	TRUE	TRUE	TRUE	TRUE	TRUE	TRUE	TRUE	TRUE	TRUE	TRUE
2047	94	Avicennia	schaueriana	Avicennia schaueriana	-42.9964	-22.6806	South America	Brazil	Guapimirim	Guapi River	TRUE	TRUE	TRUE	TRUE	TRUE	TRUE	TRUE	TRUE	TRUE	TRUE
2049	72	Avicennia	schaueriana	Avicennia schaueriana	-43.1081	-22.6918	South America	Brazil	Mage	Nova Orleans mangrove	TRUE	TRUE	TRUE	TRUE	TRUE	TRUE	TRUE	TRUE	TRUE	TRUE
2051	73	Avicennia	schaueriana	Avicennia schaueriana	-43.1081	-22.6918	South America	Brazil	Mage	Nova Orleans mangrove	TRUE	TRUE	TRUE	TRUE	TRUE	TRUE	TRUE	TRUE	TRUE	TRUE
2053	71	Avicennia	schaueriana	Avicennia schaueriana	-43.1081	-22.6918	South America	Brazil	Mage	Nova Orleans mangrove	TRUE	TRUE	TRUE	TRUE	TRUE	TRUE	TRUE	TRUE	TRUE	TRUE
2054	34	Avicennia	schaueriana	Avicennia schaueriana	-37.2036	-11.0931	South America	Brazil	Itaporanga d'Ajuda	Rio Vasa Barris	TRUE	TRUE	TRUE	TRUE	TRUE	TRUE	TRUE	TRUE	TRUE	TRUE
2055	25	Avicennia	schaueriana	Avicennia schaueriana	-43.1125	-22.6924	South America	Brazil	Mage	Surui River lawn	TRUE	TRUE	TRUE	TRUE	TRUE	TRUE	TRUE	TRUE	TRUE	TRUE
2057	24	Avicennia	schaueriana	Avicennia schaueriana	-43.1125	-22.6924	South America	Brazil	Mage	Surui River lawn	TRUE	TRUE	TRUE	TRUE	TRUE	TRUE	TRUE	TRUE	TRUE	TRUE
2059	1	Avicennia	schaueriana	Avicennia schaueriana	-48.5152	-27.5797	South America	Brazil	Florianopolis	Itacorubi magrove	TRUE	TRUE	TRUE	TRUE	TRUE	TRUE	TRUE	TRUE	TRUE	TRUE
2061	75	Avicennia	schaueriana	Avicennia schaueriana	-43.1081	-22.6918	South America	Brazil	Mage	Nova Orleans mangrove	TRUE	TRUE	TRUE	TRUE	TRUE	TRUE	TRUE	TRUE	TRUE	TRUE
2062	44	Avicennia	schaueriana	Avicennia schaueriana	-37.0725	-10.8167	South America	Brazil	Laranjeiras	Rio Sal	TRUE	TRUE	TRUE	TRUE	TRUE	TRUE	TRUE	TRUE	TRUE	TRUE
2063	23	Avicennia	schaueriana	Avicennia schaueriana	-43.1125	-22.6924	South America	Brazil	Mage	Surui River lawn	TRUE	TRUE	TRUE	TRUE	TRUE	TRUE	TRUE	TRUE	TRUE	TRUE
2064	2	Avicennia	schaueriana	Avicennia schaueriana	-38.5775	-12.7017	South America	Brazil	Mataripe		TRUE	TRUE	TRUE	TRUE	TRUE	TRUE	TRUE	TRUE	TRUE	TRUE
2065	34	Avicennia	schaueriana	Avicennia schaueriana	-43.1111	-22.6908	South America	Brazil	Mage	Surui River mangrove	TRUE	TRUE	TRUE	TRUE	TRUE	TRUE	TRUE	TRUE	TRUE	TRUE
2067	16	Avicennia	schaueriana	Avicennia schaueriana	-43.1125	-22.6924	South America	Brazil	Mage	Surui River lawn	TRUE	TRUE	TRUE	TRUE	TRUE	TRUE	TRUE	TRUE	TRUE	TRUE
2069	7	Avicennia	schaueriana	Avicennia schaueriana	-43.1125	-22.6924	South America	Brazil	Mage	Surui River lawn	TRUE	TRUE	TRUE	TRUE	TRUE	TRUE	TRUE	TRUE	TRUE	TRUE
2070	27	Avicennia	schaueriana	Avicennia schaueriana	-46.7264	-0.9782	South America	Brazil	Braganca	Ajuruteua Peninsula, Canelas Island and Ajuruteua Beach	TRUE	TRUE	TRUE	TRUE	TRUE	TRUE	TRUE	TRUE	TRUE	TRUE
2071	26	Avicennia	schaueriana	Avicennia schaueriana	-43.1125	-22.6924	South America	Brazil	Mage	Surui River lawn	TRUE	TRUE	TRUE	TRUE	TRUE	TRUE	TRUE	TRUE	TRUE	TRUE
2073	9	Avicennia	schaueriana	Avicennia schaueriana	-43.1125	-22.6924	South America	Brazil	Mage	Surui River lawn	TRUE	TRUE	TRUE	TRUE	TRUE	TRUE	TRUE	TRUE	TRUE	TRUE
2074	31	Avicennia	schaueriana	Avicennia schaueriana	-47.1804	-0.7654	South America	Brazil	Sao Joao de Piribas	Sao Joao de Piribas mangrove	TRUE	TRUE	TRUE	TRUE	TRUE	TRUE	TRUE	TRUE	TRUE	TRUE
2075	27	Avicennia	schaueriana	Avicennia schaueriana	-43.1125	-22.6924	South America	Brazil	Mage	Surui River lawn	TRUE	TRUE	TRUE	TRUE	TRUE	TRUE	TRUE	TRUE	TRUE	TRUE
2076	30	Avicennia	schaueriana	Avicennia schaueriana	-48.0129	-0.7437	South America	Brazil	Sao Caetano de Odivelas	Araciteua River, Nova Island, Mojuim River	TRUE	TRUE	TRUE	TRUE	TRUE	TRUE	TRUE	TRUE	TRUE	TRUE
2077	8	Avicennia	schaueriana	Avicennia schaueriana	-43.1125	-22.6924	South America	Brazil	Mage	Surui River lawn	TRUE	TRUE	TRUE	TRUE	TRUE	TRUE	TRUE	TRUE	TRUE	TRUE
2079	6	Avicennia	schaueriana	Avicennia schaueriana	-43.1125	-22.6924	South America	Brazil	Mage	Surui River lawn	TRUE	TRUE	TRUE	TRUE	TRUE	TRUE	TRUE	TRUE	TRUE	TRUE
2081	58	Avicennia	schaueriana	Avicennia schaueriana	-43.1081	-22.6918	South America	Brazil	Mage	Nova Orleans mangrove	TRUE	TRUE	TRUE	TRUE	TRUE	TRUE	TRUE	TRUE	TRUE	TRUE
2083	10	Avicennia	schaueriana	Avicennia schaueriana	-43.1125	-22.6924	South America	Brazil	Mage	Surui River lawn	TRUE	TRUE	TRUE	TRUE	TRUE	TRUE	TRUE	TRUE	TRUE	TRUE
2084	1	Avicennia	schaueriana	Avicennia schaueriana	-46.3248	-23.9235	South America	Brazil	Santos	Ilha Barnabe	TRUE	TRUE	TRUE	TRUE	TRUE	TRUE	TRUE	TRUE	TRUE	TRUE
2085	50	Avicennia	schaueriana	Avicennia schaueriana	-43.1111	-22.6908	South America	Brazil	Mage	Surui River mangrove	TRUE	TRUE	TRUE	TRUE	TRUE	TRUE	TRUE	TRUE	TRUE	TRUE
2086	7	Avicennia	schaueriana	Avicennia schaueriana	-46.3248	-23.9235	South America	Brazil	Santos	Ilha Barnabe	TRUE	TRUE	TRUE	TRUE	TRUE	TRUE	TRUE	TRUE	TRUE	TRUE
2087	55	Avicennia	schaueriana	Avicennia schaueriana	-43.1081	-22.6918	South America	Brazil	Mage	Nova Orleans mangrove	TRUE	TRUE	TRUE	TRUE	TRUE	TRUE	TRUE	TRUE	TRUE	TRUE
2088	17	Avicennia	schaueriana	Avicennia schaueriana	-46.3248	-23.9235	South America	Brazil	Santos	Ilha Barnabe	TRUE	TRUE	TRUE	TRUE	TRUE	TRUE	TRUE	TRUE	TRUE	TRUE
2089	15	Avicennia	schaueriana	Avicennia schaueriana	-43.1125	-22.6924	South America	Brazil	Mage	Surui River lawn	TRUE	TRUE	TRUE	TRUE	TRUE	TRUE	TRUE	TRUE	TRUE	TRUE
2090	4	Avicennia	schaueriana	Avicennia schaueriana	-46.3058	-23.9111	South America	Brazil	Santos	Diana	TRUE	TRUE	TRUE	TRUE	TRUE	TRUE	TRUE	TRUE	TRUE	TRUE
2091	14	Avicennia	schaueriana	Avicennia schaueriana	-43.1125	-22.6924	South America	Brazil	Mage	Surui River lawn	TRUE	TRUE	TRUE	TRUE	TRUE	TRUE	TRUE	TRUE	TRUE	TRUE
2092	4	Avicennia	schaueriana	Avicennia schaueriana	-47.9681	-25.067	South America	Brazil	Cananeia	Ponta da Prainha	TRUE	TRUE	TRUE	TRUE	TRUE	TRUE	TRUE	TRUE	TRUE	TRUE
2095	13	Avicennia	schaueriana	Avicennia schaueriana	-43.1125	-22.6924	South America	Brazil	Mage	Surui River lawn	TRUE	TRUE	TRUE	TRUE	TRUE	TRUE	TRUE	TRUE	TRUE	TRUE
2096	11	Avicennia	schaueriana	Avicennia schaueriana	-46.3248	-23.9235	South America	Brazil	Santos	Ilha Barnabe	TRUE	TRUE	TRUE	TRUE	TRUE	TRUE	TRUE	TRUE	TRUE	TRUE
2097	69	Avicennia	schaueriana	Avicennia schaueriana	-43.1081	-22.6918	South America	Brazil	Mage	Nova Orleans mangrove	TRUE	TRUE	TRUE	TRUE	TRUE	TRUE	TRUE	TRUE	TRUE	TRUE
2101	33	Avicennia	schaueriana	Avicennia schaueriana	-43.1111	-22.6908	South America	Brazil	Mage	Surui River mangrove	TRUE	TRUE	TRUE	TRUE	TRUE	TRUE	TRUE	TRUE	TRUE	TRUE
2102	33	Avicennia	schaueriana	Avicennia schaueriana	-46.325	-23.9237	South America	Brazil	Santos	Ilha Barnabe	TRUE	TRUE	TRUE	TRUE	TRUE	TRUE	TRUE	TRUE	TRUE	TRUE
2104	17	Avicennia	schaueriana	Avicennia schaueriana	-47.9971	-25.0295	South America	Brazil	Cananeia	Cananeia-Iguape mangrove	TRUE	TRUE	TRUE	TRUE	TRUE	TRUE	TRUE	TRUE	TRUE	TRUE
2105	95	Avicennia	schaueriana	Avicennia schaueriana	-43.6106	-23.0165	South America	Brazil	Guaratiba	Sepetiba bay	TRUE	TRUE	TRUE	TRUE	TRUE	TRUE	TRUE	TRUE	TRUE	TRUE
2106	13	Avicennia	schaueriana	Avicennia schaueriana	-46.3248	-23.9235	South America	Brazil	Santos	Ilha Barnabe	TRUE	TRUE	TRUE	TRUE	TRUE	TRUE	TRUE	TRUE	TRUE	TRUE
2107	96	Avicennia	schaueriana	Avicennia schaueriana	-43.6106	-23.0165	South America	Brazil	Guaratiba	Sepetiba bay	TRUE	TRUE	TRUE	TRUE	TRUE	TRUE	TRUE	TRUE	TRUE	TRUE
2108	6	Avicennia	schaueriana	Avicennia schaueriana	-47.952	-25.0823	South America	Brazil	Cananeia	Ilha do Cardoso	TRUE	TRUE	TRUE	TRUE	TRUE	TRUE	TRUE	TRUE	TRUE	TRUE
2109	97	Avicennia	schaueriana	Avicennia schaueriana	-43.6106	-23.0165	South America	Brazil	Guaratiba	Sepetiba bay	TRUE	TRUE	TRUE	TRUE	TRUE	TRUE	TRUE	TRUE	TRUE	TRUE
2110	31	Avicennia	schaueriana	Avicennia schaueriana	-46.325	-23.9237	South America	Brazil	Santos	Ilha Barnabe	TRUE	TRUE	TRUE	TRUE	TRUE	TRUE	TRUE	TRUE	TRUE	TRUE
2111	98	Avicennia	schaueriana	Avicennia schaueriana	-43.6106	-23.0165	South America	Brazil	Guaratiba	Sepetiba bay	TRUE	TRUE	TRUE	TRUE	TRUE	TRUE	TRUE	TRUE	TRUE	TRUE
2112	32	Avicennia	schaueriana	Avicennia schaueriana	-46.325	-23.9237	South America	Brazil	Santos	Ilha Barnabe	TRUE	TRUE	TRUE	TRUE	TRUE	TRUE	TRUE	TRUE	TRUE	TRUE
2113	99	Avicennia	schaueriana	Avicennia schaueriana	-43.6106	-23.0165	South America	Brazil	Guaratiba	Sepetiba bay	TRUE	TRUE	TRUE	TRUE	TRUE	TRUE	TRUE	TRUE	TRUE	TRUE
2114	37	Avicennia	schaueriana	Avicennia schaueriana	-48.0111	-25.0452	South America	Brazil	Cananeia	Mar do Taquari	TRUE	TRUE	TRUE	TRUE	TRUE	TRUE	TRUE	TRUE	TRUE	TRUE
2115	100	Avicennia	schaueriana	Avicennia schaueriana	-43.6106	-23.0165	South America	Brazil	Guaratiba	Sepetiba bay	TRUE	TRUE	TRUE	TRUE	TRUE	TRUE	TRUE	TRUE	TRUE	TRUE
2117	101	Avicennia	schaueriana	Avicennia schaueriana	-43.6106	-23.0165	South America	Brazil	Guaratiba	Sepetiba bay	TRUE	TRUE	TRUE	TRUE	TRUE	TRUE	TRUE	TRUE	TRUE	TRUE
2118	18	Avicennia	schaueriana	Avicennia schaueriana	-47.9863	-25.0209	South America	Brazil	Cananeia	Cananeia-Iguape mangrove	TRUE	TRUE	TRUE	TRUE	TRUE	TRUE	TRUE	TRUE	TRUE	TRUE
2119	102	Avicennia	schaueriana	Avicennia schaueriana	-43.6106	-23.0165	South America	Brazil	Guaratiba	Sepetiba bay	TRUE	TRUE	TRUE	TRUE	TRUE	TRUE	TRUE	TRUE	TRUE	TRUE
2120	32	Avicennia	schaueriana	Avicennia schaueriana	-47.9008	-24.9772	South America	Brazil	Cananeia	Cananeia-Iguape mangrove	TRUE	TRUE	TRUE	TRUE	TRUE	TRUE	TRUE	TRUE	TRUE	TRUE
2121	103	Avicennia	schaueriana	Avicennia schaueriana	-43.6106	-23.0165	South America	Brazil	Guaratiba	Sepetiba bay	TRUE	TRUE	TRUE	TRUE	TRUE	TRUE	TRUE	TRUE	TRUE	TRUE
2122	6	Avicennia	schaueriana	Avicennia schaueriana	-46.3248	-23.9235	South America	Brazil	Santos	Ilha Barnabe	TRUE	TRUE	TRUE	TRUE	TRUE	TRUE	TRUE	TRUE	TRUE	TRUE
2123	104	Avicennia	schaueriana	Avicennia schaueriana	-43.6106	-23.0165	South America	Brazil	Guaratiba	Sepetiba bay	TRUE	TRUE	TRUE	TRUE	TRUE	TRUE	TRUE	TRUE	TRUE	TRUE
2124	5	Avicennia	schaueriana	Avicennia schaueriana	-46.3248	-23.9235	South America	Brazil	Santos	Ilha Barnabe	TRUE	TRUE	TRUE	TRUE	TRUE	TRUE	TRUE	TRUE	TRUE	TRUE
2125	105	Avicennia	schaueriana	Avicennia schaueriana	-43.6106	-23.0165	South America	Brazil	Guaratiba	Sepetiba bay	TRUE	TRUE	TRUE	TRUE	TRUE	TRUE	TRUE	TRUE	TRUE	TRUE
2126	34	Avicennia	schaueriana	Avicennia schaueriana	-46.325	-23.9237	South America	Brazil	Santos	Ilha Barnabe	TRUE	TRUE	TRUE	TRUE	TRUE	TRUE	TRUE	TRUE	TRUE	TRUE
2127	84	Avicennia	schaueriana	Avicennia schaueriana	-43.6106	-23.0165	South America	Brazil	Guaratiba	Sepetiba bay	TRUE	TRUE	TRUE	TRUE	TRUE	TRUE	TRUE	TRUE	TRUE	TRUE
2128	35	Avicennia	schaueriana	Avicennia schaueriana	-46.325	-23.9237	South America	Brazil	Santos	Ilha Barnabe	TRUE	TRUE	TRUE	TRUE	TRUE	TRUE	TRUE	TRUE	TRUE	TRUE
2129	85	Avicennia	schaueriana	Avicennia schaueriana	-43.6106	-23.0165	South America	Brazil	Guaratiba	Sepetiba bay	TRUE	TRUE	TRUE	TRUE	TRUE	TRUE	TRUE	TRUE	TRUE	TRUE
2130	36	Avicennia	schaueriana	Avicennia schaueriana	-46.325	-23.9237	South America	Brazil	Santos	Ilha Barnabe	TRUE	TRUE	TRUE	TRUE	TRUE	TRUE	TRUE	TRUE	TRUE	TRUE
2131	86	Avicennia	schaueriana	Avicennia schaueriana	-43.6106	-23.0165	South America	Brazil	Guaratiba	Sepetiba bay	TRUE	TRUE	TRUE	TRUE	TRUE	TRUE	TRUE	TRUE	TRUE	TRUE
2132	4	Avicennia	schaueriana	Avicennia schaueriana	-46.3248	-23.9235	South America	Brazil	Santos	Ilha Barnabe	TRUE	TRUE	TRUE	TRUE	TRUE	TRUE	TRUE	TRUE	TRUE	TRUE
2133	87	Avicennia	schaueriana	Avicennia schaueriana	-43.6106	-23.0165	South America	Brazil	Guaratiba	Sepetiba bay	TRUE	TRUE	TRUE	TRUE	TRUE	TRUE	TRUE	TRUE	TRUE	TRUE
2134	1	Avicennia	schaueriana	Avicennia schaueriana	-46.7833	-24.1833	South America	Brazil	ItanhaÃ©m	lower Braco Mandipauba	TRUE	TRUE	TRUE	TRUE	TRUE	TRUE	TRUE	TRUE	TRUE	TRUE
2135	88	Avicennia	schaueriana	Avicennia schaueriana	-43.6106	-23.0165	South America	Brazil	Guaratiba	Sepetiba bay	TRUE	TRUE	TRUE	TRUE	TRUE	TRUE	TRUE	TRUE	TRUE	TRUE
2136	30	Avicennia	schaueriana	Avicennia schaueriana	-46.325	-23.9237	South America	Brazil	Santos	Ilha Barnabe	TRUE	TRUE	TRUE	TRUE	TRUE	TRUE	TRUE	TRUE	TRUE	TRUE
2137	89	Avicennia	schaueriana	Avicennia schaueriana	-43.6106	-23.0165	South America	Brazil	Guaratiba	Sepetiba bay	TRUE	TRUE	TRUE	TRUE	TRUE	TRUE	TRUE	TRUE	TRUE	TRUE
2138	20	Avicennia	schaueriana	Avicennia schaueriana	-46.325	-23.9237	South America	Brazil	Santos	Ilha Barnabe	TRUE	TRUE	TRUE	TRUE	TRUE	TRUE	TRUE	TRUE	TRUE	TRUE
2139	90	Avicennia	schaueriana	Avicennia schaueriana	-43.6106	-23.0165	South America	Brazil	Guaratiba	Sepetiba bay	TRUE	TRUE	TRUE	TRUE	TRUE	TRUE	TRUE	TRUE	TRUE	TRUE
2140	16	Avicennia	schaueriana	Avicennia schaueriana	-46.3248	-23.9235	South America	Brazil	Santos	Ilha Barnabe	TRUE	TRUE	TRUE	TRUE	TRUE	TRUE	TRUE	TRUE	TRUE	TRUE
2141	91	Avicennia	schaueriana	Avicennia schaueriana	-43.6106	-23.0165	South America	Brazil	Guaratiba	Sepetiba bay	TRUE	TRUE	TRUE	TRUE	TRUE	TRUE	TRUE	TRUE	TRUE	TRUE
2142	21	Avicennia	schaueriana	Avicennia schaueriana	-46.325	-23.9237	South America	Brazil	Santos	Ilha Barnabe	TRUE	TRUE	TRUE	TRUE	TRUE	TRUE	TRUE	TRUE	TRUE	TRUE
2143	92	Avicennia	schaueriana	Avicennia schaueriana	-43.6106	-23.0165	South America	Brazil	Guaratiba	Sepetiba bay	TRUE	TRUE	TRUE	TRUE	TRUE	TRUE	TRUE	TRUE	TRUE	TRUE
2144	22	Avicennia	schaueriana	Avicennia schaueriana	-46.325	-23.9237	South America	Brazil	Santos	Ilha Barnabe	TRUE	TRUE	TRUE	TRUE	TRUE	TRUE	TRUE	TRUE	TRUE	TRUE
2145	93	Avicennia	schaueriana	Avicennia schaueriana	-43.6106	-23.0165	South America	Brazil	Guaratiba	Sepetiba bay	TRUE	TRUE	TRUE	TRUE	TRUE	TRUE	TRUE	TRUE	TRUE	TRUE
2146	24	Avicennia	schaueriana	Avicennia schaueriana	-46.325	-23.9237	South America	Brazil	Santos	Ilha Barnabe	TRUE	TRUE	TRUE	TRUE	TRUE	TRUE	TRUE	TRUE	TRUE	TRUE
2147	94	Avicennia	schaueriana	Avicennia schaueriana	-43.6106	-23.0165	South America	Brazil	Guaratiba	Sepetiba bay	TRUE	TRUE	TRUE	TRUE	TRUE	TRUE	TRUE	TRUE	TRUE	TRUE
2148	23	Avicennia	schaueriana	Avicennia schaueriana	-46.325	-23.9237	South America	Brazil	Santos	Ilha Barnabe	TRUE	TRUE	TRUE	TRUE	TRUE	TRUE	TRUE	TRUE	TRUE	TRUE
2150	26	Avicennia	schaueriana	Avicennia schaueriana	-46.325	-23.9237	South America	Brazil	Santos	Ilha Barnabe	TRUE	TRUE	TRUE	TRUE	TRUE	TRUE	TRUE	TRUE	TRUE	TRUE
2152	25	Avicennia	schaueriana	Avicennia schaueriana	-46.325	-23.9237	South America	Brazil	Santos	Ilha Barnabe	TRUE	TRUE	TRUE	TRUE	TRUE	TRUE	TRUE	TRUE	TRUE	TRUE
2153	49	Avicennia	schaueriana	Avicennia schaueriana	-43.1111	-22.6908	South America	Brazil	Mage	Surui River mangrove	TRUE	TRUE	TRUE	TRUE	TRUE	TRUE	TRUE	TRUE	TRUE	TRUE
2154	27	Avicennia	schaueriana	Avicennia schaueriana	-46.325	-23.9237	South America	Brazil	Santos	Ilha Barnabe	TRUE	TRUE	TRUE	TRUE	TRUE	TRUE	TRUE	TRUE	TRUE	TRUE
2156	2	Avicennia	schaueriana	Avicennia schaueriana	-46.4267	-23.9167	South America	Brazil	Cubatao	Imigrantes	TRUE	TRUE	TRUE	TRUE	TRUE	TRUE	TRUE	TRUE	TRUE	TRUE
2157	12	Avicennia	schaueriana	Avicennia schaueriana	-43.1125	-22.6924	South America	Brazil	Mage	Surui River lawn	TRUE	TRUE	TRUE	TRUE	TRUE	TRUE	TRUE	TRUE	TRUE	TRUE
2158	29	Avicennia	schaueriana	Avicennia schaueriana	-46.325	-23.9237	South America	Brazil	Santos	Ilha Barnabe	TRUE	TRUE	TRUE	TRUE	TRUE	TRUE	TRUE	TRUE	TRUE	TRUE
2159	10	Avicennia	schaueriana	Avicennia schaueriana	-43.6333	-23.0167	South America	Brazil	Guaratiba	Sepetiba Bay at Guaratiba Biological and Archaeological Reserve (RBAG)	TRUE	TRUE	TRUE	TRUE	TRUE	TRUE	TRUE	TRUE	TRUE	TRUE
2160	28	Avicennia	schaueriana	Avicennia schaueriana	-46.325	-23.9237	South America	Brazil	Santos	Ilha Barnabe	TRUE	TRUE	TRUE	TRUE	TRUE	TRUE	TRUE	TRUE	TRUE	TRUE
2162	15	Avicennia	schaueriana	Avicennia schaueriana	-46.3248	-23.9235	South America	Brazil	Santos	Ilha Barnabe	TRUE	TRUE	TRUE	TRUE	TRUE	TRUE	TRUE	TRUE	TRUE	TRUE
2163	11	Avicennia	schaueriana	Avicennia schaueriana	-43.1125	-22.6924	South America	Brazil	Mage	Surui River lawn	TRUE	TRUE	TRUE	TRUE	TRUE	TRUE	TRUE	TRUE	TRUE	TRUE
2164	19	Avicennia	schaueriana	Avicennia schaueriana	-46.325	-23.9237	South America	Brazil	Santos	Ilha Barnabe	TRUE	TRUE	TRUE	TRUE	TRUE	TRUE	TRUE	TRUE	TRUE	TRUE
2165	11	Avicennia	schaueriana	Avicennia schaueriana	-43.6333	-23.0167	South America	Brazil	Guaratiba	Sepetiba Bay at Guaratiba Biological and Archaeological Reserve (RBAG)	TRUE	TRUE	TRUE	TRUE	TRUE	TRUE	TRUE	TRUE	TRUE	TRUE
2166	5	Avicennia	schaueriana	Avicennia schaueriana	-48.0057	-25.0308	South America	Brazil	Cananeia	Guarapari	TRUE	TRUE	TRUE	TRUE	TRUE	TRUE	TRUE	TRUE	TRUE	TRUE
2167	57	Avicennia	schaueriana	Avicennia schaueriana	-43.1081	-22.6918	South America	Brazil	Mage	Nova Orleans mangrove	TRUE	TRUE	TRUE	TRUE	TRUE	TRUE	TRUE	TRUE	TRUE	TRUE
2168	10	Avicennia	schaueriana	Avicennia schaueriana	-46.3248	-23.9235	South America	Brazil	Santos	Ilha Barnabe	TRUE	TRUE	TRUE	TRUE	TRUE	TRUE	TRUE	TRUE	TRUE	TRUE
2169	83	Avicennia	schaueriana	Avicennia schaueriana	-43.6106	-23.0165	South America	Brazil	Guaratiba	Sepetiba bay	TRUE	TRUE	TRUE	TRUE	TRUE	TRUE	TRUE	TRUE	TRUE	TRUE
2170	43	Avicennia	schaueriana	Avicennia schaueriana	-47.9427	-25.0808	South America	Brazil	Cananeia	Cananeia-Iguape mangrove	TRUE	TRUE	TRUE	TRUE	TRUE	TRUE	TRUE	TRUE	TRUE	TRUE
2171	56	Avicennia	schaueriana	Avicennia schaueriana	-43.1081	-22.6918	South America	Brazil	Mage	Nova Orleans mangrove	TRUE	TRUE	TRUE	TRUE	TRUE	TRUE	TRUE	TRUE	TRUE	TRUE
2172	39	Avicennia	schaueriana	Avicennia schaueriana	-47.9427	-25.0808	South America	Brazil	Cananeia	Cananeia-Iguape mangrove	TRUE	TRUE	TRUE	TRUE	TRUE	TRUE	TRUE	TRUE	TRUE	TRUE
2173	6	Avicennia	schaueriana	Avicennia schaueriana	-48.7522	-26.3058	South America	Brazil	Joinville	Babitonga Bay	TRUE	TRUE	TRUE	TRUE	TRUE	TRUE	TRUE	TRUE	TRUE	TRUE
2174	3	Avicennia	schaueriana	Avicennia schaueriana	-46.3248	-23.9235	South America	Brazil	Santos	Ilha Barnabe	TRUE	TRUE	TRUE	TRUE	TRUE	TRUE	TRUE	TRUE	TRUE	TRUE
2175	39	Avicennia	schaueriana	Avicennia schaueriana	-43.1111	-22.6908	South America	Brazil	Mage	Surui River mangrove	TRUE	TRUE	TRUE	TRUE	TRUE	TRUE	TRUE	TRUE	TRUE	TRUE
2176	1	Avicennia	schaueriana	Avicennia schaueriana	-46.3252	-23.9236	South America	Brazil	Santos	Ilha Barnabe	TRUE	TRUE	TRUE	TRUE	TRUE	TRUE	TRUE	TRUE	TRUE	TRUE
2177	68	Avicennia	schaueriana	Avicennia schaueriana	-43.1081	-22.6918	South America	Brazil	Mage	Nova Orleans mangrove	TRUE	TRUE	TRUE	TRUE	TRUE	TRUE	TRUE	TRUE	TRUE	TRUE
2180	1	Avicennia	schaueriana	Avicennia schaueriana	-46.4642	-23.9361	South America	Brazil	Sao Vicente	Pedro Taques	TRUE	TRUE	TRUE	TRUE	TRUE	TRUE	TRUE	TRUE	TRUE	TRUE
2181	54	Avicennia	schaueriana	Avicennia schaueriana	-43.1111	-22.6908	South America	Brazil	Mage	Surui River mangrove	TRUE	TRUE	TRUE	TRUE	TRUE	TRUE	TRUE	TRUE	TRUE	TRUE
2182	40	Avicennia	schaueriana	Avicennia schaueriana	-47.9427	-25.0808	South America	Brazil	Cananeia	Cananeia-Iguape mangrove	TRUE	TRUE	TRUE	TRUE	TRUE	TRUE	TRUE	TRUE	TRUE	TRUE
2183	53	Avicennia	schaueriana	Avicennia schaueriana	-43.1111	-22.6908	South America	Brazil	Mage	Surui River mangrove	TRUE	TRUE	TRUE	TRUE	TRUE	TRUE	TRUE	TRUE	TRUE	TRUE
2185	41	Avicennia	schaueriana	Avicennia schaueriana	-43.1111	-22.6908	South America	Brazil	Mage	Surui River mangrove	TRUE	TRUE	TRUE	TRUE	TRUE	TRUE	TRUE	TRUE	TRUE	TRUE
2186	42	Avicennia	schaueriana	Avicennia schaueriana	-47.9427	-25.0808	South America	Brazil	Cananeia	Cananeia-Iguape mangrove	TRUE	TRUE	TRUE	TRUE	TRUE	TRUE	TRUE	TRUE	TRUE	TRUE
2187	52	Avicennia	schaueriana	Avicennia schaueriana	-43.1111	-22.6908	South America	Brazil	Mage	Surui River mangrove	TRUE	TRUE	TRUE	TRUE	TRUE	TRUE	TRUE	TRUE	TRUE	TRUE
2188	41	Avicennia	schaueriana	Avicennia schaueriana	-47.9427	-25.0808	South America	Brazil	Cananeia	Cananeia-Iguape mangrove	TRUE	TRUE	TRUE	TRUE	TRUE	TRUE	TRUE	TRUE	TRUE	TRUE
2189	51	Avicennia	schaueriana	Avicennia schaueriana	-43.1111	-22.6908	South America	Brazil	Mage	Surui River mangrove	TRUE	TRUE	TRUE	TRUE	TRUE	TRUE	TRUE	TRUE	TRUE	TRUE
2190	18	Avicennia	schaueriana	Avicennia schaueriana	-46.3248	-23.9235	South America	Brazil	Santos	Ilha Barnabe	TRUE	TRUE	TRUE	TRUE	TRUE	TRUE	TRUE	TRUE	TRUE	TRUE
2192	14	Avicennia	schaueriana	Avicennia schaueriana	-47.9008	-24.9772	South America	Brazil	Cananeia	Cananeia-Iguape mangrove	TRUE	TRUE	TRUE	TRUE	TRUE	TRUE	TRUE	TRUE	TRUE	TRUE
2193	38	Avicennia	schaueriana	Avicennia schaueriana	-43.1111	-22.6908	South America	Brazil	Mage	Surui River mangrove	TRUE	TRUE	TRUE	TRUE	TRUE	TRUE	TRUE	TRUE	TRUE	TRUE
2194	31	Avicennia	schaueriana	Avicennia schaueriana	-47.9008	-24.9772	South America	Brazil	Cananeia	Cananeia-Iguape mangrove	TRUE	TRUE	TRUE	TRUE	TRUE	TRUE	TRUE	TRUE	TRUE	TRUE
2196	3	Avicennia	schaueriana	Avicennia schaueriana	-46.35	-23.9183	South America	Brazil	Santos	Alemoa	TRUE	TRUE	TRUE	TRUE	TRUE	TRUE	TRUE	TRUE	TRUE	TRUE
2197	37	Avicennia	schaueriana	Avicennia schaueriana	-43.1111	-22.6908	South America	Brazil	Mage	Surui River mangrove	TRUE	TRUE	TRUE	TRUE	TRUE	TRUE	TRUE	TRUE	TRUE	TRUE
2198	9	Avicennia	schaueriana	Avicennia schaueriana	-46.3248	-23.9235	South America	Brazil	Santos	Ilha Barnabe	TRUE	TRUE	TRUE	TRUE	TRUE	TRUE	TRUE	TRUE	TRUE	TRUE
2200	1	Avicennia	schaueriana	Avicennia schaueriana	-47.9626	-25.0859	South America	Brazil	Cananeia	Cardoso Island (PEIC)	TRUE	TRUE	TRUE	TRUE	TRUE	TRUE	TRUE	TRUE	TRUE	TRUE
2201	36	Avicennia	schaueriana	Avicennia schaueriana	-43.1111	-22.6908	South America	Brazil	Mage	Surui River mangrove	TRUE	TRUE	TRUE	TRUE	TRUE	TRUE	TRUE	TRUE	TRUE	TRUE
2202	2	Avicennia	schaueriana	Avicennia schaueriana	-46.3248	-23.9235	South America	Brazil	Santos	Ilha Barnabe	TRUE	TRUE	TRUE	TRUE	TRUE	TRUE	TRUE	TRUE	TRUE	TRUE
2203	14	Avicennia	schaueriana	Avicennia schaueriana	-46.3248	-23.9235	South America	Brazil	Santos	Ilha Barnabe	TRUE	TRUE	TRUE	TRUE	TRUE	TRUE	TRUE	TRUE	TRUE	TRUE
2204	40	Avicennia	schaueriana	Avicennia schaueriana	-43.1111	-22.6908	South America	Brazil	Mage	Surui River mangrove	TRUE	TRUE	TRUE	TRUE	TRUE	TRUE	TRUE	TRUE	TRUE	TRUE
2205	2	Avicennia	schaueriana	Avicennia schaueriana	-46.32	-23.9215	South America	Brazil	Santos	Ilha Barnabe	TRUE	TRUE	TRUE	TRUE	TRUE	TRUE	TRUE	TRUE	TRUE	TRUE
2206	35	Avicennia	schaueriana	Avicennia schaueriana	-43.1111	-22.6908	South America	Brazil	Mage	Surui River mangrove	TRUE	TRUE	TRUE	TRUE	TRUE	TRUE	TRUE	TRUE	TRUE	TRUE
2207	8	Avicennia	schaueriana	Avicennia schaueriana	-46.3248	-23.9235	South America	Brazil	Santos	Ilha Barnabe	TRUE	TRUE	TRUE	TRUE	TRUE	TRUE	TRUE	TRUE	TRUE	TRUE
2208	2	Avicennia	schaueriana	Avicennia schaueriana	-43.1125	-22.6924	South America	Brazil	Mage	Surui River lawn	TRUE	TRUE	TRUE	TRUE	TRUE	TRUE	TRUE	TRUE	TRUE	TRUE
2209	16	Avicennia	schaueriana	Avicennia schaueriana	-47.9427	-25.0808	South America	Brazil	Cananeia	Cananeia-Iguape mangrove	TRUE	TRUE	TRUE	TRUE	TRUE	TRUE	TRUE	TRUE	TRUE	TRUE
2210	43	Avicennia	schaueriana	Avicennia schaueriana	-43.1111	-22.6908	South America	Brazil	Mage	Surui River mangrove	TRUE	TRUE	TRUE	TRUE	TRUE	TRUE	TRUE	TRUE	TRUE	TRUE
2211	35	Avicennia	schaueriana	Avicennia schaueriana	-47.9008	-24.9772	South America	Brazil	Cananeia	Cananeia-Iguape mangrove	TRUE	TRUE	TRUE	TRUE	TRUE	TRUE	TRUE	TRUE	TRUE	TRUE
2213	34	Avicennia	schaueriana	Avicennia schaueriana	-47.9008	-24.9772	South America	Brazil	Cananeia	Cananeia-Iguape mangrove	TRUE	TRUE	TRUE	TRUE	TRUE	TRUE	TRUE	TRUE	TRUE	TRUE
2214	67	Avicennia	schaueriana	Avicennia schaueriana	-43.1081	-22.6918	South America	Brazil	Mage	Nova Orleans mangrove	TRUE	TRUE	TRUE	TRUE	TRUE	TRUE	TRUE	TRUE	TRUE	TRUE
2215	33	Avicennia	schaueriana	Avicennia schaueriana	-47.9008	-24.9772	South America	Brazil	Cananeia	Cananeia-Iguape mangrove	TRUE	TRUE	TRUE	TRUE	TRUE	TRUE	TRUE	TRUE	TRUE	TRUE
2216	8	Avicennia	schaueriana	Avicennia schaueriana	-43.6333	-23.0167	South America	Brazil	Guaratiba	Sepetiba Bay at Guaratiba Biological and Archaeological Reserve (RBAG)	TRUE	TRUE	TRUE	TRUE	TRUE	TRUE	TRUE	TRUE	TRUE	TRUE
2217	12	Avicennia	schaueriana	Avicennia schaueriana	-46.3248	-23.9235	South America	Brazil	Santos	Ilha Barnabe	TRUE	TRUE	TRUE	TRUE	TRUE	TRUE	TRUE	TRUE	TRUE	TRUE
2218	3	Avicennia	schaueriana	Avicennia schaueriana	-48.7517	-26.2025	South America	Brazil	Sao Francisco do Sul	Babitonga Bay	TRUE	TRUE	TRUE	TRUE	TRUE	TRUE	TRUE	TRUE	TRUE	TRUE
2219	16	Avicennia	schaueriana	Avicennia schaueriana	-34.8756	-7.8022	South America	Brazil	Itamaraca Island	Paripe River	TRUE	TRUE	TRUE	TRUE	TRUE	TRUE	TRUE	TRUE	TRUE	TRUE
2221	1	Avicennia	schaueriana	Avicennia schaueriana	-35.1041	-8.7338	South America	Brazil	Tamandare	Ariquinda River	TRUE	TRUE	TRUE	TRUE	TRUE	TRUE	TRUE	TRUE	TRUE	TRUE
2224	64	Avicennia	schaueriana	Avicennia schaueriana	-43.1081	-22.6918	South America	Brazil	Mage	Nova Orleans mangrove	TRUE	TRUE	TRUE	TRUE	TRUE	TRUE	TRUE	TRUE	TRUE	TRUE
2228	3	Avicennia	schaueriana	Avicennia schaueriana	-48.6161	-25.5067	South America	Brazil	Paranagua	Paranagua Bay Estuarine Complex	TRUE	TRUE	TRUE	TRUE	TRUE	TRUE	TRUE	TRUE	TRUE	TRUE
2230	42	Avicennia	schaueriana	Avicennia schaueriana	-43.1111	-22.6908	South America	Brazil	Mage	Surui River mangrove	TRUE	TRUE	TRUE	TRUE	TRUE	TRUE	TRUE	TRUE	TRUE	TRUE
2232	60	Avicennia	schaueriana	Avicennia schaueriana	-43.1081	-22.6918	South America	Brazil	Mage	Nova Orleans mangrove	TRUE	TRUE	TRUE	TRUE	TRUE	TRUE	TRUE	TRUE	TRUE	TRUE
2233	9	Avicennia	schaueriana	Avicennia schaueriana	-34.8739	-7.8075	South America	Brazil	Itamaraca Island	Paripe River	TRUE	TRUE	TRUE	TRUE	TRUE	TRUE	TRUE	TRUE	TRUE	TRUE
2234	61	Avicennia	schaueriana	Avicennia schaueriana	-43.1081	-22.6918	South America	Brazil	Mage	Nova Orleans mangrove	TRUE	TRUE	TRUE	TRUE	TRUE	TRUE	TRUE	TRUE	TRUE	TRUE
2235	6	Avicennia	schaueriana	Avicennia schaueriana	-34.9617	-8.3603	South America	Brazil	Santo Agostinho Cape	Massangana River	TRUE	TRUE	TRUE	TRUE	TRUE	TRUE	TRUE	TRUE	TRUE	TRUE
2236	201	Avicennia	schaueriana	Avicennia schaueriana	-43.0167	-22.7428	South America	Brazil	SÃ£o Goncalo	Guaxindiba River	TRUE	TRUE	TRUE	TRUE	TRUE	TRUE	TRUE	TRUE	TRUE	TRUE
2237	4	Avicennia	schaueriana	Avicennia schaueriana	-34.9617	-8.3603	South America	Brazil	Santo Agostinho Cape	Massangana River	TRUE	TRUE	TRUE	TRUE	TRUE	TRUE	TRUE	TRUE	TRUE	TRUE
2238	63	Avicennia	schaueriana	Avicennia schaueriana	-43.1081	-22.6918	South America	Brazil	Mage	Nova Orleans mangrove	TRUE	TRUE	TRUE	TRUE	TRUE	TRUE	TRUE	TRUE	TRUE	TRUE
2239	3	Avicennia	schaueriana	Avicennia schaueriana	-34.9636	-8.36	South America	Brazil	Santo Agostinho Cape	Massangana River	TRUE	TRUE	TRUE	TRUE	TRUE	TRUE	TRUE	TRUE	TRUE	TRUE
2240	6	Avicennia	schaueriana	Avicennia schaueriana	-43.6333	-23.0167	South America	Brazil	Guaratiba	Sepetiba Bay at Guaratiba Biological and Archaeological Reserve (RBAG)	TRUE	TRUE	TRUE	TRUE	TRUE	TRUE	TRUE	TRUE	TRUE	TRUE
2241	62	Avicennia	schaueriana	Avicennia schaueriana	-43.1081	-22.6918	South America	Brazil	Mage	Nova Orleans mangrove	TRUE	TRUE	TRUE	TRUE	TRUE	TRUE	TRUE	TRUE	TRUE	TRUE
2242	1	Avicennia	schaueriana	Avicennia schaueriana	-45.1641	-23.4914	South America	Brazil	Ubatuba	Dura Beach mangrove - Comprido River estuarine system	TRUE	TRUE	TRUE	TRUE	TRUE	TRUE	TRUE	TRUE	TRUE	TRUE
2243	44	Avicennia	schaueriana	Avicennia schaueriana	-43.1111	-22.6908	South America	Brazil	Mage	Surui River mangrove	TRUE	TRUE	TRUE	TRUE	TRUE	TRUE	TRUE	TRUE	TRUE	TRUE
2244	5	Avicennia	schaueriana	Avicennia schaueriana	-43.6333	-23.0167	South America	Brazil	Guaratiba	Sepetiba Bay at Guaratiba Biological and Archaeological Reserve (RBAG)	TRUE	TRUE	TRUE	TRUE	TRUE	TRUE	TRUE	TRUE	TRUE	TRUE
2245	32	Avicennia	schaueriana	Avicennia schaueriana	-43.1111	-22.6908	South America	Brazil	Mage	Surui River mangrove	TRUE	TRUE	TRUE	TRUE	TRUE	TRUE	TRUE	TRUE	TRUE	TRUE
2246	1	Avicennia	schaueriana	Avicennia schaueriana	-48.7983	-26.1333	South America	Brazil	Sao Francisco do Sul	Babitonga Bay	TRUE	TRUE	TRUE	TRUE	TRUE	TRUE	TRUE	TRUE	TRUE	TRUE
2247	2	Avicennia	schaueriana	Avicennia schaueriana	-48.7903	-26.1511	South America	Brazil	Sao Francisco do Sul	Babitonga Bay	TRUE	TRUE	TRUE	TRUE	TRUE	TRUE	TRUE	TRUE	TRUE	TRUE
2248	4	Avicennia	schaueriana	Avicennia schaueriana	-43.1125	-22.6924	South America	Brazil	Mage	Surui River lawn	TRUE	TRUE	TRUE	TRUE	TRUE	TRUE	TRUE	TRUE	TRUE	TRUE
2249	12	Avicennia	schaueriana	Avicennia schaueriana	-43.6333	-23.0167	South America	Brazil	Guaratiba	Sepetiba Bay at Guaratiba Biological and Archaeological Reserve (RBAG)	TRUE	TRUE	TRUE	TRUE	TRUE	TRUE	TRUE	TRUE	TRUE	TRUE
2250	5	Avicennia	schaueriana	Avicennia schaueriana	-43.1125	-22.6924	South America	Brazil	Mage	Surui River lawn	TRUE	TRUE	TRUE	TRUE	TRUE	TRUE	TRUE	TRUE	TRUE	TRUE
2251	3	Avicennia	schaueriana	Avicennia schaueriana	-43.1125	-22.6924	South America	Brazil	Mage	Surui River lawn	TRUE	TRUE	TRUE	TRUE	TRUE	TRUE	TRUE	TRUE	TRUE	TRUE
2252	65	Avicennia	schaueriana	Avicennia schaueriana	-43.1081	-22.6918	South America	Brazil	Mage	Nova Orleans mangrove	TRUE	TRUE	TRUE	TRUE	TRUE	TRUE	TRUE	TRUE	TRUE	TRUE
2253	1	Avicennia	schaueriana	Avicennia schaueriana	-43.6333	-23.0167	South America	Brazil	Guaratiba	Sepetiba Bay at Guaratiba Biological and Archaeological Reserve (RBAG)	TRUE	TRUE	TRUE	TRUE	TRUE	TRUE	TRUE	TRUE	TRUE	TRUE
2254	30	Avicennia	schaueriana	Avicennia schaueriana	-43.1111	-22.6908	South America	Brazil	Mage	Surui River mangrove	TRUE	TRUE	TRUE	TRUE	TRUE	TRUE	TRUE	TRUE	TRUE	TRUE
2255	31	Avicennia	schaueriana	Avicennia schaueriana	-43.1111	-22.6908	South America	Brazil	Mage	Surui River mangrove	TRUE	TRUE	TRUE	TRUE	TRUE	TRUE	TRUE	TRUE	TRUE	TRUE
2256	7	Avicennia	schaueriana	Avicennia schaueriana	-43.6333	-23.0167	South America	Brazil	Guaratiba	Sepetiba Bay at Guaratiba Biological and Archaeological Reserve (RBAG)	TRUE	TRUE	TRUE	TRUE	TRUE	TRUE	TRUE	TRUE	TRUE	TRUE
2257	79	Avicennia	schaueriana	Avicennia schaueriana	-43.1081	-22.6918	South America	Brazil	Mage	Nova Orleans mangrove	TRUE	TRUE	TRUE	TRUE	TRUE	TRUE	TRUE	TRUE	TRUE	TRUE
2258	81	Avicennia	schaueriana	Avicennia schaueriana	-43.1081	-22.6918	South America	Brazil	Mage	Nova Orleans mangrove	TRUE	TRUE	TRUE	TRUE	TRUE	TRUE	TRUE	TRUE	TRUE	TRUE
2259	80	Avicennia	schaueriana	Avicennia schaueriana	-43.1081	-22.6918	South America	Brazil	Mage	Nova Orleans mangrove	TRUE	TRUE	TRUE	TRUE	TRUE	TRUE	TRUE	TRUE	TRUE	TRUE
2260	56	Avicennia	schaueriana	Avicennia schaueriana	-43.0261	-22.6931	South America	Brazil	Guapimirim	Guapi River	TRUE	TRUE	TRUE	TRUE	TRUE	TRUE	TRUE	TRUE	TRUE	TRUE
2261	4	Avicennia	schaueriana	Avicennia schaueriana	-43.6333	-23.0167	South America	Brazil	Guaratiba	Sepetiba Bay at Guaratiba Biological and Archaeological Reserve (RBAG)	TRUE	TRUE	TRUE	TRUE	TRUE	TRUE	TRUE	TRUE	TRUE	TRUE
2262	29	Avicennia	schaueriana	Avicennia schaueriana	-43.1111	-22.6908	South America	Brazil	Mage	Surui River mangrove	TRUE	TRUE	TRUE	TRUE	TRUE	TRUE	TRUE	TRUE	TRUE	TRUE
2263	9	Avicennia	schaueriana	Avicennia schaueriana	-43.6333	-23.0167	South America	Brazil	Guaratiba	Sepetiba Bay at Guaratiba Biological and Archaeological Reserve (RBAG)	TRUE	TRUE	TRUE	TRUE	TRUE	TRUE	TRUE	TRUE	TRUE	TRUE
2264	3	Avicennia	schaueriana	Avicennia schaueriana	-43.6333	-23.0167	South America	Brazil	Guaratiba	Sepetiba Bay at Guaratiba Biological and Archaeological Reserve (RBAG)	TRUE	TRUE	TRUE	TRUE	TRUE	TRUE	TRUE	TRUE	TRUE	TRUE
2265	2	Avicennia	schaueriana	Avicennia schaueriana	-43.6333	-23.0167	South America	Brazil	Guaratiba	Sepetiba Bay at Guaratiba Biological and Archaeological Reserve (RBAG)	TRUE	TRUE	TRUE	TRUE	TRUE	TRUE	TRUE	TRUE	TRUE	TRUE
2266	82	Avicennia	schaueriana	Avicennia schaueriana	-43.1081	-22.6918	South America	Brazil	Mage	Nova Orleans mangrove	TRUE	TRUE	TRUE	TRUE	TRUE	TRUE	TRUE	TRUE	TRUE	TRUE
2267	45	Avicennia	schaueriana	Avicennia schaueriana	-43.1111	-22.6908	South America	Brazil	Mage	Surui River mangrove	TRUE	TRUE	TRUE	TRUE	TRUE	TRUE	TRUE	TRUE	TRUE	TRUE
2269	571887	Avicennia	schaueriana	Avicennia schaueriana	-43.2075	-22.9031	South America	Brazil	Rio de Janeiro	Ilha do Governador, Reserva BiolÃ³gica do Jequia	TRUE	TRUE	TRUE	TRUE	TRUE	TRUE	TRUE	TRUE	TRUE	TRUE
2270	571894	Avicennia	schaueriana	Avicennia schaueriana	-39.0833	-14.775	South America	Brazil		In Brazilia tropica.	TRUE	TRUE	TRUE	TRUE	TRUE	TRUE	TRUE	TRUE	TRUE	TRUE
2272	571886	Avicennia	schaueriana	Avicennia schaueriana	-43.2075	-22.9031	South America	Brazil	Rio de Janeiro	Avenida Brazil, entrada para PetrÃ³polis	TRUE	TRUE	TRUE	TRUE	TRUE	TRUE	TRUE	TRUE	TRUE	TRUE
2274	571888	Avicennia	schaueriana	Avicennia schaueriana	-43.2075	-22.9031	South America	Brazil	Rio de Janeiro	Ilha do Governador, Reserva BiolÃ³gica do Jequia	TRUE	TRUE	TRUE	TRUE	TRUE	TRUE	TRUE	TRUE	TRUE	TRUE
2277	571890	Avicennia	schaueriana	Avicennia schaueriana	-48.32	-25.27	South America	Brazil	GuaraqueÃ§aba	Trapiche	TRUE	TRUE	TRUE	TRUE	TRUE	TRUE	TRUE	TRUE	TRUE	TRUE
2278	573618	Avicennia	schaueriana	Avicennia schaueriana	-43.2075	-22.9031	South America	Brazil	Rio de Janeiro	Near Rio Janeiro	TRUE	TRUE	TRUE	TRUE	TRUE	TRUE	TRUE	TRUE	TRUE	TRUE
2279	573610	Avicennia	schaueriana	Avicennia schaueriana	-48.4777	-27.6526	South America	Brazil	FlorianÃ³polis	Rio Tavares, Ilha S. Catarina	TRUE	TRUE	TRUE	TRUE	TRUE	TRUE	TRUE	TRUE	TRUE	TRUE
2280	573611	Avicennia	schaueriana	Avicennia schaueriana	-48.6678	-27.6456	South America	Brazil	PalhoÃ§a	PalhoÃ§a	TRUE	TRUE	TRUE	TRUE	TRUE	TRUE	TRUE	TRUE	TRUE	TRUE
2281	573613	Avicennia	schaueriana	Avicennia schaueriana	-46.4197	-23.89	South America	Brazil	Cubatao	Cubatao	TRUE	TRUE	TRUE	TRUE	TRUE	TRUE	TRUE	TRUE	TRUE	TRUE
2282	573612	Avicennia	schaueriana	Avicennia schaueriana	-48.4777	-27.6526	South America	Brazil	FlorianÃ³polis	Rio Tavares, Ilha S. Catarina	TRUE	TRUE	TRUE	TRUE	TRUE	TRUE	TRUE	TRUE	TRUE	TRUE
2283	573614	Avicennia	schaueriana	Avicennia schaueriana	-46.33	-23.96	South America	Brazil	Santos	Santos	TRUE	TRUE	TRUE	TRUE	TRUE	TRUE	TRUE	TRUE	TRUE	TRUE
2284	573615	Avicennia	schaueriana	Avicennia schaueriana	-46.3897	-23.96	South America	Brazil	Sao Vicente	S. Vicente	TRUE	TRUE	TRUE	TRUE	TRUE	TRUE	TRUE	TRUE	TRUE	TRUE
2285	573619	Avicennia	schaueriana	Avicennia schaueriana	-38.5431	-3.7172	South America	Brazil	Fortaleza	PoÃ§o da Draga.	TRUE	TRUE	TRUE	TRUE	TRUE	TRUE	TRUE	TRUE	TRUE	TRUE
2288	573101	Avicennia	schaueriana	Avicennia schaueriana	-43.2075	-22.9031	South America	Brazil	Rio de Janeiro	Mangue prÃ³ximo ao Joquei Club da Ilha do Governador	TRUE	TRUE	TRUE	TRUE	TRUE	TRUE	TRUE	TRUE	TRUE	TRUE
2289	573609	Avicennia	schaueriana	Avicennia schaueriana	-48.4777	-27.6526	South America	Brazil	FlorianÃ³polis	Rio Tavares, Ilha S. Catarina	TRUE	TRUE	TRUE	TRUE	TRUE	TRUE	TRUE	TRUE	TRUE	TRUE
2290	571895	Avicennia	schaueriana	Avicennia schaueriana	-40.3378	-20.3194	South America	Brazil	VitÃ³ria		TRUE	TRUE	TRUE	TRUE	TRUE	TRUE	TRUE	TRUE	TRUE	TRUE
2291	571899	Avicennia	schaueriana	Avicennia schaueriana	-43.2075	-22.9031	South America	Brazil	Rio de Janeiro	JacarepaguÃ¡	TRUE	TRUE	TRUE	TRUE	TRUE	TRUE	TRUE	TRUE	TRUE	TRUE
2292	573608	Avicennia	schaueriana	Avicennia schaueriana	-48.4935	-27.5943	South America	Brazil	FlorianÃ³polis	In insula Florianopolis	TRUE	TRUE	TRUE	TRUE	TRUE	TRUE	TRUE	TRUE	TRUE	TRUE
2293	571898	Avicennia	schaueriana	Avicennia schaueriana	-39.0833	-14.775	South America	Brazil		In Brazilia tropica.	TRUE	TRUE	TRUE	TRUE	TRUE	TRUE	TRUE	TRUE	TRUE	TRUE
2294	573103	Avicennia	schaueriana	Avicennia schaueriana	-43.2075	-22.9031	South America	Brazil	Rio de Janeiro	Laguna de S. Christovao	TRUE	TRUE	TRUE	TRUE	TRUE	TRUE	TRUE	TRUE	TRUE	TRUE
2296	573607	Avicennia	schaueriana	Avicennia schaueriana	-48.6678	-27.6456	South America	Brazil	PalhoÃ§a	PalhoÃ§a	TRUE	TRUE	TRUE	TRUE	TRUE	TRUE	TRUE	TRUE	TRUE	TRUE
2299	573104	Avicennia	schaueriana	Avicennia schaueriana	-42.3431	-22.8731	South America	Brazil	Araruama	Lagoa de Araruama, nas margens da EnseÃ¡da das Gaivotas	TRUE	TRUE	TRUE	TRUE	TRUE	TRUE	TRUE	TRUE	TRUE	TRUE
2300	571897	Avicennia	schaueriana	Avicennia schaueriana	-34.8808	-8.0542	South America	Brazil	Recife	Recife	TRUE	TRUE	TRUE	TRUE	TRUE	TRUE	TRUE	TRUE	TRUE	TRUE
2302	573105	Avicennia	schaueriana	Avicennia schaueriana	-43.2075	-22.9031	South America	Brazil	Rio de Janeiro	Av. das AmÃ©ricas, km 29	TRUE	TRUE	TRUE	TRUE	TRUE	TRUE	TRUE	TRUE	TRUE	TRUE
2304	131330	Avicennia	schaueriana	Avicennia schaueriana	-43.272	-22.7659	South America	Brazil	Duque de Caxias	Fragmento 65 (TAV). Manguezal degradado.	TRUE	TRUE	TRUE	TRUE	TRUE	TRUE	TRUE	TRUE	TRUE	TRUE
2305	51589	Avicennia	schaueriana	Avicennia schaueriana	-47.9228	-25.0729	South America	Brazil	CananÃ©ia	Ilha do Cardoso	TRUE	TRUE	TRUE	TRUE	TRUE	TRUE	TRUE	TRUE	TRUE	TRUE
2306	6789	Avicennia	schaueriana	Avicennia schaueriana	-48.5558	-25.5917	South America	Brazil	ParanaguÃ¡	Parque Estadual do Palmito	TRUE	TRUE	TRUE	TRUE	TRUE	TRUE	TRUE	TRUE	TRUE	TRUE
2307	7445	Avicennia	schaueriana	Avicennia schaueriana	-48.5558	-25.5917	South America	Brazil	ParanaguÃ¡	Floresta estadual do Palmito.	TRUE	TRUE	TRUE	TRUE	TRUE	TRUE	TRUE	TRUE	TRUE	TRUE
2315	45193	Avicennia	schaueriana	Avicennia schaueriana	-37.1397	-4.96361	South America	Brazil	Areia Branca	Em frente ao ministÃ©rio dos transportes, foz do ri	TRUE	TRUE	TRUE	TRUE	TRUE	TRUE	TRUE	TRUE	TRUE	TRUE
2317	87182	Avicennia	schaueriana	Avicennia schaueriana	-35.8353	-7.67444	South America	Brazil	Goiana	EstuÃ¡rio de Ipessoca, prÃ³ximo a Barra de Catuama.	TRUE	TRUE	TRUE	TRUE	TRUE	TRUE	TRUE	TRUE	TRUE	TRUE
2324	8146	Avicennia	schaueriana	Avicennia schaueriana	-46.3169	-23.9208	South America	Brazil	Santos	SÃ­tio Sandi. DoaÃ§Ã£o Embraport.	TRUE	TRUE	TRUE	TRUE	TRUE	TRUE	TRUE	TRUE	TRUE	TRUE
2326	13103	Avicennia	schaueriana	Avicennia schaueriana	-46.7833	-24.1667	South America	Brazil	Itanhaem	Mangue e restinga	TRUE	TRUE	TRUE	TRUE	TRUE	TRUE	TRUE	TRUE	TRUE	TRUE
2331	1545	Avicennia	schaueriana	Avicennia schaueriana	-40.3375	-20.3197	South America	Brazil	VitÃ³ria	EstaÃ§Ã£o 6 D, Manguezal.	TRUE	TRUE	TRUE	TRUE	TRUE	TRUE	TRUE	TRUE	TRUE	TRUE
2333	1573	Avicennia	schaueriana	Avicennia schaueriana	-40.3375	-20.3197	South America	Brazil	VitÃ³ria		TRUE	TRUE	TRUE	TRUE	TRUE	TRUE	TRUE	TRUE	TRUE	TRUE
2334	17316	Avicennia	schaueriana	Avicennia schaueriana	-40.7217	-20.8381	South America	Brazil	Anchieta	Manguezal.	TRUE	TRUE	TRUE	TRUE	TRUE	TRUE	TRUE	TRUE	TRUE	TRUE
2335	19650	Avicennia	schaueriana	Avicennia schaueriana	-40.6174	-20.5517	South America	Brazil	Cariacica		TRUE	TRUE	TRUE	TRUE	TRUE	TRUE	TRUE	TRUE	TRUE	TRUE
2336	290	Avicennia	schaueriana	Avicennia schaueriana	-40.3042	-20.2767	South America	Brazil	VitÃ³ria	Campus da UFES - Goiabeiras, Manguezal.	TRUE	TRUE	TRUE	TRUE	TRUE	TRUE	TRUE	TRUE	TRUE	TRUE
2337	29833	Avicennia	schaueriana	Avicennia schaueriana	-39.7332	-18.559	South America	Brazil	ConceiÃ§Ã£o da Barra	Praia da Guaxindiba, Ilhota em estuÃ¡rio.	TRUE	TRUE	TRUE	TRUE	TRUE	TRUE	TRUE	TRUE	TRUE	TRUE
2339	5783	Avicennia	schaueriana	Avicennia schaueriana	-40.4197	-20.2642	South America	Brazil	Cariacica	Foz do Rio Bubu, RegiÃ£o de transiÃ§Ã£o entre mangue e tabuleiro.	TRUE	TRUE	TRUE	TRUE	TRUE	TRUE	TRUE	TRUE	TRUE	TRUE
2341	725	Avicennia	schaueriana	Avicennia schaueriana	-40.3375	-20.3197	South America	Brazil	VitÃ³ria		TRUE	TRUE	TRUE	TRUE	TRUE	TRUE	TRUE	TRUE	TRUE	TRUE
2342	5297	Avicennia	schaueriana	Avicennia schaueriana	-37.1369	-4.95611	South America	Brazil	Areia Branca	Foz do rio MossorÃ³.	TRUE	TRUE	TRUE	TRUE	TRUE	TRUE	TRUE	TRUE	TRUE	TRUE
2343	5300	Avicennia	schaueriana	Avicennia schaueriana	-37.1369	-4.95611	South America	Brazil	Areia Branca	Foz do rio MossorÃ³.	TRUE	TRUE	TRUE	TRUE	TRUE	TRUE	TRUE	TRUE	TRUE	TRUE
2344	5312	Avicennia	schaueriana	Avicennia schaueriana	-37.1369	-4.95361	South America	Brazil	Areia Branca	Foz do rio MossorÃ³.	TRUE	TRUE	TRUE	TRUE	TRUE	TRUE	TRUE	TRUE	TRUE	TRUE
2345	9699	Avicennia	schaueriana	Avicennia schaueriana	-37.1397	-4.96361	South America	Brazil	Areia Branca	Foz do Rio MossorÃ³.	TRUE	TRUE	TRUE	TRUE	TRUE	TRUE	TRUE	TRUE	TRUE	TRUE
2416	524	Avicennia	schaueriana	Avicennia schaueriana	-43.2167	-22.9	South America	Brazil			TRUE	TRUE	TRUE	TRUE	TRUE	TRUE	TRUE	TRUE	TRUE	TRUE
2421	10176	Avicennia	schaueriana	Avicennia schaueriana	-37.5433	-11.7786	South America	Brazil	Conde		TRUE	TRUE	TRUE	TRUE	TRUE	TRUE	TRUE	TRUE	TRUE	TRUE
2424	4149	Avicennia	schaueriana	Avicennia schaueriana	-37.1572	-4.96306	South America	Brazil	Areia Branca	Salina Augusto Severo	TRUE	TRUE	TRUE	TRUE	TRUE	TRUE	TRUE	TRUE	TRUE	TRUE
2425	4166	Avicennia	schaueriana	Avicennia schaueriana	-37.1487	-5	South America	Brazil	Grossos	Salina Caenga	TRUE	TRUE	TRUE	TRUE	TRUE	TRUE	TRUE	TRUE	TRUE	TRUE
2426	9520	Avicennia	schaueriana	Avicennia schaueriana	-37.1397	-4.96361	South America	Brazil	Areia Branca	Em frente ao MinistÃ©rio dos Transportes, foz do rio MossorÃ³.	TRUE	TRUE	TRUE	TRUE	TRUE	TRUE	TRUE	TRUE	TRUE	TRUE
2432	112948	Avicennia	schaueriana	Avicennia schaueriana	-39	-14.1	South America	Brazil	MaraÃº	Litoral Sul, Ilha de Quiepe.	TRUE	TRUE	TRUE	TRUE	TRUE	TRUE	TRUE	TRUE	TRUE	TRUE
2433	112984	Avicennia	schaueriana	Avicennia schaueriana	-39	-14.1	South America	Brazil	MaraÃº	Litoral Sul, Taipu de Dentro.	TRUE	TRUE	TRUE	TRUE	TRUE	TRUE	TRUE	TRUE	TRUE	TRUE
2435	69741	Avicennia	schaueriana	Avicennia schaueriana	-38.3167	-12.6833	South America	Brazil	CamaÃ§ari	RegiÃ£o Metropolitana Salvador, Rio JacuÃ­pe	TRUE	TRUE	TRUE	TRUE	TRUE	TRUE	TRUE	TRUE	TRUE	TRUE
2436	75143	Avicennia	schaueriana	Avicennia schaueriana	-38.95	-12.6167	South America	Brazil	Cachoeira	RecÃ´ncavo Sul, Cachoeira do Sossego	TRUE	TRUE	TRUE	TRUE	TRUE	TRUE	TRUE	TRUE	TRUE	TRUE
2438	99425	Avicennia	schaueriana	Avicennia schaueriana	-38.5028	-12.7556	South America	Brazil	Candeias	RegiÃ£o Metropolitana Salvador, PrÃ³ximo Ã cidade de Caboto, nas imediaÃ§Ãµes do Porto de Aratu	TRUE	TRUE	TRUE	TRUE	TRUE	TRUE	TRUE	TRUE	TRUE	TRUE
2440	22228	Avicennia	schaueriana	Avicennia schaueriana	-48.5173	-27.5775	South America	Brazil	FlorianÃ³polis	Manguezal do Itacorubi	TRUE	TRUE	TRUE	TRUE	TRUE	TRUE	TRUE	TRUE	TRUE	TRUE
2441	22667	Avicennia	schaueriana	Avicennia schaueriana	-48.5189	-27.5772	South America	Brazil	FlorianÃ³polis	Avenida das Saudades	TRUE	TRUE	TRUE	TRUE	TRUE	TRUE	TRUE	TRUE	TRUE	TRUE
2442	30452	Avicennia	schaueriana	Avicennia schaueriana	-48.6583	-27.6403	South America	Brazil	PalhoÃ§a	Centro; Av. Aniceto Zacchi	TRUE	TRUE	TRUE	TRUE	TRUE	TRUE	TRUE	TRUE	TRUE	TRUE
2447	44347	Avicennia	schaueriana	Avicennia schaueriana	-48.5275	-27.6261	South America	Brazil	FlorianÃ³polis	Aterro da BaÃ­a Sul	TRUE	TRUE	TRUE	TRUE	TRUE	TRUE	TRUE	TRUE	TRUE	TRUE
2451	608	Avicennia	schaueriana	Avicennia schaueriana	-49.0718	-26.9215	South America	Brazil	Blumenau	Parque Natural Municipal SÃ£o Francisco de Assis	TRUE	TRUE	TRUE	TRUE	TRUE	TRUE	TRUE	TRUE	TRUE	TRUE
2456	34007	Avicennia	schaueriana	Avicennia schaueriana	-38.7072	-12.995	South America	Brazil	Vera Cruz	Ca. de 190Km da cidade de Feira de Santana-Ba.	TRUE	TRUE	TRUE	TRUE	TRUE	TRUE	TRUE	TRUE	TRUE	TRUE
2458	100039	Avicennia	schaueriana	Avicennia schaueriana	-41.829	-2.78647	South America	Brazil	ParanaÃ­ba	ao longo do Delta do Rio ParnaÃ­ba	TRUE	TRUE	TRUE	TRUE	TRUE	TRUE	TRUE	TRUE	TRUE	TRUE
2459	115375	Avicennia	schaueriana	Avicennia schaueriana	-47.8056	-24.895	South America	Brazil	Ilha Comprida	Pedrinhas	TRUE	TRUE	TRUE	TRUE	TRUE	TRUE	TRUE	TRUE	TRUE	TRUE
2460	148406	Avicennia	schaueriana	Avicennia schaueriana	-38.7079	-12.9976	South America	Brazil	Vera Cruz	Baiacu, prÃ³ximo ao porto de Baiacu	TRUE	TRUE	TRUE	TRUE	TRUE	TRUE	TRUE	TRUE	TRUE	TRUE
2461	148416	Avicennia	schaueriana	Avicennia schaueriana	-38.7079	-12.9976	South America	Brazil	Vera Cruz	PrÃ³ximo ao porto de BaiacÃº, 0-1 msm.	TRUE	TRUE	TRUE	TRUE	TRUE	TRUE	TRUE	TRUE	TRUE	TRUE
2462	148416	Avicennia	schaueriana	Avicennia schaueriana	-38.7079	-12.9976	South America	Brazil	Vera Cruz	PrÃ³ximo ao porto de BaiacÃº, 0-1 msm.	TRUE	TRUE	TRUE	TRUE	TRUE	TRUE	TRUE	TRUE	TRUE	TRUE
2463	148416	Avicennia	schaueriana	Avicennia schaueriana	-38.7079	-12.9976	South America	Brazil	Vera Cruz	Baiacu, prÃ³ximo ao porto de Baiacu	TRUE	TRUE	TRUE	TRUE	TRUE	TRUE	TRUE	TRUE	TRUE	TRUE
2464	148423	Avicennia	schaueriana	Avicennia schaueriana	-38.7079	-12.9976	South America	Brazil	Vera Cruz	Baiacu, prÃ³ximo ao porto de Baiacu	TRUE	TRUE	TRUE	TRUE	TRUE	TRUE	TRUE	TRUE	TRUE	TRUE
2465	148423	Avicennia	schaueriana	Avicennia schaueriana	-38.7079	-12.9976	South America	Brazil	Vera Cruz	PrÃ³ximo ao porto de Baiacu, 0-1 msm.	TRUE	TRUE	TRUE	TRUE	TRUE	TRUE	TRUE	TRUE	TRUE	TRUE
2466	148428	Avicennia	schaueriana	Avicennia schaueriana	-38.7077	-12.9934	South America	Brazil	Vera Cruz	Baiacu, prÃ³ximo ao porto de Baiacu	TRUE	TRUE	TRUE	TRUE	TRUE	TRUE	TRUE	TRUE	TRUE	TRUE
2467	148428	Avicennia	schaueriana	Avicennia schaueriana	-38.7077	-12.9934	South America	Brazil	Vera Cruz	PrÃ³ximo ao porto de BaiacÃº, 0-1 msm.	TRUE	TRUE	TRUE	TRUE	TRUE	TRUE	TRUE	TRUE	TRUE	TRUE
2468	148429	Avicennia	schaueriana	Avicennia schaueriana	-38.7077	-12.9934	South America	Brazil	Vera Cruz	Baiacu, prÃ³ximo ao porto de Baiacu	TRUE	TRUE	TRUE	TRUE	TRUE	TRUE	TRUE	TRUE	TRUE	TRUE
2469	148429	Avicennia	schaueriana	Avicennia schaueriana	-38.7077	-12.9934	South America	Brazil	Vera Cruz	PrÃ³ximo ao porto de BaiacÃº, 0-1 msm.	TRUE	TRUE	TRUE	TRUE	TRUE	TRUE	TRUE	TRUE	TRUE	TRUE
2480	148437	Avicennia	schaueriana	Avicennia schaueriana	-38.7077	-12.9934	South America	Brazil	Vera Cruz	PrÃ³ximo ao porto de BaiacÃº, 0-1 msm.	TRUE	TRUE	TRUE	TRUE	TRUE	TRUE	TRUE	TRUE	TRUE	TRUE
2481	148437	Avicennia	schaueriana	Avicennia schaueriana	-38.7077	-12.9934	South America	Brazil	Vera Cruz	Baiacu, prÃ³ximo ao porto de Baiacu	TRUE	TRUE	TRUE	TRUE	TRUE	TRUE	TRUE	TRUE	TRUE	TRUE
2482	148438	Avicennia	schaueriana	Avicennia schaueriana	-38.7077	-12.9934	South America	Brazil	Vera Cruz	Baiacu, prÃ³ximo ao porto de Baiacu	TRUE	TRUE	TRUE	TRUE	TRUE	TRUE	TRUE	TRUE	TRUE	TRUE
2483	148438	Avicennia	schaueriana	Avicennia schaueriana	-38.7077	-12.9934	South America	Brazil	Vera Cruz	PrÃ³ximo ao porto de baiacÃº, 0-1 msm.	TRUE	TRUE	TRUE	TRUE	TRUE	TRUE	TRUE	TRUE	TRUE	TRUE
2484	148439	Avicennia	schaueriana	Avicennia schaueriana	-38.7062	-12.9986	South America	Brazil	Vera Cruz	PrÃ³ximo ao porto de BaiacÃº, 0-1 msm.	TRUE	TRUE	TRUE	TRUE	TRUE	TRUE	TRUE	TRUE	TRUE	TRUE
2485	148439	Avicennia	schaueriana	Avicennia schaueriana	-38.7062	-12.9986	South America	Brazil	Vera Cruz	Baiacu, prÃ³ximo ao porto de Baiacu	TRUE	TRUE	TRUE	TRUE	TRUE	TRUE	TRUE	TRUE	TRUE	TRUE
2486	148440	Avicennia	schaueriana	Avicennia schaueriana	-38.7077	-12.9934	South America	Brazil	Vera Cruz	PrÃ³ximo ao porto de BaiacÃº, 0-1 msm.	TRUE	TRUE	TRUE	TRUE	TRUE	TRUE	TRUE	TRUE	TRUE	TRUE
2487	148440	Avicennia	schaueriana	Avicennia schaueriana	-38.7077	-12.9934	South America	Brazil	Vera Cruz	Baiacu, prÃ³ximo ao porto de Baiacu	TRUE	TRUE	TRUE	TRUE	TRUE	TRUE	TRUE	TRUE	TRUE	TRUE
2488	148441	Avicennia	schaueriana	Avicennia schaueriana	-38.7062	-12.9986	South America	Brazil	Vera Cruz	Baiacu, prÃ³ximo ao porto de Baiacu	TRUE	TRUE	TRUE	TRUE	TRUE	TRUE	TRUE	TRUE	TRUE	TRUE
2489	148441	Avicennia	schaueriana	Avicennia schaueriana	-38.7062	-12.9986	South America	Brazil	Vera Cruz	PrÃ³ximo ao porto de BaiacÃº, 0-1 msm.	TRUE	TRUE	TRUE	TRUE	TRUE	TRUE	TRUE	TRUE	TRUE	TRUE
2490	148442	Avicennia	schaueriana	Avicennia schaueriana	-38.7062	-12.9986	South America	Brazil	Vera Cruz	Baiacu, prÃ³ximo ao porto de Baiacu	TRUE	TRUE	TRUE	TRUE	TRUE	TRUE	TRUE	TRUE	TRUE	TRUE
2491	148442	Avicennia	schaueriana	Avicennia schaueriana	-38.7062	-12.9986	South America	Brazil	Vera Cruz	PrÃ³ximo ao porto de BaiacÃº, 0-1 msm.	TRUE	TRUE	TRUE	TRUE	TRUE	TRUE	TRUE	TRUE	TRUE	TRUE
2492	148443	Avicennia	schaueriana	Avicennia schaueriana	-38.7079	-12.9976	South America	Brazil	Vera Cruz	Baiacu, prÃ³ximo ao porto de Baiacu	TRUE	TRUE	TRUE	TRUE	TRUE	TRUE	TRUE	TRUE	TRUE	TRUE
2493	148443	Avicennia	schaueriana	Avicennia schaueriana	-38.7079	-12.9976	South America	Brazil	Vera Cruz	PrÃ³ximo ao porto de BaiacÃº, 0-1 msm.	TRUE	TRUE	TRUE	TRUE	TRUE	TRUE	TRUE	TRUE	TRUE	TRUE
2494	148444	Avicennia	schaueriana	Avicennia schaueriana	-38.7079	-12.9976	South America	Brazil	Vera Cruz	Baiacu, prÃ³ximo ao porto de Baiacu	TRUE	TRUE	TRUE	TRUE	TRUE	TRUE	TRUE	TRUE	TRUE	TRUE
2495	148444	Avicennia	schaueriana	Avicennia schaueriana	-38.7079	-12.9976	South America	Brazil	Vera Cruz	PrÃ³ximo ao porto de BaiacÃº, 0-1 msm.	TRUE	TRUE	TRUE	TRUE	TRUE	TRUE	TRUE	TRUE	TRUE	TRUE
2496	148445	Avicennia	schaueriana	Avicennia schaueriana	-38.7077	-12.9934	South America	Brazil	Vera Cruz	Baiacu, prÃ³ximo ao porto de Baiacu	TRUE	TRUE	TRUE	TRUE	TRUE	TRUE	TRUE	TRUE	TRUE	TRUE
2497	148445	Avicennia	schaueriana	Avicennia schaueriana	-38.7077	-12.9934	South America	Brazil	Vera Cruz	PrÃ³ximo ao porto de BaiacÃº, 0-1 msm.	TRUE	TRUE	TRUE	TRUE	TRUE	TRUE	TRUE	TRUE	TRUE	TRUE
2498	148446	Avicennia	schaueriana	Avicennia schaueriana	-43.2116	-22.6897	South America	Brazil	Guapimirim	APA de Guapimirim 0-1 msm.	TRUE	TRUE	TRUE	TRUE	TRUE	TRUE	TRUE	TRUE	TRUE	TRUE
2499	148446	Avicennia	schaueriana	Avicennia schaueriana	-43.2116	-22.6897	South America	Brazil	Guapimirim	APA de Guapimirim	TRUE	TRUE	TRUE	TRUE	TRUE	TRUE	TRUE	TRUE	TRUE	TRUE
2500	14845	Avicennia	schaueriana	Avicennia schaueriana	-48.5233	-27.5797	South America	Brazil	FlorianÃ³polis	Reserva do Itacorubi, prÃ³ximo Ã pista de corrida	TRUE	TRUE	TRUE	TRUE	TRUE	TRUE	TRUE	TRUE	TRUE	TRUE
2501	148450	Avicennia	schaueriana	Avicennia schaueriana	-42.9997	-22.7023	South America	Brazil	Guapimirim	APA de Guapimirim	TRUE	TRUE	TRUE	TRUE	TRUE	TRUE	TRUE	TRUE	TRUE	TRUE
2502	148450	Avicennia	schaueriana	Avicennia schaueriana	-42.9997	-22.7023	South America	Brazil	Guapimirim	APA de Guapimirim 0-1 msm.	TRUE	TRUE	TRUE	TRUE	TRUE	TRUE	TRUE	TRUE	TRUE	TRUE
2503	148455	Avicennia	schaueriana	Avicennia schaueriana	-48.5233	-27.5797	South America	Brazil	FlorianÃ³polis	Reserva do Itacorubi PrÃ³ximo Ã pista de corrida, 0-1 msm.	TRUE	TRUE	TRUE	TRUE	TRUE	TRUE	TRUE	TRUE	TRUE	TRUE
2504	148456	Avicennia	schaueriana	Avicennia schaueriana	-48.5219	-27.5925	South America	Brazil	FlorianÃ³polis	Reserva do Itacorubi PrÃ³ximo Ã pista de corrida, 0-1 msm.	TRUE	TRUE	TRUE	TRUE	TRUE	TRUE	TRUE	TRUE	TRUE	TRUE
2505	148456	Avicennia	schaueriana	Avicennia schaueriana	-48.5219	-27.5925	South America	Brazil	FlorianÃ³polis	Reserva do Itacorubi, prÃ³ximo Ã pista de corrida	TRUE	TRUE	TRUE	TRUE	TRUE	TRUE	TRUE	TRUE	TRUE	TRUE
2506	148457	Avicennia	schaueriana	Avicennia schaueriana	-48.5219	-27.5926	South America	Brazil	FlorianÃ³polis	Reserva do Itacorubi PrÃ³ximo Ã¡ pista de corrida, 0-1 msm.	TRUE	TRUE	TRUE	TRUE	TRUE	TRUE	TRUE	TRUE	TRUE	TRUE
2507	148457	Avicennia	schaueriana	Avicennia schaueriana	-48.5219	-27.5926	South America	Brazil	FlorianÃ³polis	Reserva do Itacorubi, prÃ³ximo Ã pista de corrida	TRUE	TRUE	TRUE	TRUE	TRUE	TRUE	TRUE	TRUE	TRUE	TRUE
2508	148458	Avicennia	schaueriana	Avicennia schaueriana	-48.5219	-27.5926	South America	Brazil	FlorianÃ³polis	Reserva do Itacorubi, prÃ³ximo Ã pista de corrida	TRUE	TRUE	TRUE	TRUE	TRUE	TRUE	TRUE	TRUE	TRUE	TRUE
2509	148458	Avicennia	schaueriana	Avicennia schaueriana	-48.5219	-27.5926	South America	Brazil	FlorianÃ³polis	Reserva do Itacorubi PrÃ³ximo Ã pista de corrida, 0-1 msm.	TRUE	TRUE	TRUE	TRUE	TRUE	TRUE	TRUE	TRUE	TRUE	TRUE
2510	148459	Avicennia	schaueriana	Avicennia schaueriana	-48.5219	-27.5925	South America	Brazil	FlorianÃ³polis	Reserva do Itacorubi Proximo Ã pista de corrida, 0-1msm.	TRUE	TRUE	TRUE	TRUE	TRUE	TRUE	TRUE	TRUE	TRUE	TRUE
2511	148459	Avicennia	schaueriana	Avicennia schaueriana	-48.5219	-27.5925	South America	Brazil	FlorianÃ³polis	Reserva do Itacorubi, prÃ³ximo Ã pista de corrida	TRUE	TRUE	TRUE	TRUE	TRUE	TRUE	TRUE	TRUE	TRUE	TRUE
2516	154234	Avicennia	schaueriana	Avicennia schaueriana	-45.165	-23.4894	South America	Brazil	Ubatuba	Rio Escuro, prÃ³ximo Ã ponte do Rio Escuro	TRUE	TRUE	TRUE	TRUE	TRUE	TRUE	TRUE	TRUE	TRUE	TRUE
2517	154234	Avicennia	schaueriana	Avicennia schaueriana	-45.165	-23.4894	South America	Brazil	Ubatuba	PrÃ³ximo Ã ponte do Rio Escuro, 0-1 msm.	TRUE	TRUE	TRUE	TRUE	TRUE	TRUE	TRUE	TRUE	TRUE	TRUE
2518	154241	Avicennia	schaueriana	Avicennia schaueriana	-39.0576	-3.41289	South America	Brazil	Paracuru	ao longo do manguezal de Paracuru	TRUE	TRUE	TRUE	TRUE	TRUE	TRUE	TRUE	TRUE	TRUE	TRUE
2519	154241	Avicennia	schaueriana	Avicennia schaueriana	-39.0576	-3.41292	South America	Brazil	Paracuru	Ao longo do manguezal de ParacurÃº, 0-1 msm.	TRUE	TRUE	TRUE	TRUE	TRUE	TRUE	TRUE	TRUE	TRUE	TRUE
2520	154242	Avicennia	schaueriana	Avicennia schaueriana	-39.0562	-3.41297	South America	Brazil	Paracuru	ao longo do manguezal de Paracuru	TRUE	TRUE	TRUE	TRUE	TRUE	TRUE	TRUE	TRUE	TRUE	TRUE
2521	154242	Avicennia	schaueriana	Avicennia schaueriana	-39.0562	-3.41297	South America	Brazil	Paracuru	Ao longo do manguezal de Paracuru, 0-1 msm.	TRUE	TRUE	TRUE	TRUE	TRUE	TRUE	TRUE	TRUE	TRUE	TRUE
2525	1077263351	Avicennia	schaueriana	Avicennia schaueriana	-40.511	-20.658	South America	Brazil	Guarapari		TRUE	TRUE	TRUE	TRUE	TRUE	TRUE	TRUE	TRUE	TRUE	TRUE
2527	1077401292	Avicennia	schaueriana	Avicennia schaueriana	-48.5173	-27.5775	South America	Brazil	FlorianÃ³polis	Manguezal do Itacorubi	TRUE	TRUE	TRUE	TRUE	TRUE	TRUE	TRUE	TRUE	TRUE	TRUE
2532	1077546976	Avicennia	schaueriana	Avicennia schaueriana	-34.8811	-8.05389	South America	Brazil	Recife	Dois IrmÃ£os	TRUE	TRUE	TRUE	TRUE	TRUE	TRUE	TRUE	TRUE	TRUE	TRUE
2537	1077511008	Avicennia	schaueriana	Avicennia schaueriana	-34.8811	-8.05389	South America	Brazil	Recife	Imbiribeira, nos pÃ¢ntanos salgados.	TRUE	TRUE	TRUE	TRUE	TRUE	TRUE	TRUE	TRUE	TRUE	TRUE
2538	1077515077	Avicennia	schaueriana	Avicennia schaueriana	-34.8811	-8.05389	South America	Brazil	Recife	Imbiribeira, no mangue.	TRUE	TRUE	TRUE	TRUE	TRUE	TRUE	TRUE	TRUE	TRUE	TRUE
2539	1077211990	Avicennia	schaueriana	Avicennia schaueriana	-39.0753	-15.2933	South America	Brazil	Una	Ilha do desejo, nas margens da BA 01.	TRUE	TRUE	TRUE	TRUE	TRUE	TRUE	TRUE	TRUE	TRUE	TRUE
2541	1077379682	Avicennia	schaueriana	Avicennia schaueriana	-49.0718	-26.9215	South America	Brazil	Blumenau	Parque Natural Municipal SÃ£o Francisco de Assis	TRUE	TRUE	TRUE	TRUE	TRUE	TRUE	TRUE	TRUE	TRUE	TRUE
2543	1077409480	Avicennia	schaueriana	Avicennia schaueriana	-48.6583	-27.6403	South America	Brazil	PalhoÃ§a	Centro; Av. Aniceto Zacchi	TRUE	TRUE	TRUE	TRUE	TRUE	TRUE	TRUE	TRUE	TRUE	TRUE
2544	1077401747	Avicennia	schaueriana	Avicennia schaueriana	-48.5189	-27.5772	South America	Brazil	FlorianÃ³polis	Avenida das Saudades	TRUE	TRUE	TRUE	TRUE	TRUE	TRUE	TRUE	TRUE	TRUE	TRUE
2552	1077197709	Avicennia	schaueriana	Avicennia schaueriana	-38.6086	-12.9603	South America	Brazil	Vera Cruz	Jeribatuba.	TRUE	TRUE	TRUE	TRUE	TRUE	TRUE	TRUE	TRUE	TRUE	TRUE
2554	1077196505	Avicennia	schaueriana	Avicennia schaueriana	-38.6086	-12.9603	South America	Brazil	Vera Cruz	Distrito de Chacha Pregos, Mangue do LimÃ£o - Canal de Itapecirica, Bom Jardim.	TRUE	TRUE	TRUE	TRUE	TRUE	TRUE	TRUE	TRUE	TRUE	TRUE
2557	1077261171	Avicennia	schaueriana	Avicennia schaueriana	-40.7219	-20.8378	South America	Brazil	PiÃºma	PiÃºma - Espirito Santo.	TRUE	TRUE	TRUE	TRUE	TRUE	TRUE	TRUE	TRUE	TRUE	TRUE
2559	1020341040	Avicennia	schaueriana	Avicennia schaueriana	-48.8167	-25.4667	South America	Brazil			TRUE	TRUE	TRUE	TRUE	TRUE	TRUE	TRUE	TRUE	TRUE	TRUE
2563	1020340982	Avicennia	schaueriana	Avicennia schaueriana	-43.2167	-22.9	South America	Brazil			TRUE	TRUE	TRUE	TRUE	TRUE	TRUE	TRUE	TRUE	TRUE	TRUE
2566	1020341030	Avicennia	schaueriana	Avicennia schaueriana	-48.8167	-25.4667	South America	Brazil			TRUE	TRUE	TRUE	TRUE	TRUE	TRUE	TRUE	TRUE	TRUE	TRUE
2567	1077232378	Avicennia	schaueriana	Avicennia schaueriana	-38.3242	-12.6975	South America	Brazil	CamaÃ§ari	RegiÃ£o Metropolitana Salvador, Barra do JacuÃ­pe	TRUE	TRUE	TRUE	TRUE	TRUE	TRUE	TRUE	TRUE	TRUE	TRUE
2568	1077222152	Avicennia	schaueriana	Avicennia schaueriana	-38.3167	-12.6833	South America	Brazil	CamaÃ§ari	RegiÃ£o Metropolitana Salvador, Rio JacuÃ­pe	TRUE	TRUE	TRUE	TRUE	TRUE	TRUE	TRUE	TRUE	TRUE	TRUE
2569	1077224995	Avicennia	schaueriana	Avicennia schaueriana	-38.95	-12.6167	South America	Brazil	Cachoeira	RecÃ´ncavo Sul, Cachoeira do Sossego	TRUE	TRUE	TRUE	TRUE	TRUE	TRUE	TRUE	TRUE	TRUE	TRUE
2573	1077423408	Avicennia	schaueriana	Avicennia schaueriana	-48.5275	-27.6261	South America	Brazil	FlorianÃ³polis	Aterro da BaÃ­a Sul	TRUE	TRUE	TRUE	TRUE	TRUE	TRUE	TRUE	TRUE	TRUE	TRUE
2576	1077579347	Avicennia	schaueriana	Avicennia schaueriana	-37.1369	-4.95611	South America	Brazil	Areia Branca	Salina Augusto Severo	TRUE	TRUE	TRUE	TRUE	TRUE	TRUE	TRUE	TRUE	TRUE	TRUE
2577	1077580415	Avicennia	schaueriana	Avicennia schaueriana	-35.8353	-7.67444	South America	Brazil	Goiana	EstuÃ¡rio de Ipessoca, prÃ³ximo a Barra de Catuama.	TRUE	TRUE	TRUE	TRUE	TRUE	TRUE	TRUE	TRUE	TRUE	TRUE
2579	1077581334	Avicennia	schaueriana	Avicennia schaueriana	-34.8811	-8.05389	South America	Brazil	Recife	Pina, ao lado da ponte Paulo Guerra, prÃ³ximo ao Rio Capibaribe.	TRUE	TRUE	TRUE	TRUE	TRUE	TRUE	TRUE	TRUE	TRUE	TRUE
2580	1077605874	Avicennia	schaueriana	Avicennia schaueriana	-37.1369	-4.95611	South America	Brazil	Areia Branca	Foz do Rio MossorÃ³-Em frente ao ministÃ©rio dos transportes.	TRUE	TRUE	TRUE	TRUE	TRUE	TRUE	TRUE	TRUE	TRUE	TRUE
2581	1077238406	Avicennia	schaueriana	Avicennia schaueriana	-38.5028	-12.7556	South America	Brazil	Candeias	RegiÃ£o Metropolitana Salvador, PrÃ³ximo Ã cidade de Caboto, nas imediaÃ§Ãµes do Porto de Aratu	TRUE	TRUE	TRUE	TRUE	TRUE	TRUE	TRUE	TRUE	TRUE	TRUE
2585	1077245920	Avicennia	schaueriana	Avicennia schaueriana	-39	-14.1	South America	Brazil	MaraÃº	Litoral Sul, Ilha de Quiepe.	TRUE	TRUE	TRUE	TRUE	TRUE	TRUE	TRUE	TRUE	TRUE	TRUE
2586	1077245923	Avicennia	schaueriana	Avicennia schaueriana	-39	-14.1	South America	Brazil	MaraÃº	Litoral Sul, Taipu de Dentro.	TRUE	TRUE	TRUE	TRUE	TRUE	TRUE	TRUE	TRUE	TRUE	TRUE
2587	1077255997	Avicennia	schaueriana	Avicennia schaueriana	-41.945	-22.5269	South America	Brazil	Rio das Ostras	Rio das Ostras - RJ.	TRUE	TRUE	TRUE	TRUE	TRUE	TRUE	TRUE	TRUE	TRUE	TRUE
2594	1086597343	Avicennia	schaueriana	Avicennia schaueriana	-48.5111	-25.6736	South America	Brazil	Pontal do ParanÃ¡		TRUE	TRUE	TRUE	TRUE	TRUE	TRUE	TRUE	TRUE	TRUE	TRUE
2595	1086597823	Avicennia	schaueriana	Avicennia schaueriana	-48.6161	-26.1169	South America	Brazil	ItapoÃ¡	BaÃ­a de SÃ£o Francisco	TRUE	TRUE	TRUE	TRUE	TRUE	TRUE	TRUE	TRUE	TRUE	TRUE
2598	1086600285	Avicennia	schaueriana	Avicennia schaueriana	-48.5111	-25.6736	South America	Brazil	Pontal do ParanÃ¡	Ponta do PoÃ§o	TRUE	TRUE	TRUE	TRUE	TRUE	TRUE	TRUE	TRUE	TRUE	TRUE
2600	1086600335	Avicennia	schaueriana	Avicennia schaueriana	-48.5558	-25.5917	South America	Brazil	ParanaguÃ¡	Parque Estadual do Palmito	TRUE	TRUE	TRUE	TRUE	TRUE	TRUE	TRUE	TRUE	TRUE	TRUE
2601	1086594742	Avicennia	schaueriana	Avicennia schaueriana	-48.5111	-25.6736	South America	Brazil	Pontal do ParanÃ¡		TRUE	TRUE	TRUE	TRUE	TRUE	TRUE	TRUE	TRUE	TRUE	TRUE
2606	1086608096	Avicennia	schaueriana	Avicennia schaueriana	-48.6678	-27.6453	South America	Brazil	PalhoÃ§a		TRUE	TRUE	TRUE	TRUE	TRUE	TRUE	TRUE	TRUE	TRUE	TRUE
2607	1086600915	Avicennia	schaueriana	Avicennia schaueriana	-48.5558	-25.5917	South America	Brazil	ParanaguÃ¡	Floresta estadual do Palmito.	TRUE	TRUE	TRUE	TRUE	TRUE	TRUE	TRUE	TRUE	TRUE	TRUE
2610	1086604956	Avicennia	schaueriana	Avicennia schaueriana	-48.5111	-25.6736	South America	Brazil	Pontal do ParanÃ¡		TRUE	TRUE	TRUE	TRUE	TRUE	TRUE	TRUE	TRUE	TRUE	TRUE
2621	1086664897	Avicennia	schaueriana	Avicennia schaueriana	-48.6114	-27.0903	South America	Brazil	Itapema	Praia do CabeÃ§o	TRUE	TRUE	TRUE	TRUE	TRUE	TRUE	TRUE	TRUE	TRUE	TRUE
2624	1086782564	Avicennia	schaueriana	Avicennia schaueriana	-48.6678	-27.6453	South America	Brazil	PalhoÃ§a		TRUE	TRUE	TRUE	TRUE	TRUE	TRUE	TRUE	TRUE	TRUE	TRUE
2625	1086782582	Avicennia	schaueriana	Avicennia schaueriana	-48.6678	-27.6453	South America	Brazil	PalhoÃ§a		TRUE	TRUE	TRUE	TRUE	TRUE	TRUE	TRUE	TRUE	TRUE	TRUE
2627	1086898275	Avicennia	schaueriana	Avicennia schaueriana	-46.39	-23.96	South America	Brazil	SÃ£o Vicente	P.E.XixovÃ¡-Japui	TRUE	TRUE	TRUE	TRUE	TRUE	TRUE	TRUE	TRUE	TRUE	TRUE
2630	1086949581	Avicennia	schaueriana	Avicennia schaueriana	-46.39	-23.96	South America	Brazil	SÃ£o Vicente	Parque Estadual XixovÃ¡-JapuÃ­, JapuÃ­	TRUE	TRUE	TRUE	TRUE	TRUE	TRUE	TRUE	TRUE	TRUE	TRUE
2633	1086873394	Avicennia	schaueriana	Avicennia schaueriana	-46.33	-23.96	South America	Brazil	Santos	matadouro,	TRUE	TRUE	TRUE	TRUE	TRUE	TRUE	TRUE	TRUE	TRUE	TRUE
